# Supplementary material for: Benzoxazole derivatives as new VEGFR-2 inhibitors and apoptosis inducers: design, synthesis, in silico studies, and antiproliferative evaluation
Source: PubMed Central journal article supplement (PMC9327782; doi:10.1080/14756366.2022.2103552), 2022-07-25

**Benzoxazole derivatives as new VEGFR-2 inhibitors and apoptosis inducer: design, synthesis, *in silico* studies, and antiproliferative evaluation**

Mohammed S. Taghour<sup>a</sup>, Hazem A. Mahdy<sup>a</sup>, Maher H. Gomaa<sup>b</sup>, Ahmed Aglan<sup>b</sup>, Mahmoud Gomaa Eldeib<sup>b</sup>, Alaa Elwan<sup>a</sup>, Mohammed A. Dahab<sup>a</sup>, Eslam B. Elkaeed<sup>c</sup>, Aisha A. Alsfouk<sup>d</sup>, Mohamed M. Khalifa<sup>a</sup>, Ibrahim H. Eissa<sup>a\*</sup>, Hazem Elkady<sup>a\*</sup>

<sup>a</sup> Pharmaceutical Medicinal Chemistry & Drug Design Department, Faculty of Pharmacy (Boys), Al-Azhar University, Cairo 11884, Egypt.

<sup>b</sup> Biochemistry and Molecular Biology Department, Faculty of Pharmacy (Boys), Al-Azhar University, Cairo 11884, Egypt.

<sup>c</sup> Department of Pharmaceutical Organic Chemistry, Faculty of Pharmacy (Boys), Al-Azhar University, Nasr City, 11884, Cairo, Egypt.

<sup>d</sup> Department of Pharmaceutical Sciences, College of Pharmacy, Princess Nourah bint Abdulrahman University, P.O. Box 84428, Riyadh 11671, Saudi Arabia

**\* Corresponding authors:**

**Ibrahim H. Eissa**

Pharmaceutical Medicinal Chemistry & Drug Design Department, Faculty of Pharmacy (Boys), Al-Azhar University, Cairo 11884, Egypt

**Email:** [Ibrahimeissa@azhar.edu.eg](mailto:Ibrahimeissa@azhar.edu.eg)

**Hazem Elkady:**

Pharmaceutical Medicinal Chemistry & Drug Design Department, Faculty of Pharmacy (Boys), Al-Azhar University, Cairo 11884, Egypt.

**Email:** [Hazemelkady@azhar.edu.eg](mailto:Hazemelkady@azhar.edu.eg)

## Content

|   |                                                                         |
|---|-------------------------------------------------------------------------|
| 1 | Experimental chemistry                                                  |
| 2 | Experimental of biological testing                                      |
| 3 | Molecular docking                                                       |
| 4 | Spectral data of the final target compounds <b>12a-l</b> & <b>13a-c</b> |
| 5 | Raw data of cytotoxicity and VEGFR-2 assay                              |

### Experimental chemistry

All solvents and reagents were commercially available and used without further purification. Reactions progression were monitored by TLC sheets coated with UV fluorescent silica gel (Kieselgel 0.25mm, 60 F254, Merck Germany) and were visualized using UV lamp. The melting points were determined using a Gallen lamp melting point apparatus. The infrared spectra were recorded on FT/IR-6600typeA spectrophotometer. <sup>1</sup>H NMR spectra were recorded at 400 and 700 MHz, while <sup>13</sup>C NMR spectra were run at 100 and 176 MHz, on a Bruker Avance NEO-600 equipped with a 1.7 mm TCI CryoProbe. Chemical shifts were expressed in δ (ppm) with reference to TMS and coupling constant (J) in Hertz using DMSO-d<sub>6</sub> and CDCl<sub>3</sub>-d<sub>6</sub> as solvents. The mass spectra were recorded on an Agilent 6410 triple-quadrupole mass spectrometer equipped with an ESI source.

### Experimental of biological testing

#### **1. *In vitro* anti-proliferative activity**

MTT assay protocol was applied to assess the anti-proliferative activity of the synthesized compounds. Two human cancer cell lines (MCF-7 and HepG-2) and one normal cell line (WI-38) were used in this test. At first, the cell lines were cultured in RPMI-1640 medium with 10% fetal bovine serum. Antibiotics (100 units/ml penicillin and 100 µg/ml streptomycin) were added at 37°C in a 5% CO<sub>2</sub> incubator. The cell lines were seeded in a 96-well plate at a density of 1.0 x 10<sup>4</sup> cells / well at 37 °C for 24 h under 5% CO<sub>2</sub>. After incubation, the cells were treated with different

concentration of the synthesized compounds and incubated for 24 h. After 24 h of drug treatment, 20  $\mu$ l of MTT solution at 5mg/ml was added and incubated for 4 h. Dimethyl sulfoxide (DMSO) in volume of 100  $\mu$ l was added into each well to dissolve the purple formazan formed. The colorimetric assay was measured and recorded at absorbance of 570 nm using a plate reader (EXL 800, USA). The relative cell viability in percentage was calculated as (A570 of treated samples/A570 of untreated sample) X 100.

## **2. *In vitro* VEGFR-2 kinase assay**

All the synthesized compounds were tested for its inhibitory activity against VEGFR-2. Human VEGFR-2 ELISA kit (Enzyme-Linked Immunosorbent Assay) was utilized in this test. At first, specific antibody for VEGFR-2 was seeded on a 96-well plate and 100  $\mu$ L of the standard solution or the tested compound was added, all were incubated at room temperature for 2.5 h. Then washed, 100  $\mu$ L of the prepared biotin antibody was added, then incubated at room temperature for additional 1 h. and washed. Then, 100  $\mu$ L of streptavidin solution was added and incubated for 45 min. at room temperature. Washed again, 100  $\mu$ L of TMB Substrate reagent was added and incubated for 30 min. at room temperature. 50  $\mu$ L of the stop solution was added, then read at 450 nm immediately. The standard curve was drawn, concentrations on the X-axis and the absorbance on the Y-axis.

## **3. Flow cytometry analysis for cell cycle**

To determine the role of the synthesized compounds in cell cycle distribution, cell cycle analysis was performed using propidium iodide (PI) staining and flow cytometry analysis for compound **12I**. Flow Cytometry Kit for Cell Cycle Analysis (ab139418\_Propidium Iodide Flow Cytometry Kit/BD) was used in this test. HepG2 cells were treated with compound **12I** (10.50  $\mu$ M) for 24 h. Then, the cells were fixed in 70% ethanol at 4  $^{\circ}$ C for 12 h. After that, the cells were washed with cold PBS, incubated with 100  $\mu$ l RNase A at 37  $^{\circ}$ C for 30 min, and stained with 400  $\mu$ l PI in the dark at room temperature for further 30 min. The stained cells were measured using Epics XL-MCL™ Flow Cytometer (Beckman Coulter), and the data were analyzed using Flowing software (version 2.5.1, Turku Centre for Biotechnology, Turku, Finland).

#### 4. Flow cytometry analysis for apoptosis

Flow cytometry cell apoptosis analysis was used to investigate the apoptotic effect of the synthesized compounds. HepG2 cells were treated with compound **12I** (10.50  $\mu$ M) for 24 h, collected by trypsin, centrifuged, washed two successive times with PBS, suspended in 500  $\mu$ l binding buffer, and double stained with 5  $\mu$ l Annexin V-FITC and 5  $\mu$ l PI in the dark at room temperature for 15 min. The stained cells were measured using Epics XL-MCL™ Flow Cytometer and analyzed using Flowing software.

#### 5. Western blot analysis

The proteins expression of cleaved caspase-3, BAX, and Bcl-2 were determined using Western blot analysis. In brief, HepG2 cells were treated with control, or with the synthesized compounds. Then cells were lysed in 250  $\mu$ L precool lysis buffer (pH 7.4: Tris-Base [10 mM], NaCl [100 mM], ethylenediaminetetraacetic acid [EDTA, 25 mM], ethylene glycol bis (2-aminoethyl) tetraacetic acid [EGTA, 25 mM], 1% [v/v] NP-40, and 1% [v/v] Triton X-100) supplemented with 1:350 protease:phosphatase inhibitors cocktail (Sigma). The cells were immediately frozen at  $-20^{\circ}\text{C}$  for 1.5 hours for further lysis, collected by cell scraper, sonicated  $3 \times 10$  seconds, and centrifuged (13000 rpm, 15 minutes). Total protein concentrations in the supernatant were determined colorimetrically using the Pierce 660 nm Protein Assay method (Thermo Fisher Scientific, Rockford, IL), with BSA as the standard. Equal amounts of protein (25  $\mu$ g) samples were mixed with SDS-loading buffer (pH 6.8: Tris-HCl [700 mM], dithiothreitol [DTT, 600 mM], sodium dodecyl sulfate [SDS, 12%], glycerol [60%], and bromophenol blue [0.012%]), denatured by boiling at  $95^{\circ}\text{C}$  for 10 minutes, allowed to cool on ice for 15 minutes, vortexed vigorously for 30 seconds and loaded into SDS-polyacrylamide gel and separated by an electrophoresis unit (Cleaver Scientific Ltd, UK), transferred onto polyvinylidene fluoride membranes (Bio-Rad) for 35 minutes using a Trans-Blot SD semi-dry transfer cell (Bio-Rad) at 250 mA and 22 V. Membranes were blocked with 5% (w/v) blotting grade dry milk (Bio-Rad) in Tris-buffered saline/Tween-20 (TBS-T) (pH 7.5: Tris-base [20 mM], NaCl [150 mM], and 0.05% [v/v] Tween- 20) while shaking for 1.5 hour at RT, and then incubated with the corresponding primary antibody against cleaved caspase-3 antibody (1:000, #9661; Cell Signaling Technology),  $\beta$ -actin (1:2000, #A5060; Sigma), BAX (Biovision, USA) and Bcl-2( Bioimaging, system, syngene, UK) for 9-10 hours at  $4^{\circ}\text{C}$  in a

humidified chamber. The blots were washed with TBS-T three times for 15 minutes and incubated with matched horseradish peroxidase (HRP)-linked secondary antibodies (Dako, Denmark) for another 1 hour at RT, followed by washing  $3 \times 15$  min with TBS-T. After membranes were incubated at RT with 1:1 reagent mixture of chemiluminescence Western Lightning ECL (Perkin Elmer, Waltham, MA) for 1 minute, the bands were visualized in Chemi-Doc imager (Bio-Rad). Means of the detected blot intensities were then quantified, analyzed by the combined Bio-Rad Image Lab software and their corresponding background subtracted, with normalization to the corresponding bands density of  $\beta$ -actin as the sampling loading control. Data were collected from three separate experiments.

### **Molecular docking**

The docking studies were performed utilizing MOE.14 software to explore the binding mode of the synthesized compounds towards VEGFR-2. The crystal structure of VEGFR-2 was downloaded from the Protein Data Bank, <http://www.rcsb.org/pdb> (PDB ID: 4ASD, resolution: 2.03 Å). Sorafenib was used as reference ligand. To prepare the target protein, water molecules were removed, and the valances of atoms were corrected through protonation of the whole molecule. Then energy minimization was carried out by applying CHARMM and MMFF94 force fields. After that, the active binding site was defined and prepared for docking. The validation process was performed by redocking the co-crystallized ligand. The designed compounds together with sorafenib were drawn using ChemBioDraw Ultra 14.0 and saved as MDL-SD format. The sketched compounds were constructed from fragment libraries in MOE program, protonated, followed by energy minimization then prepared for docking. Docking process was carried through Triangle matcher placement inserted in compute window, and the scoring function was London dG. Ten conformers (poses) for each molecule were generated using genetic algorithm searches. The free energies and binding modes of the designed molecules against VEGFR-2 were determined. The most ideal pose was selected according to its binding free energy as well as its binding mode with target molecule.



**<sup>1</sup>H NMR of 12a**

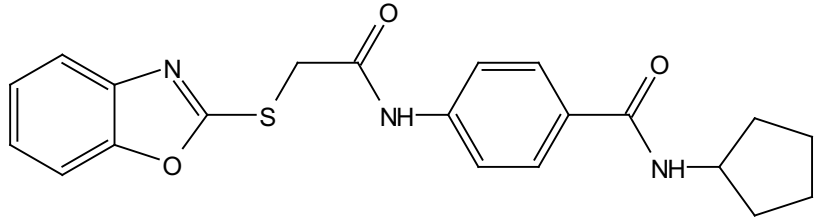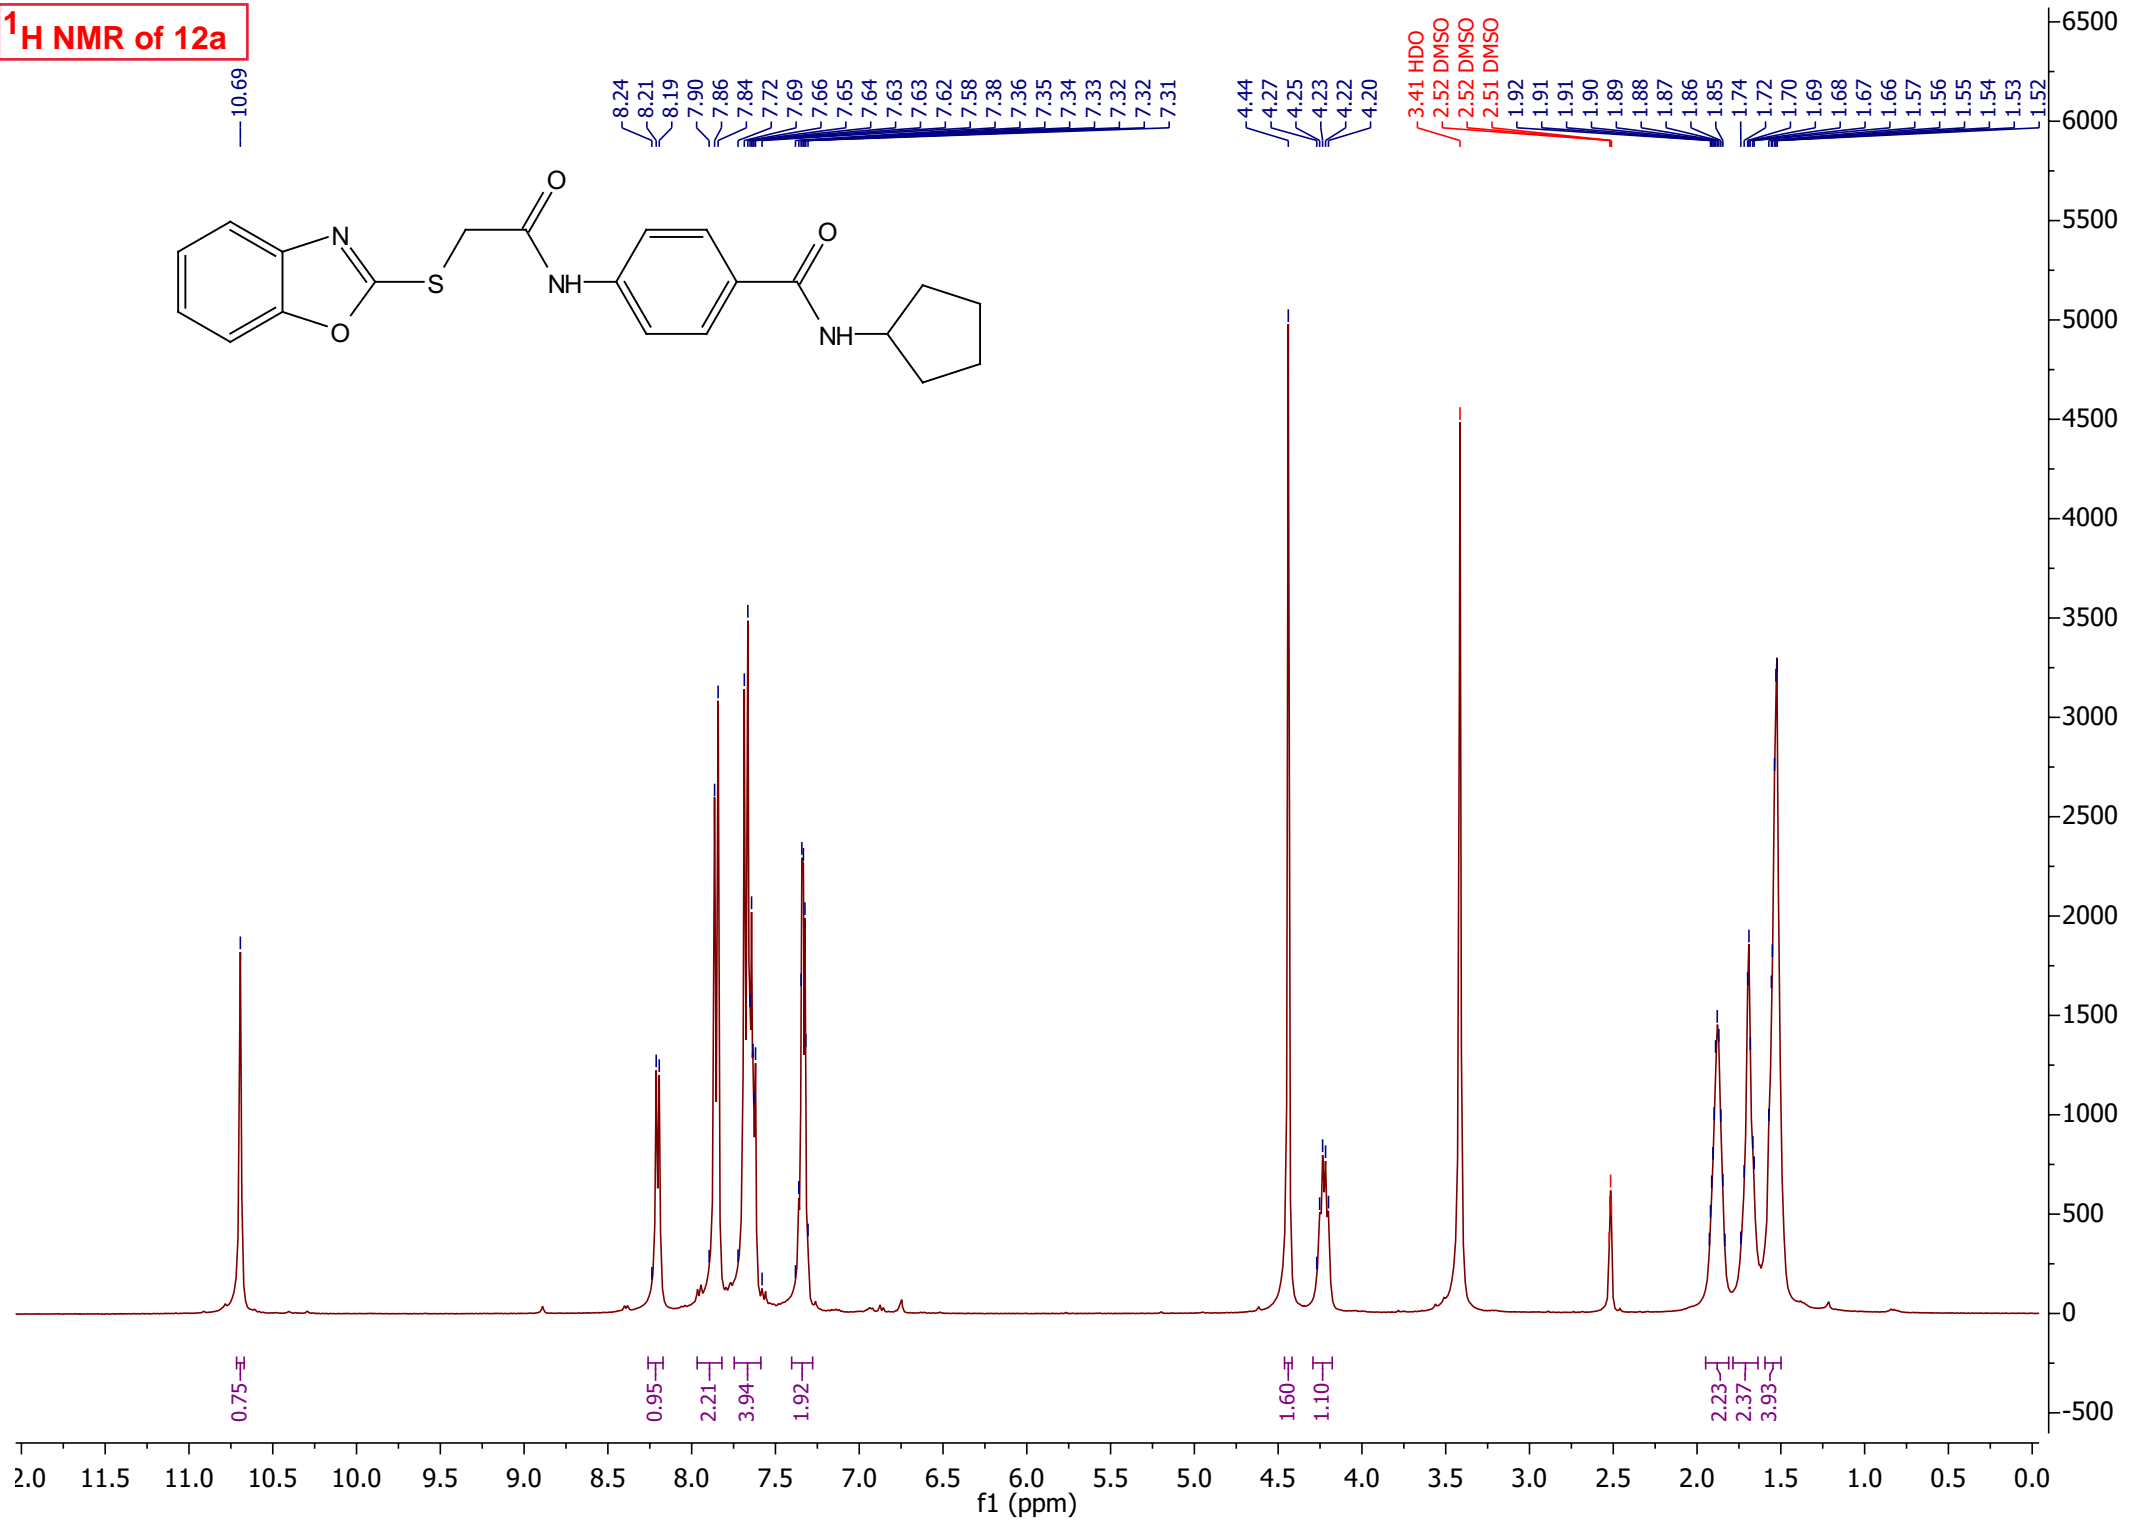

**<sup>1</sup>H NMR of 12a**

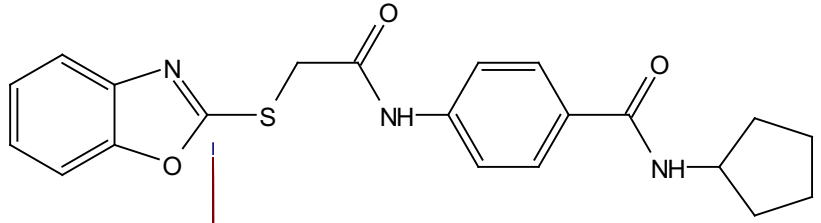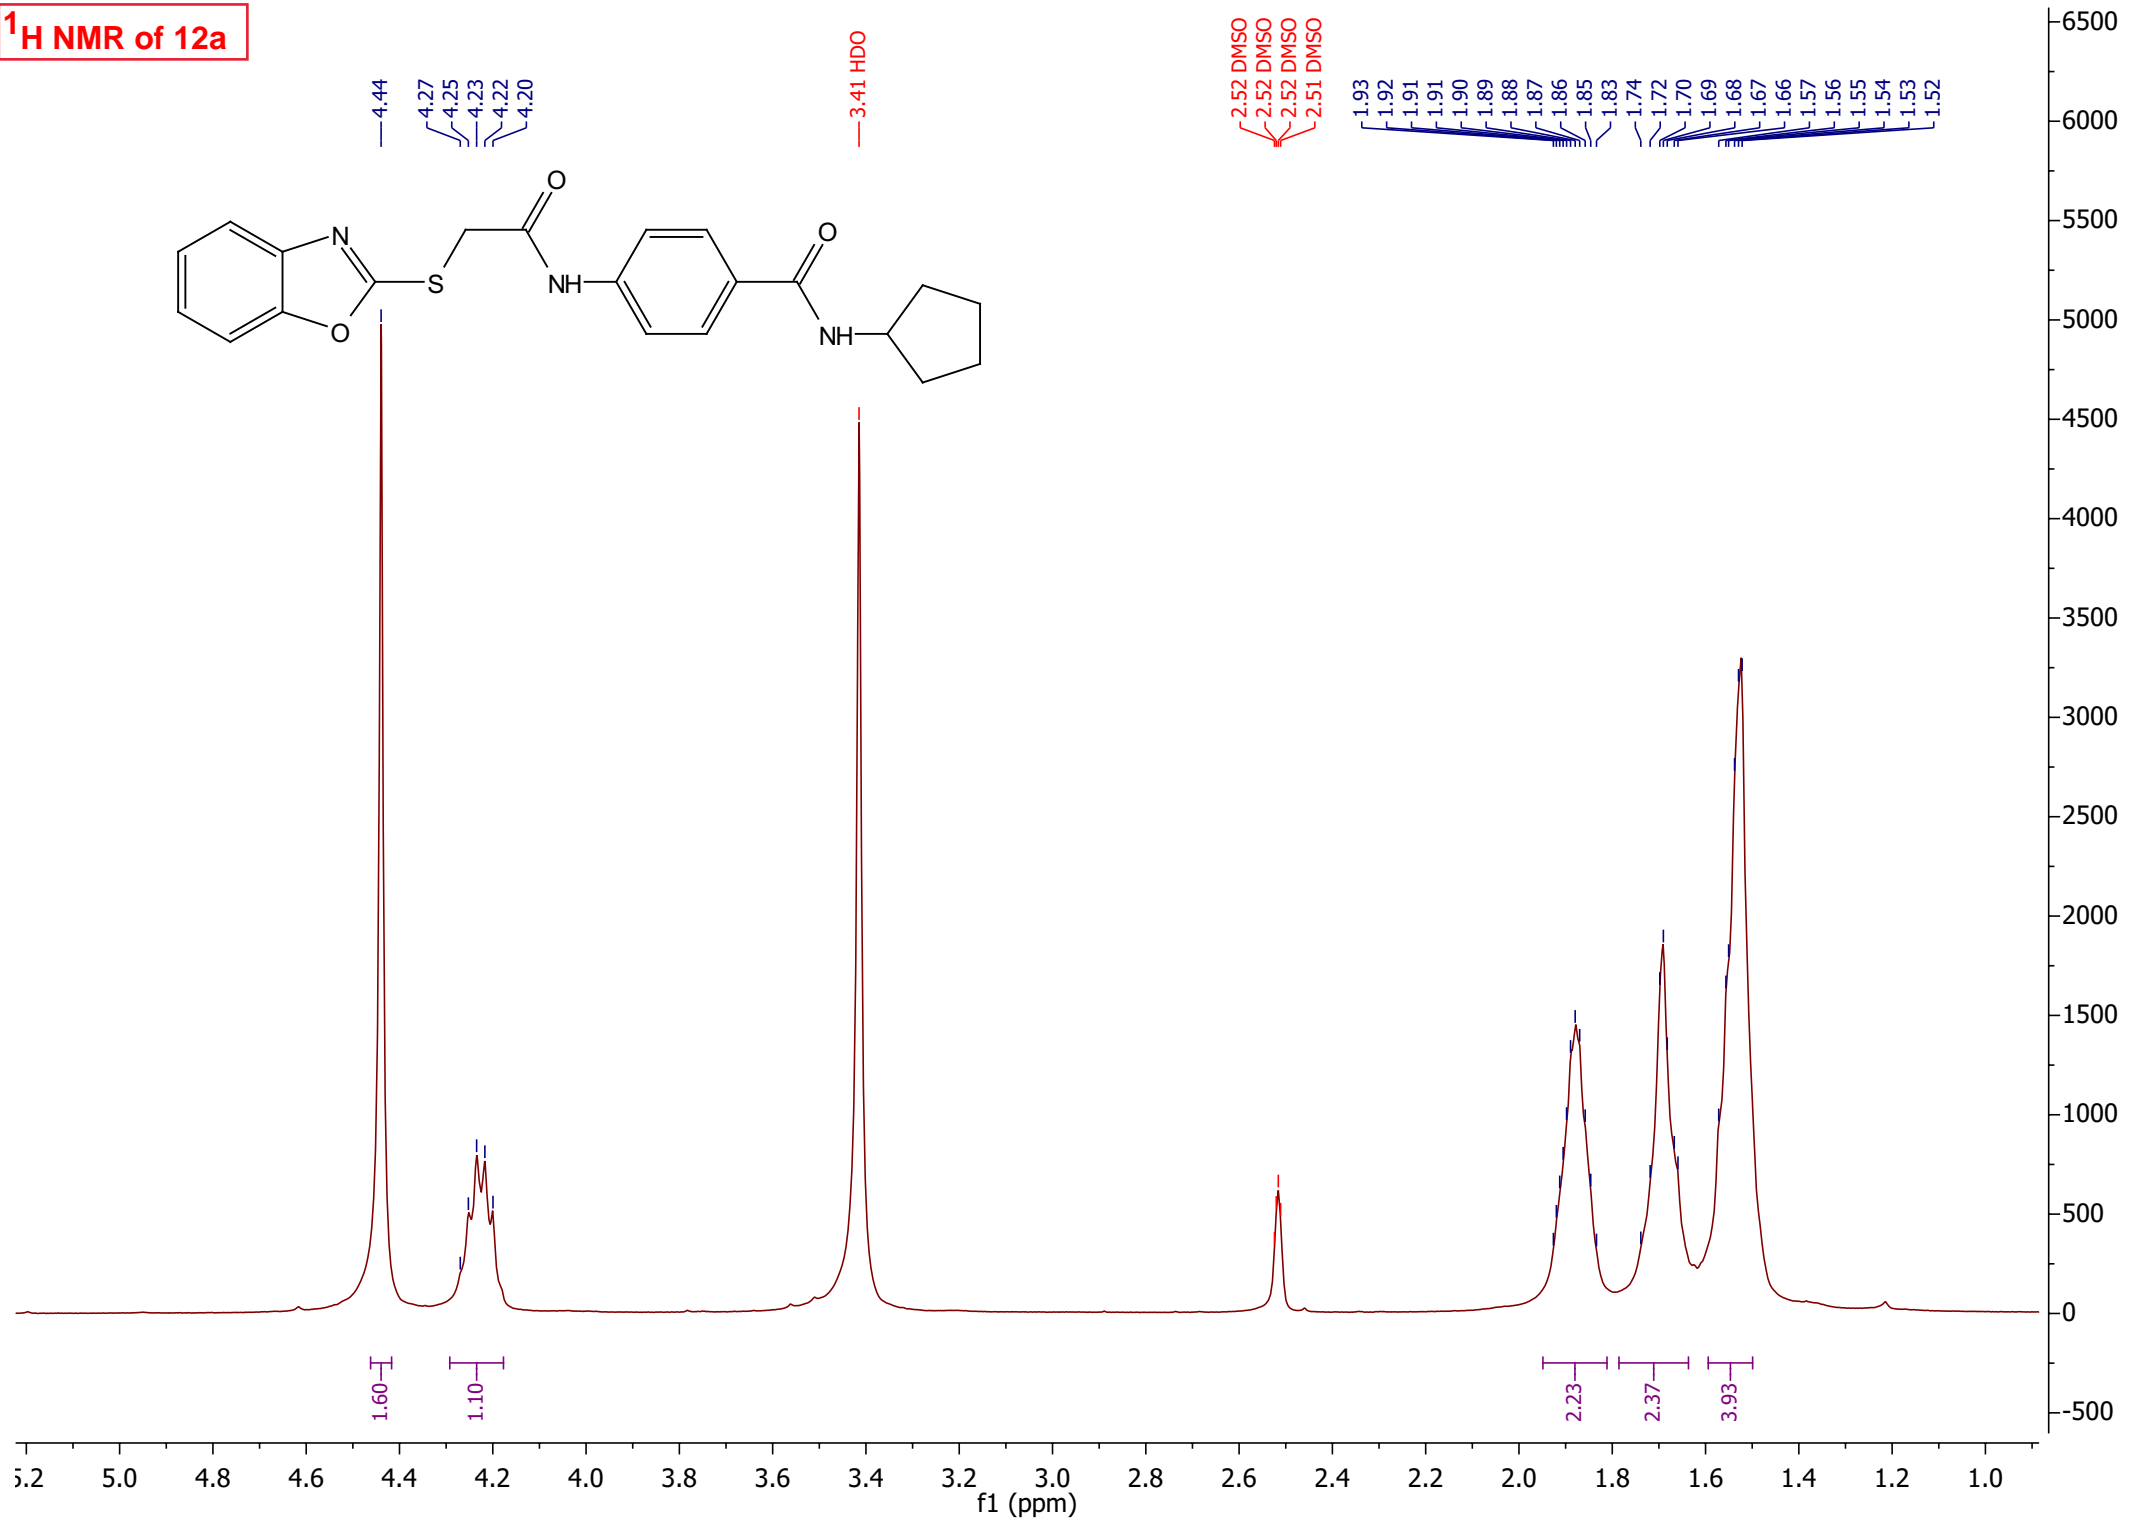



<sup>1</sup>H NMR PBA20

<sup>1</sup>H NMR of 12a

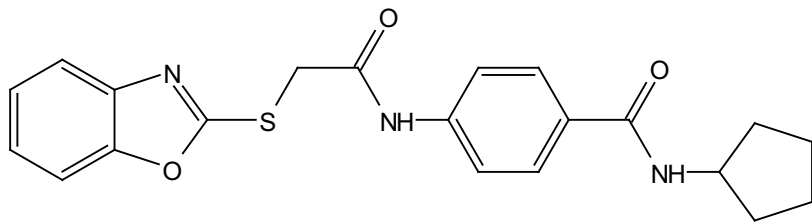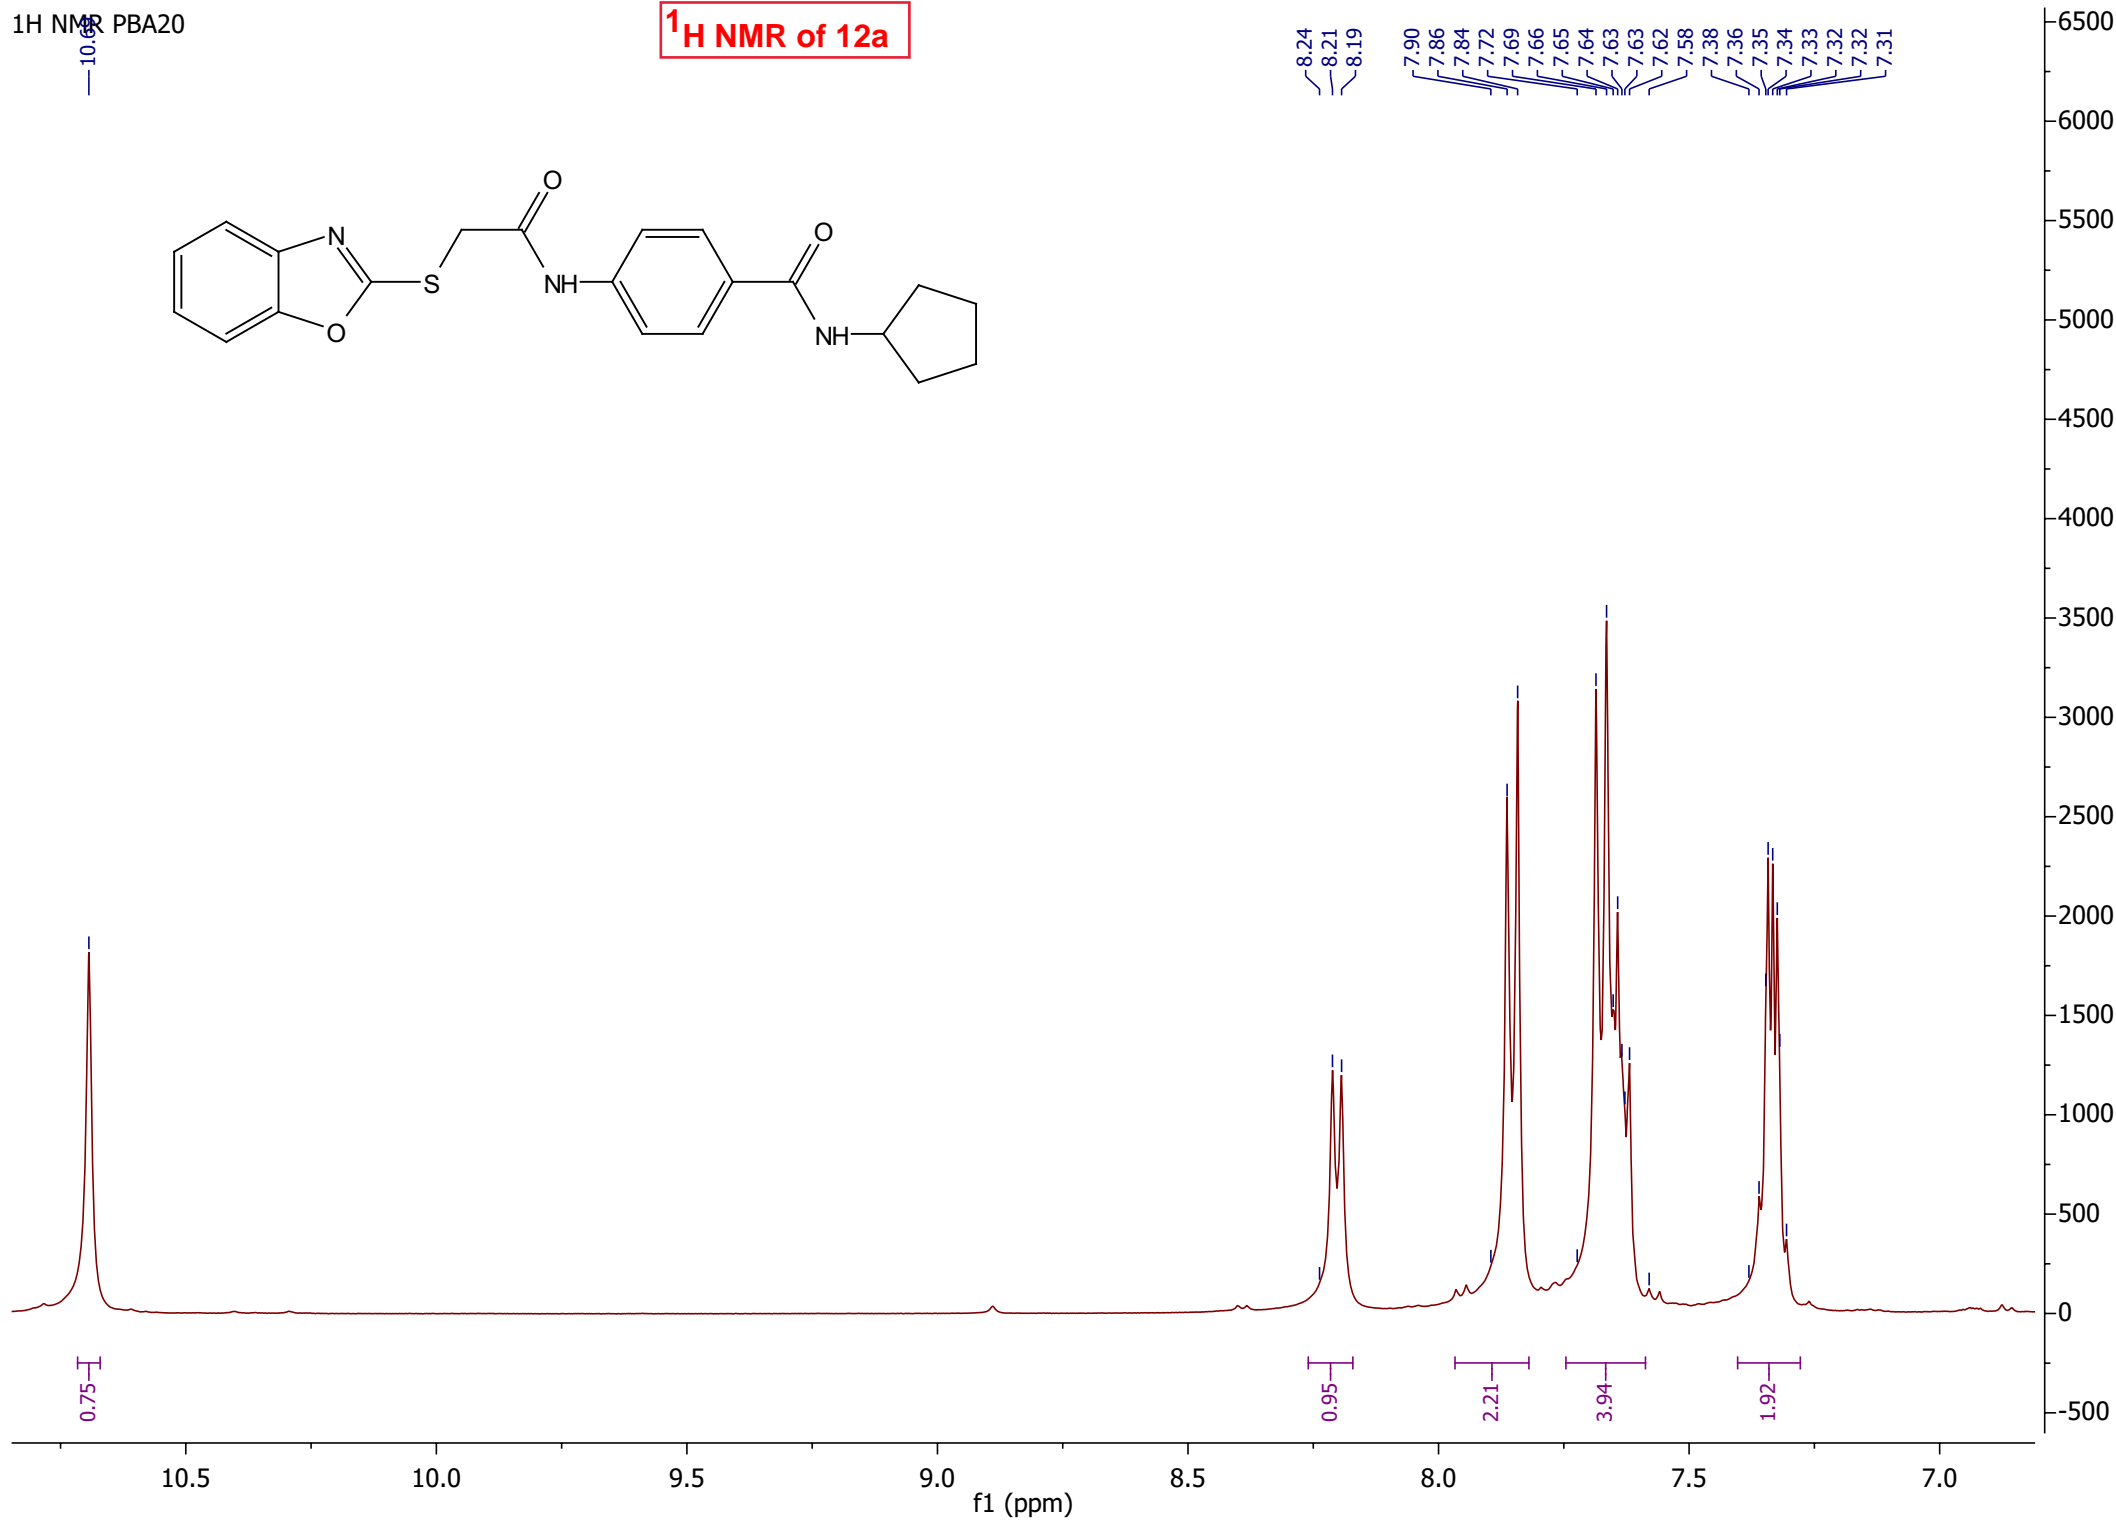

**<sup>13</sup>C NMR of 12a**

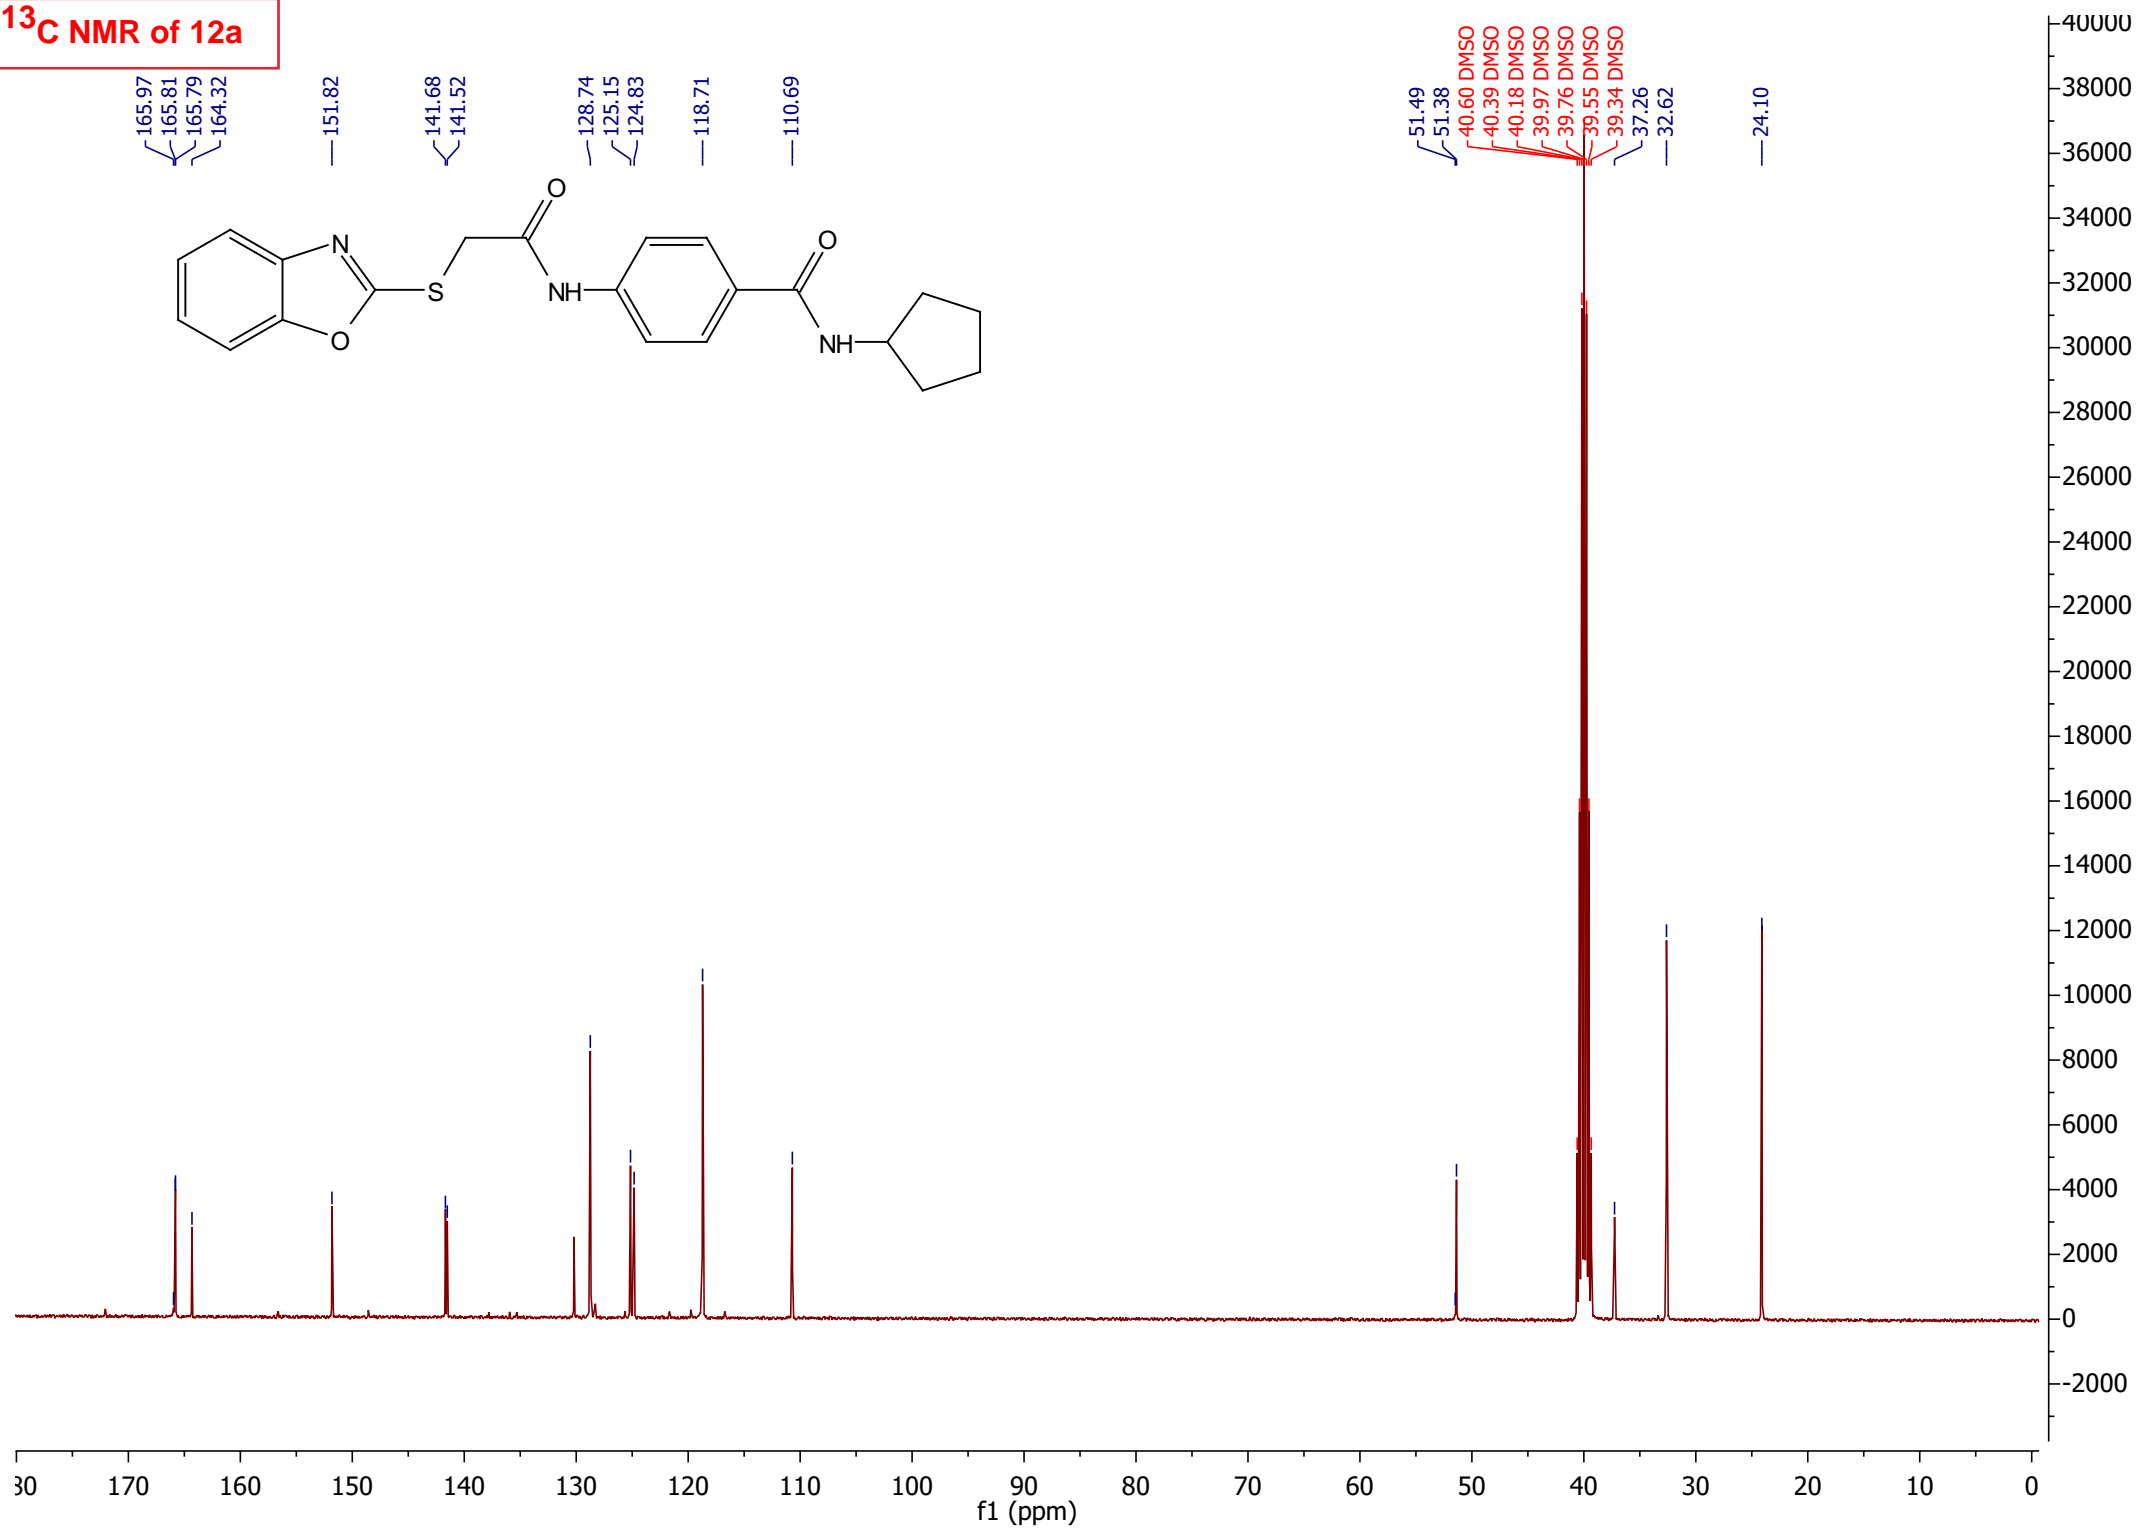

**<sup>13</sup>C NMR of 12a**

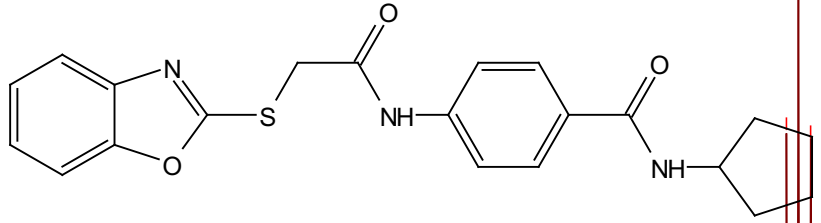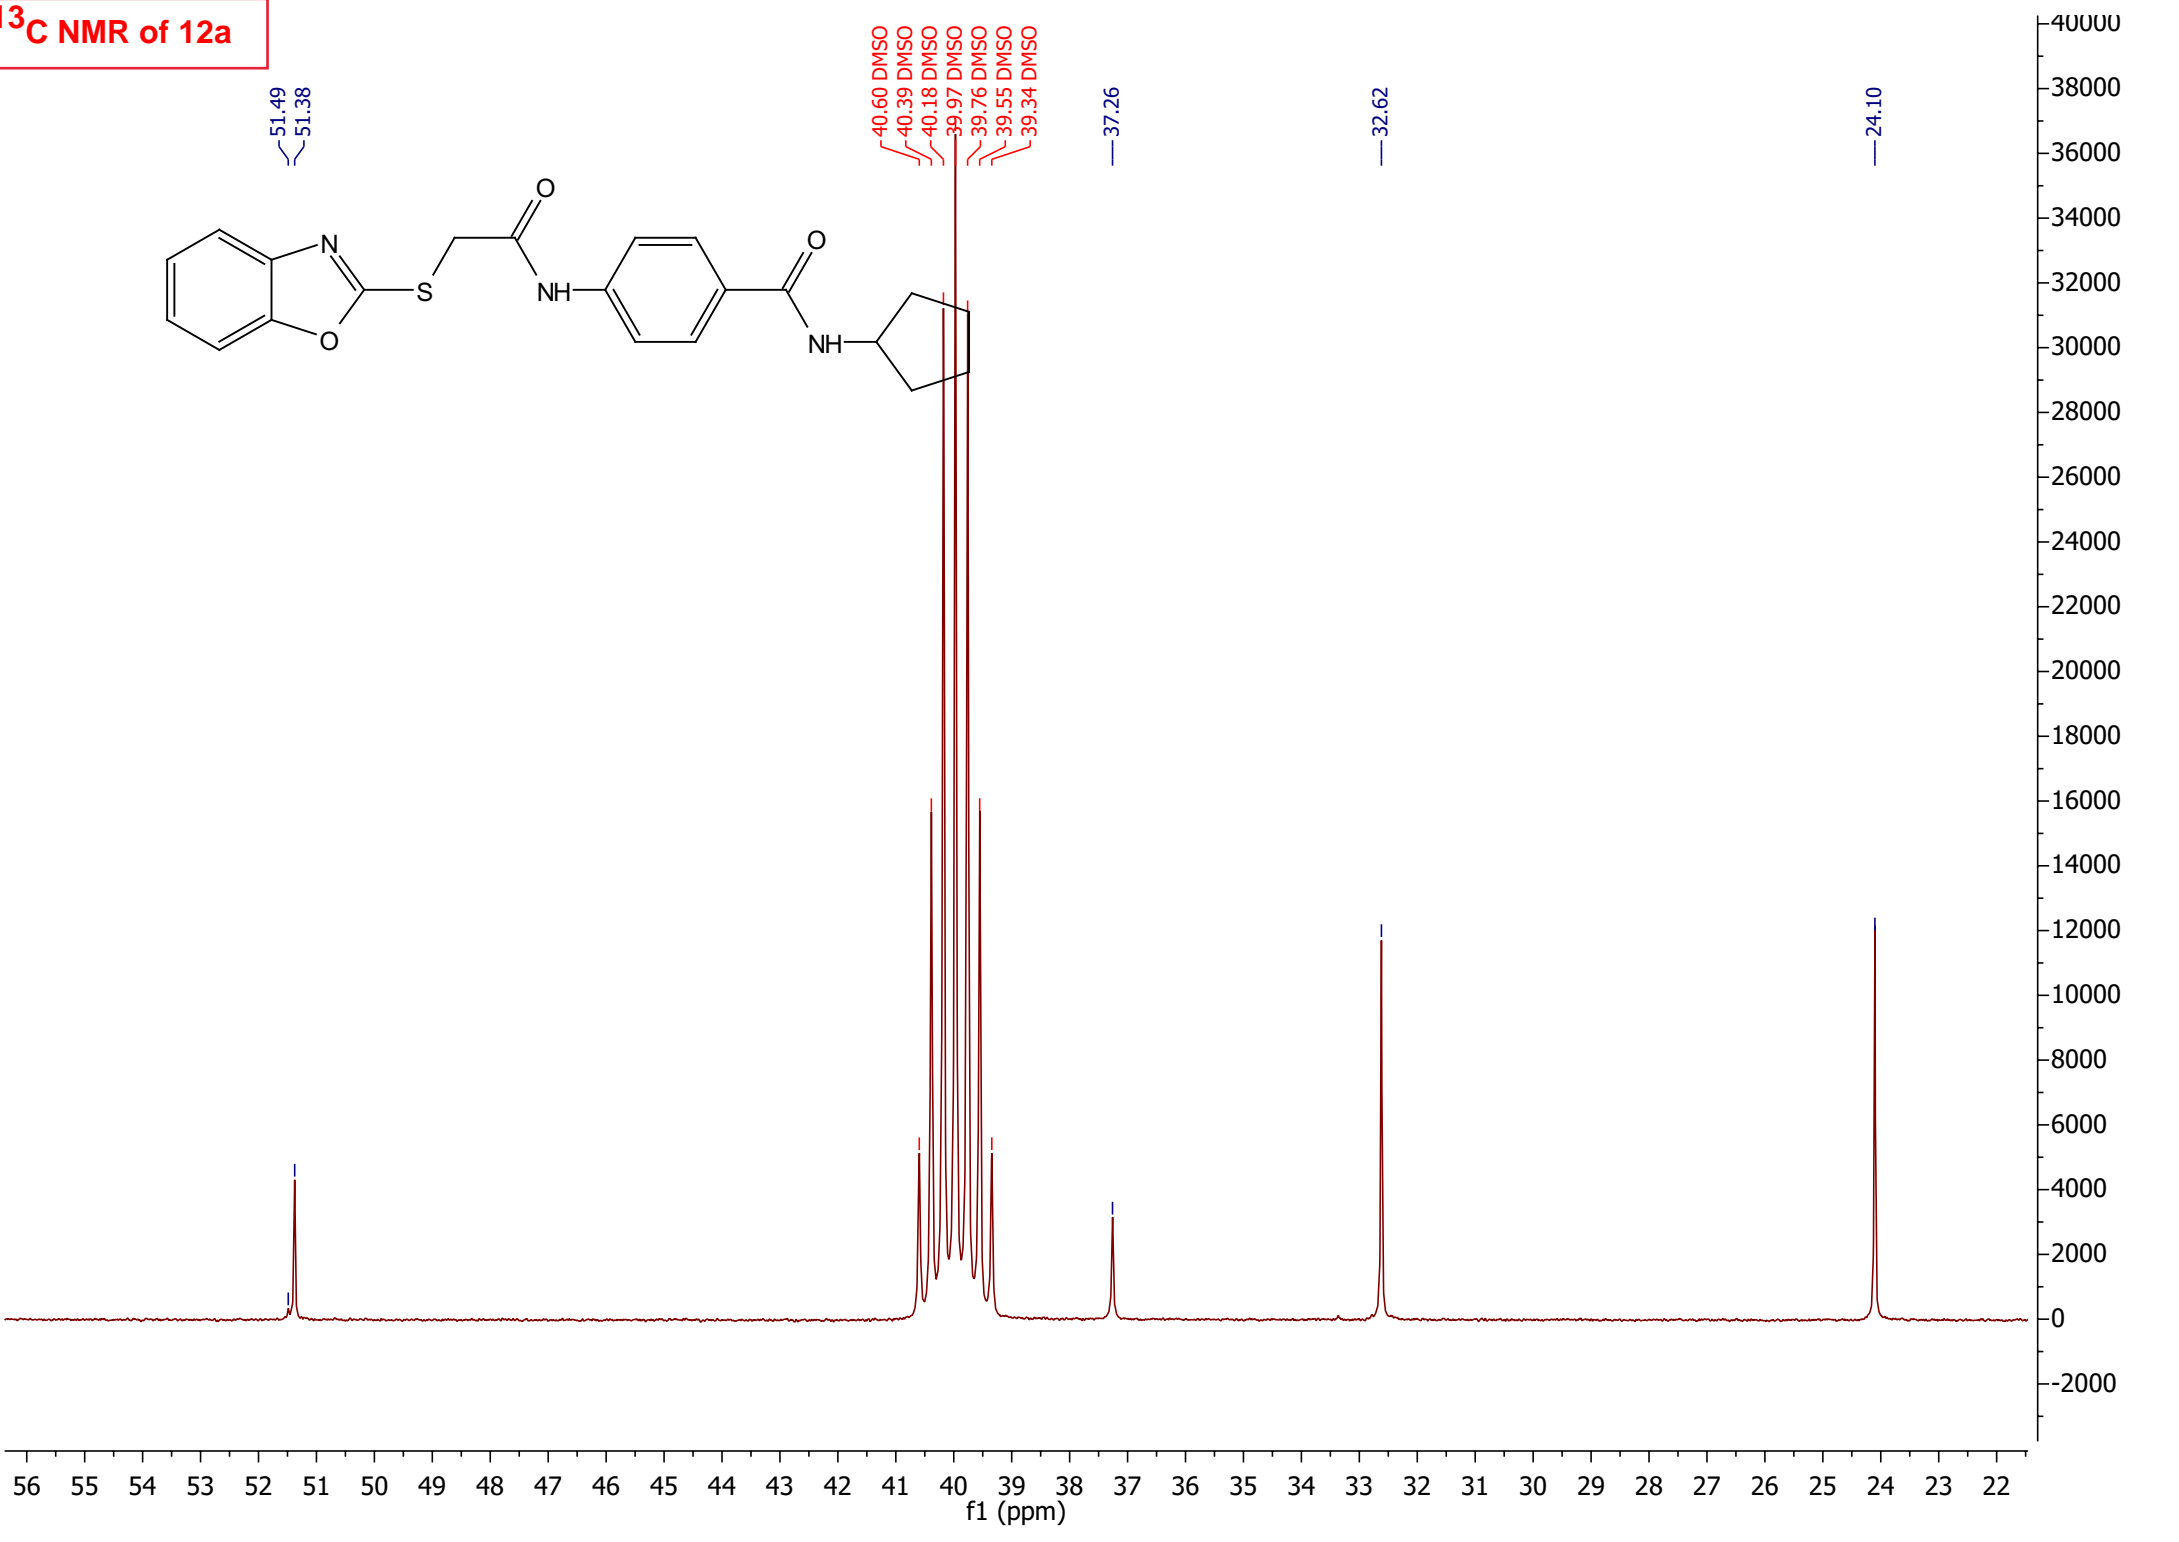

**<sup>13</sup>C NMR of 12a**

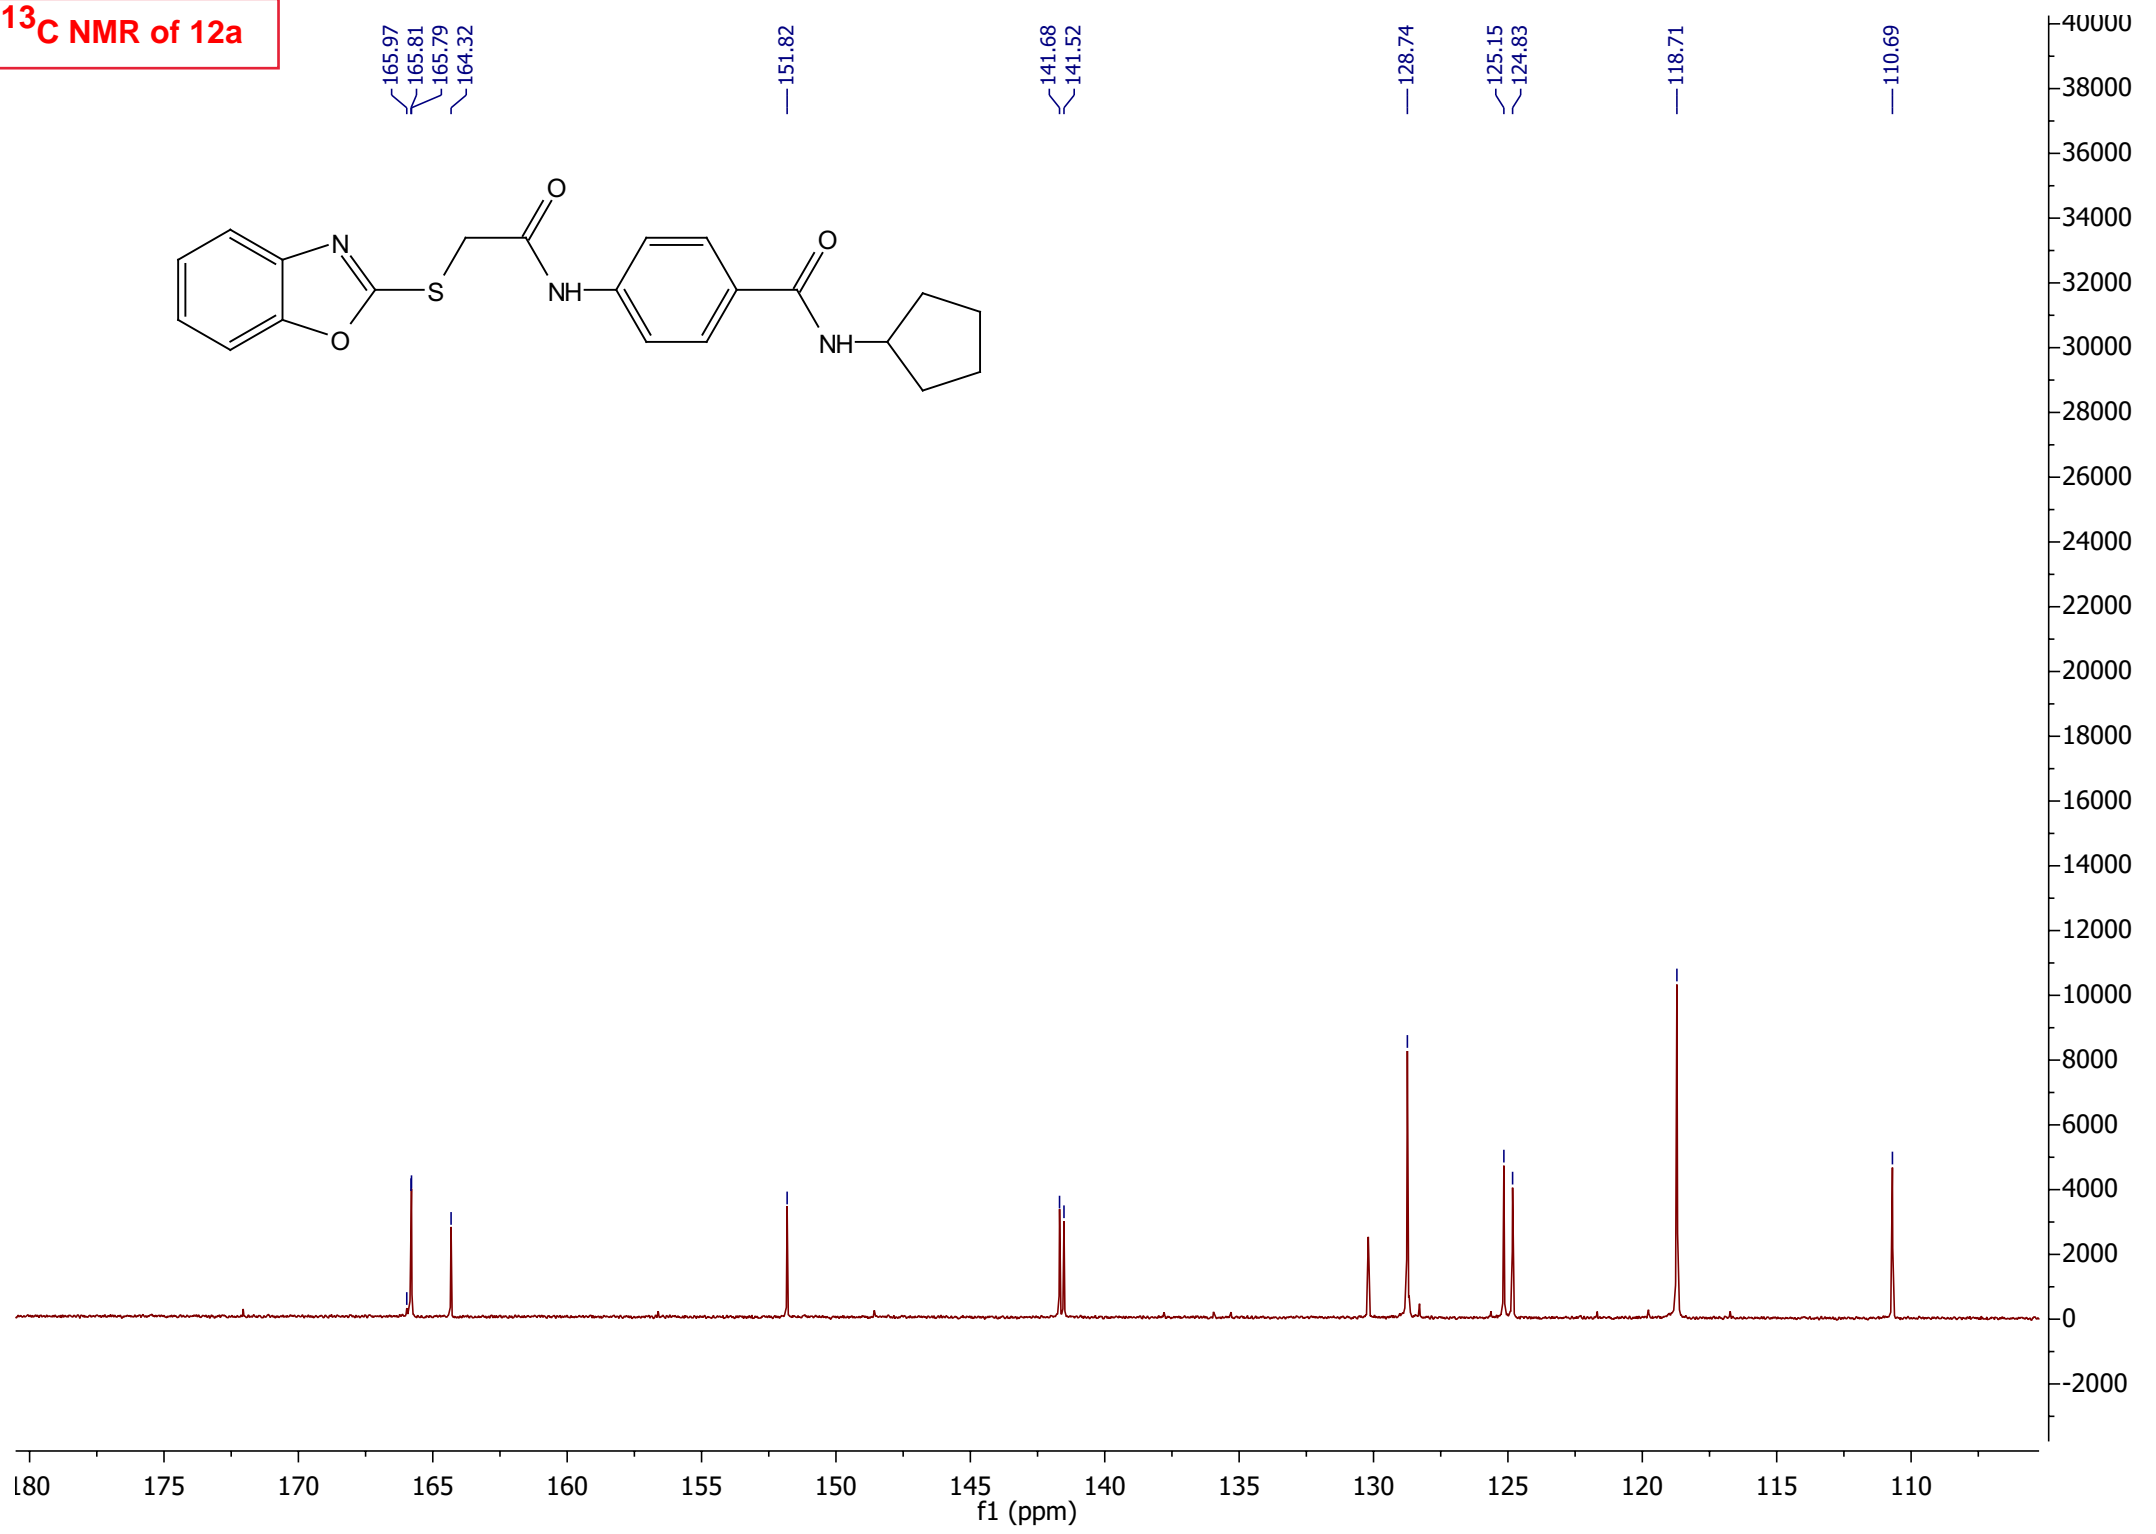

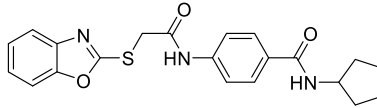

Mass spec. of 12a

RT: 0.00 - 2.44 SM: 7G

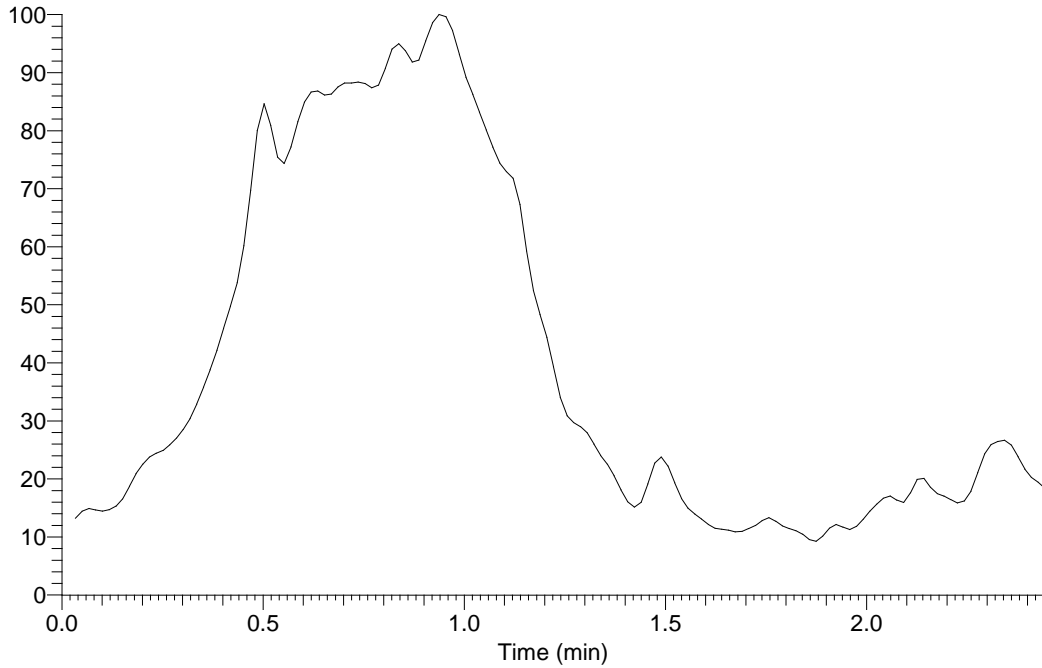

NL:  
1.16E5  
TIC MS  
Hazem-  
Abdelhady-  
PBA20

Hazem-Abdelhady-PBA20 #70 RT: 1.19 AV: 1 NL: 1.86E4  
T: + c EI Full ms [40.00-1000.00]

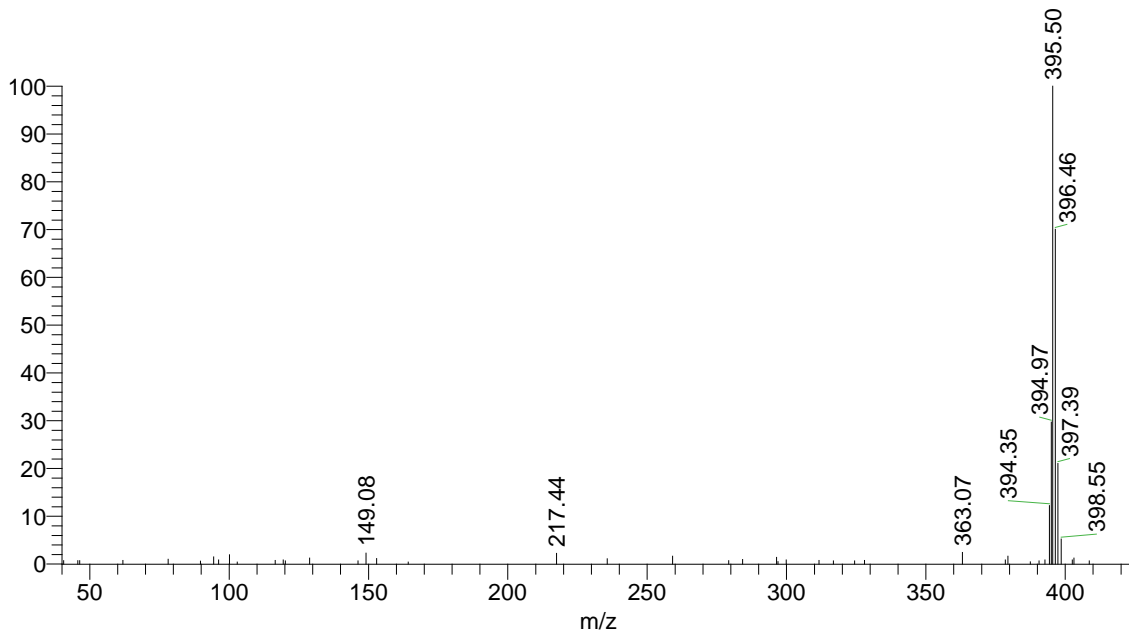

# IR Of Comp. 12b

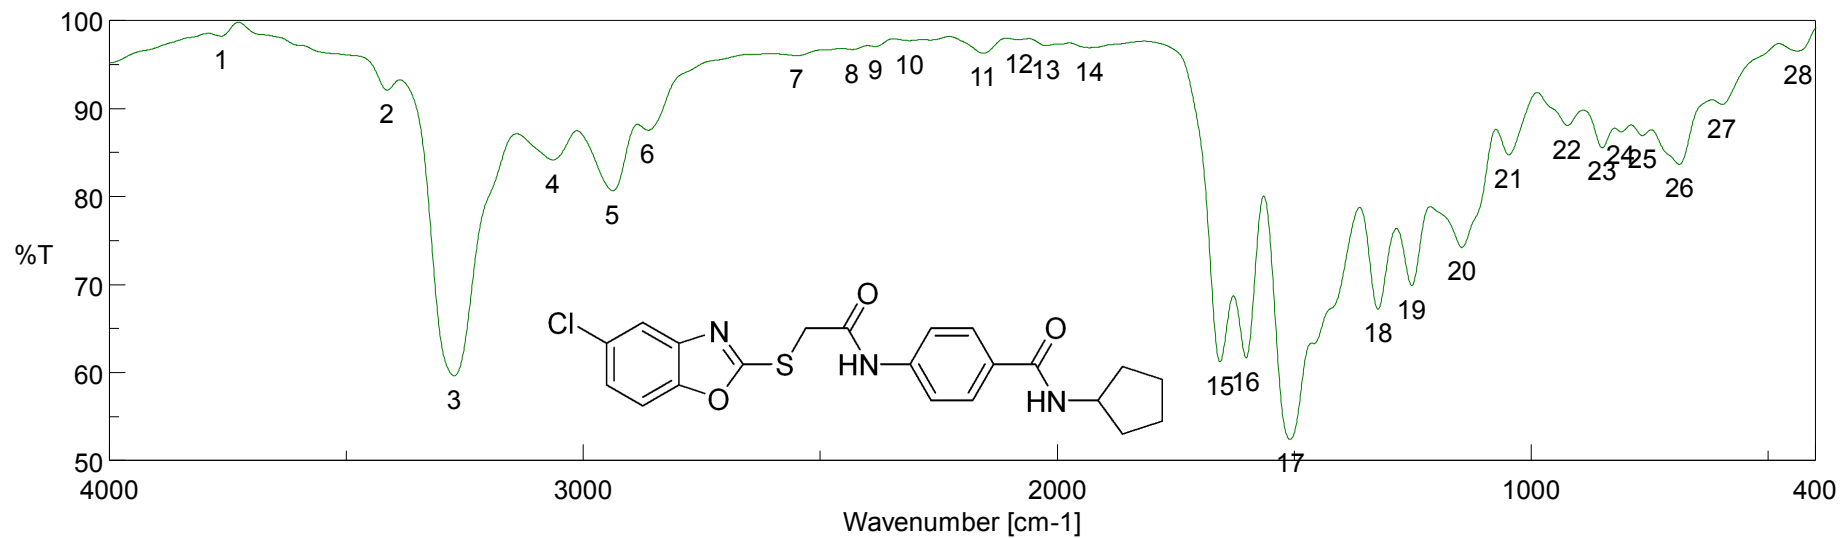

### [ Result of Peak Picking ]

| No. | Position | Intensity | No. | Position | Intensity | No. | Position | Intensity | No. | Position | Intensity |
|-----|----------|-----------|-----|----------|-----------|-----|----------|-----------|-----|----------|-----------|
| 1   | 3764.37  | 98.1786   | 2   | 3414.35  | 92.0624   | 3   | 3272.61  | 59.6159   | 4   | 3064.33  | 84.1362   |
| 5   | 2938.02  | 80.6324   | 6   | 2863.77  | 87.5016   | 7   | 2549.43  | 95.9834   | 8   | 2432.76  | 96.6686   |
| 9   | 2383.59  | 97.0033   | 10  | 2311.27  | 97.6886   | 11  | 2156.03  | 96.2553   | 12  | 2080.82  | 97.7882   |
| 13  | 2023.93  | 97.1211   | 14  | 1932.32  | 96.8889   | 15  | 1656.55  | 61.1879   | 16  | 1601.59  | 61.6755   |
| 17  | 1508.06  | 52.3941   | 18  | 1322.93  | 67.1783   | 19  | 1251.58  | 69.8684   | 20  | 1145.51  | 74.1862   |
| 21  | 1046.19  | 84.7078   | 22  | 923.736  | 88.0384   | 23  | 849.49   | 85.5219   | 24  | 809.956  | 87.3371   |
| 25  | 764.637  | 86.9007   | 26  | 686.534  | 83.6398   | 27  | 596.861  | 90.4451   | 28  | 436.798  | 96.5154   |

**<sup>1</sup>H NMR of 12b**

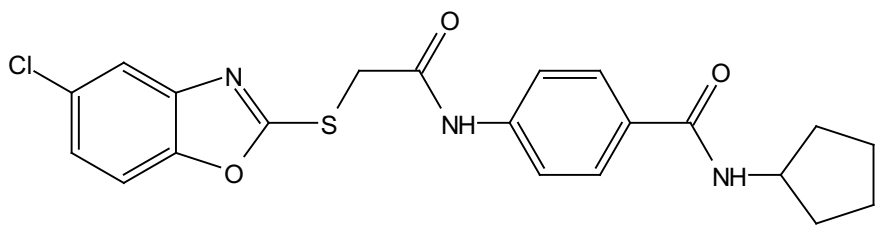

10.68  
8.20, 8.19, 7.91, 7.86, 7.84, 7.74, 7.74, 7.70, 7.68, 7.67, 7.65, 7.38, 7.37, 7.36, 7.35  
4.45, 4.27, 4.25, 4.23, 4.21, 4.20  
1.92, 1.91, 1.90, 1.89, 1.88, 1.87, 1.85, 1.74, 1.72, 1.70, 1.69, 1.68, 1.67, 1.66, 1.57, 1.55, 1.54, 1.53, 1.52, 1.50

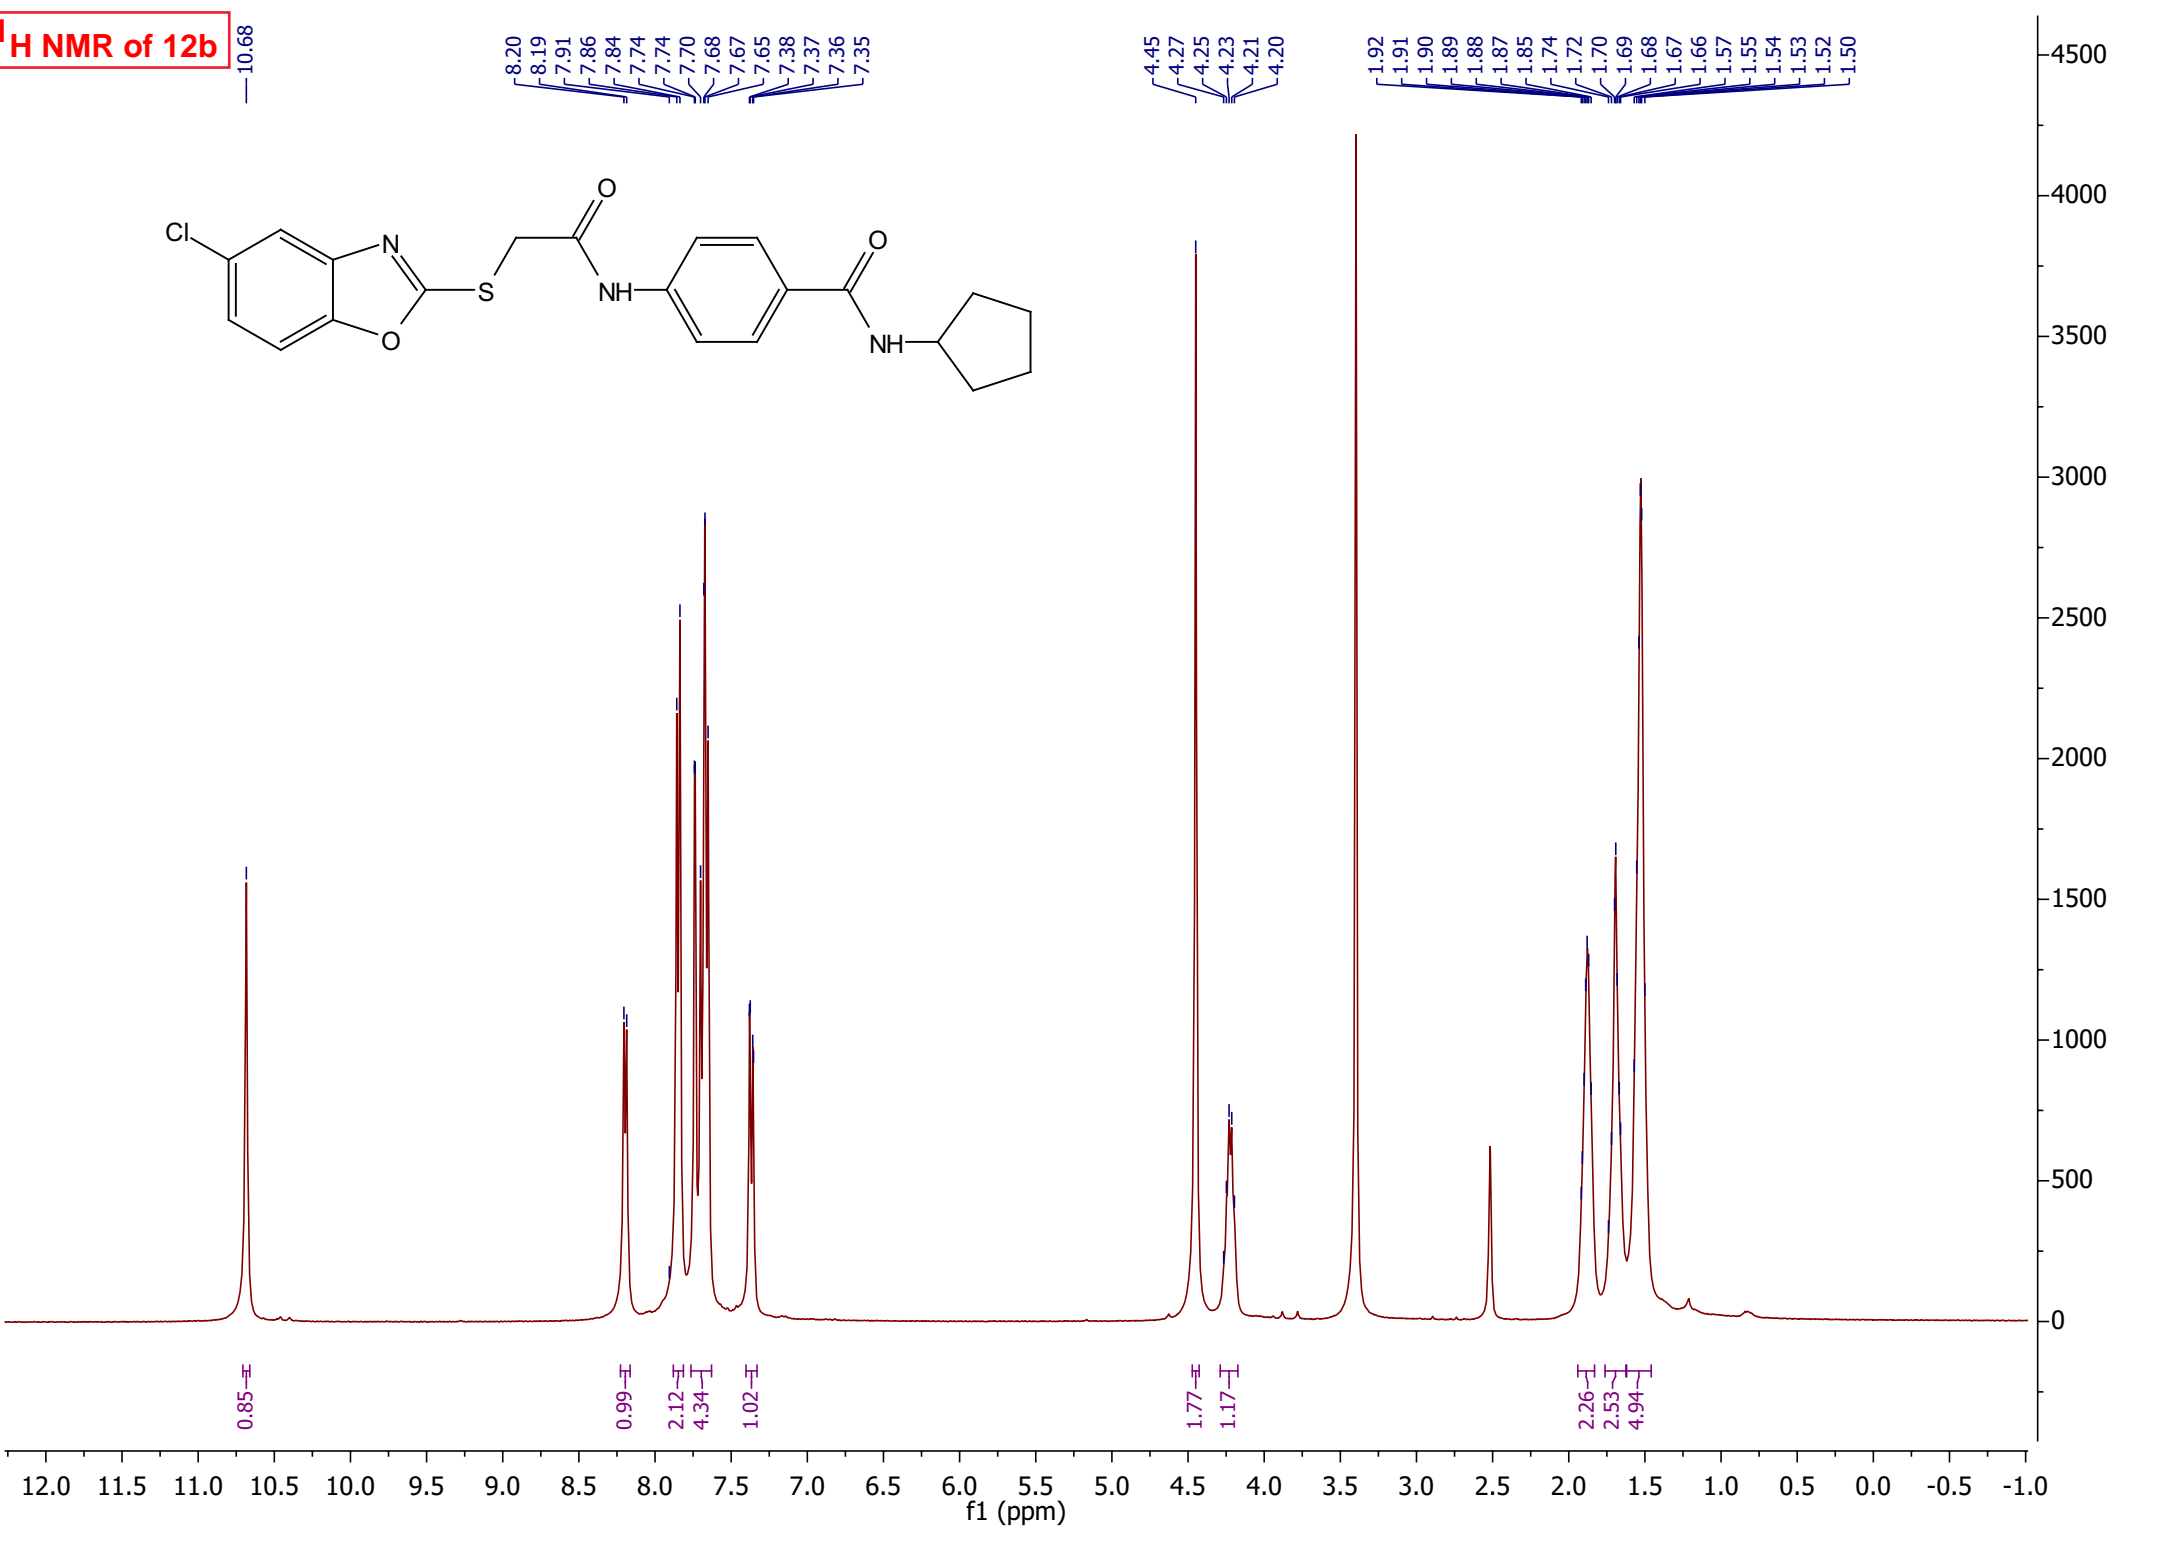

**<sup>1</sup>H NMR of 12b**

4.45  
4.27  
4.25  
4.23  
4.21  
4.20

1.92  
1.91  
1.90  
1.89  
1.88  
1.87  
1.85  
1.74  
1.72  
1.70  
1.69  
1.68  
1.67  
1.66  
1.57  
1.55  
1.54  
1.53  
1.52  
1.50

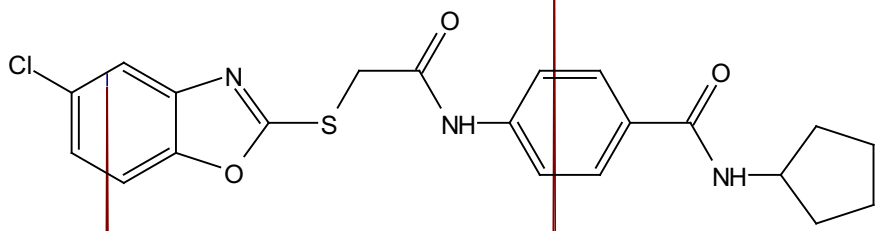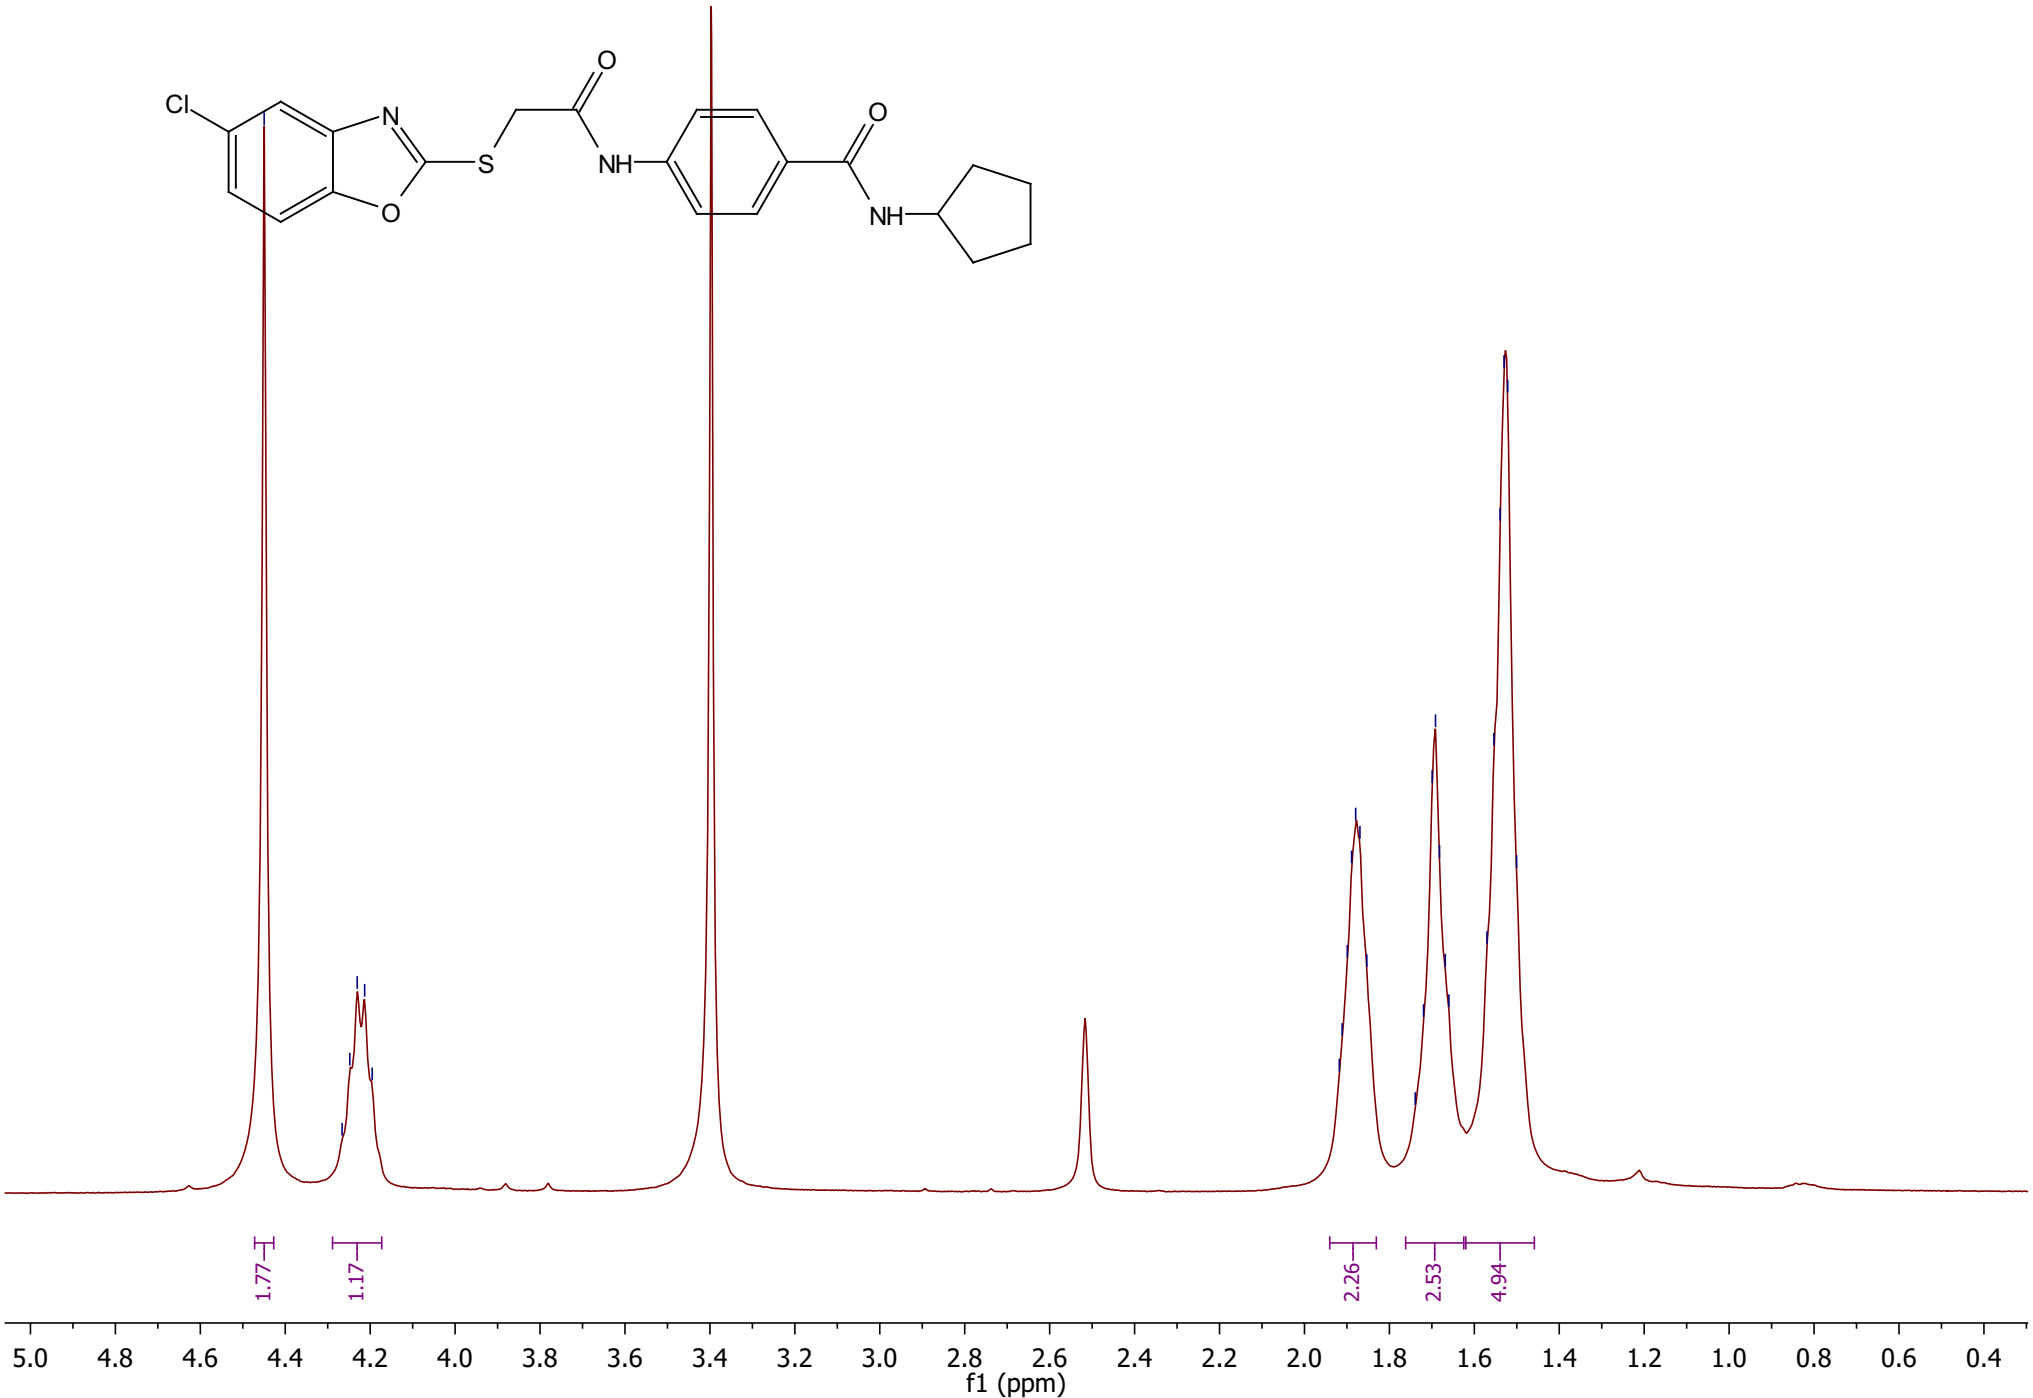



**<sup>1</sup>H NMR of 12b**

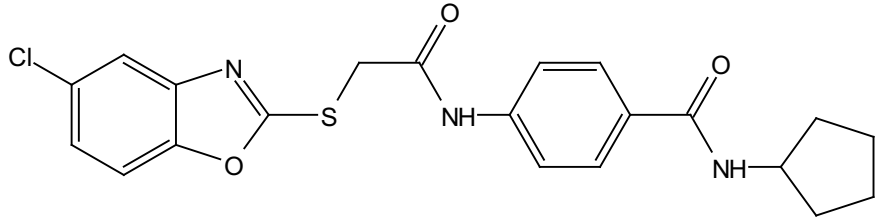

10.68

8.20  
8.19  
7.91  
7.86  
7.84  
7.74  
7.74  
7.70  
7.68  
7.67  
7.65  
7.38  
7.37  
7.36  
7.35

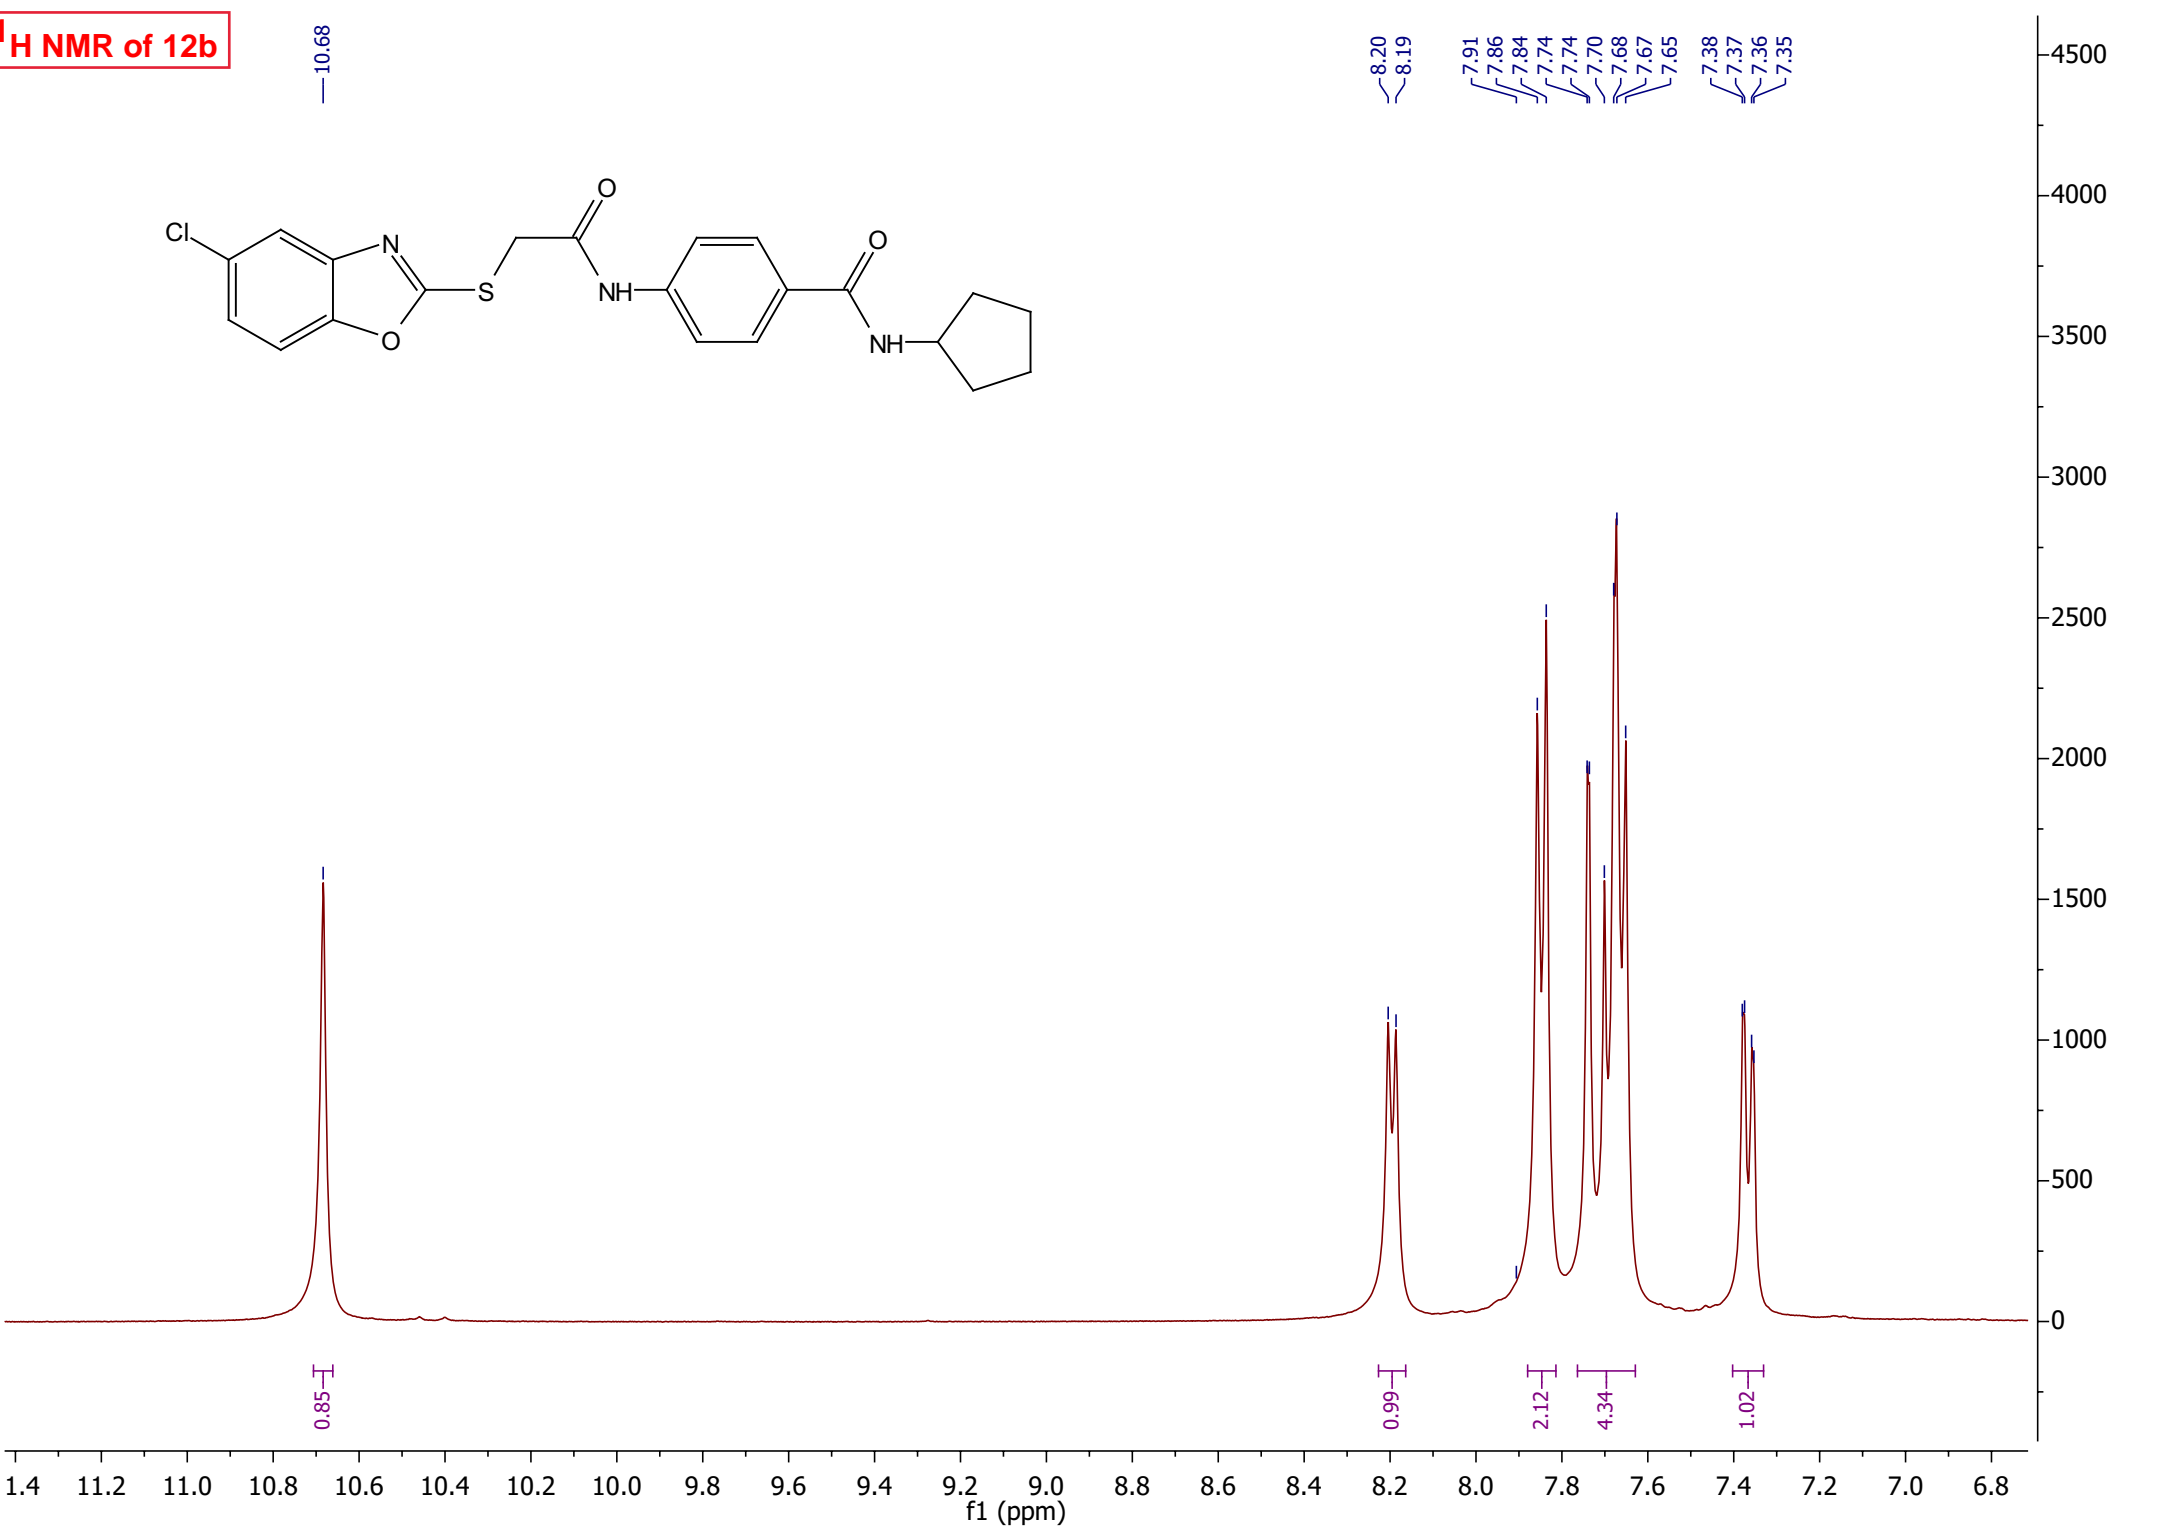

**<sup>13</sup>C NMR of 12b**

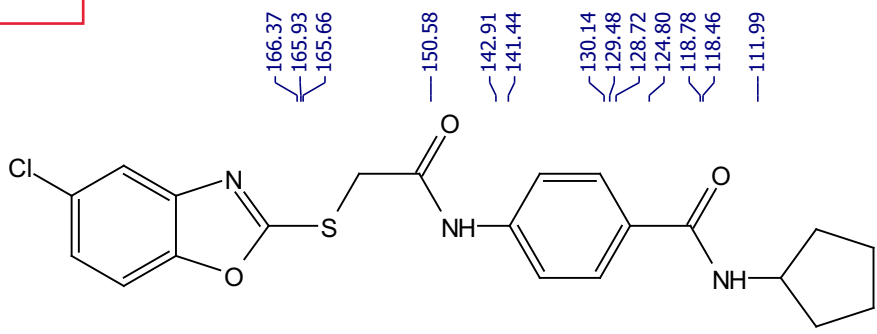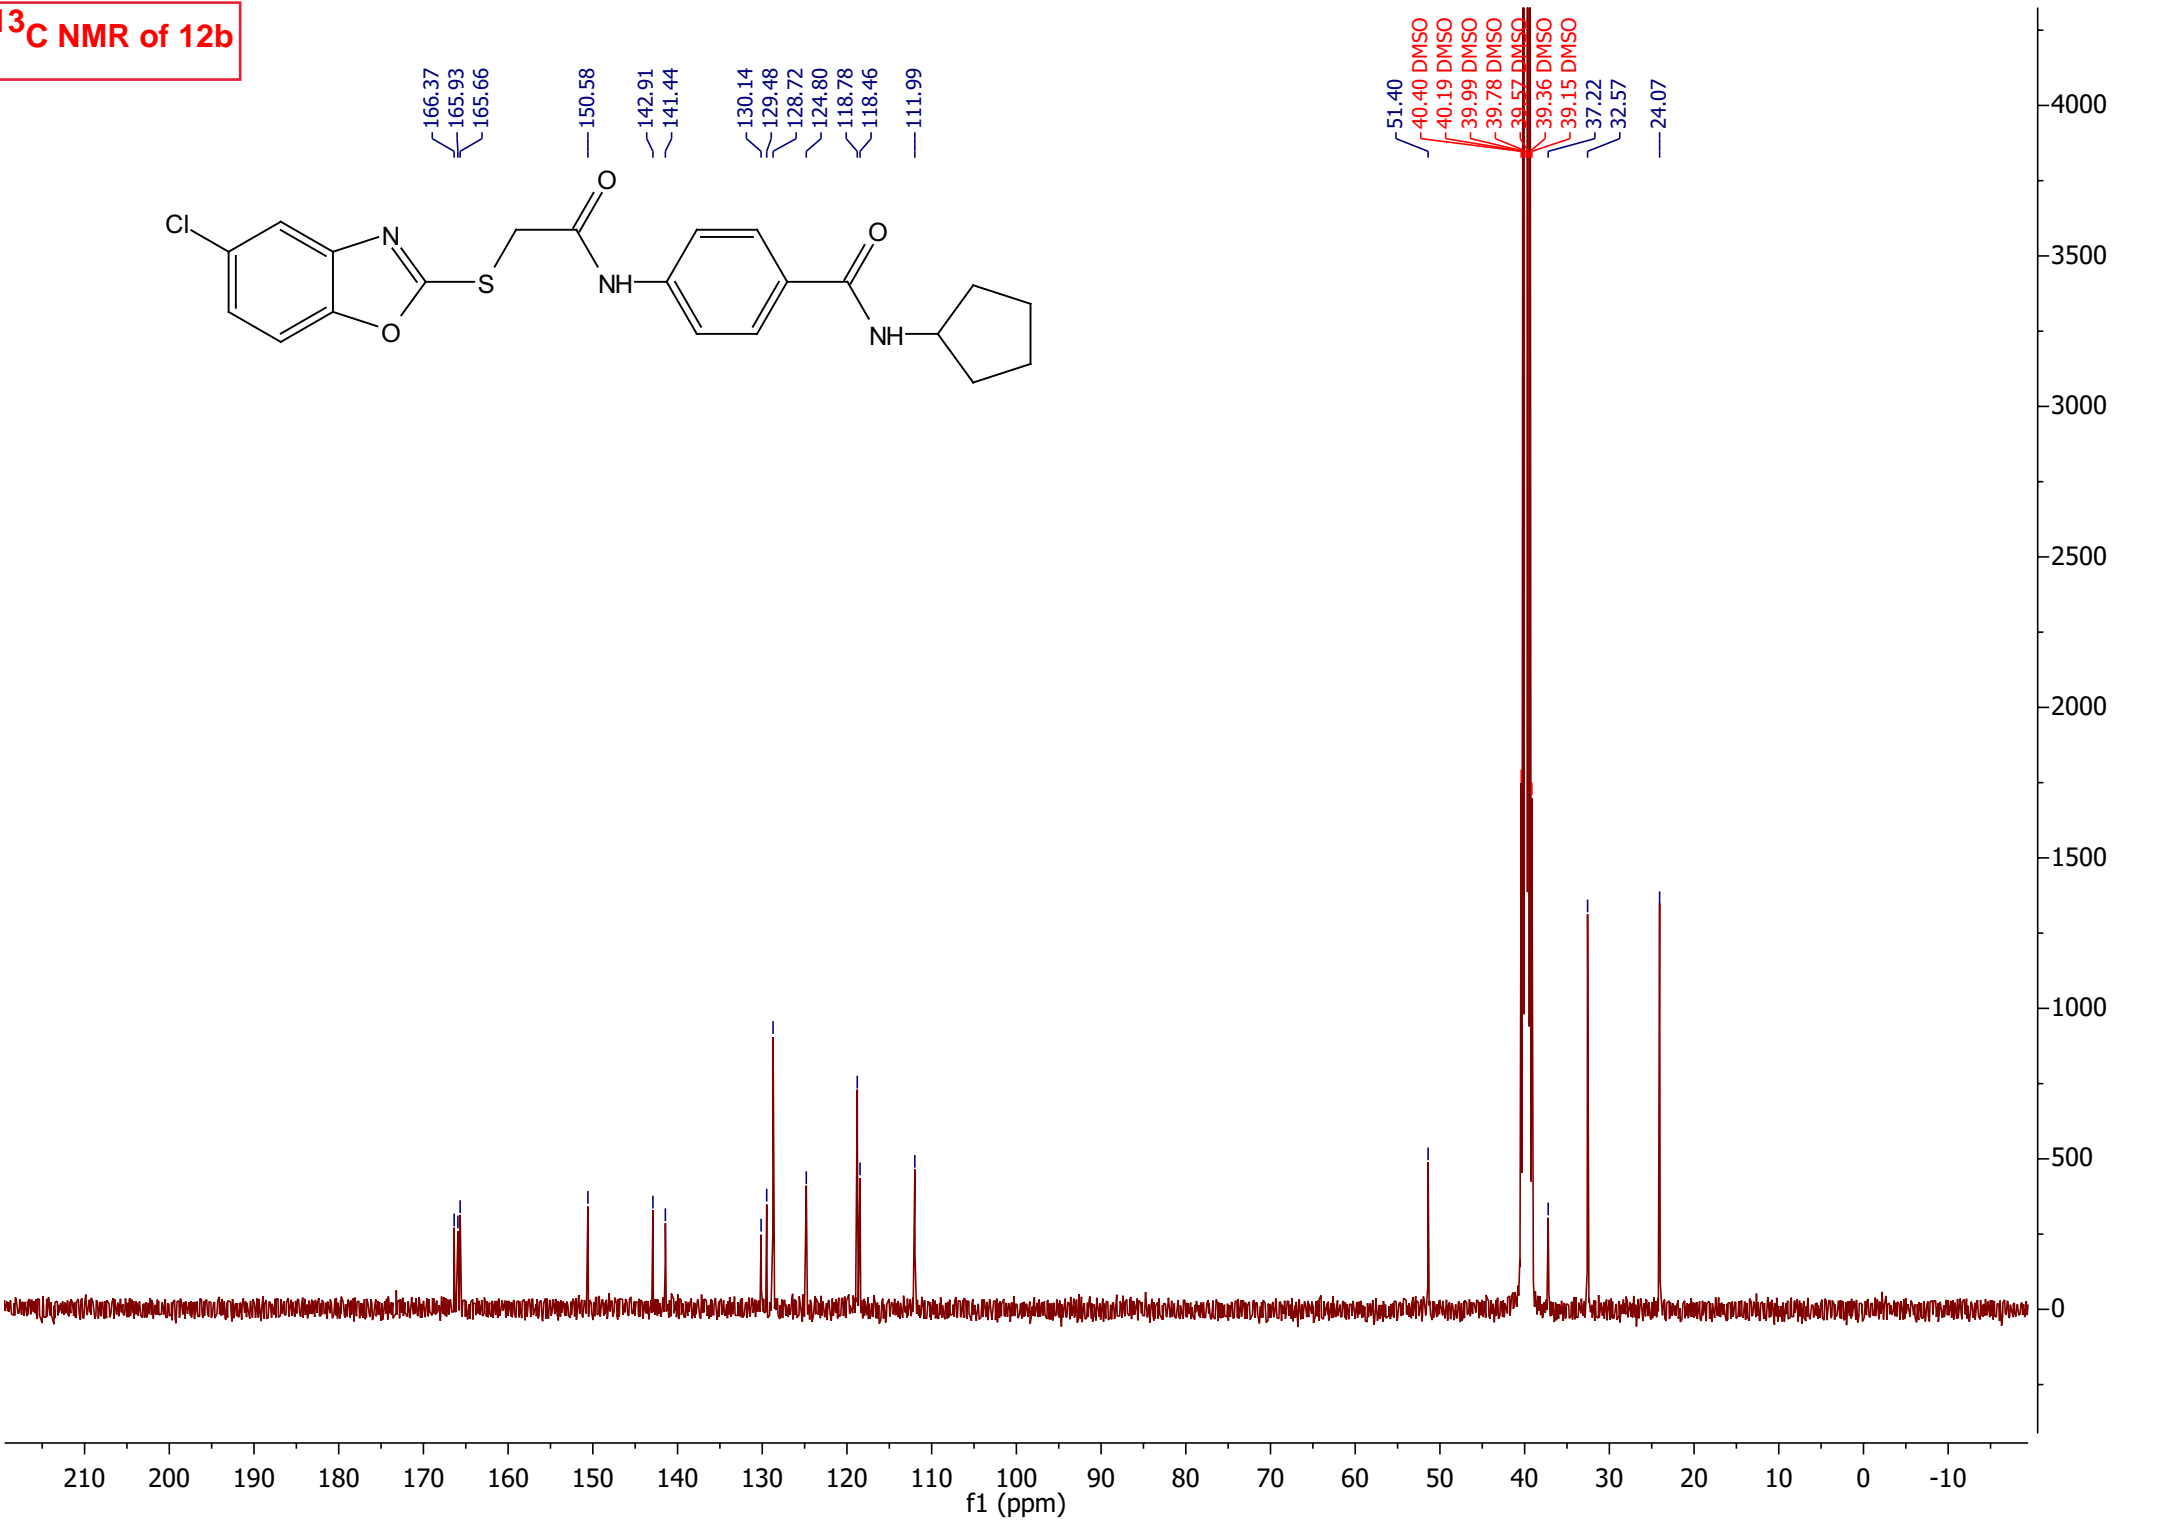

**<sup>13</sup>C NMR of 12b**

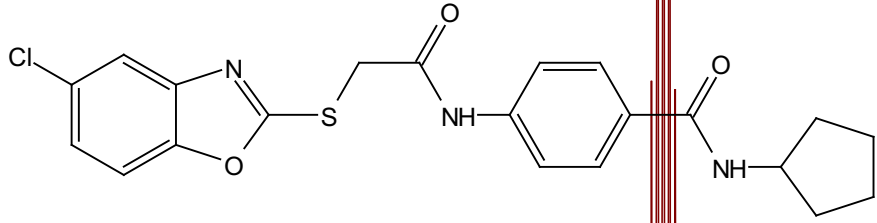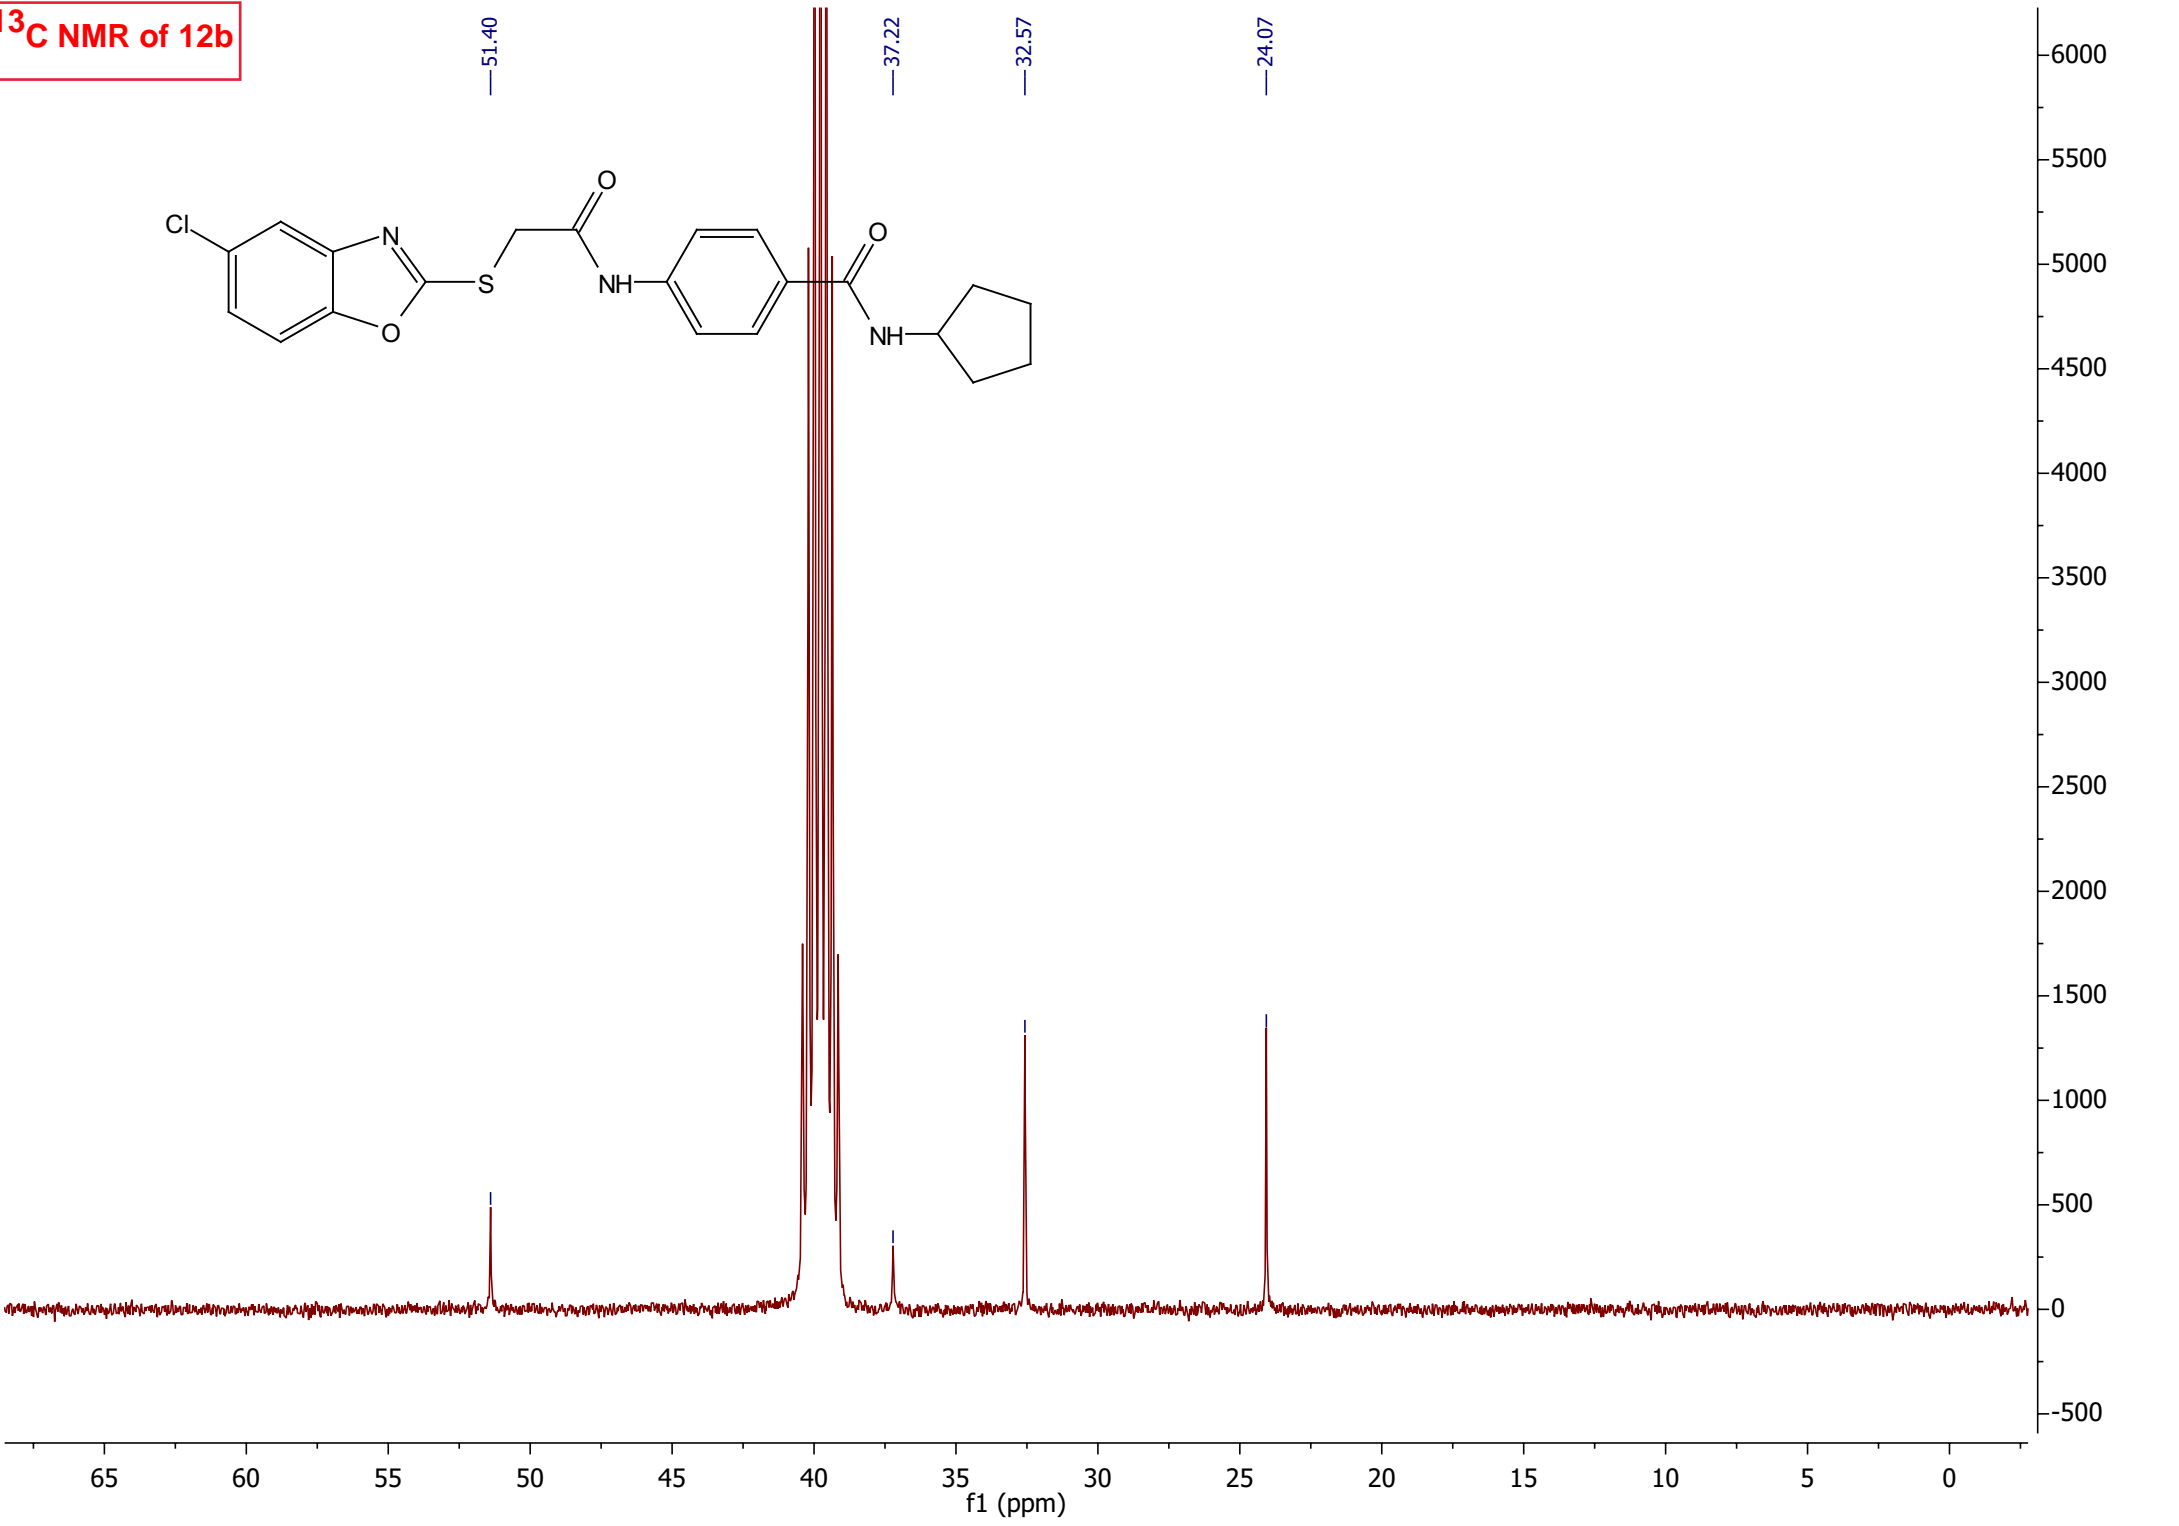

**<sup>13</sup>C NMR of 12b**

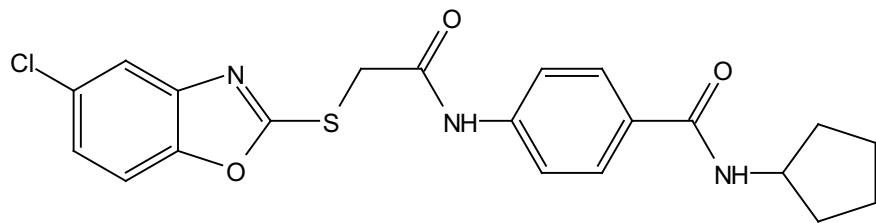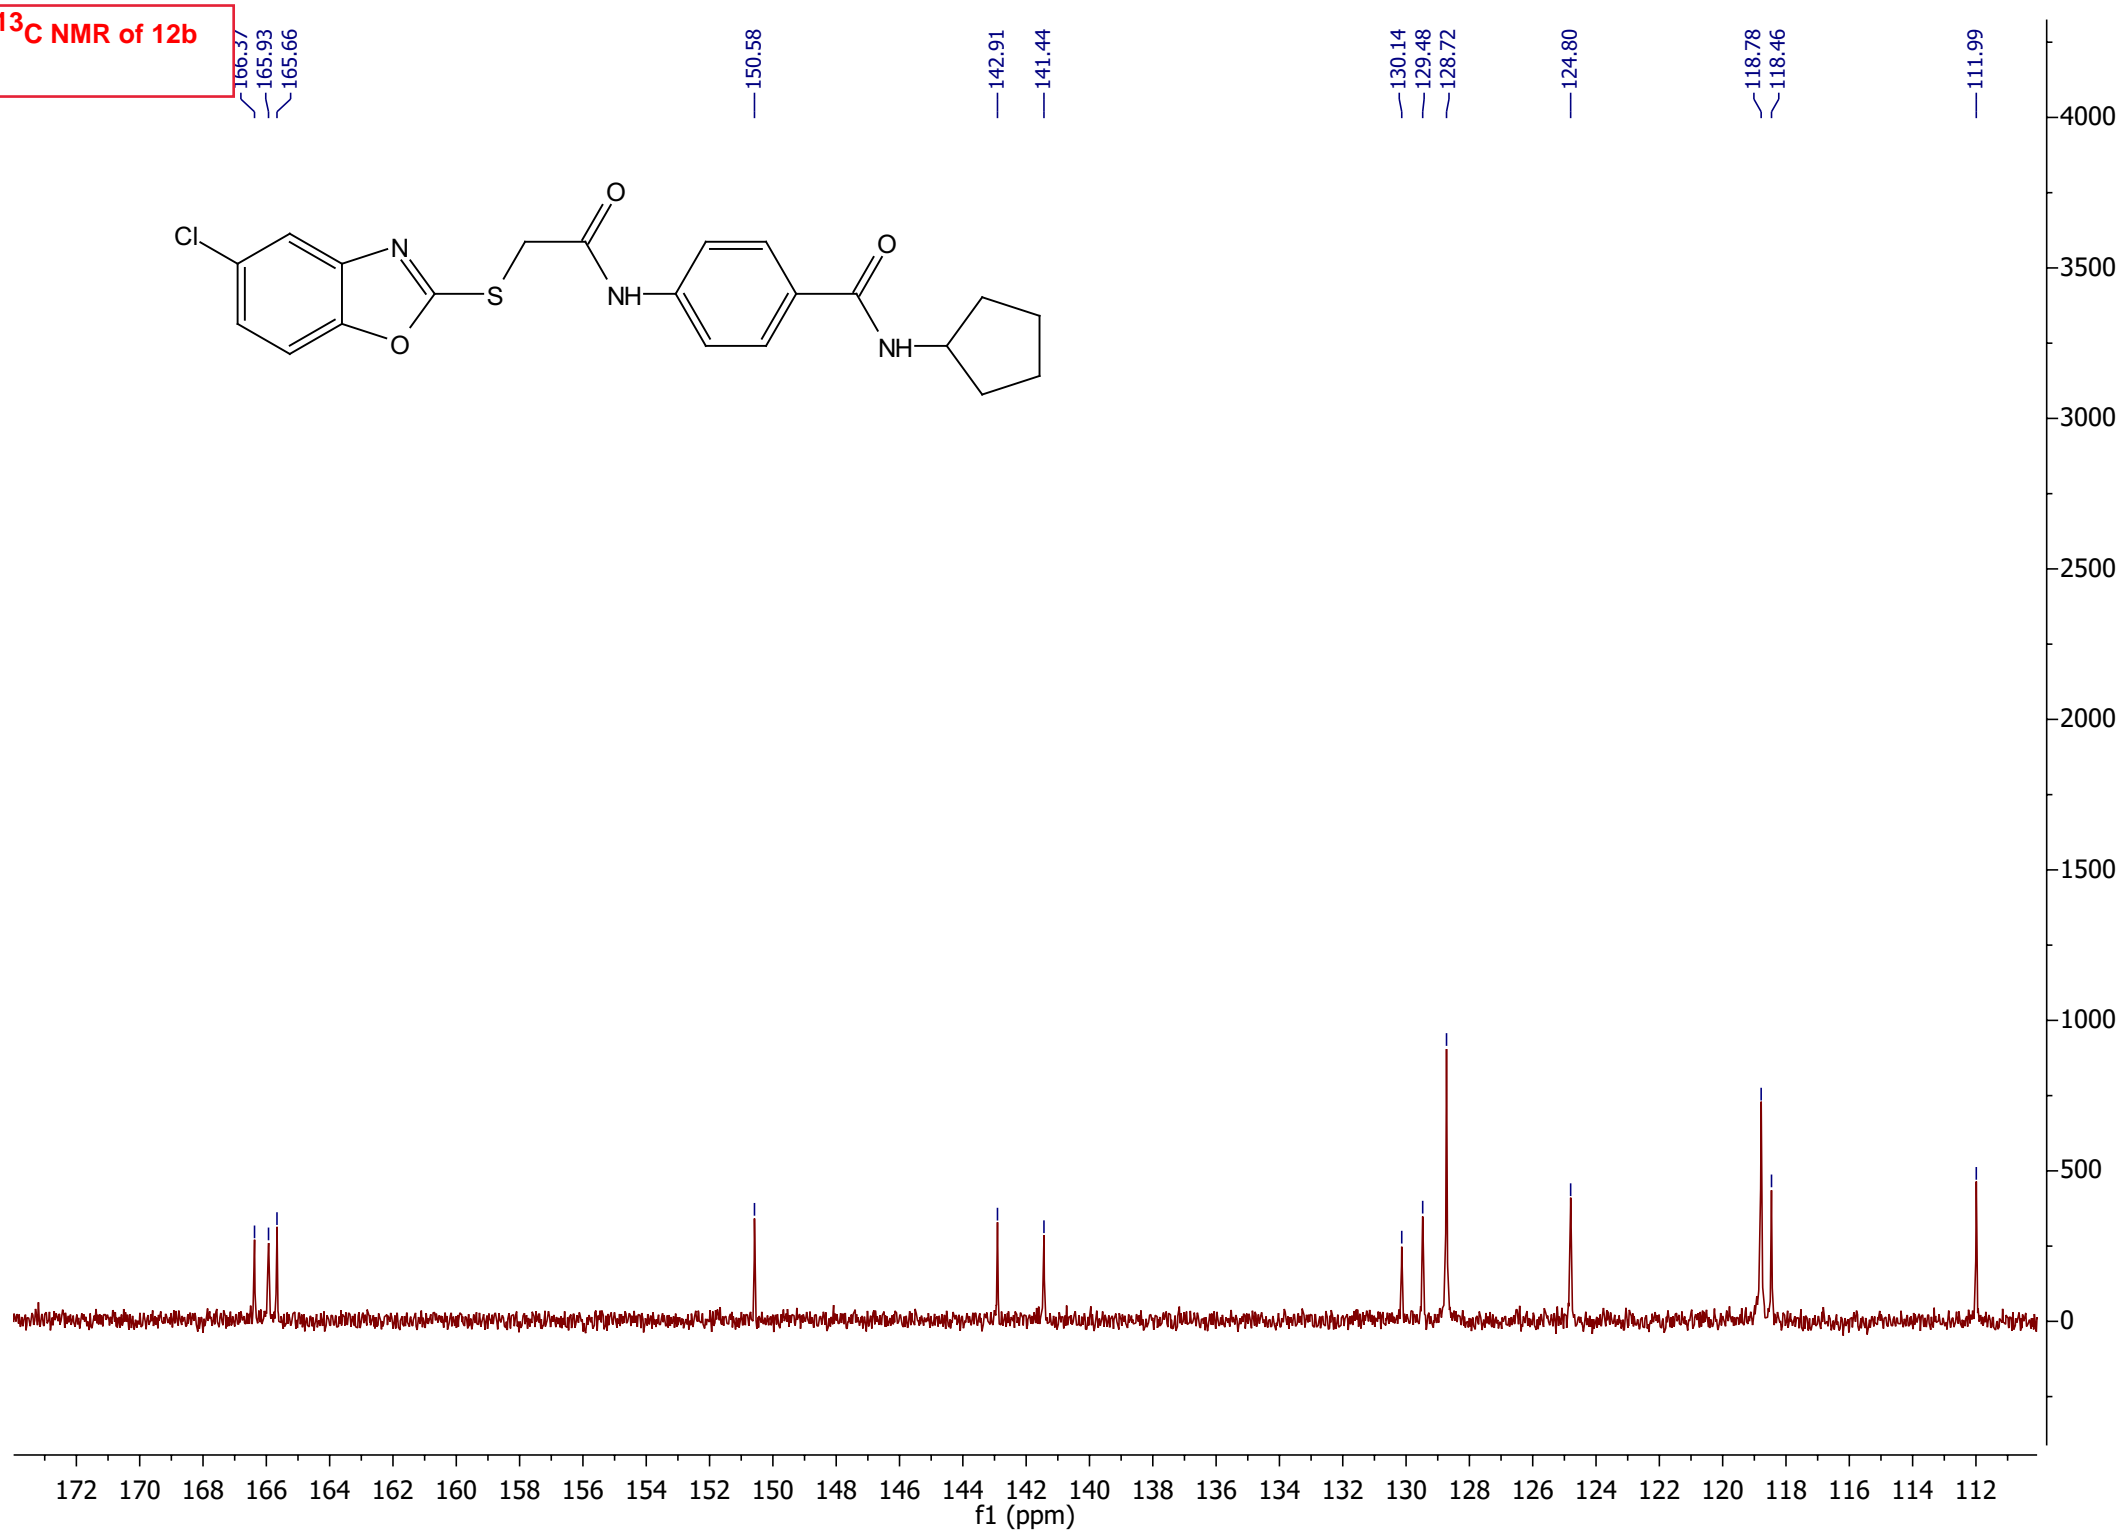

# IR Of Comp. 12c

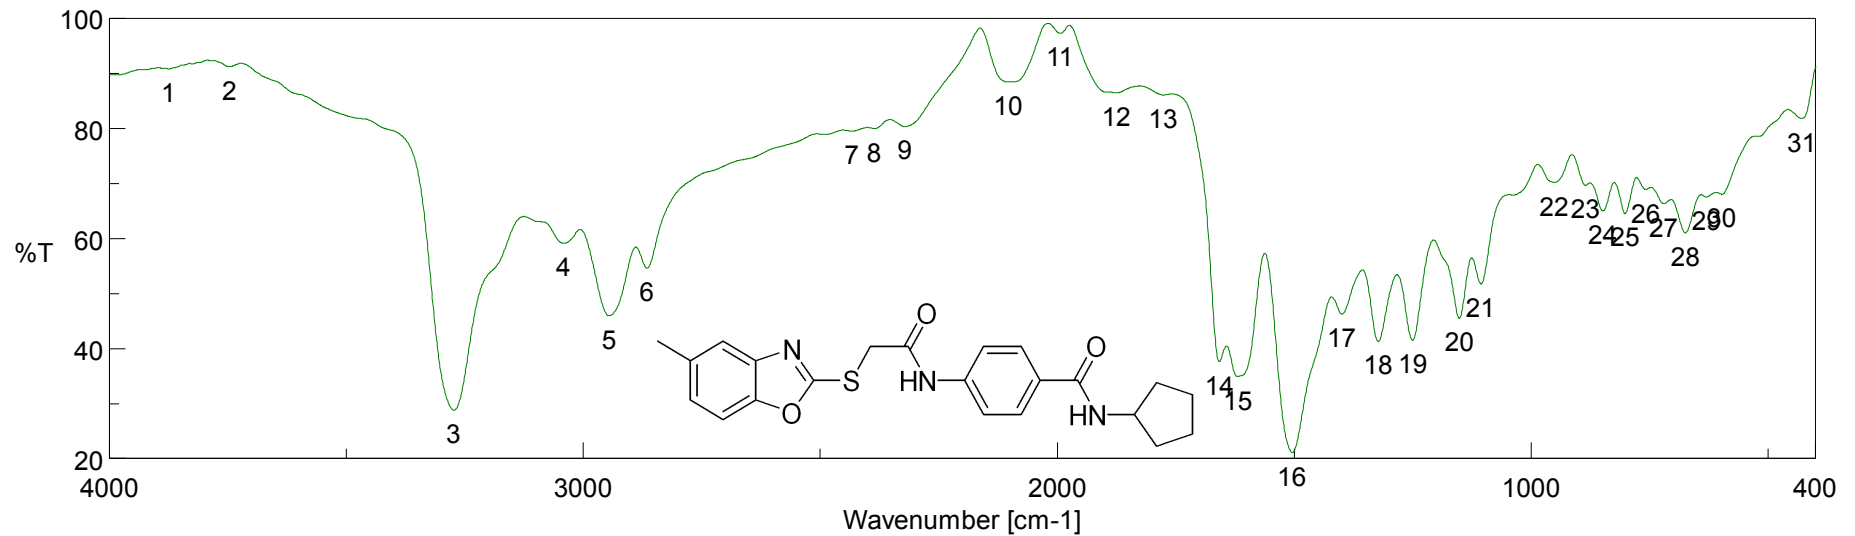

### [ Result of Peak Picking ]

| No. | Position | Intensity | No. | Position | Intensity | No. | Position | Intensity | No. | Position | Intensity |
|-----|----------|-----------|-----|----------|-----------|-----|----------|-----------|-----|----------|-----------|
| 1   | 3874.29  | 90.7946   | 2   | 3746.05  | 91.2222   | 3   | 3273.57  | 28.7813   | 4   | 3041.19  | 59.0862   |
| 5   | 2945.73  | 45.9277   | 6   | 2865.7   | 54.5587   | 7   | 2433.73  | 79.4788   | 8   | 2385.51  | 79.9466   |
| 9   | 2320.91  | 80.3389   | 10  | 2102.99  | 88.4413   | 11  | 1994.03  | 97.25     | 12  | 1874.47  | 86.4445   |
| 13  | 1776.12  | 86.0541   | 14  | 1657.52  | 37.5794   | 15  | 1618.95  | 34.9054   | 16  | 1504.2   | 21.0482   |
| 17  | 1399.1   | 46.2319   | 18  | 1322.93  | 41.2278   | 19  | 1249.65  | 41.4699   | 20  | 1151.29  | 45.4441   |
| 21  | 1105.98  | 51.7113   | 22  | 950.734  | 70.1569   | 23  | 885.166  | 69.6454   | 24  | 848.525  | 64.971    |
| 25  | 801.278  | 64.4858   | 26  | 757.888  | 68.8886   | 27  | 719.318  | 66.3373   | 28  | 673.999  | 60.9708   |
| 29  | 629.644  | 67.5269   | 30  | 596.861  | 67.9861   | 31  | 428.12   | 81.7825   |     |          |           |

**<sup>1</sup>H NMR of 12c**

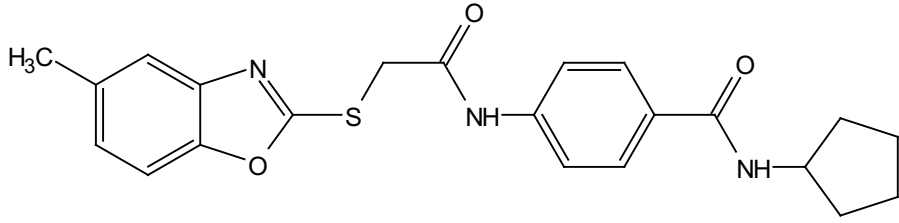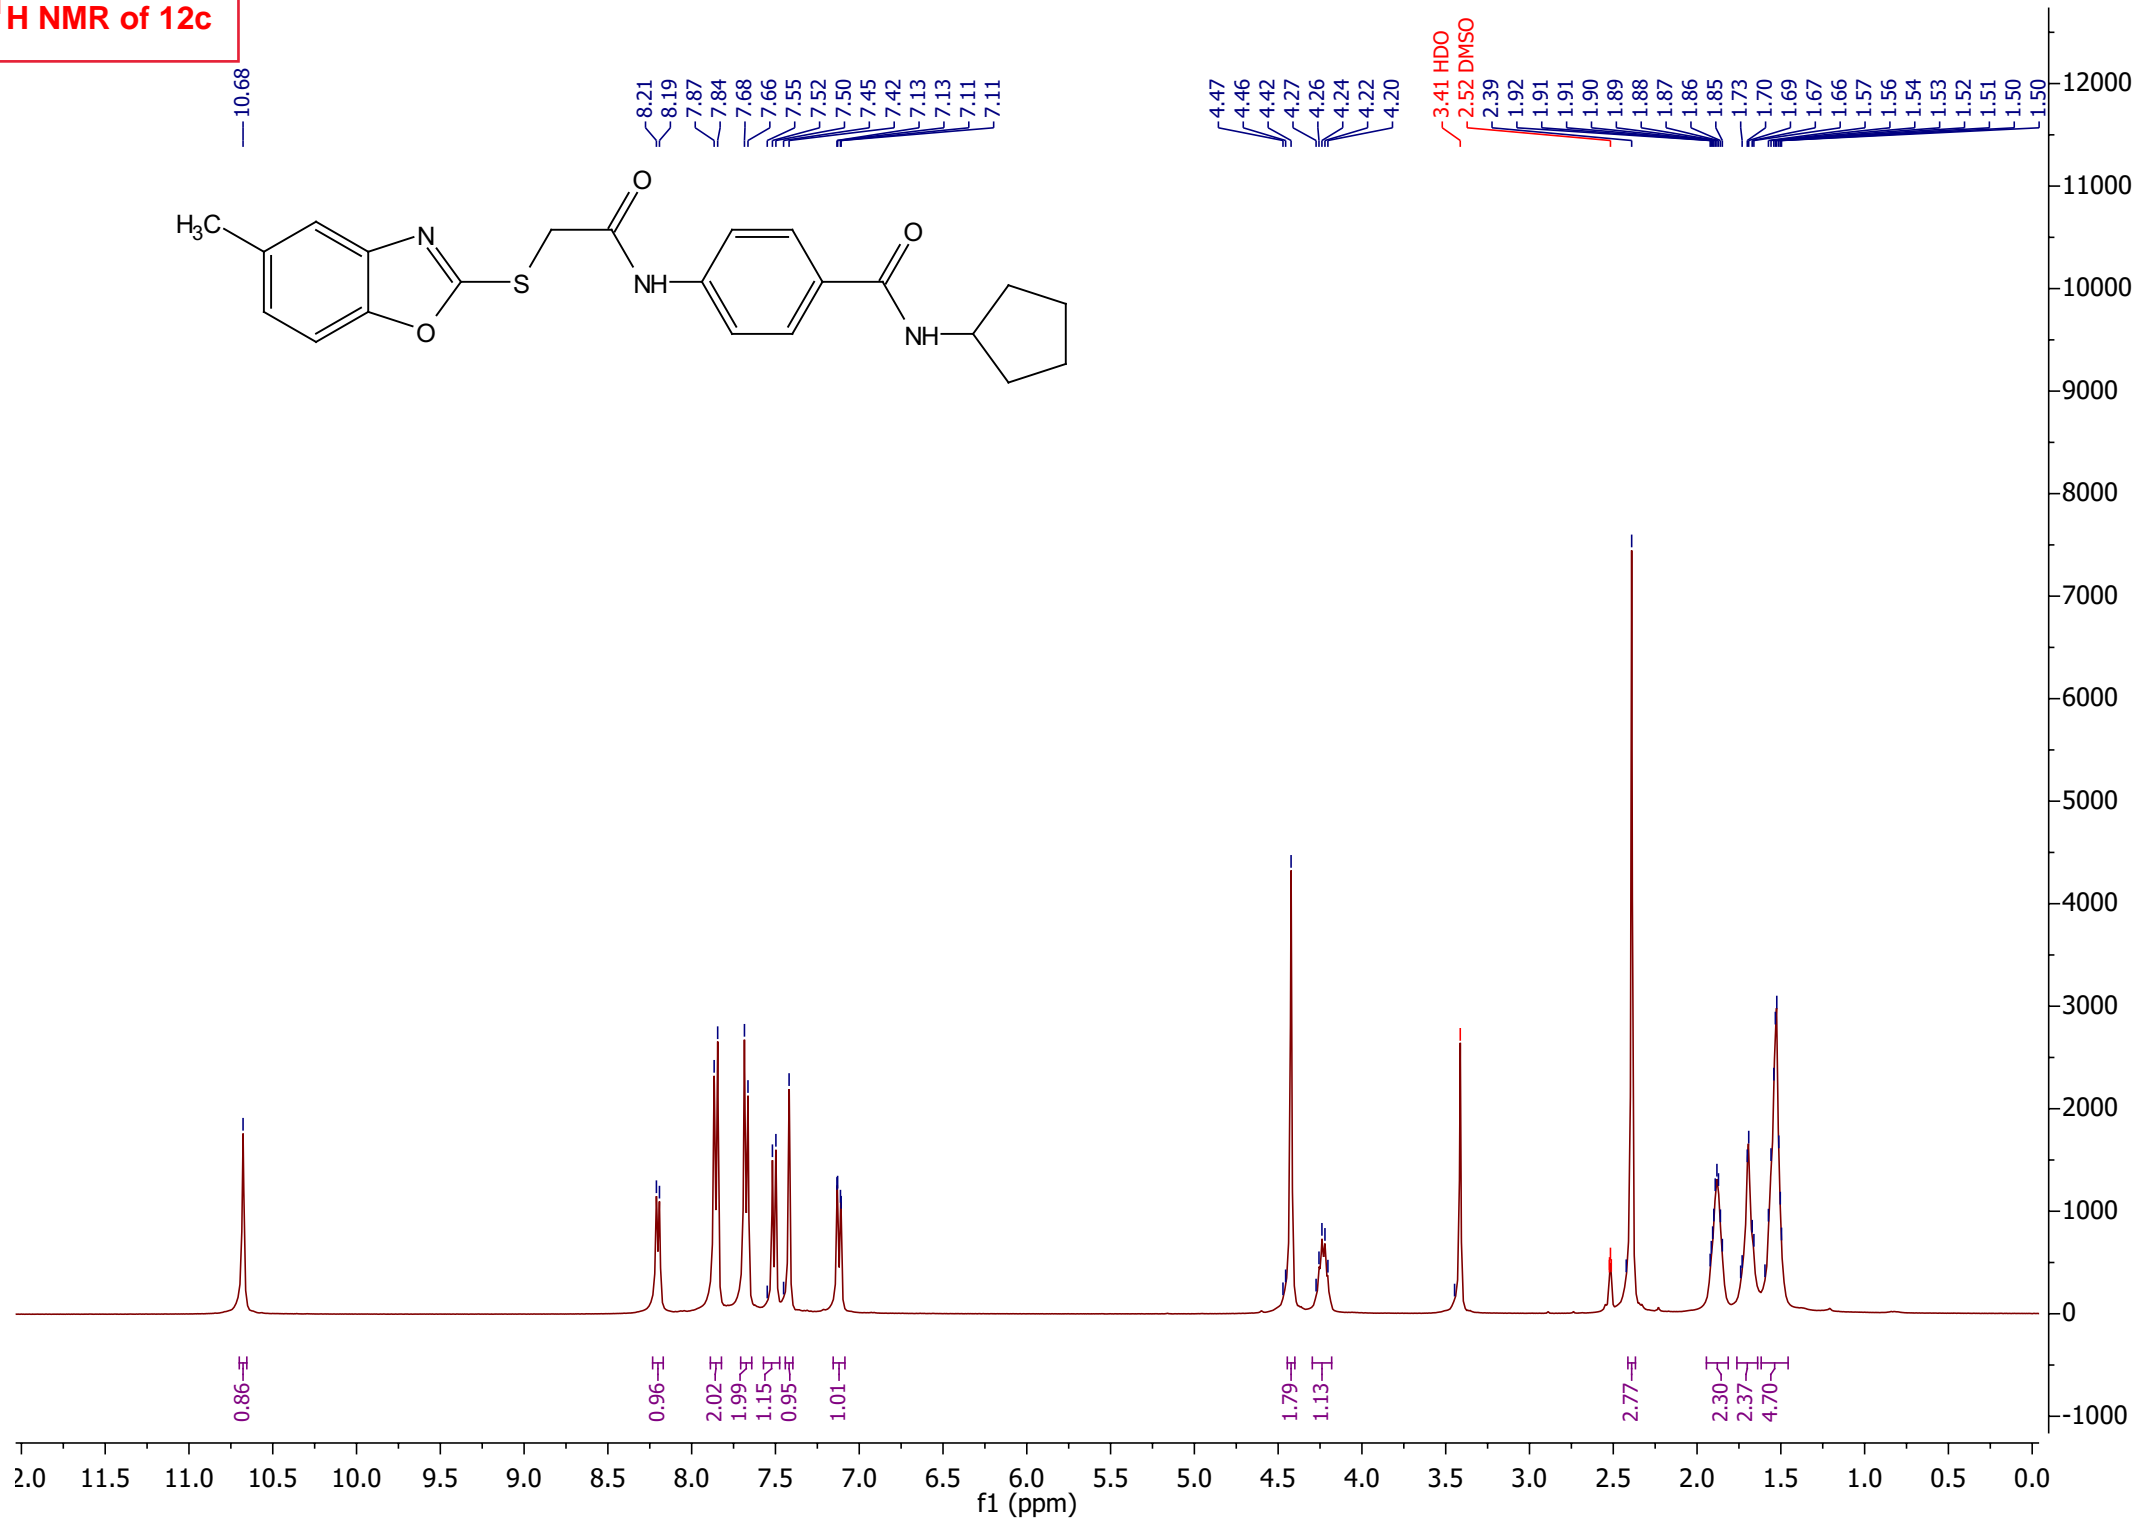

# <sup>1</sup>H NMR of 12c



4.47  
4.46  
4.42  
4.27  
4.26  
4.24  
4.22  
4.20

3.45  
3.41 H<sub>2</sub>O

2.52 DMSO  
2.52 DMSO  
2.52 DMSO  
2.51 DMSO  
2.42  
2.39  
1.92  
1.91  
1.91  
1.90  
1.89  
1.88  
1.87  
1.86  
1.85  
1.74  
1.73  
1.70  
1.69  
1.67  
1.66  
1.59  
1.57  
1.56  
1.54  
1.53  
1.52  
1.51  
1.50

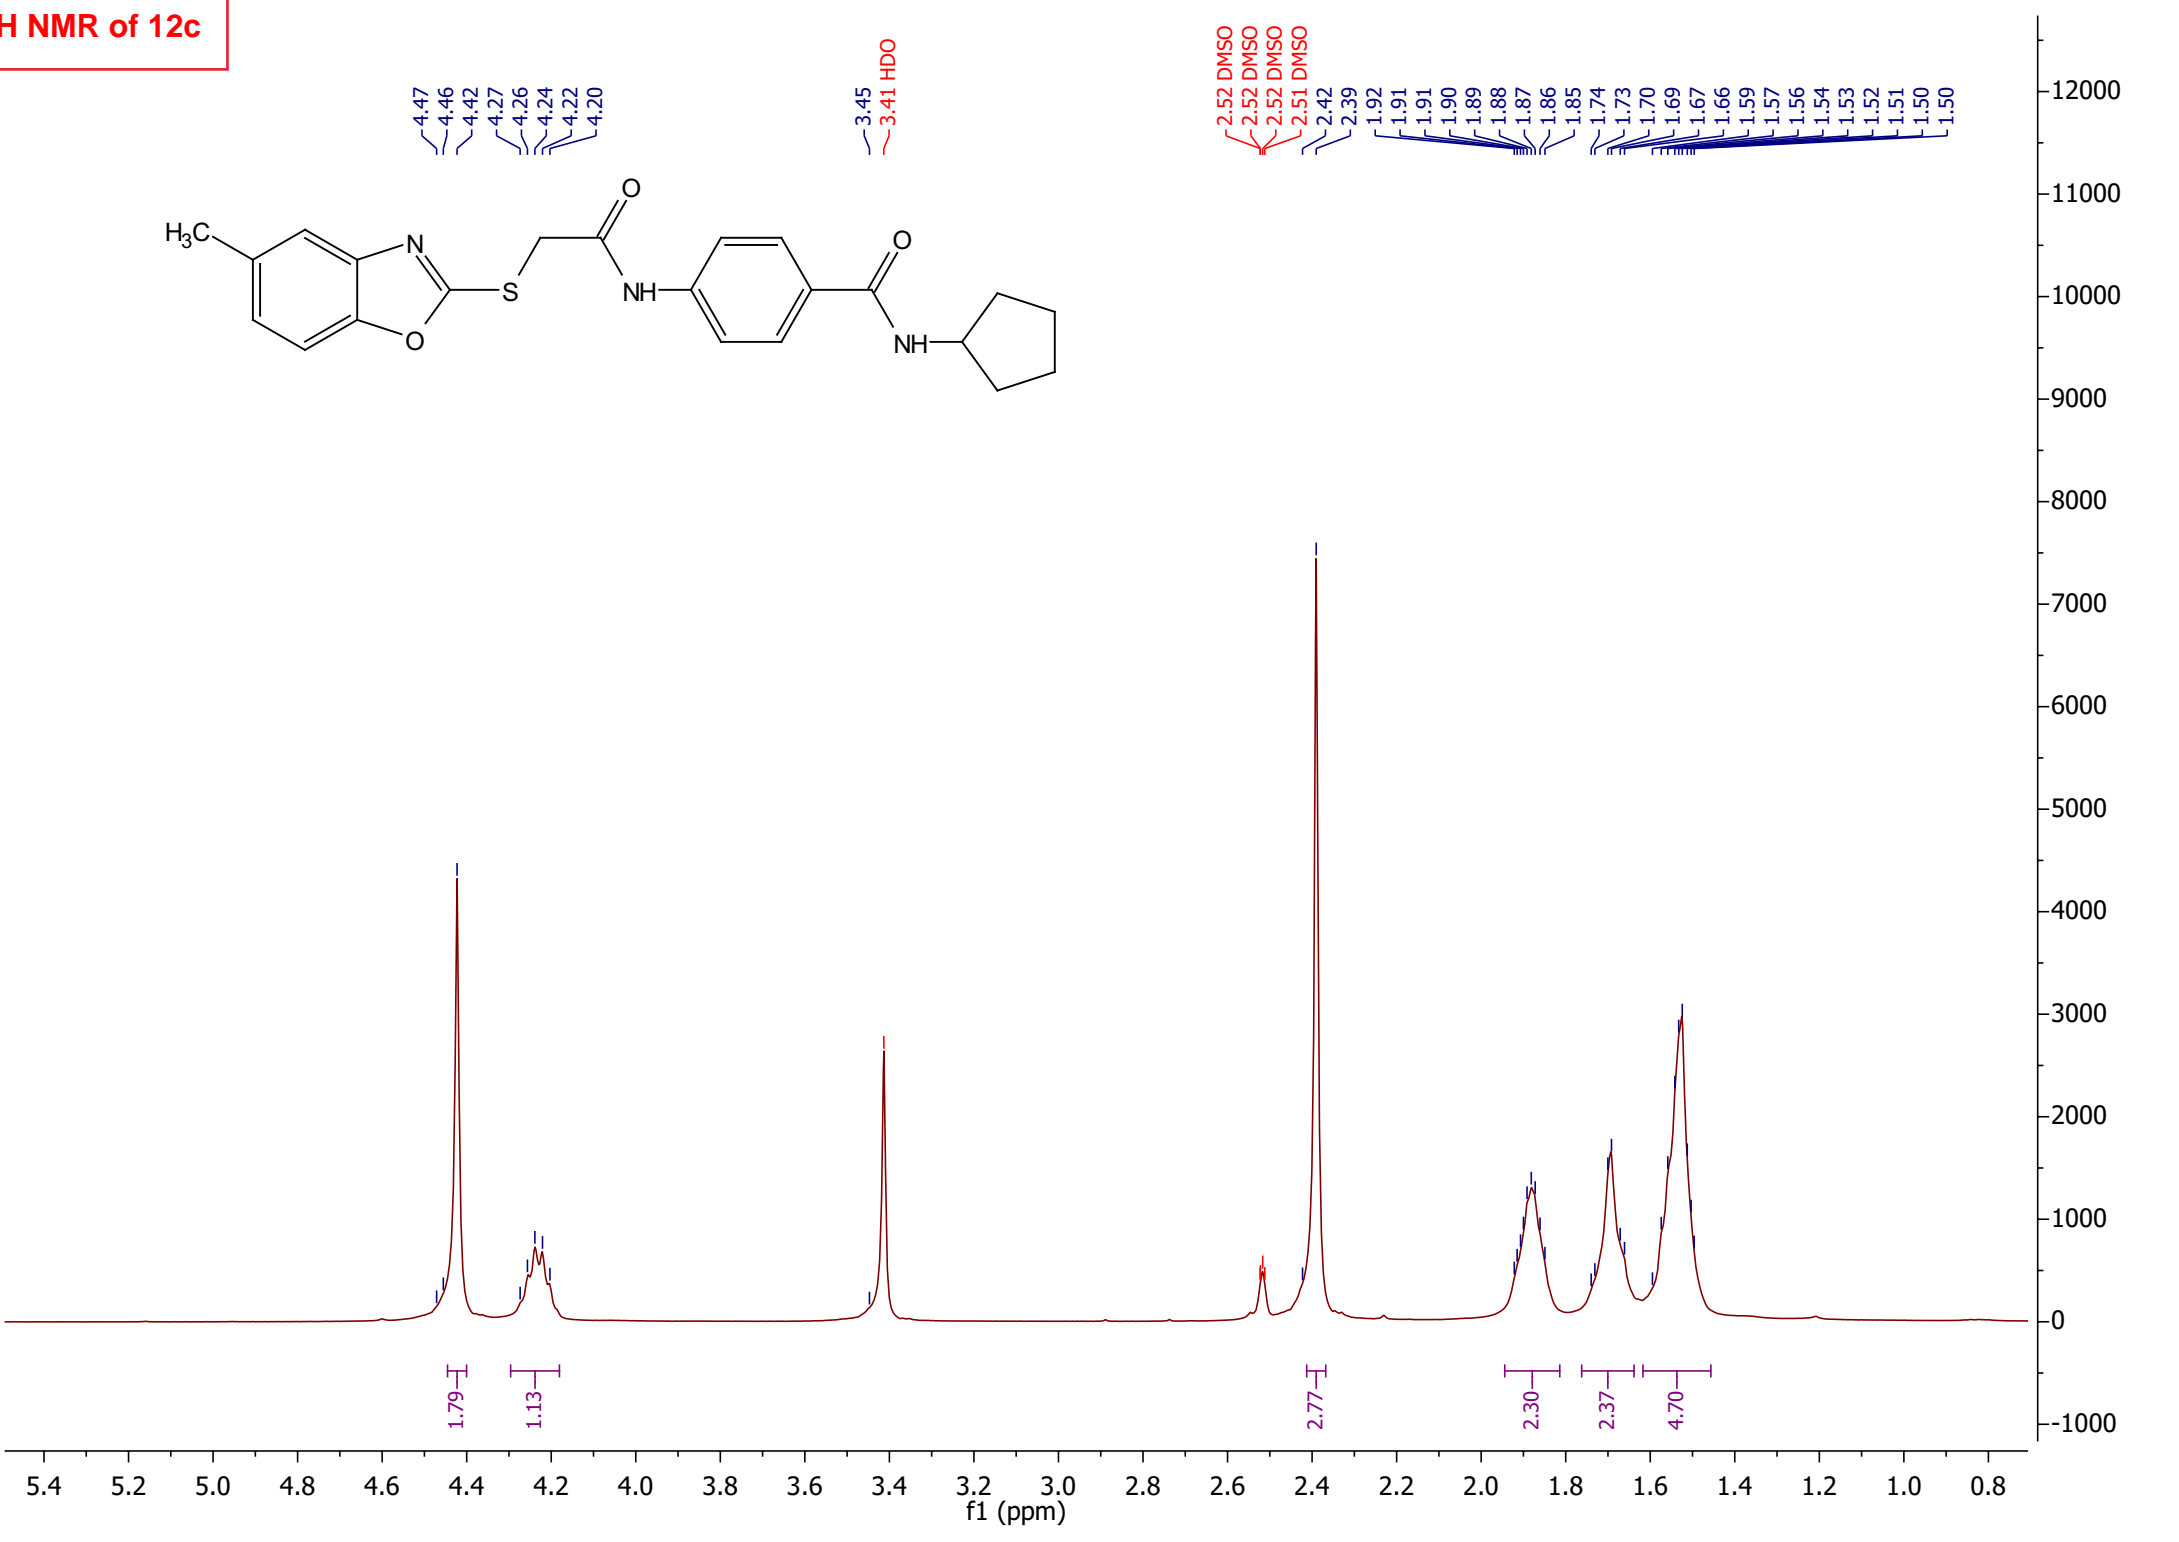

<sup>1</sup>H NMR MBA20

10.68

<sup>1</sup>H NMR of 12c

8.21  
8.19

7.87  
7.84

7.68  
7.66

7.55  
7.52

7.50  
7.45  
7.42

7.13  
7.13  
7.11  
7.11

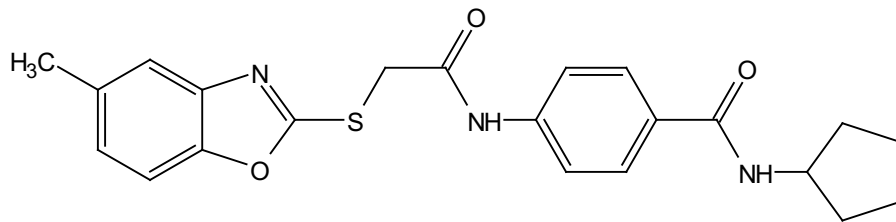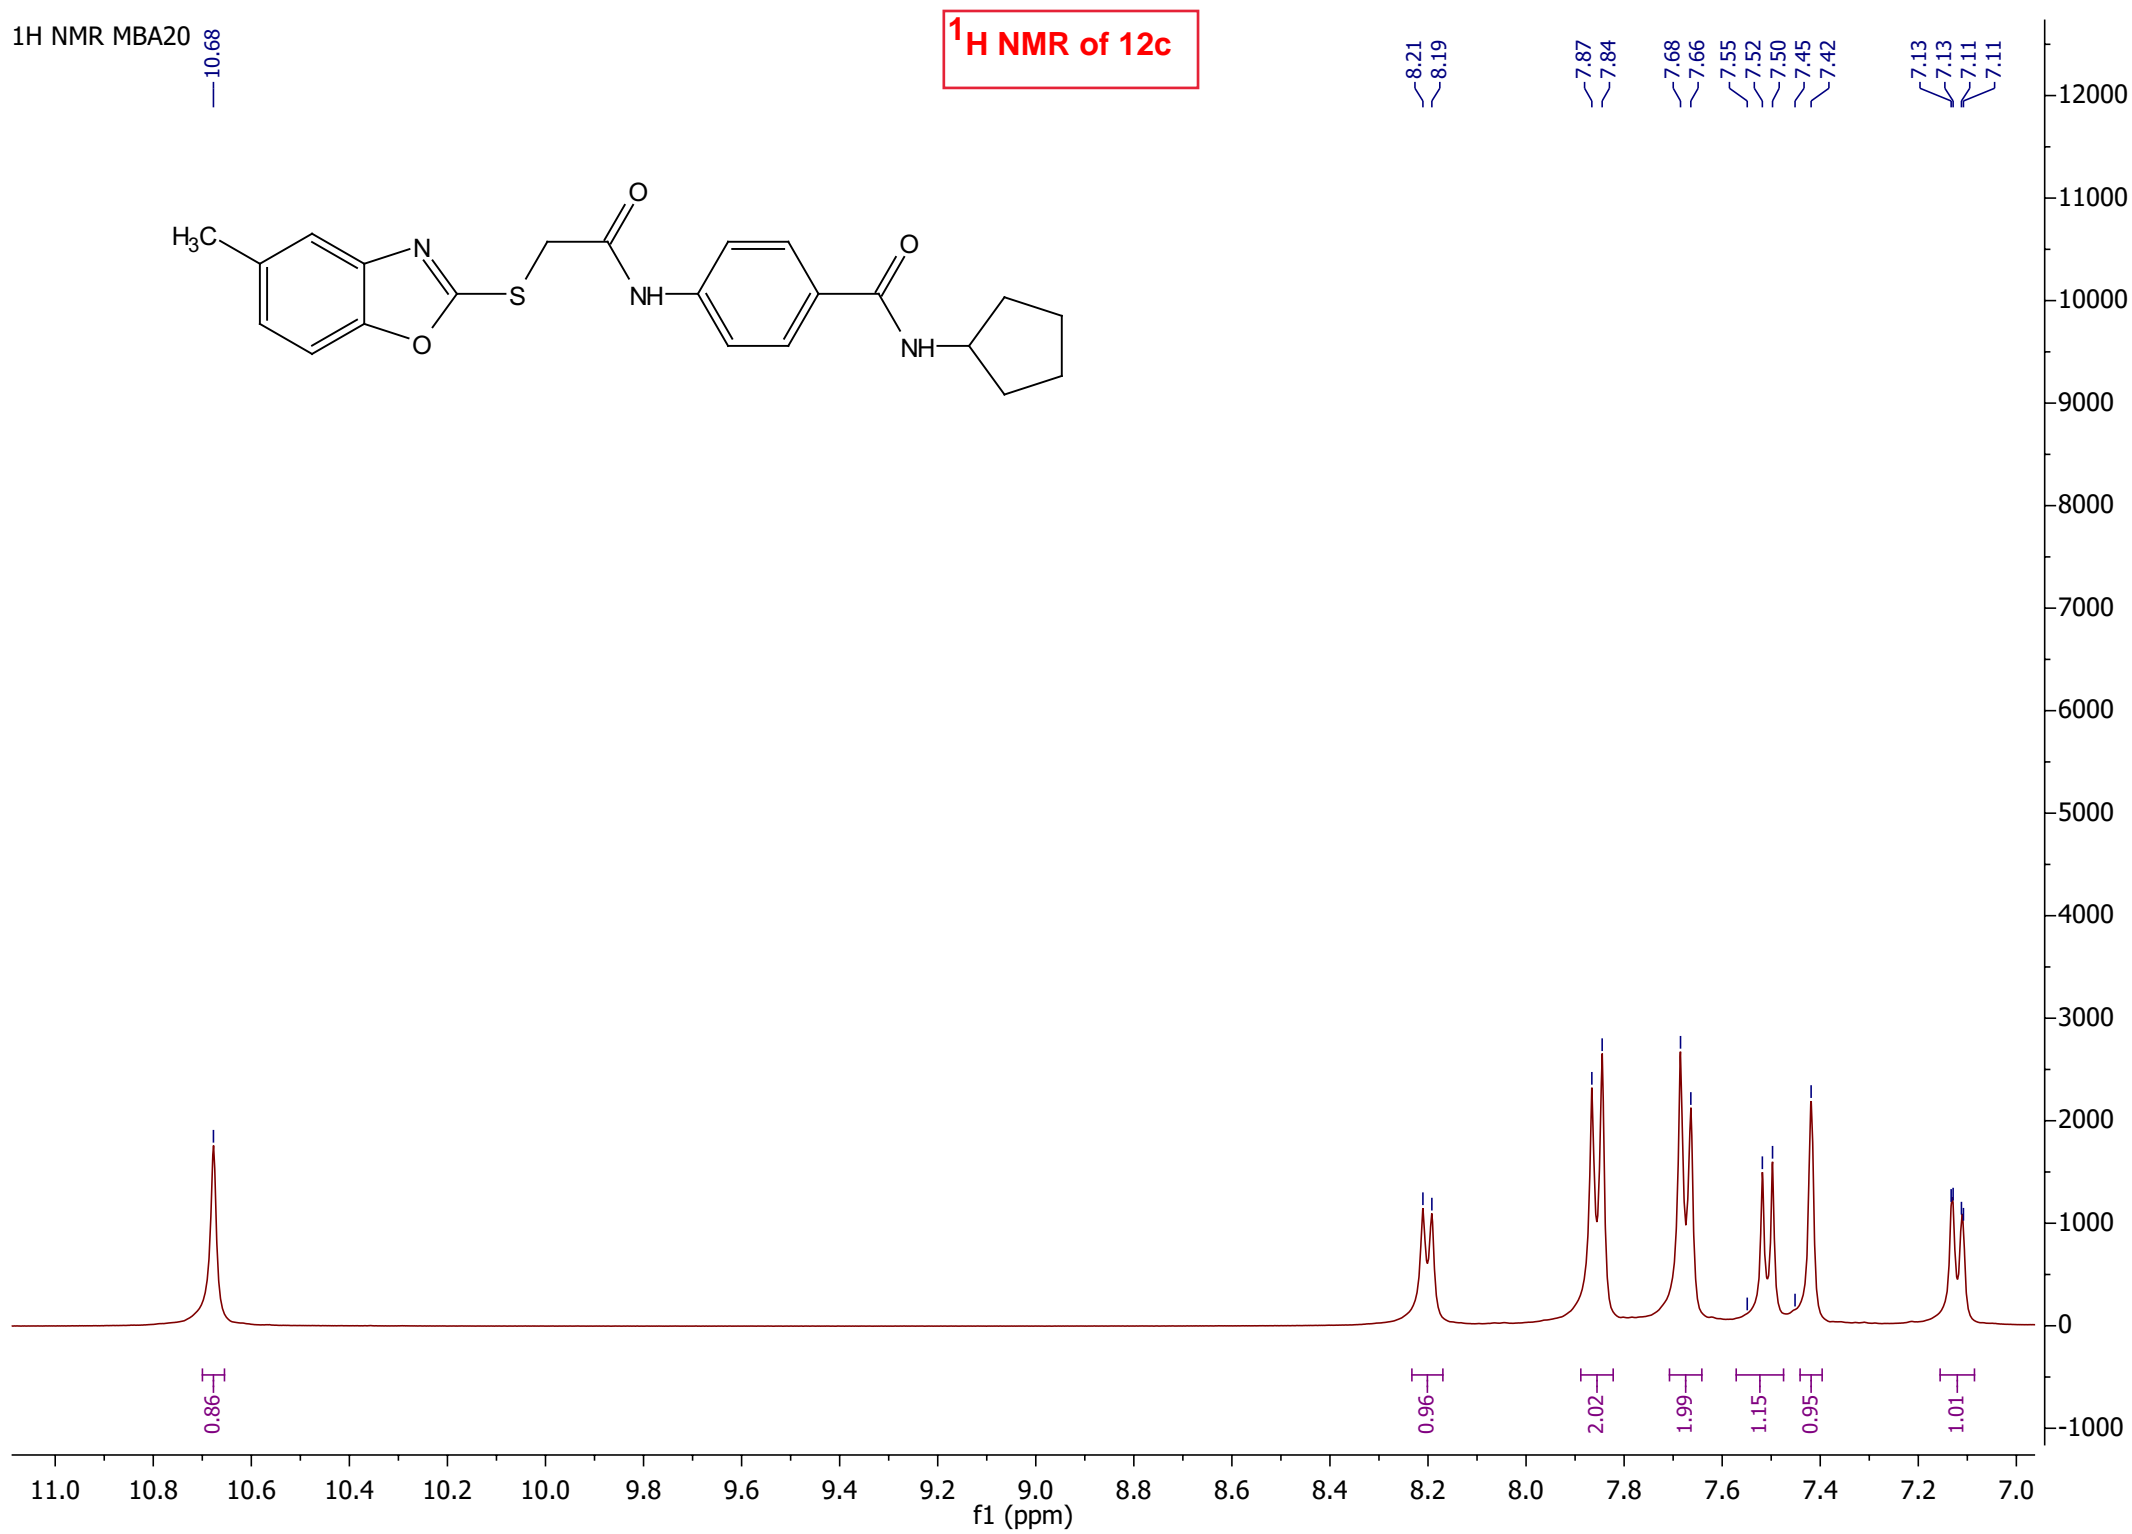



# <sup>13</sup>C NMR of 12c

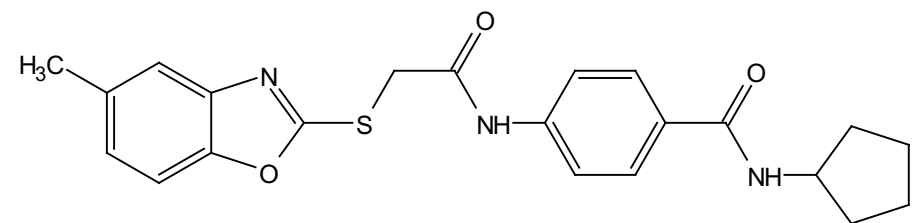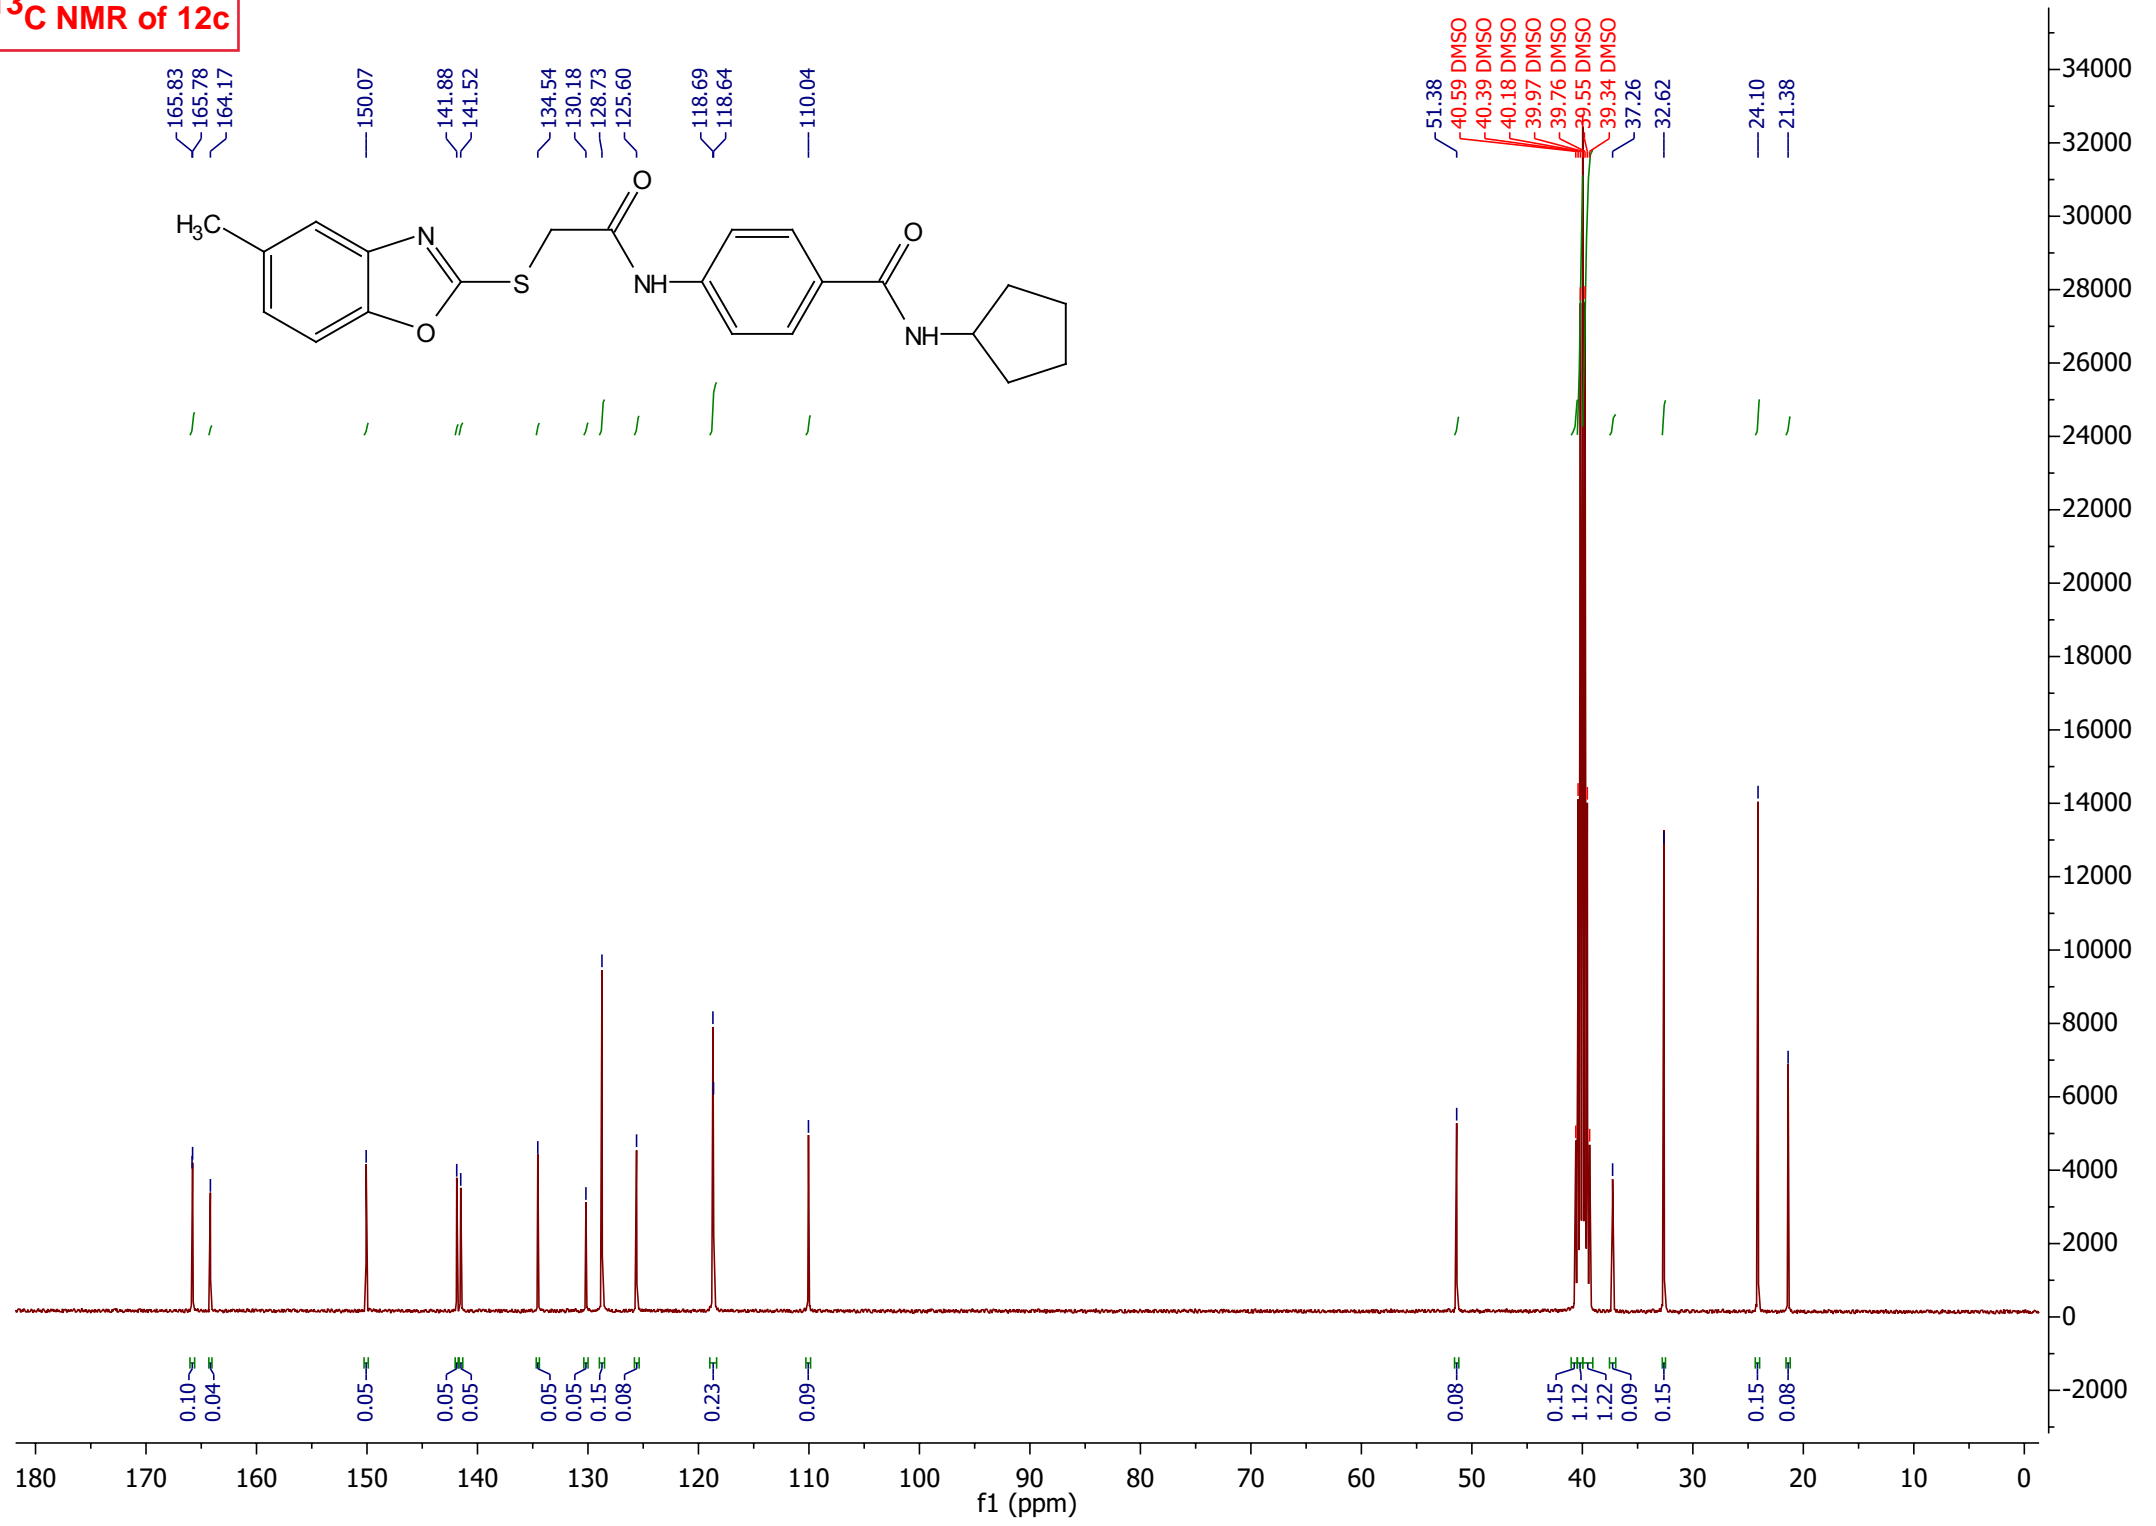

# <sup>13</sup>C NMR of 12c

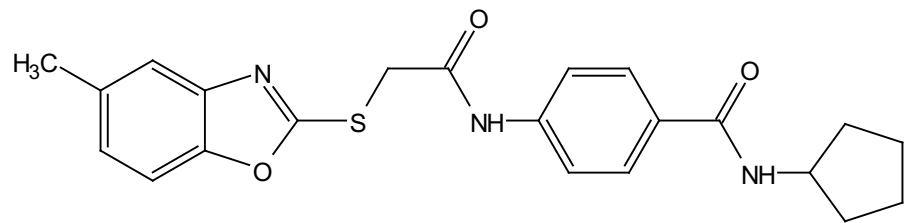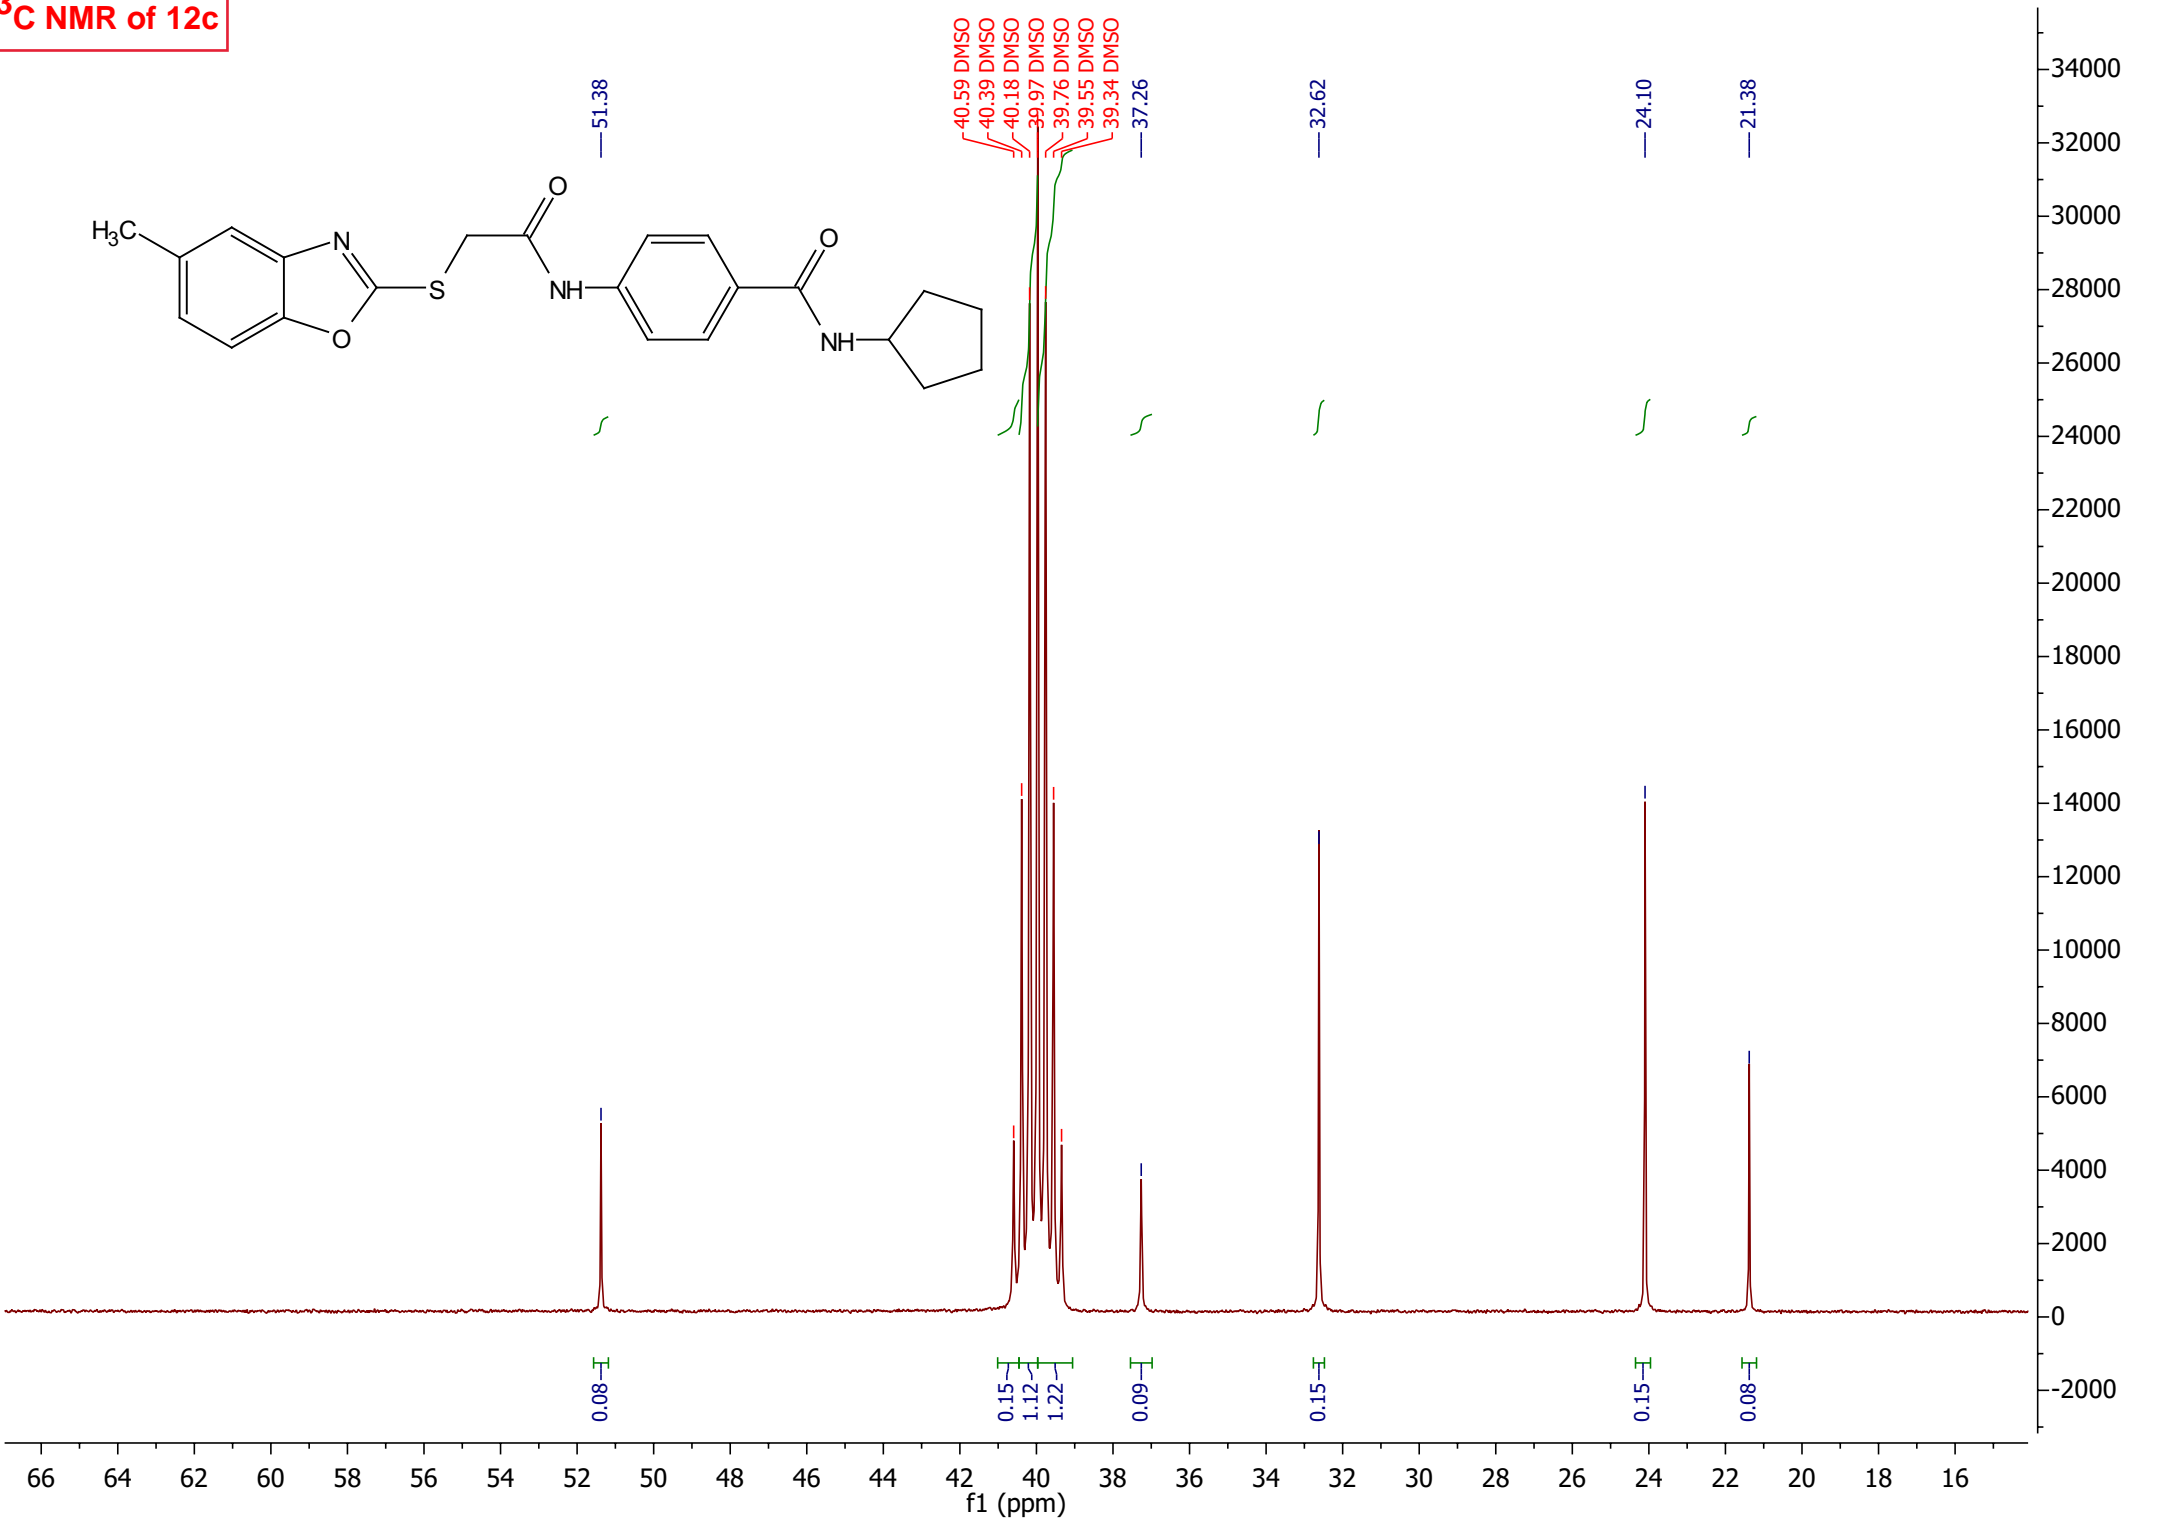

# <sup>13</sup>C NMR of 12c

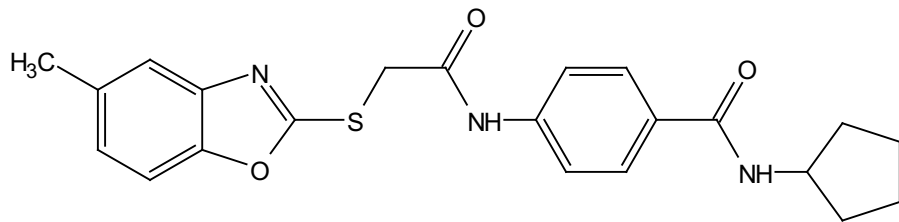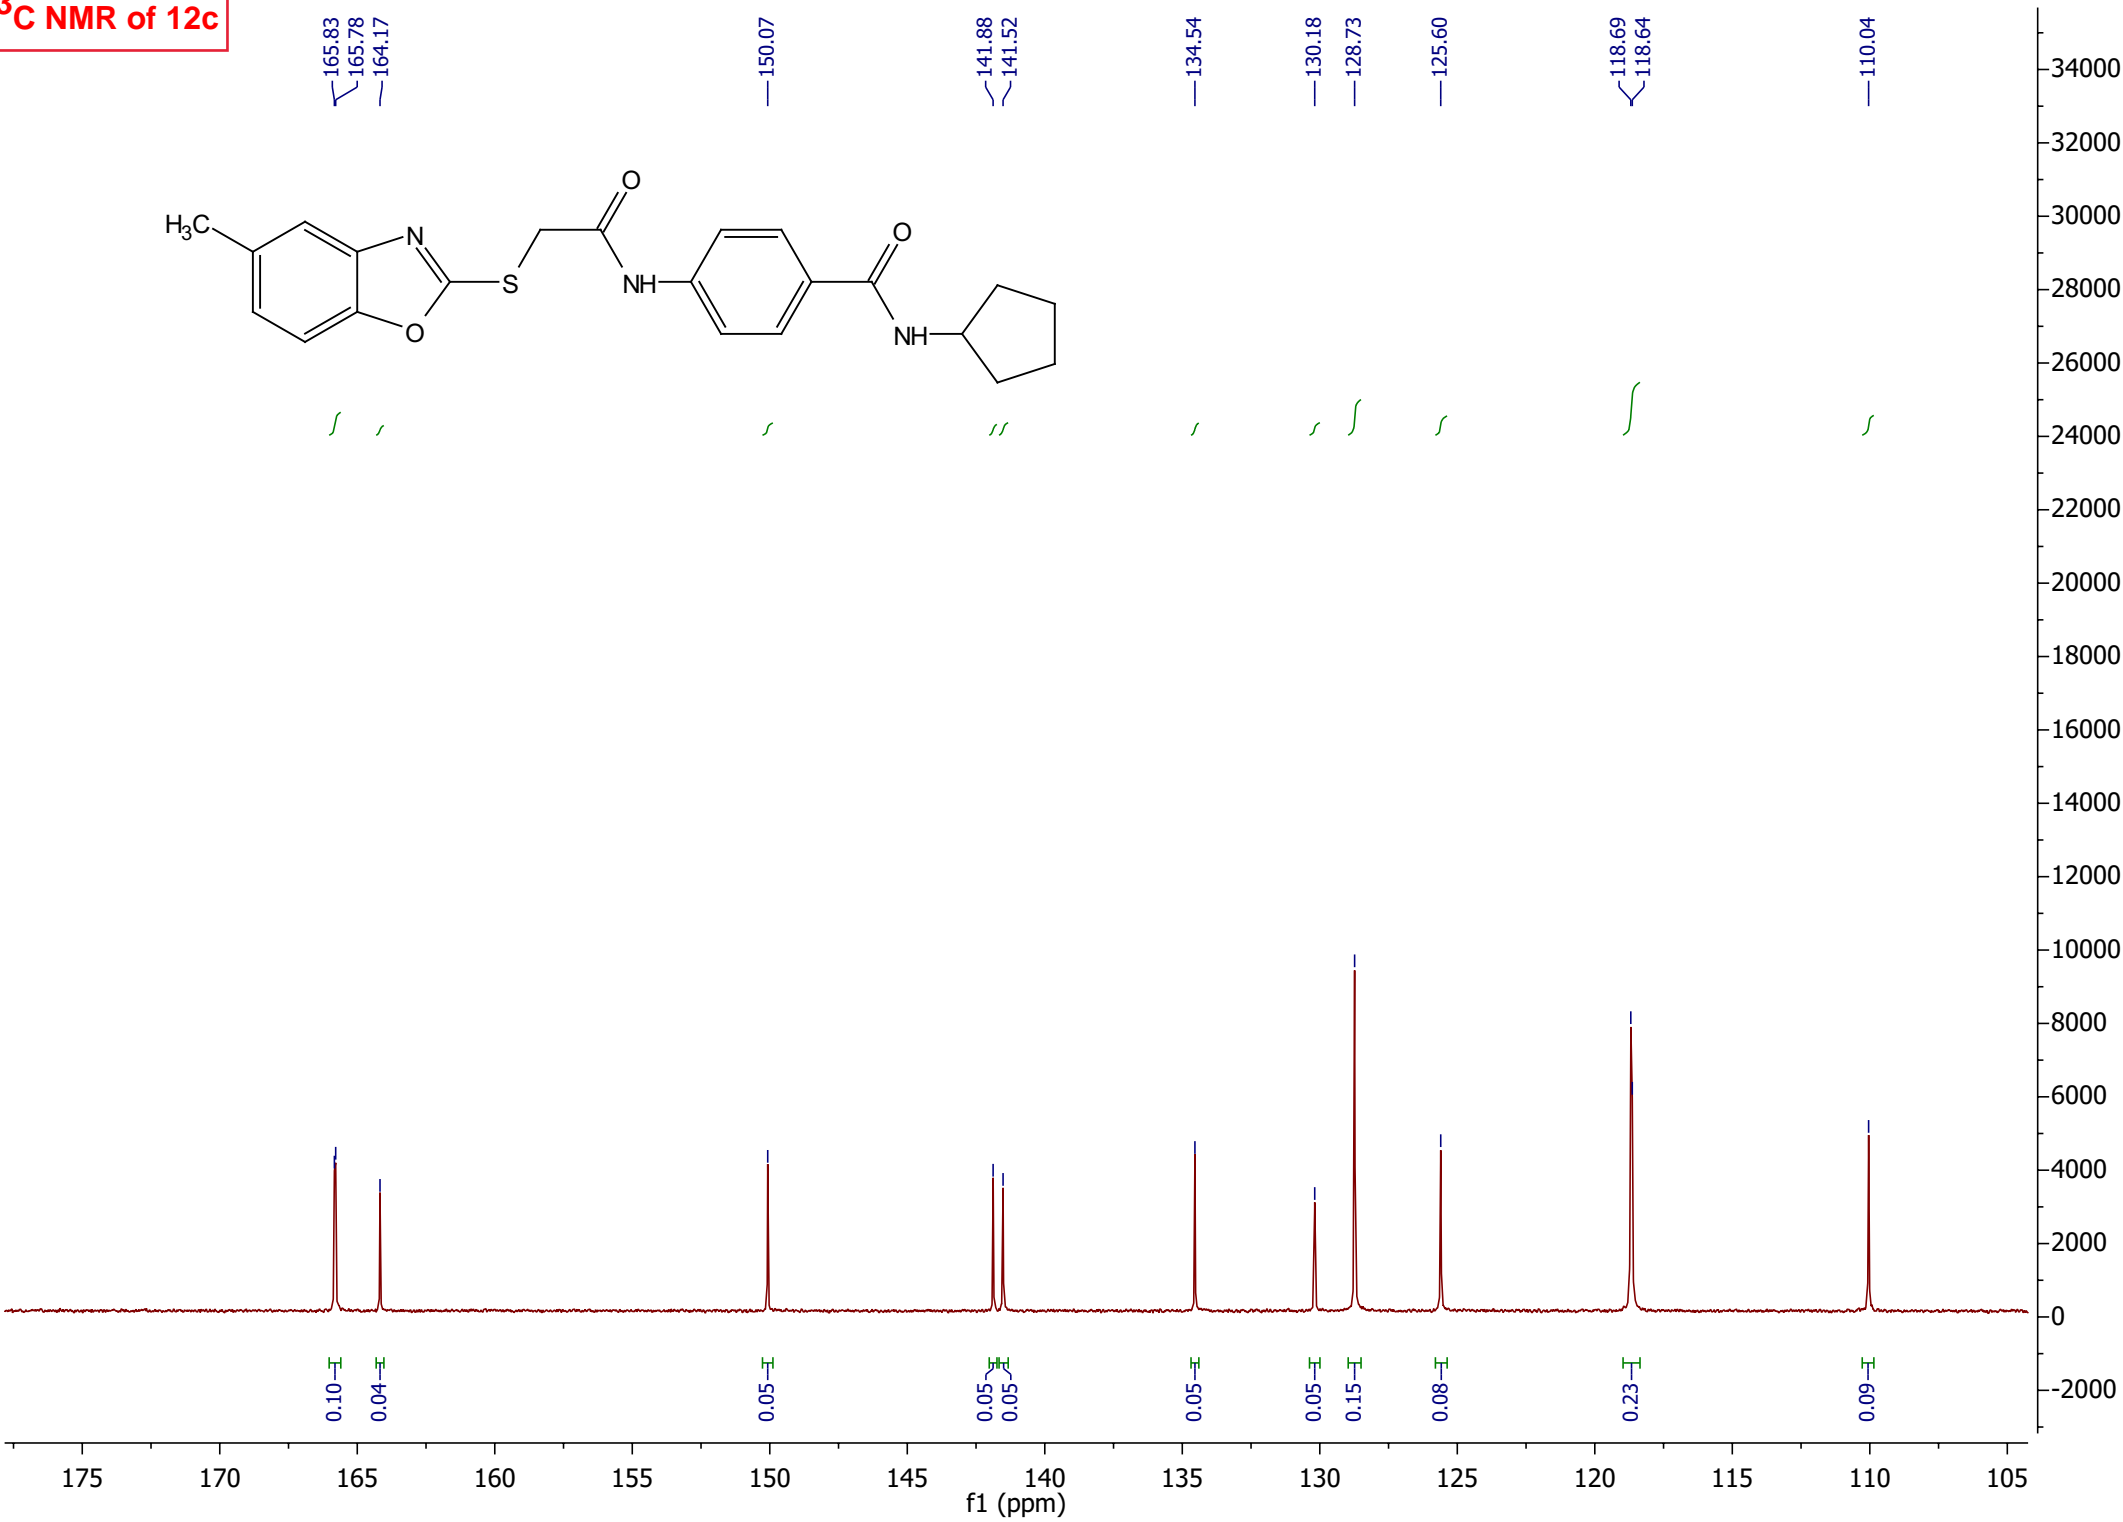

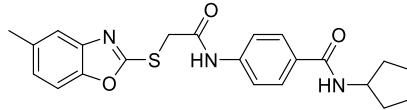

Mass spec. of 12c

RT: 0.00 - 3.25 SM: 7G

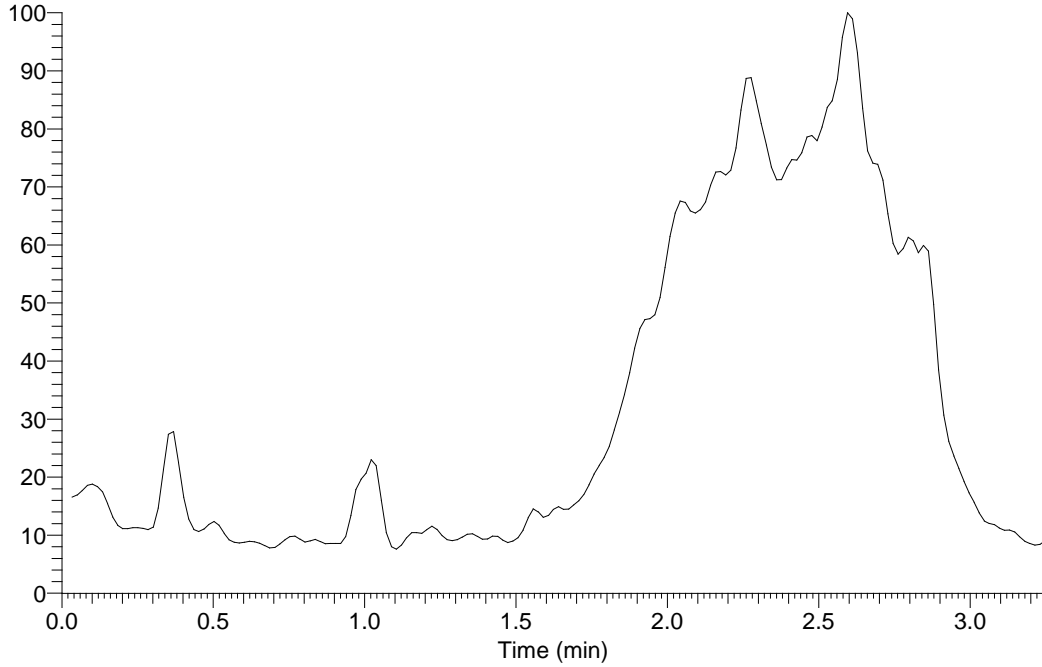

NL:  
1.18E5  
TIC MS  
Hazem-  
Abdelhady-  
MBA20

Hazem-Abdelhady-MBA20 #147 RT: 2.48 AV: 1 NL: 2.39E4  
T: + c EI Full ms [40.00-1000.00]

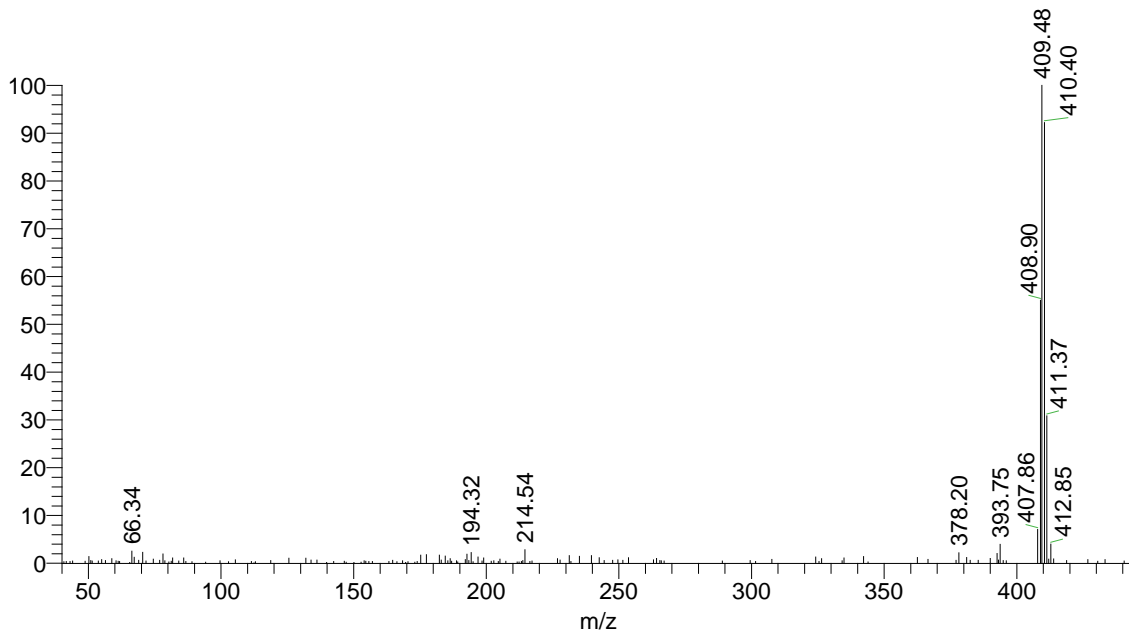

# IR Of Comp. 12d

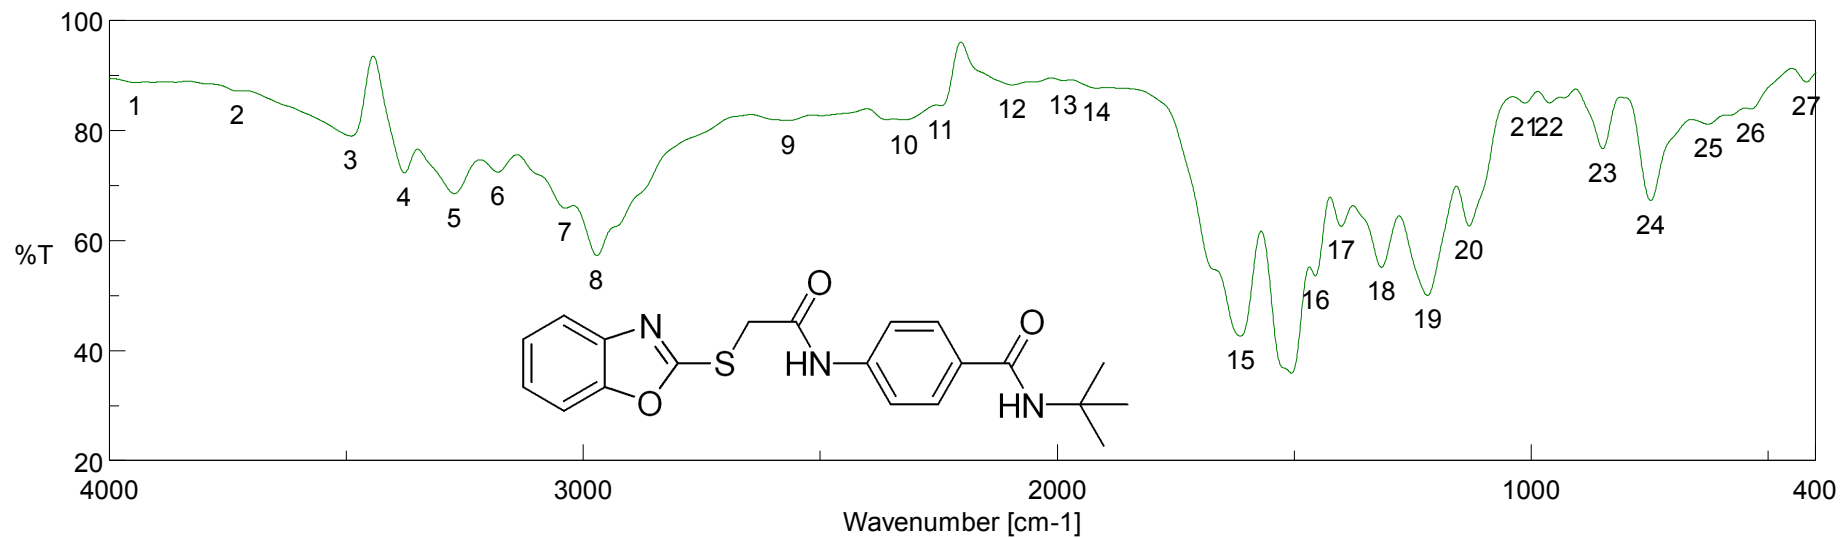

[ Result of Peak Picking ]

| No. | Position | Intensity | No. | Position | Intensity | No. | Position | Intensity | No. | Position | Intensity |
|-----|----------|-----------|-----|----------|-----------|-----|----------|-----------|-----|----------|-----------|
| 1   | 3945.64  | 88.7055   | 2   | 3730.62  | 87.1236   | 3   | 3490.53  | 78.9538   | 4   | 3377.71  | 72.2367   |
| 5   | 3272.61  | 68.484    | 6   | 3180.04  | 72.4134   | 7   | 3038.3   | 65.8248   | 8   | 2971.77  | 57.2148   |
| 9   | 2566.79  | 81.8072   | 10  | 2323.8   | 81.8976   | 11  | 2244.74  | 84.4556   | 12  | 2095.28  | 88.2464   |
| 13  | 1987.29  | 89.0325   | 14  | 1916.9   | 87.6549   | 15  | 1613.16  | 42.6012   | 16  | 1455.03  | 53.5738   |
| 17  | 1401.03  | 62.5312   | 18  | 1316.18  | 55.0999   | 19  | 1218.79  | 49.9762   | 20  | 1131.05  | 62.6221   |
| 21  | 1012.45  | 84.9699   | 22  | 961.341  | 84.9805   | 23  | 848.525  | 76.6698   | 24  | 747.281  | 67.2273   |
| 25  | 625.788  | 81.1076   | 26  | 536.114  | 83.8807   | 27  | 418.477  | 88.763    |     |          |           |

# <sup>1</sup>H NMR of 12d

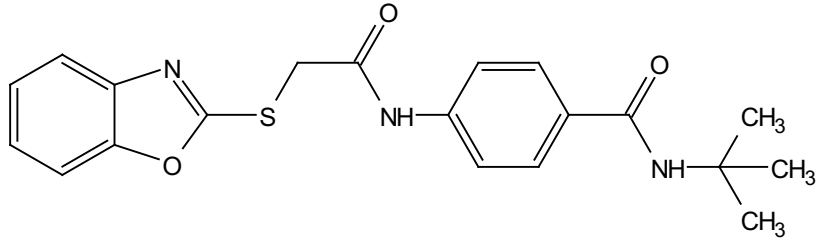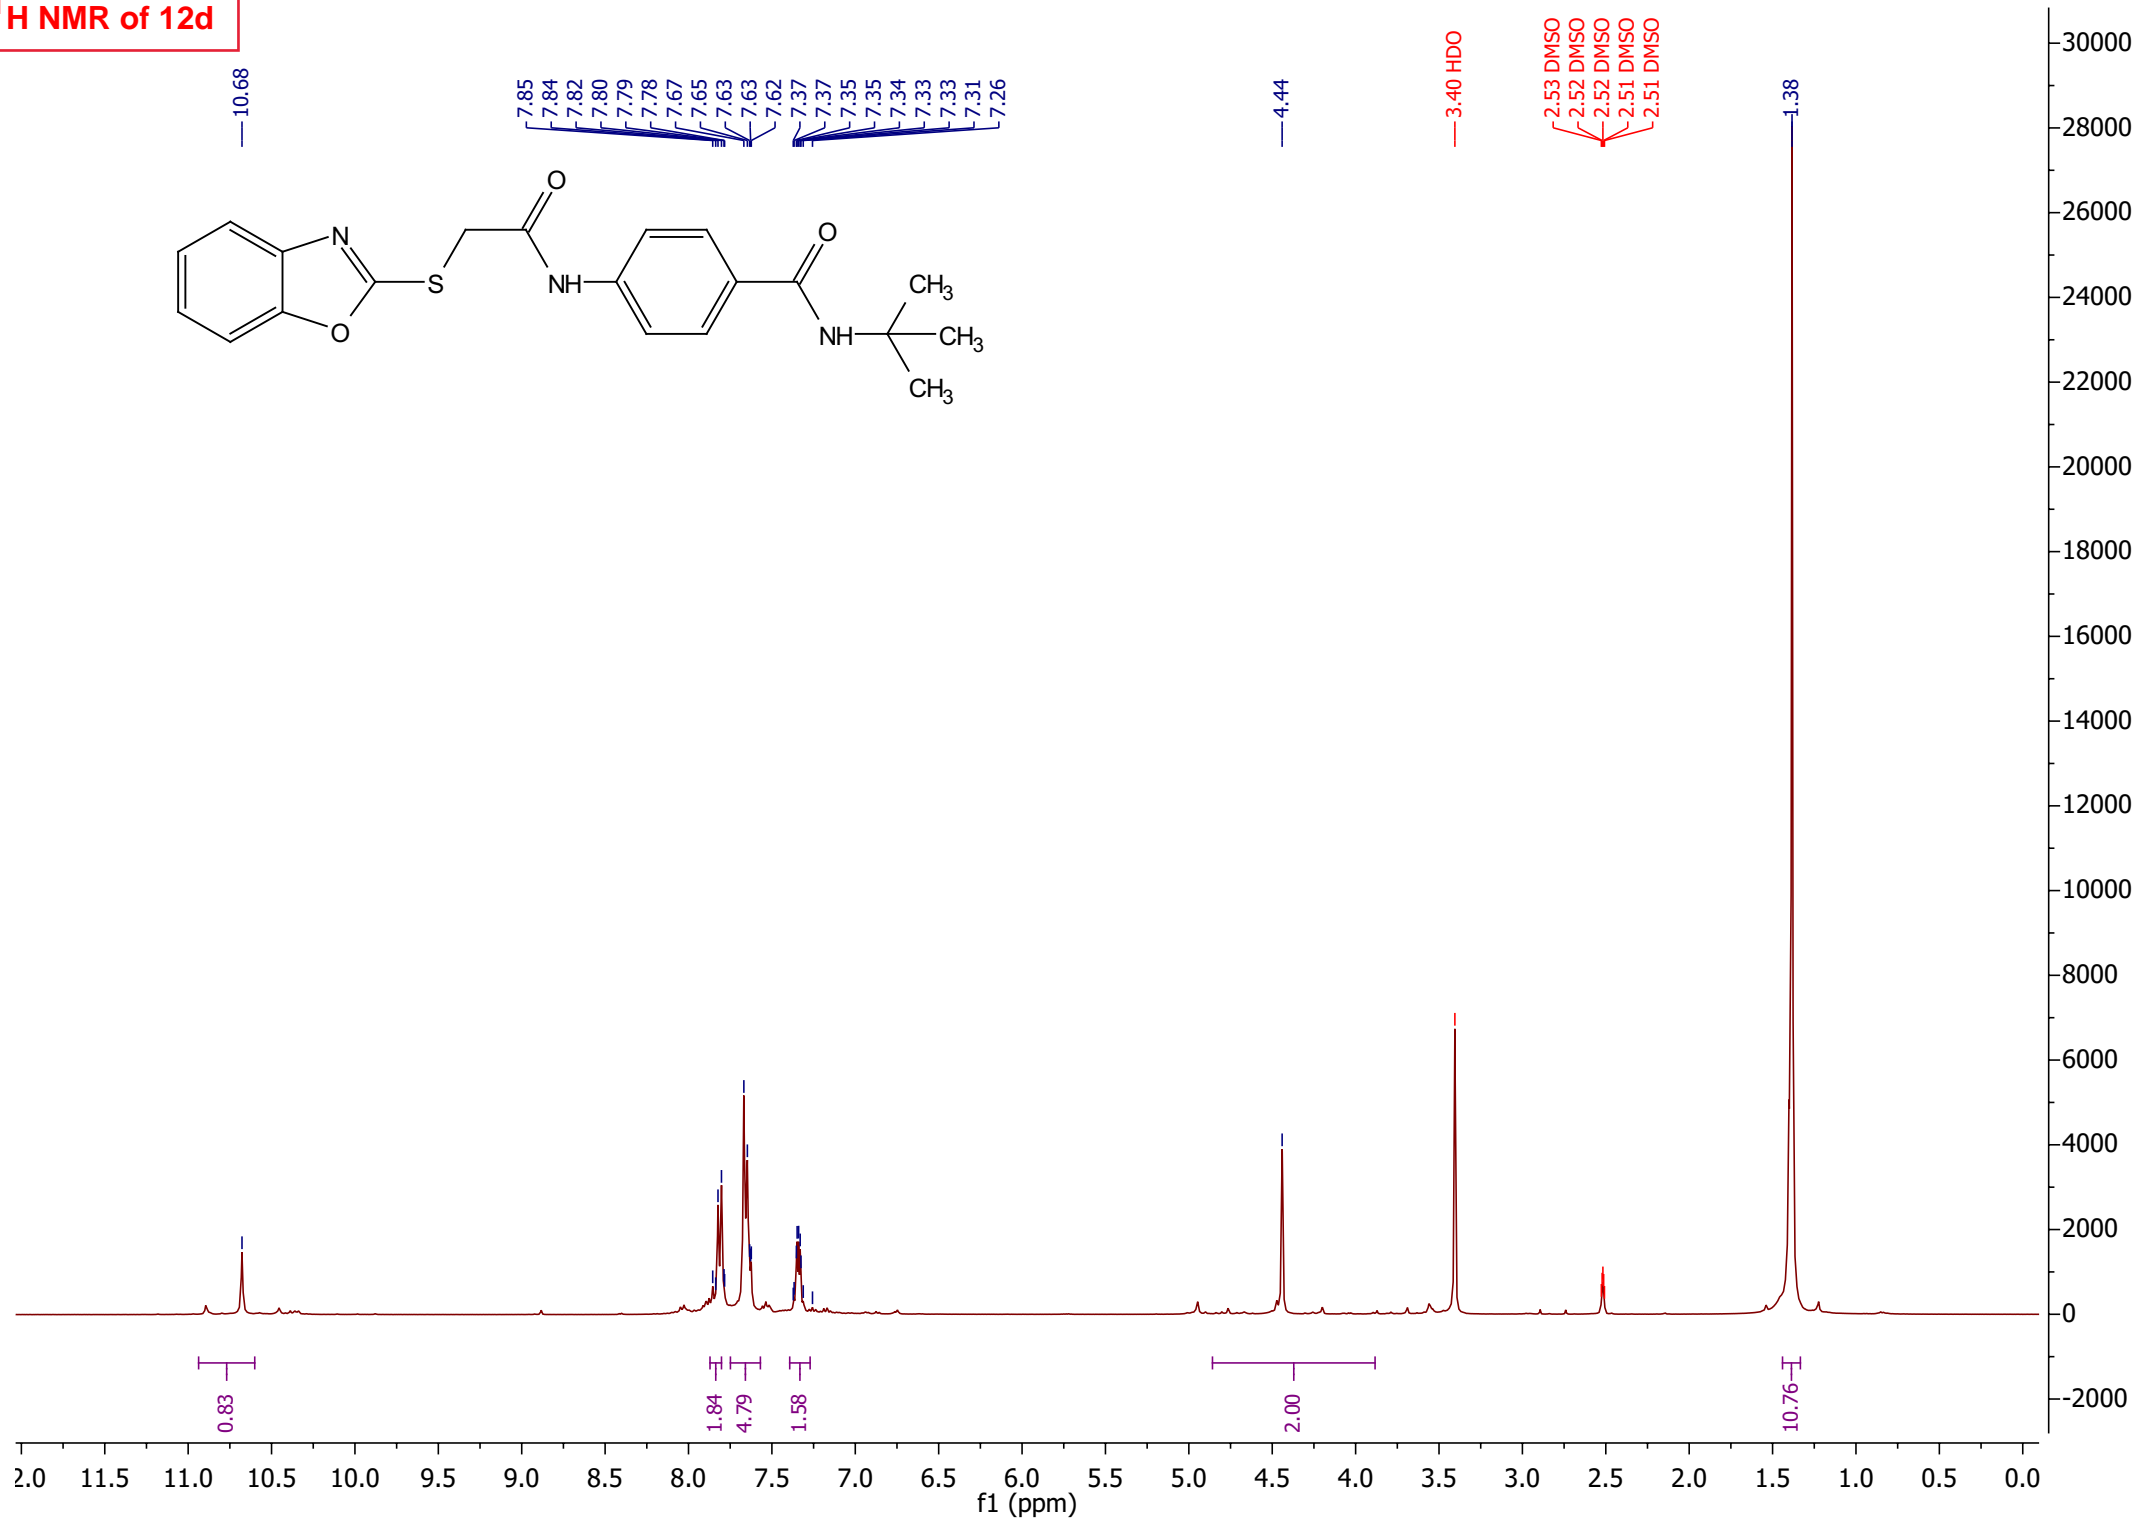

**<sup>1</sup>H NMR of 12d**

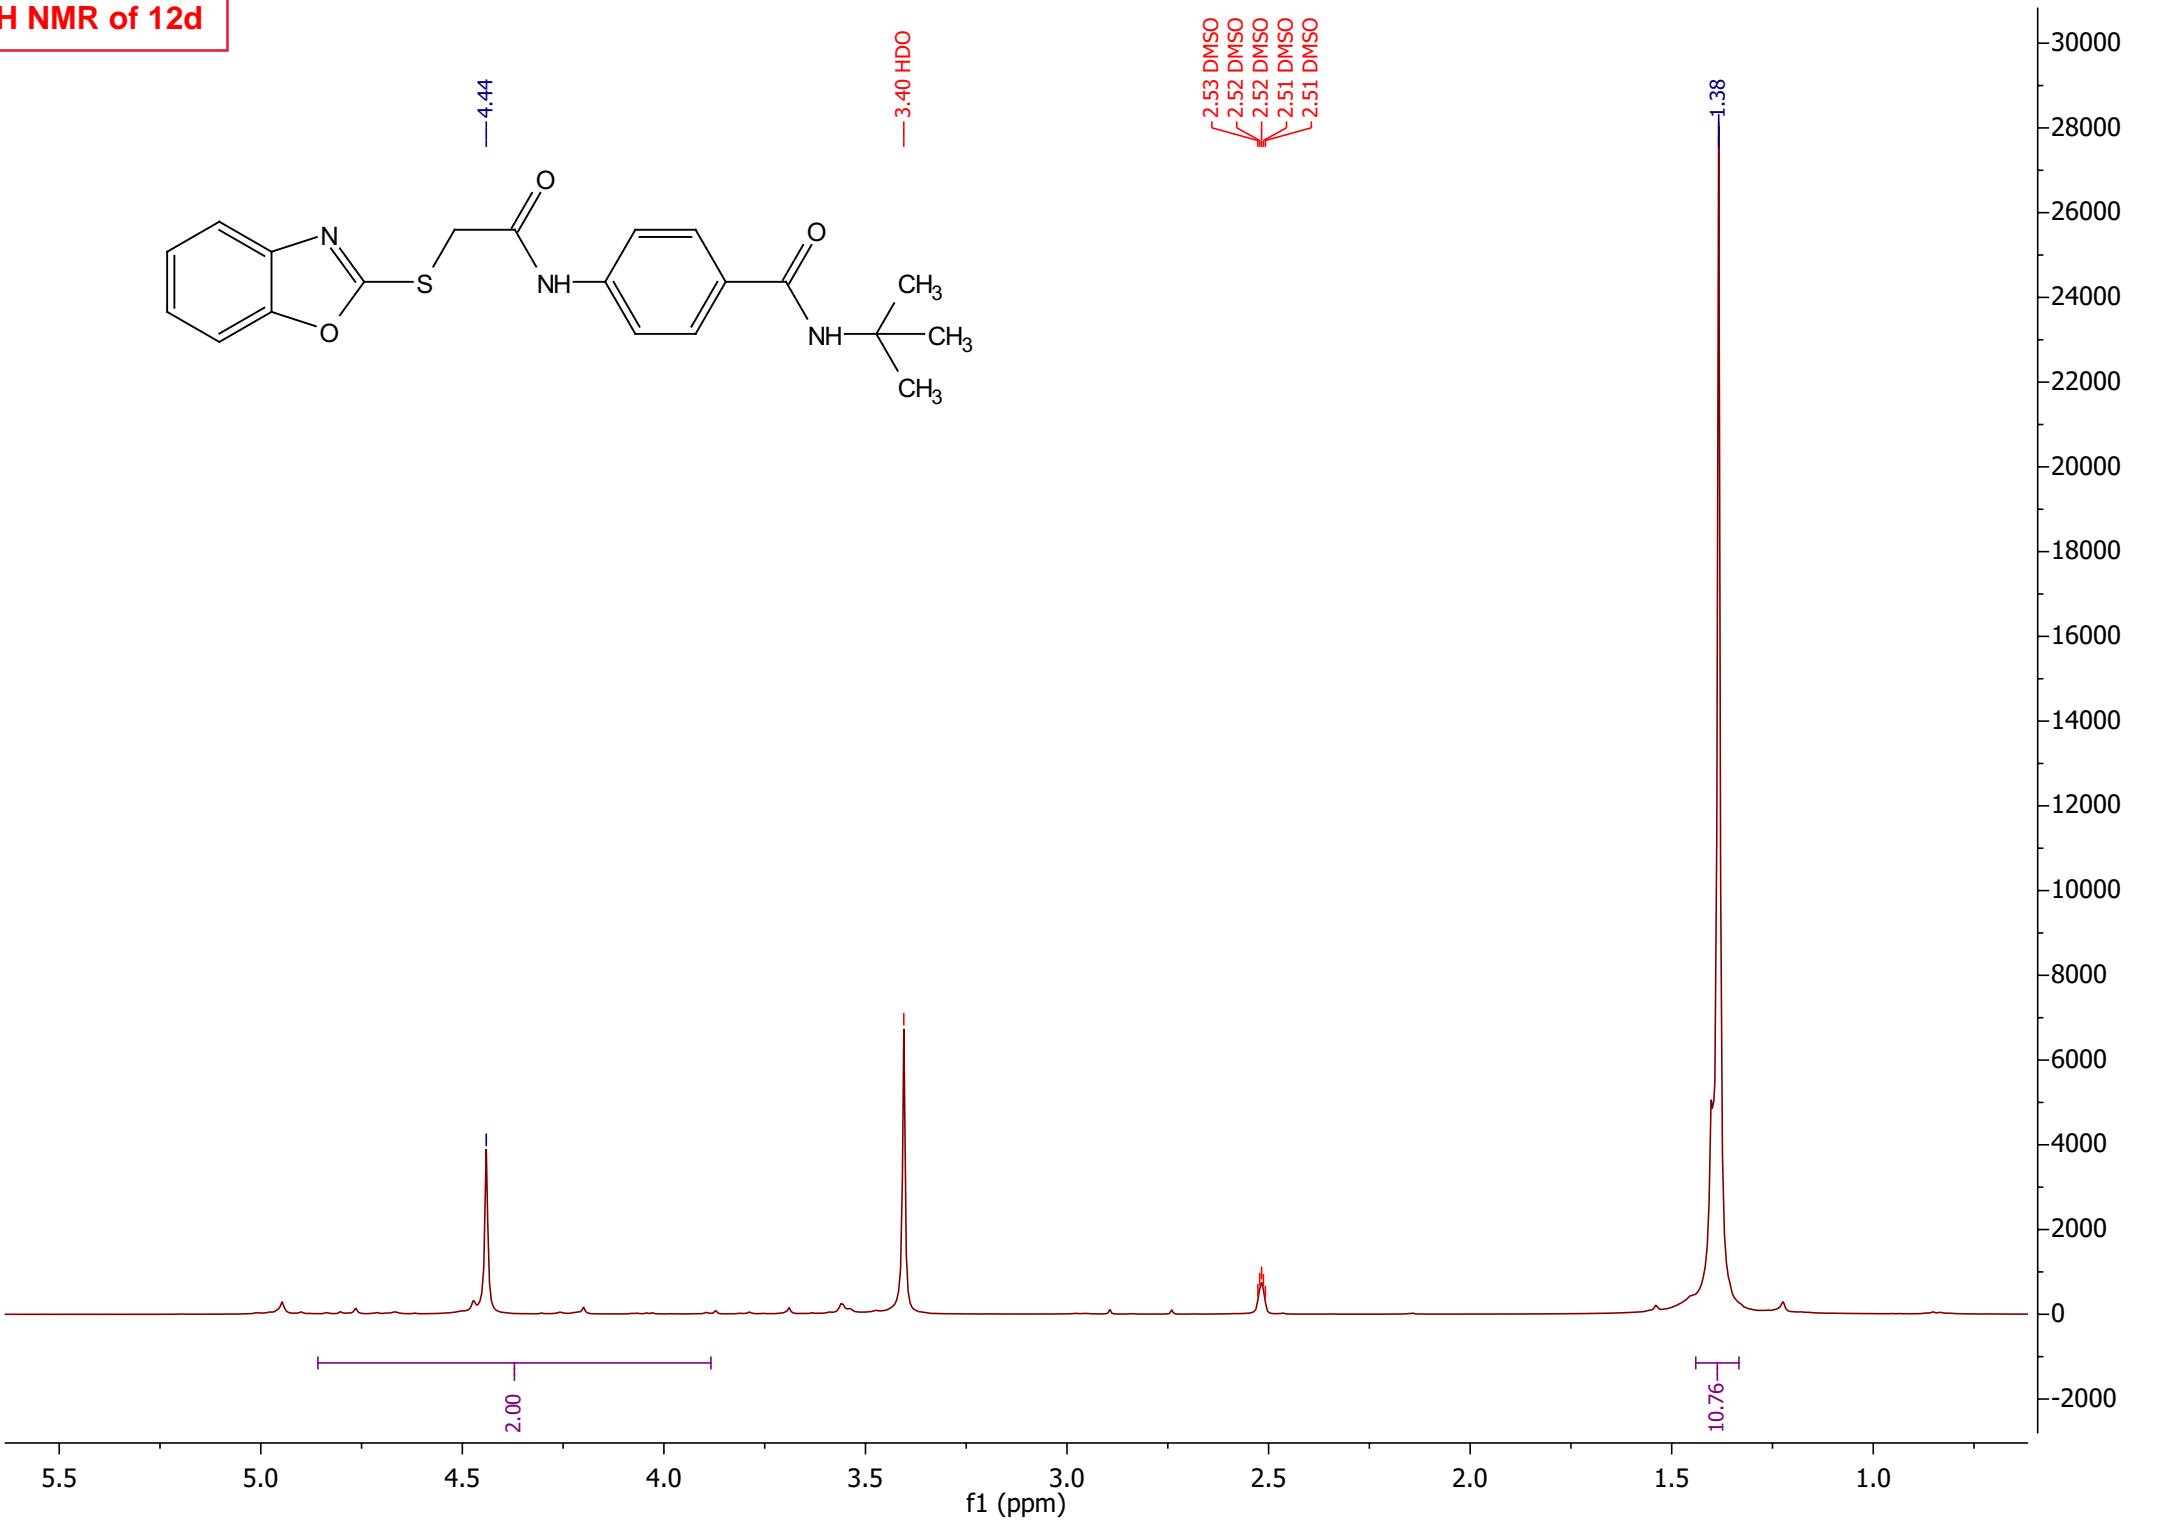

**1H NMR of 12d**

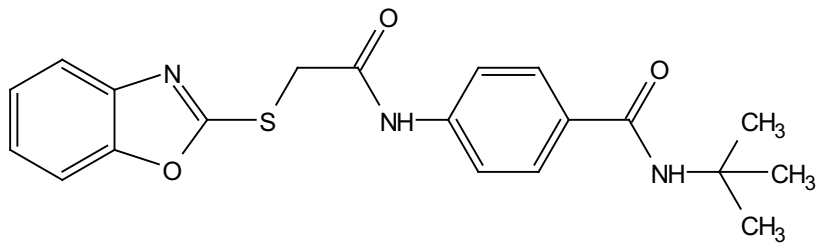

7.85, 7.84, 7.82, 7.80, 7.79, 7.78, 7.67, 7.65, 7.63, 7.63, 7.62, 7.37, 7.37, 7.35, 7.35, 7.34, 7.33, 7.33, 7.31, 7.26

0.83

1.84

4.79

1.58

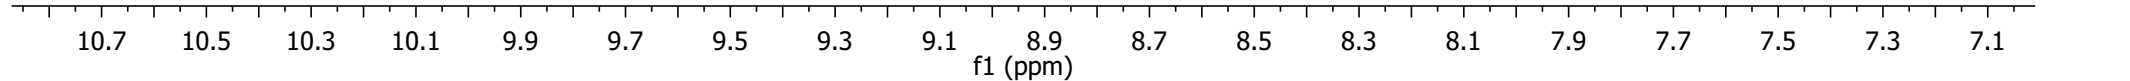



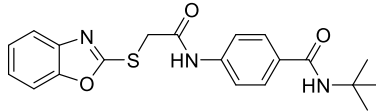

Mass spec. of 12d

RT: 0.00 - 4.10 SM: 7G

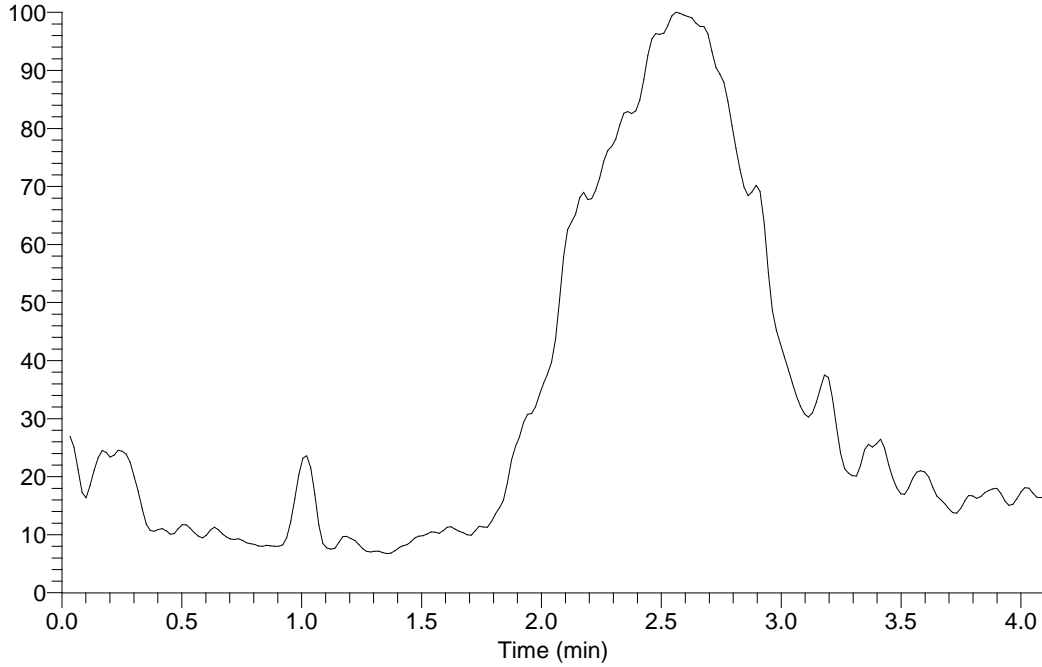

NL:  
1.83E5  
TIC MS  
Hazem-  
Abdelhady-  
PBA35

Hazem-Abdelhady-PBA35 #185 RT: 3.11 AV: 1 NL: 1.76E4  
T: + c EI Full ms [40.00-1000.00]

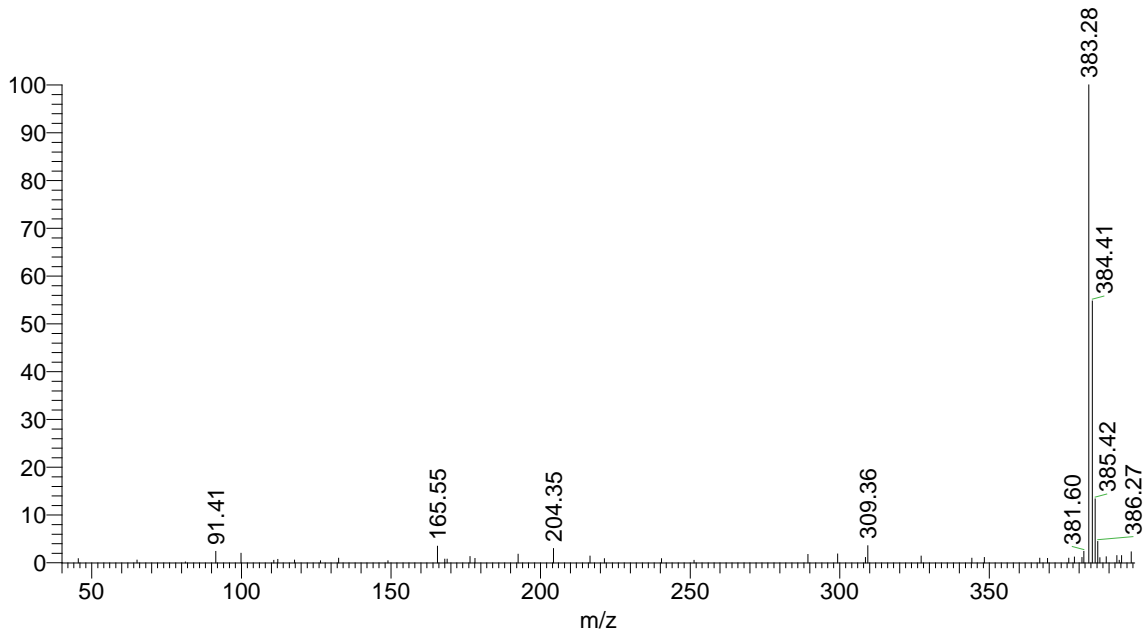

# IR Of Comp. 12e

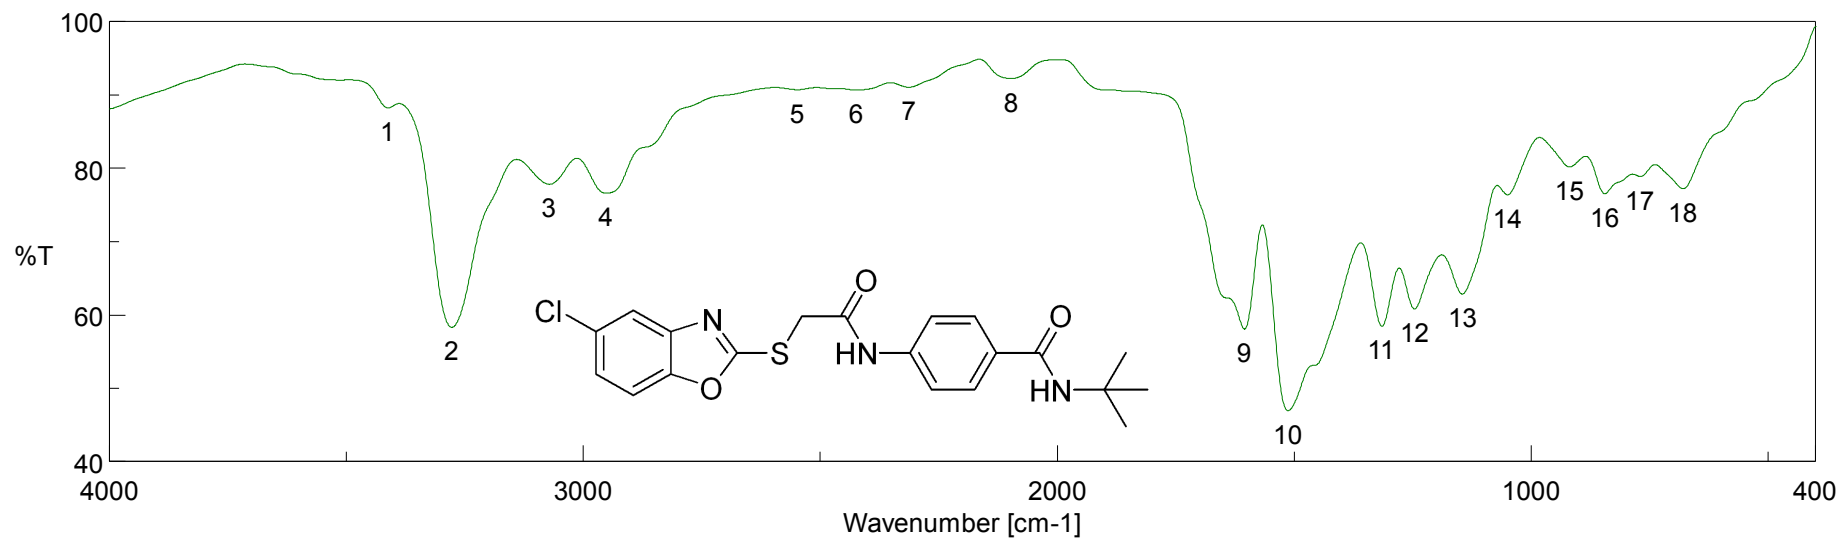

### [ Result of Peak Picking ]

| No. | Position | Intensity | No. | Position | Intensity | No. | Position | Intensity | No. | Position | Intensity |
|-----|----------|-----------|-----|----------|-----------|-----|----------|-----------|-----|----------|-----------|
| 1   | 3412.42  | 88.1914   | 2   | 3277.43  | 58.2797   | 3   | 3072.05  | 77.7668   | 4   | 2951.52  | 76.5641   |
| 5   | 2548.47  | 90.6699   | 6   | 2423.12  | 90.6144   | 7   | 2313.2   | 91.0073   | 8   | 2097.21  | 92.1935   |
| 9   | 1604.48  | 58.0365   | 10  | 1512.88  | 46.9154   | 11  | 1315.21  | 58.44     | 12  | 1245.79  | 60.7719   |
| 13  | 1144.55  | 62.8167   | 14  | 1049.09  | 76.3545   | 15  | 917.95   | 80.1353   | 16  | 844.669  | 76.5009   |
| 17  | 769.458  | 78.8302   | 18  | 678.82   | 77.1604   |     |          |           |     |          |           |

**<sup>1</sup>H NMR of 12e**

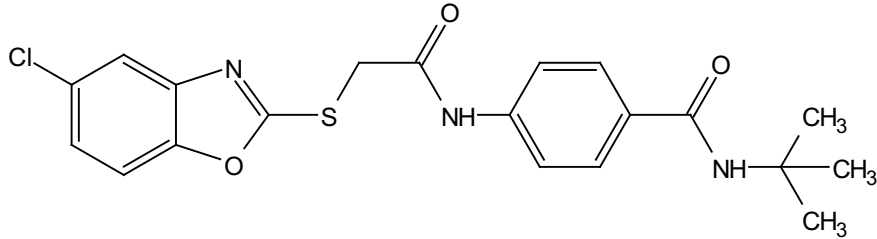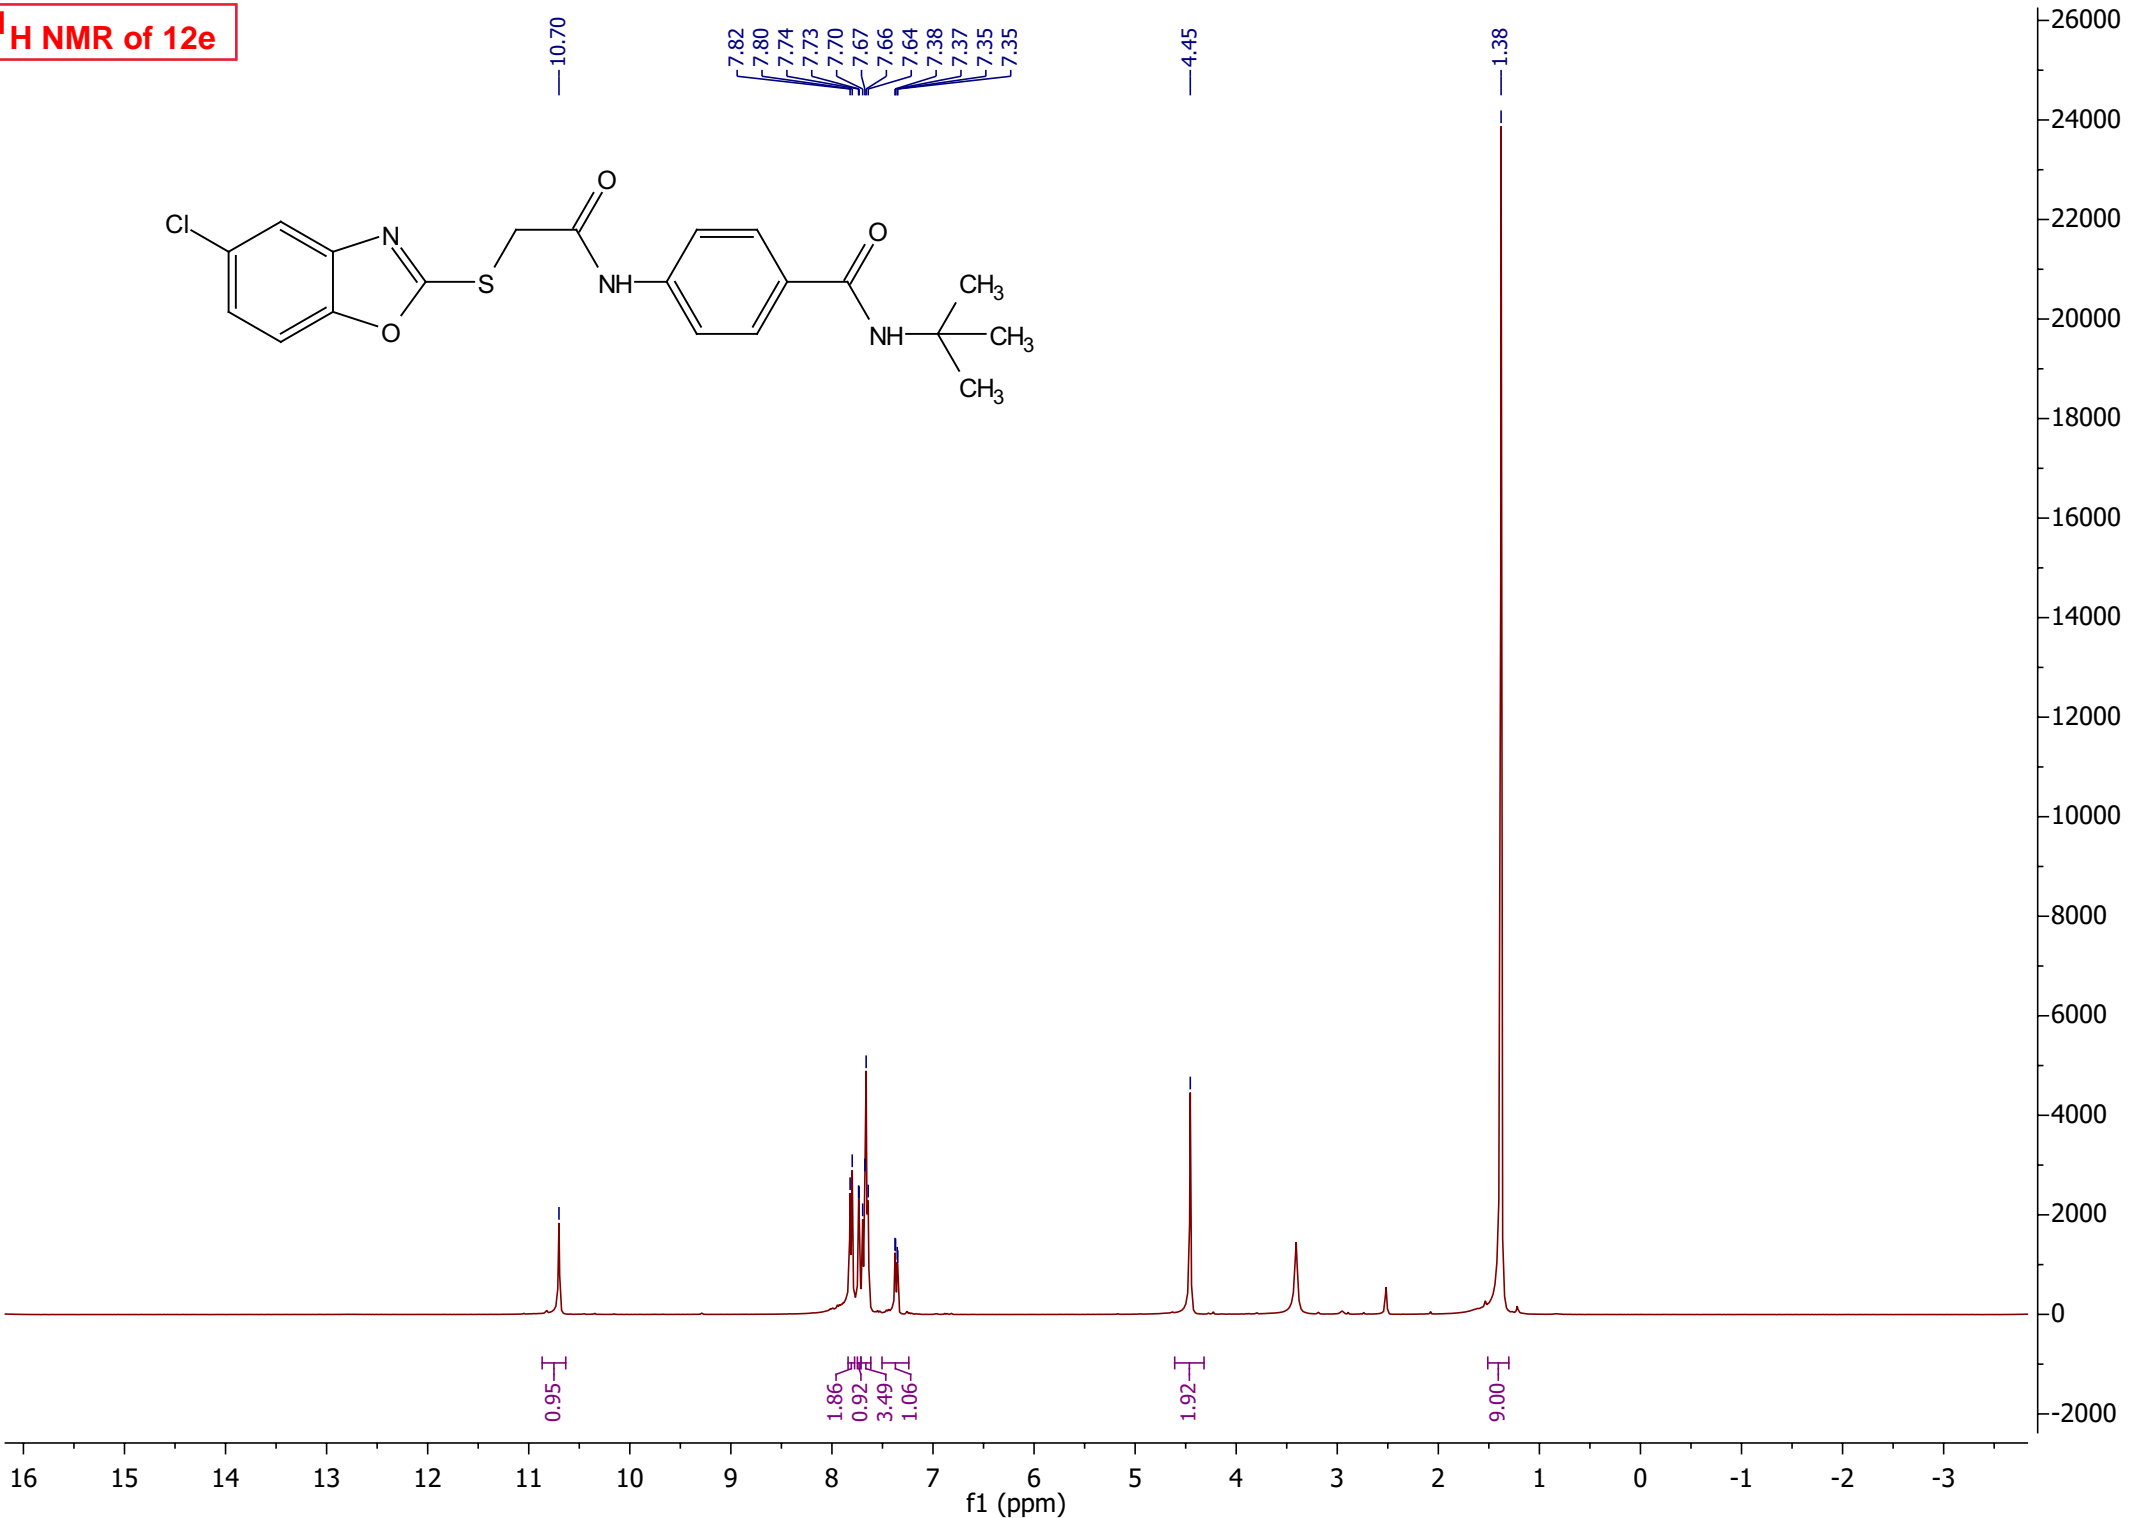

**<sup>1</sup>H NMR of 12e**

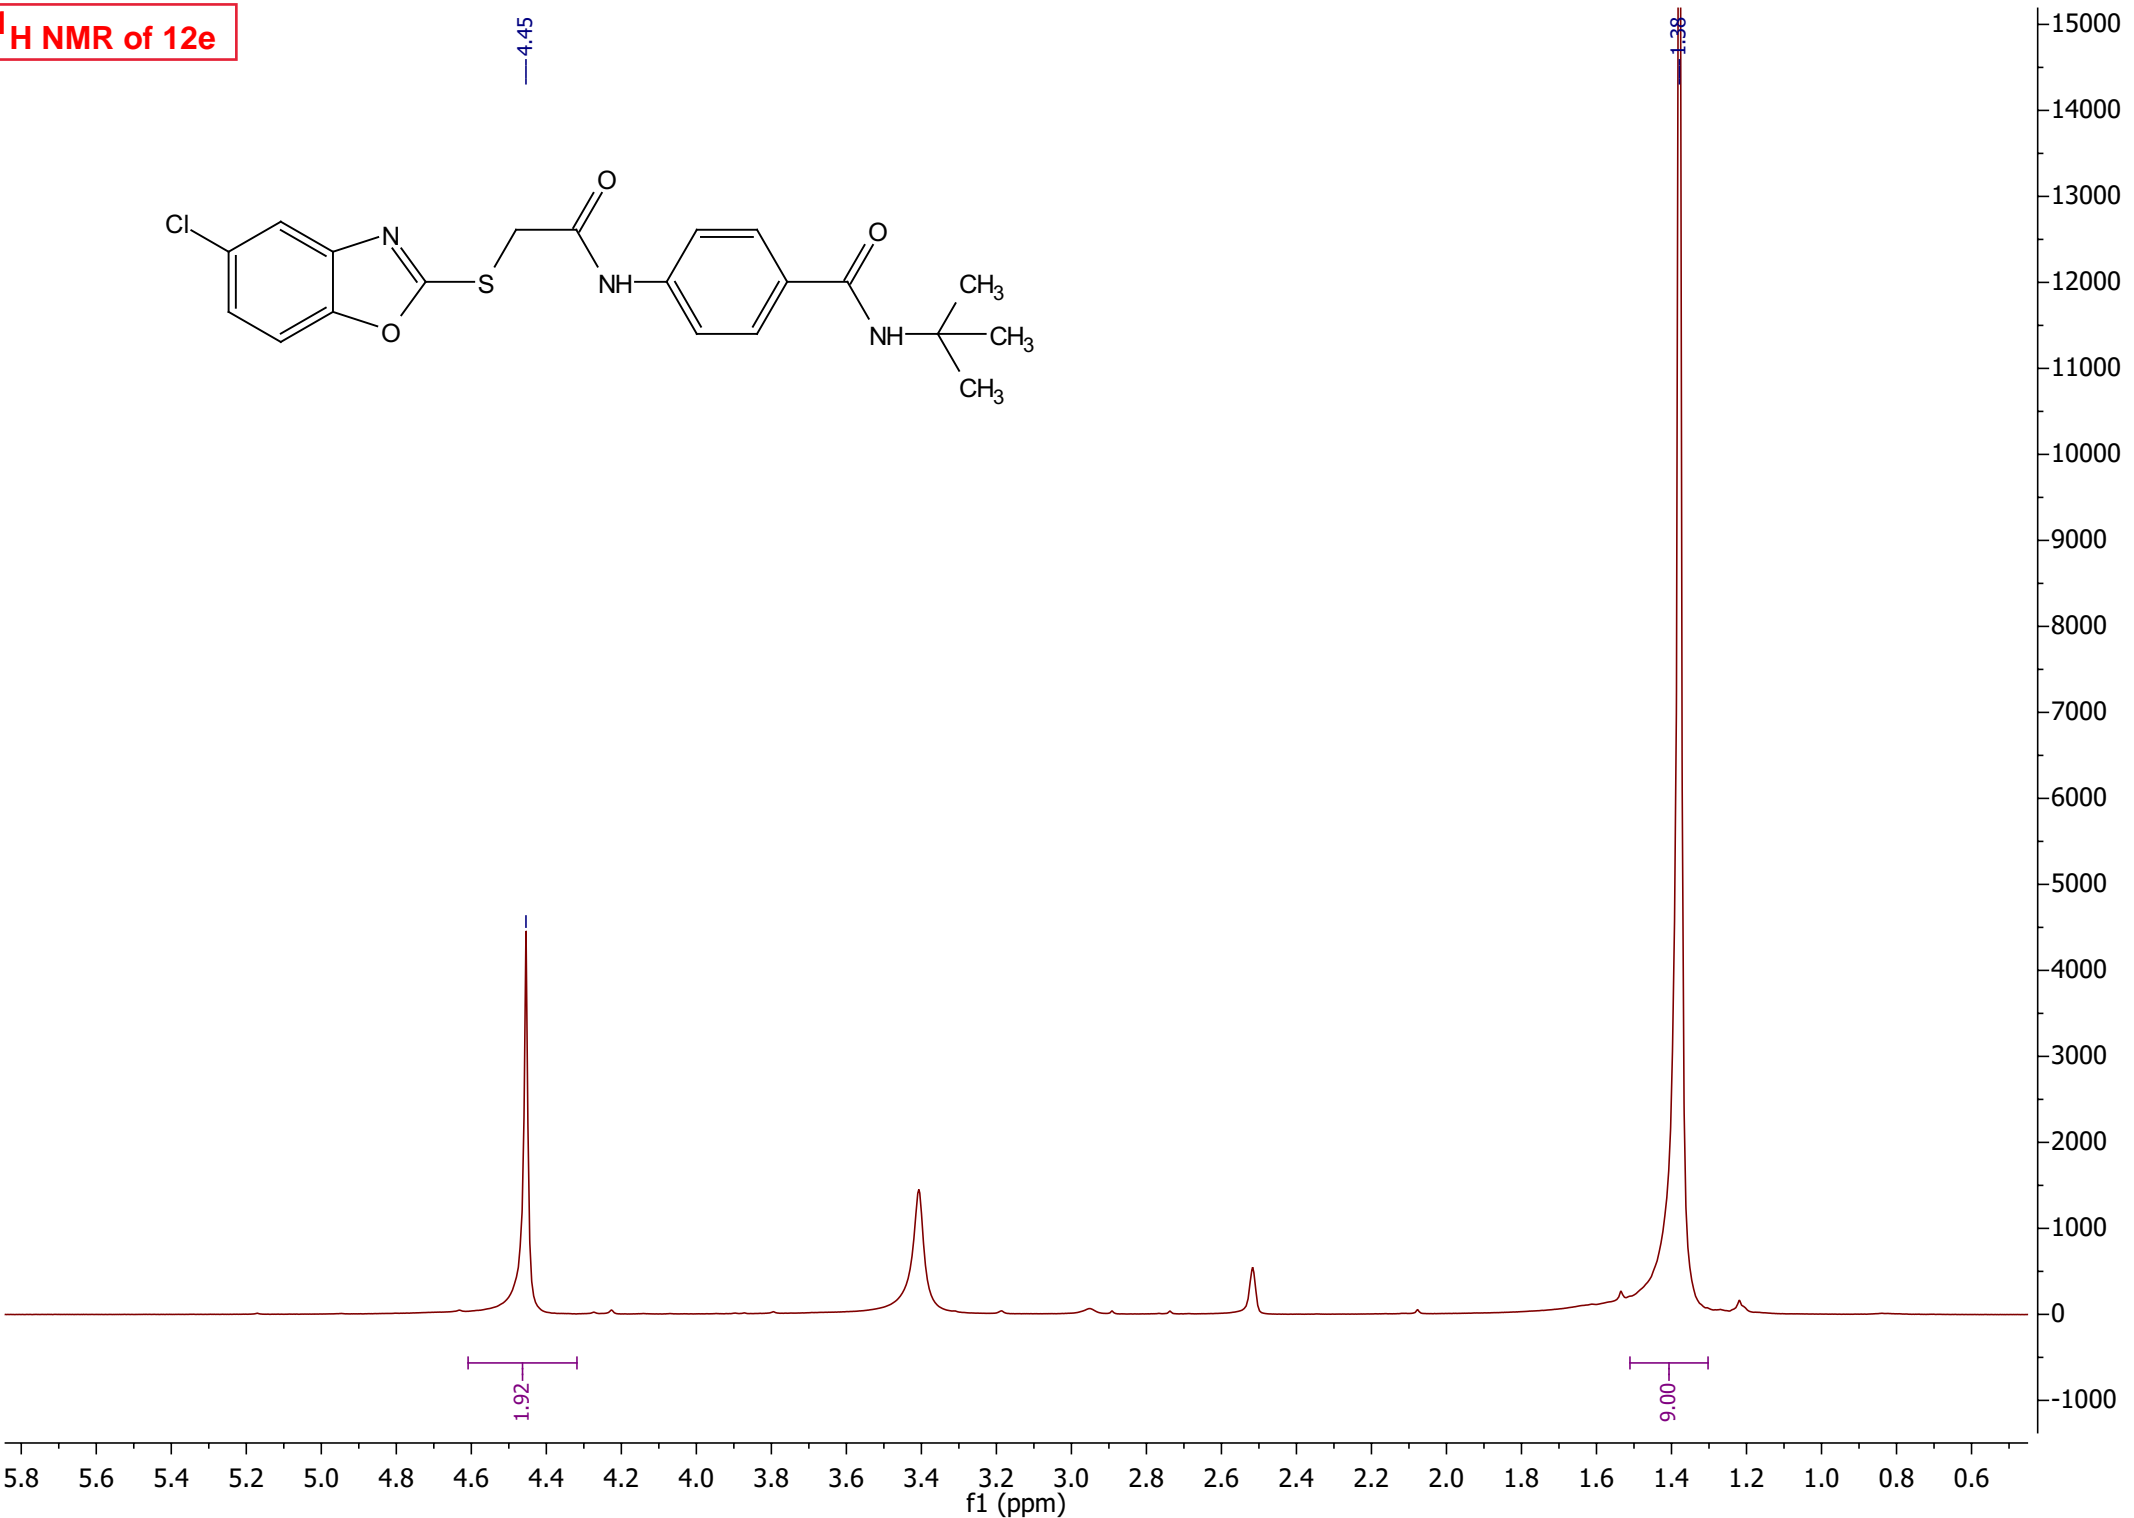

**<sup>1</sup>H NMR of 12e**



10.70

7.82  
7.80  
7.74  
7.73  
7.70  
7.67  
7.66  
7.64

7.38  
7.37  
7.35  
7.35

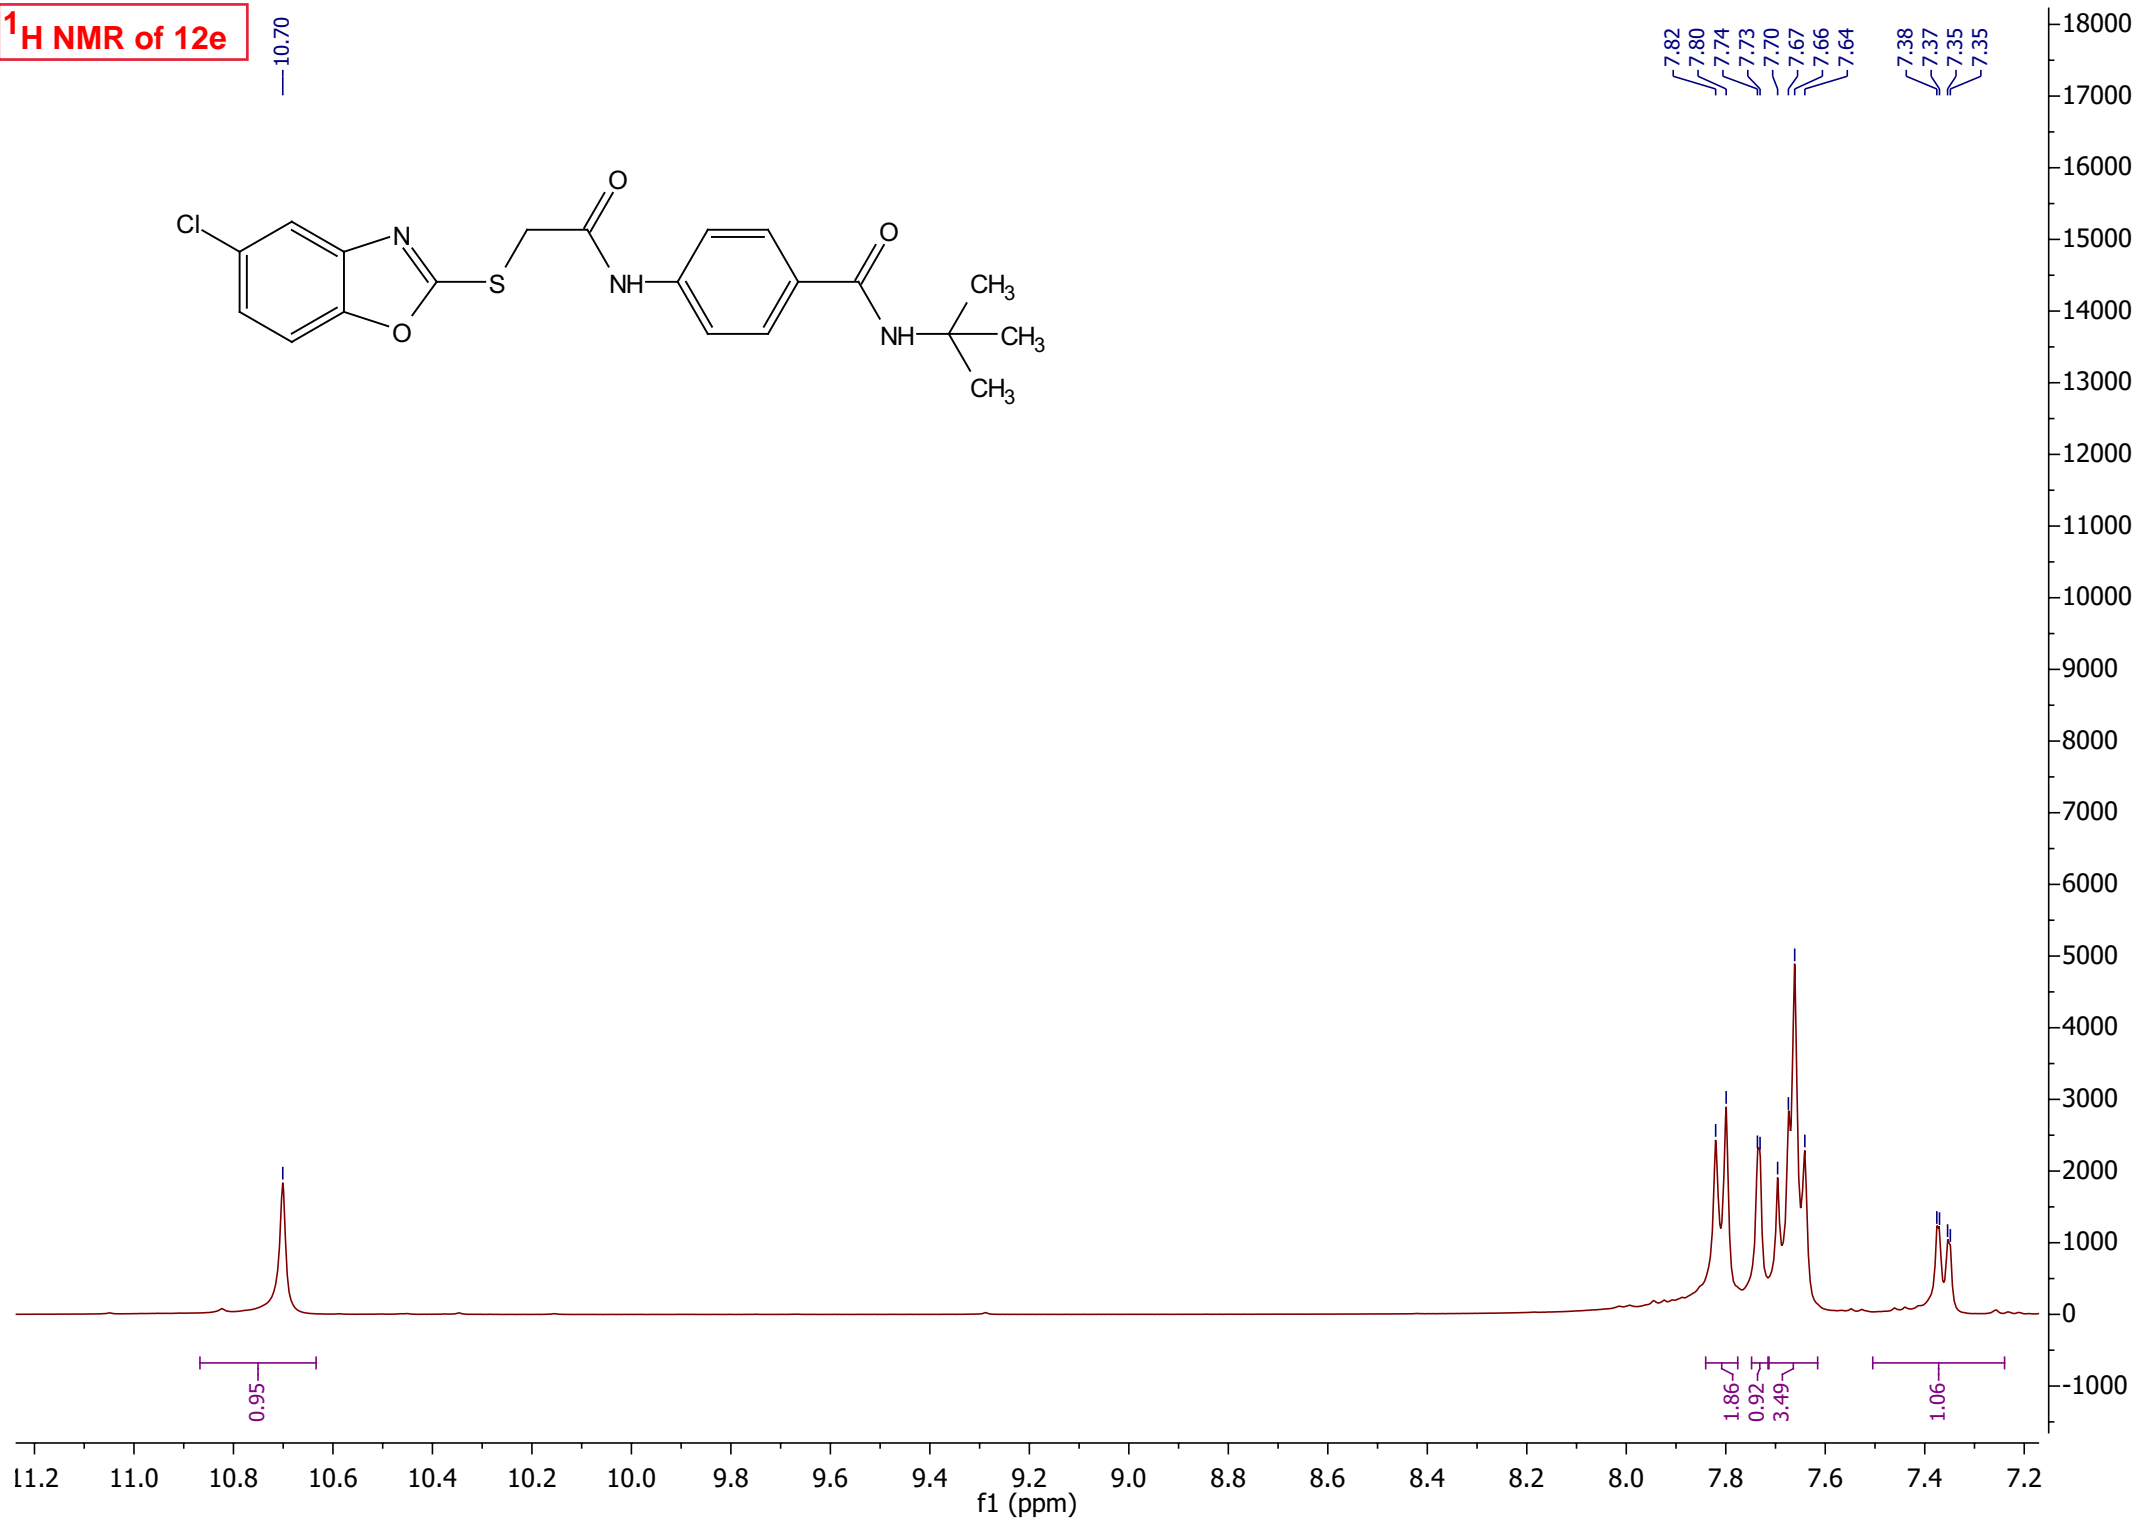

**<sup>13</sup>C NMR of 12e**



166.42  
166.08  
165.57  
150.60  
142.96  
141.32  
131.22  
130.98  
129.46  
128.77  
124.74  
118.61  
118.48  
111.95  
111.61

51.17  
40.60 DMSO  
40.39 DMSO  
40.19 DMSO  
39.98 DMSO  
39.77 DMSO  
39.56 DMSO  
39.35 DMSO  
37.41  
29.10

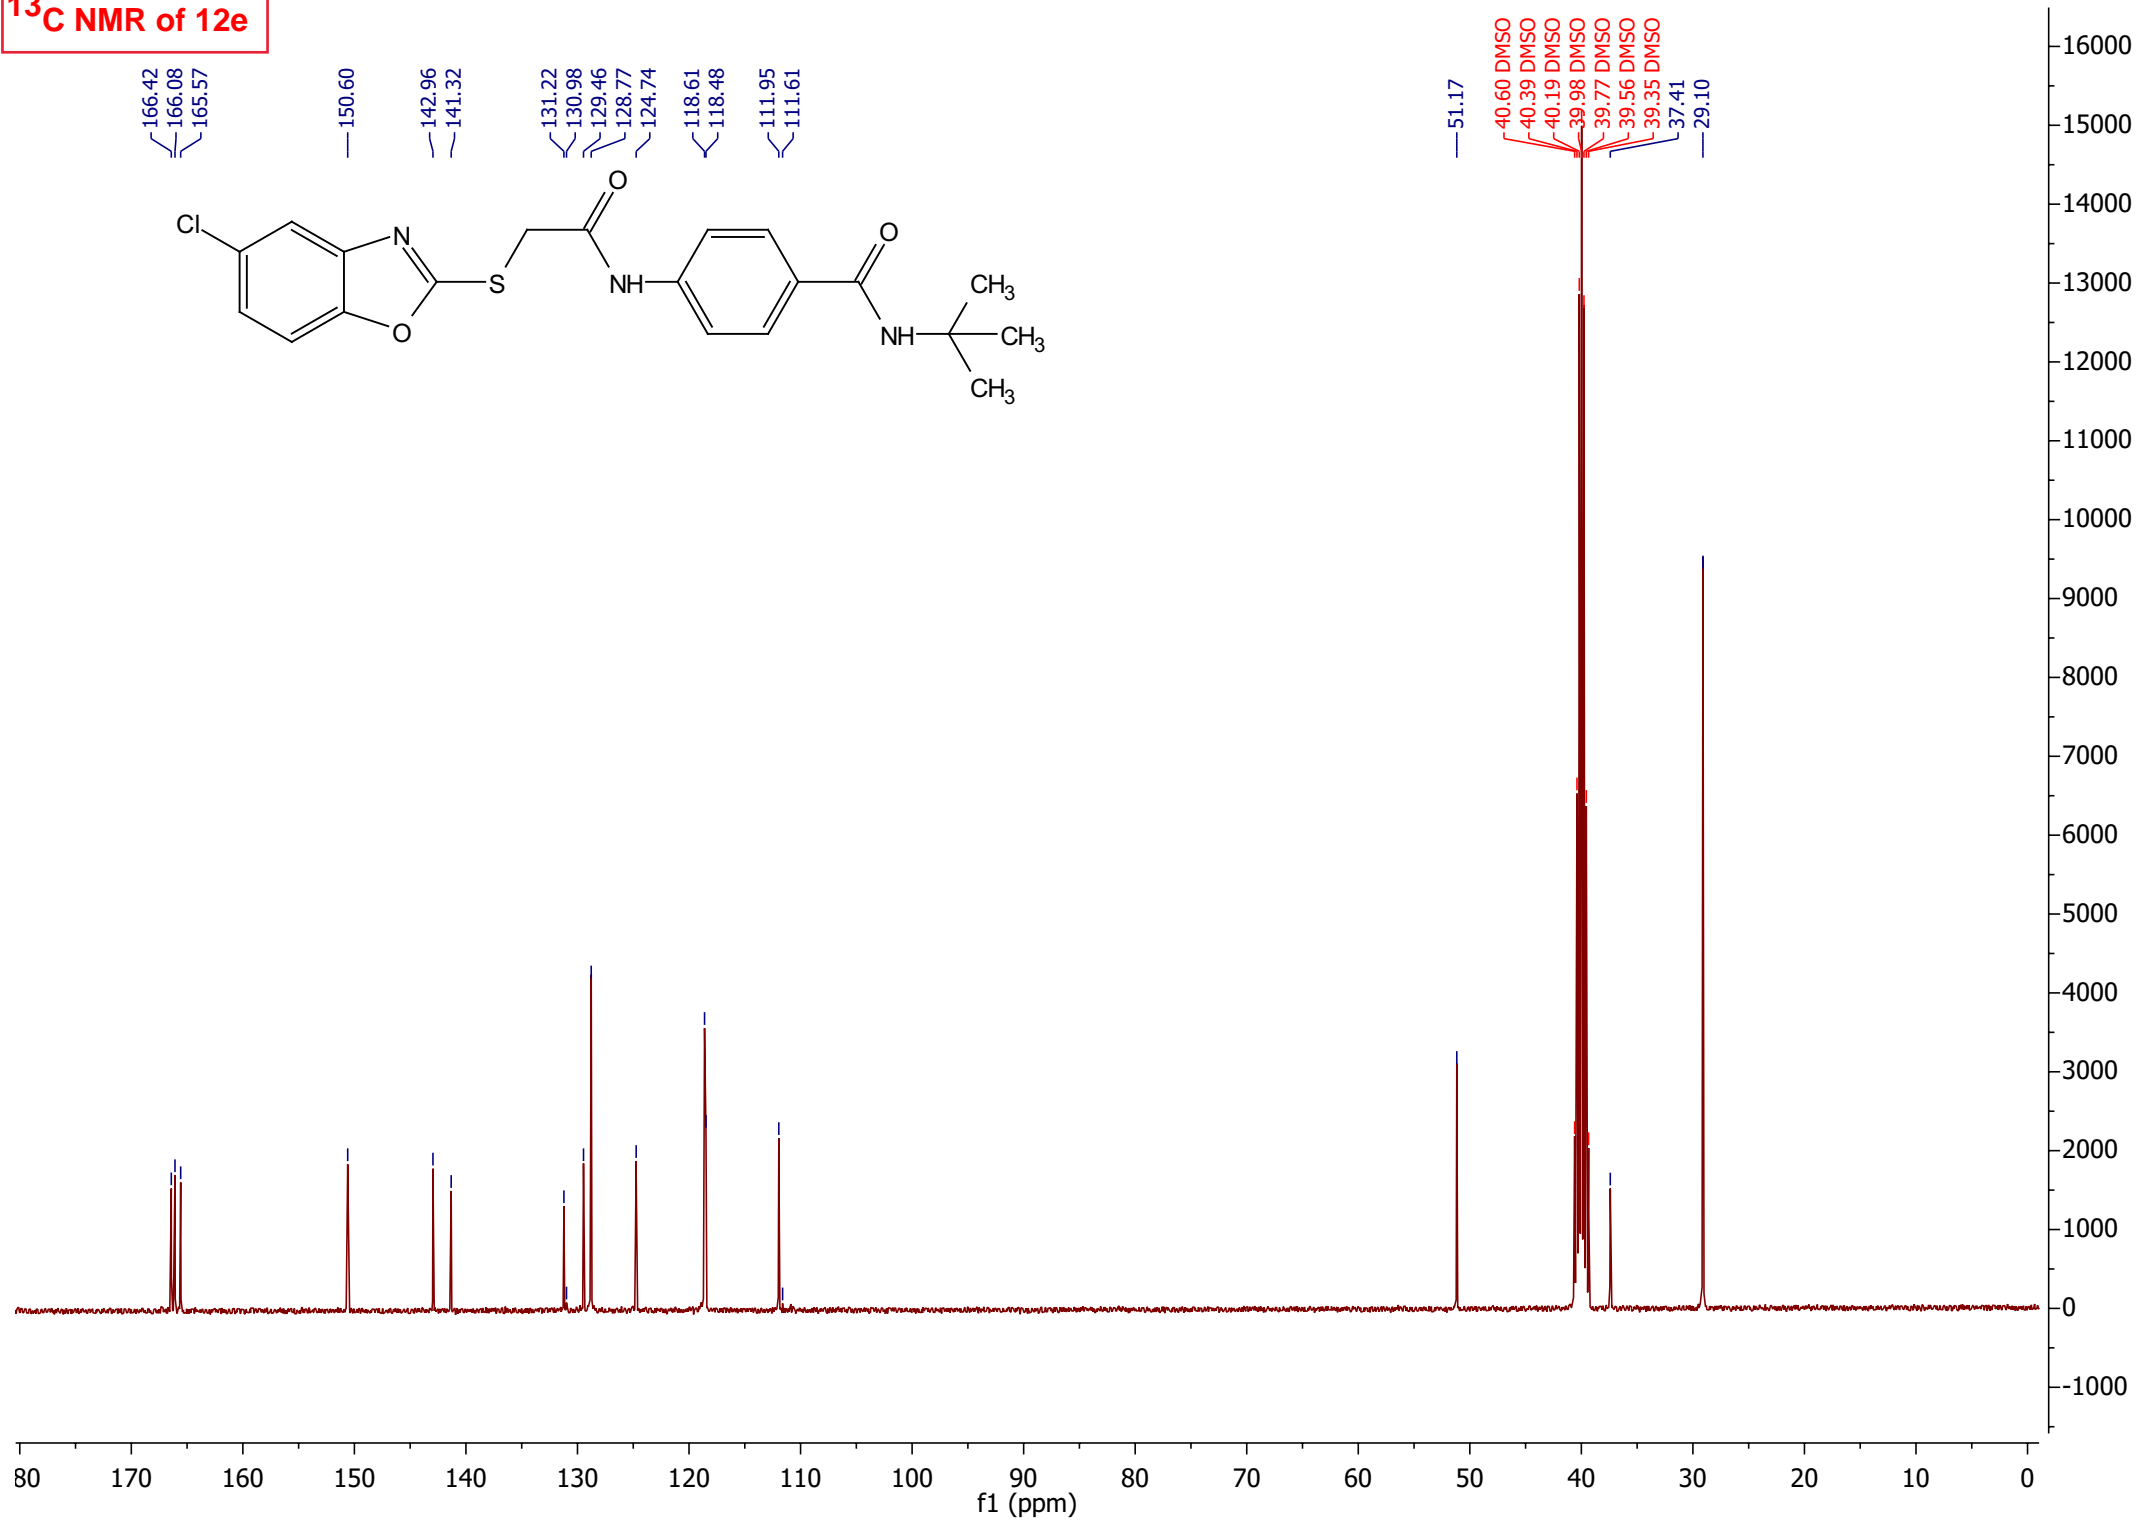

**<sup>13</sup>C NMR of 12e**

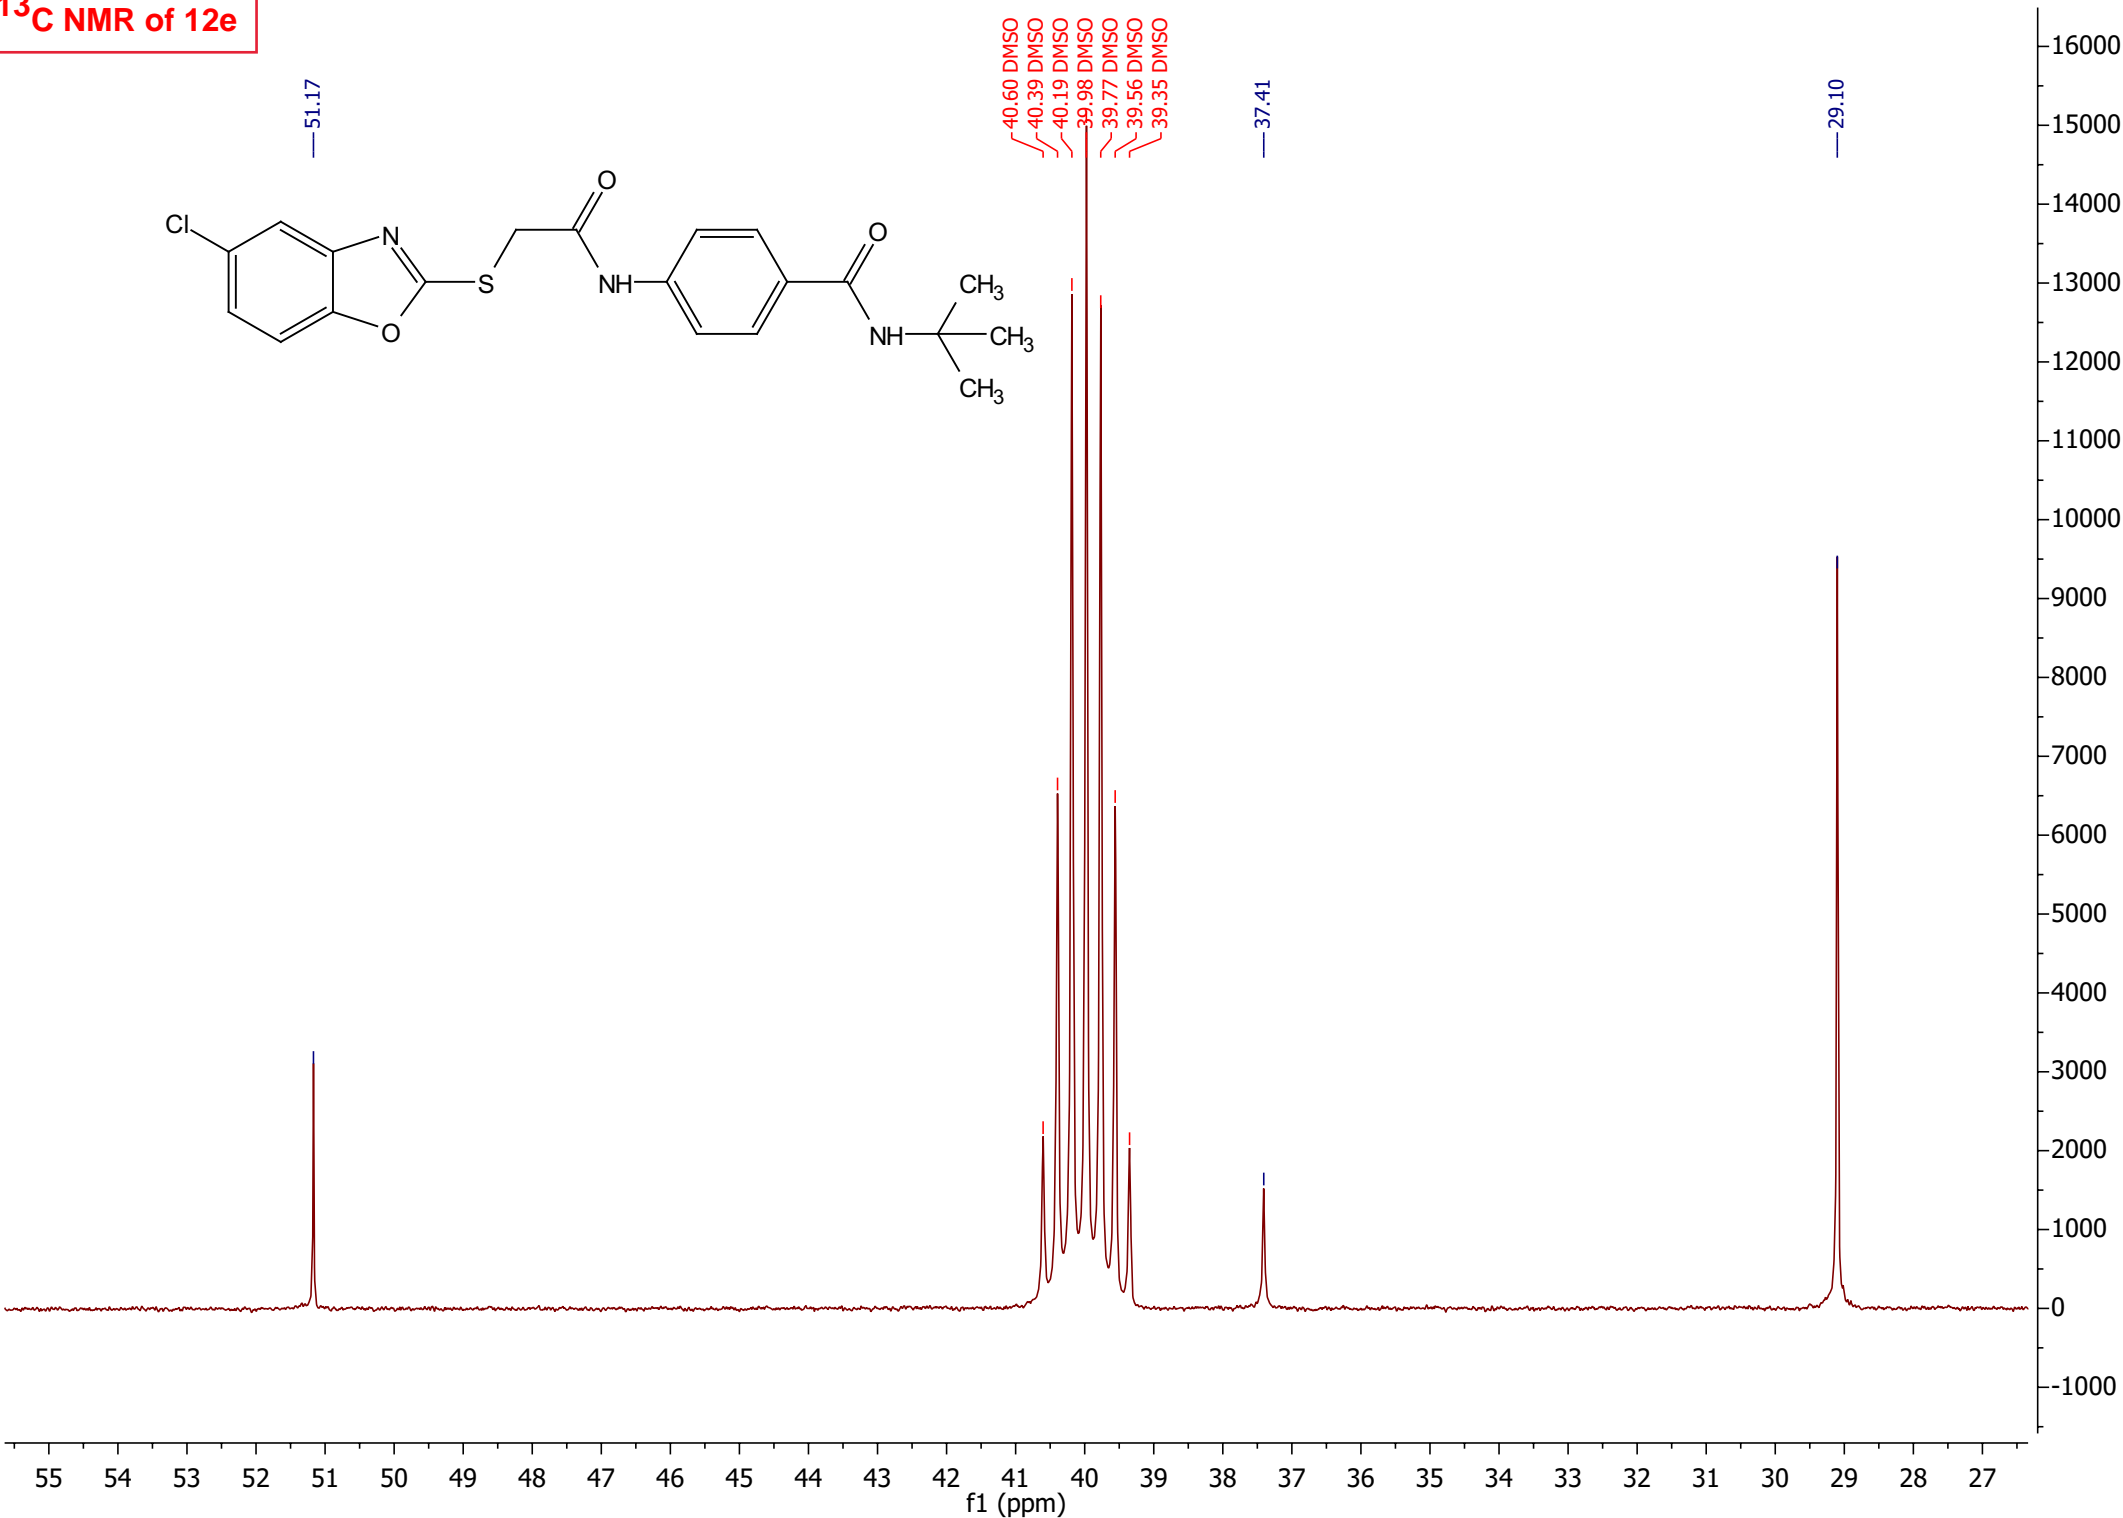

—51.17

40.60 DMSO  
40.39 DMSO  
40.19 DMSO  
39.98 DMSO  
39.77 DMSO  
39.56 DMSO  
39.35 DMSO

—37.41

—29.10

55 54 53 52 51 50 49 48 47 46 45 44 43 42 41 40 39 38 37 36 35 34 33 32 31 30 29 28 27

f1 (ppm)

**<sup>13</sup>C NMR of 12e**

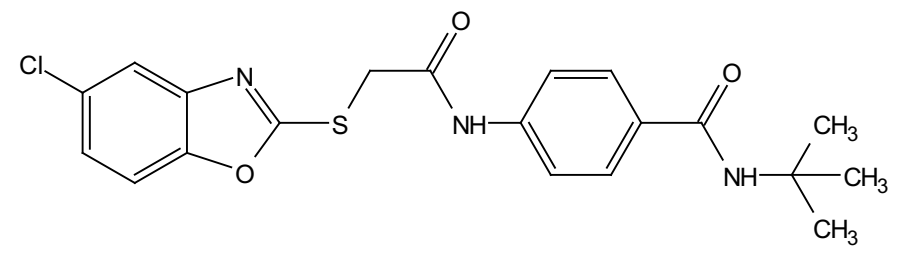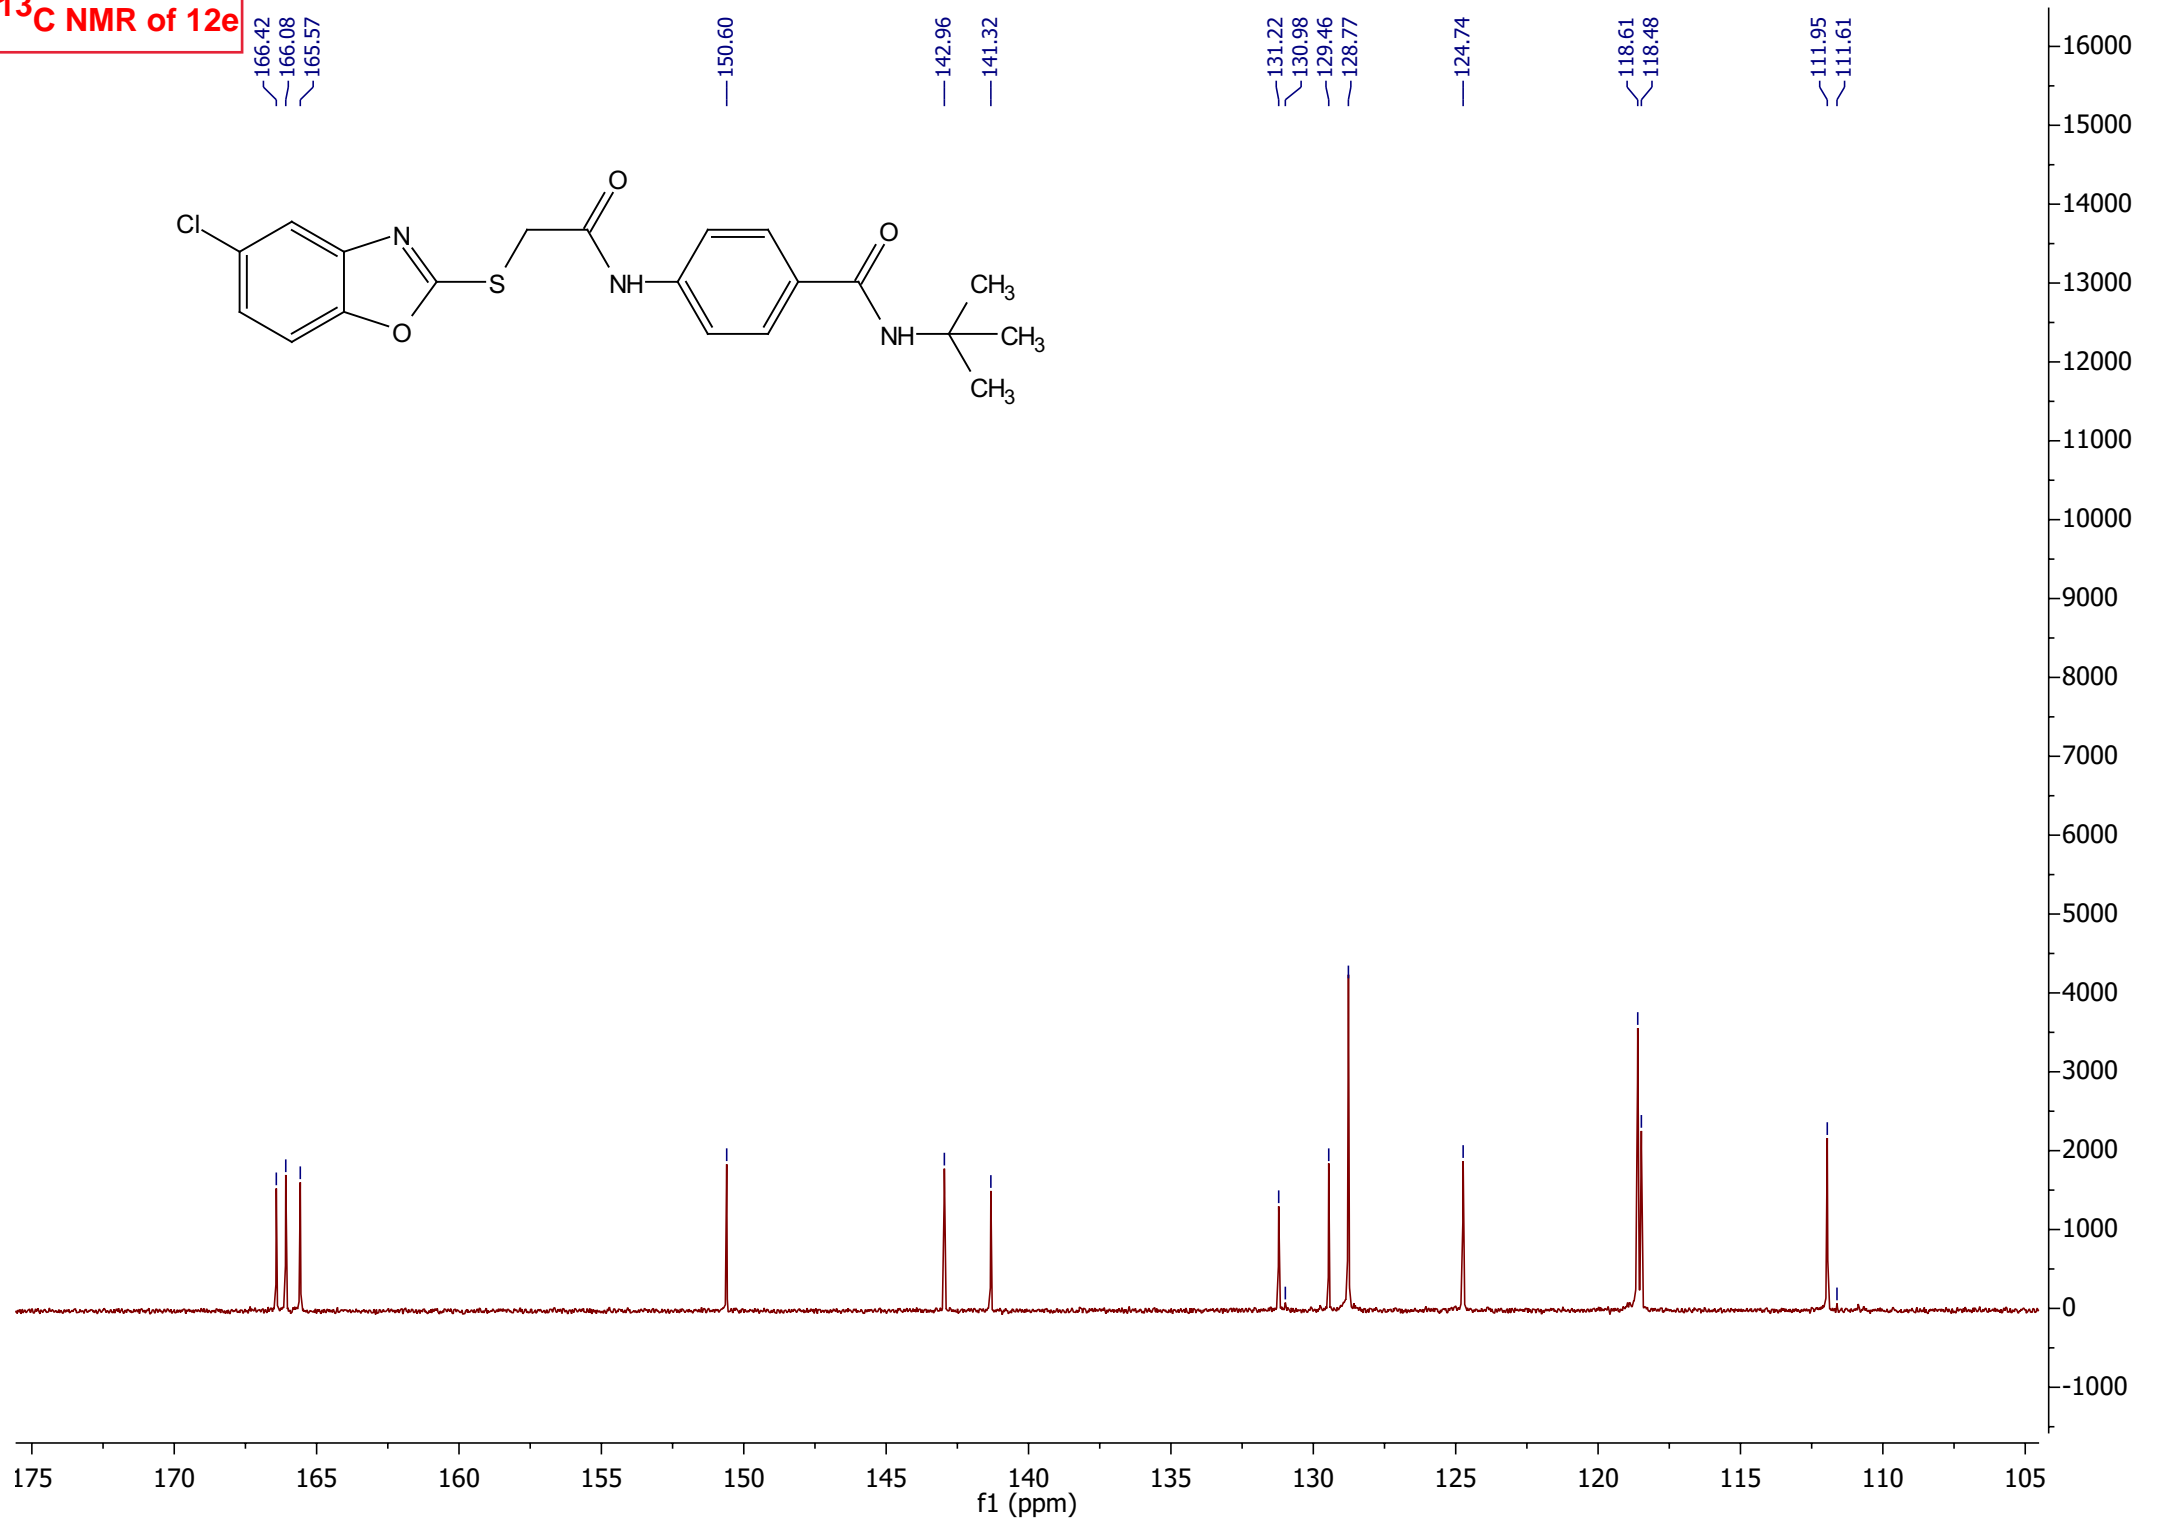



# IR Of Comp. 12f

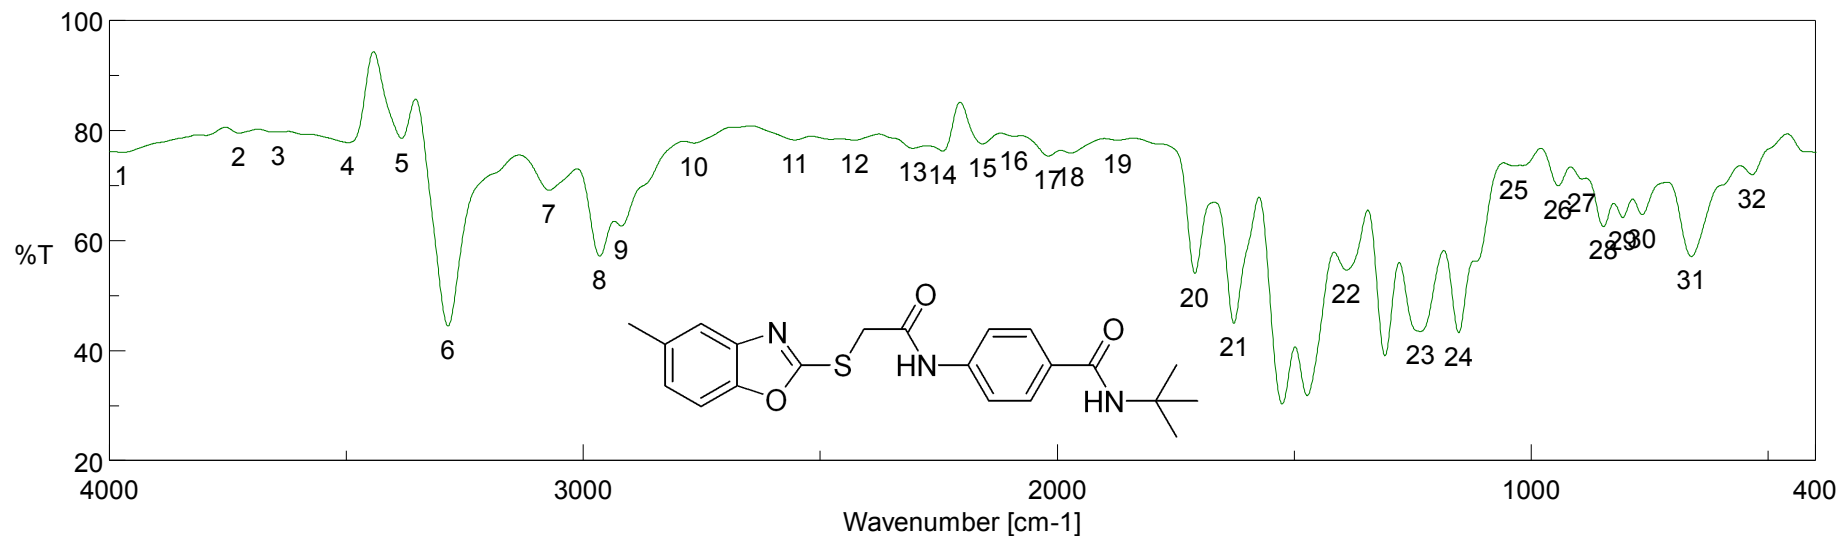

## [ Result of Peak Picking ]

| No. | Position | Intensity | No. | Position | Intensity | No. | Position | Intensity | No. | Position | Intensity |
|-----|----------|-----------|-----|----------|-----------|-----|----------|-----------|-----|----------|-----------|
| 1   | 3973.61  | 76.0057   | 2   | 3726.76  | 79.4803   | 3   | 3643.84  | 79.6679   | 4   | 3496.31  | 77.7767   |
| 5   | 3383.5   | 78.5136   | 6   | 3286.11  | 44.4572   | 7   | 3072.05  | 69.1118   | 8   | 2965.98  | 57.1068   |
| 9   | 2919.7   | 62.6076   | 10  | 2766.39  | 77.6778   | 11  | 2553.29  | 78.2467   | 12  | 2427.94  | 78.2195   |
| 13  | 2304.52  | 76.727    | 14  | 2241.84  | 76.2221   | 15  | 2157.95  | 77.5339   | 16  | 2091.42  | 78.9065   |
| 17  | 2019.1   | 75.3331   | 18  | 1971.86  | 75.8492   | 19  | 1872.54  | 78.199    | 20  | 1709.59  | 53.994    |
| 21  | 1626.66  | 44.9623   | 22  | 1389.46  | 54.5873   | 23  | 1233.25  | 43.4485   | 24  | 1152.26  | 43.242    |
| 25  | 1036.55  | 73.5466   | 26  | 943.02   | 69.9137   | 27  | 892.88   | 71.1529   | 28  | 846.597  | 62.5262   |
| 29  | 806.099  | 64.142    | 30  | 765.601  | 64.6793   | 31  | 661.464  | 57.0638   | 32  | 533.221  | 71.9242   |

**<sup>1</sup>H NMR of 12f**

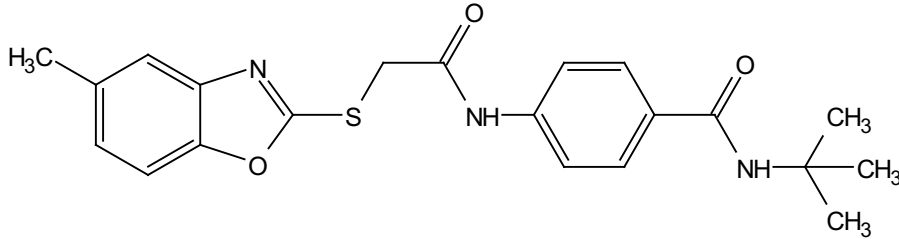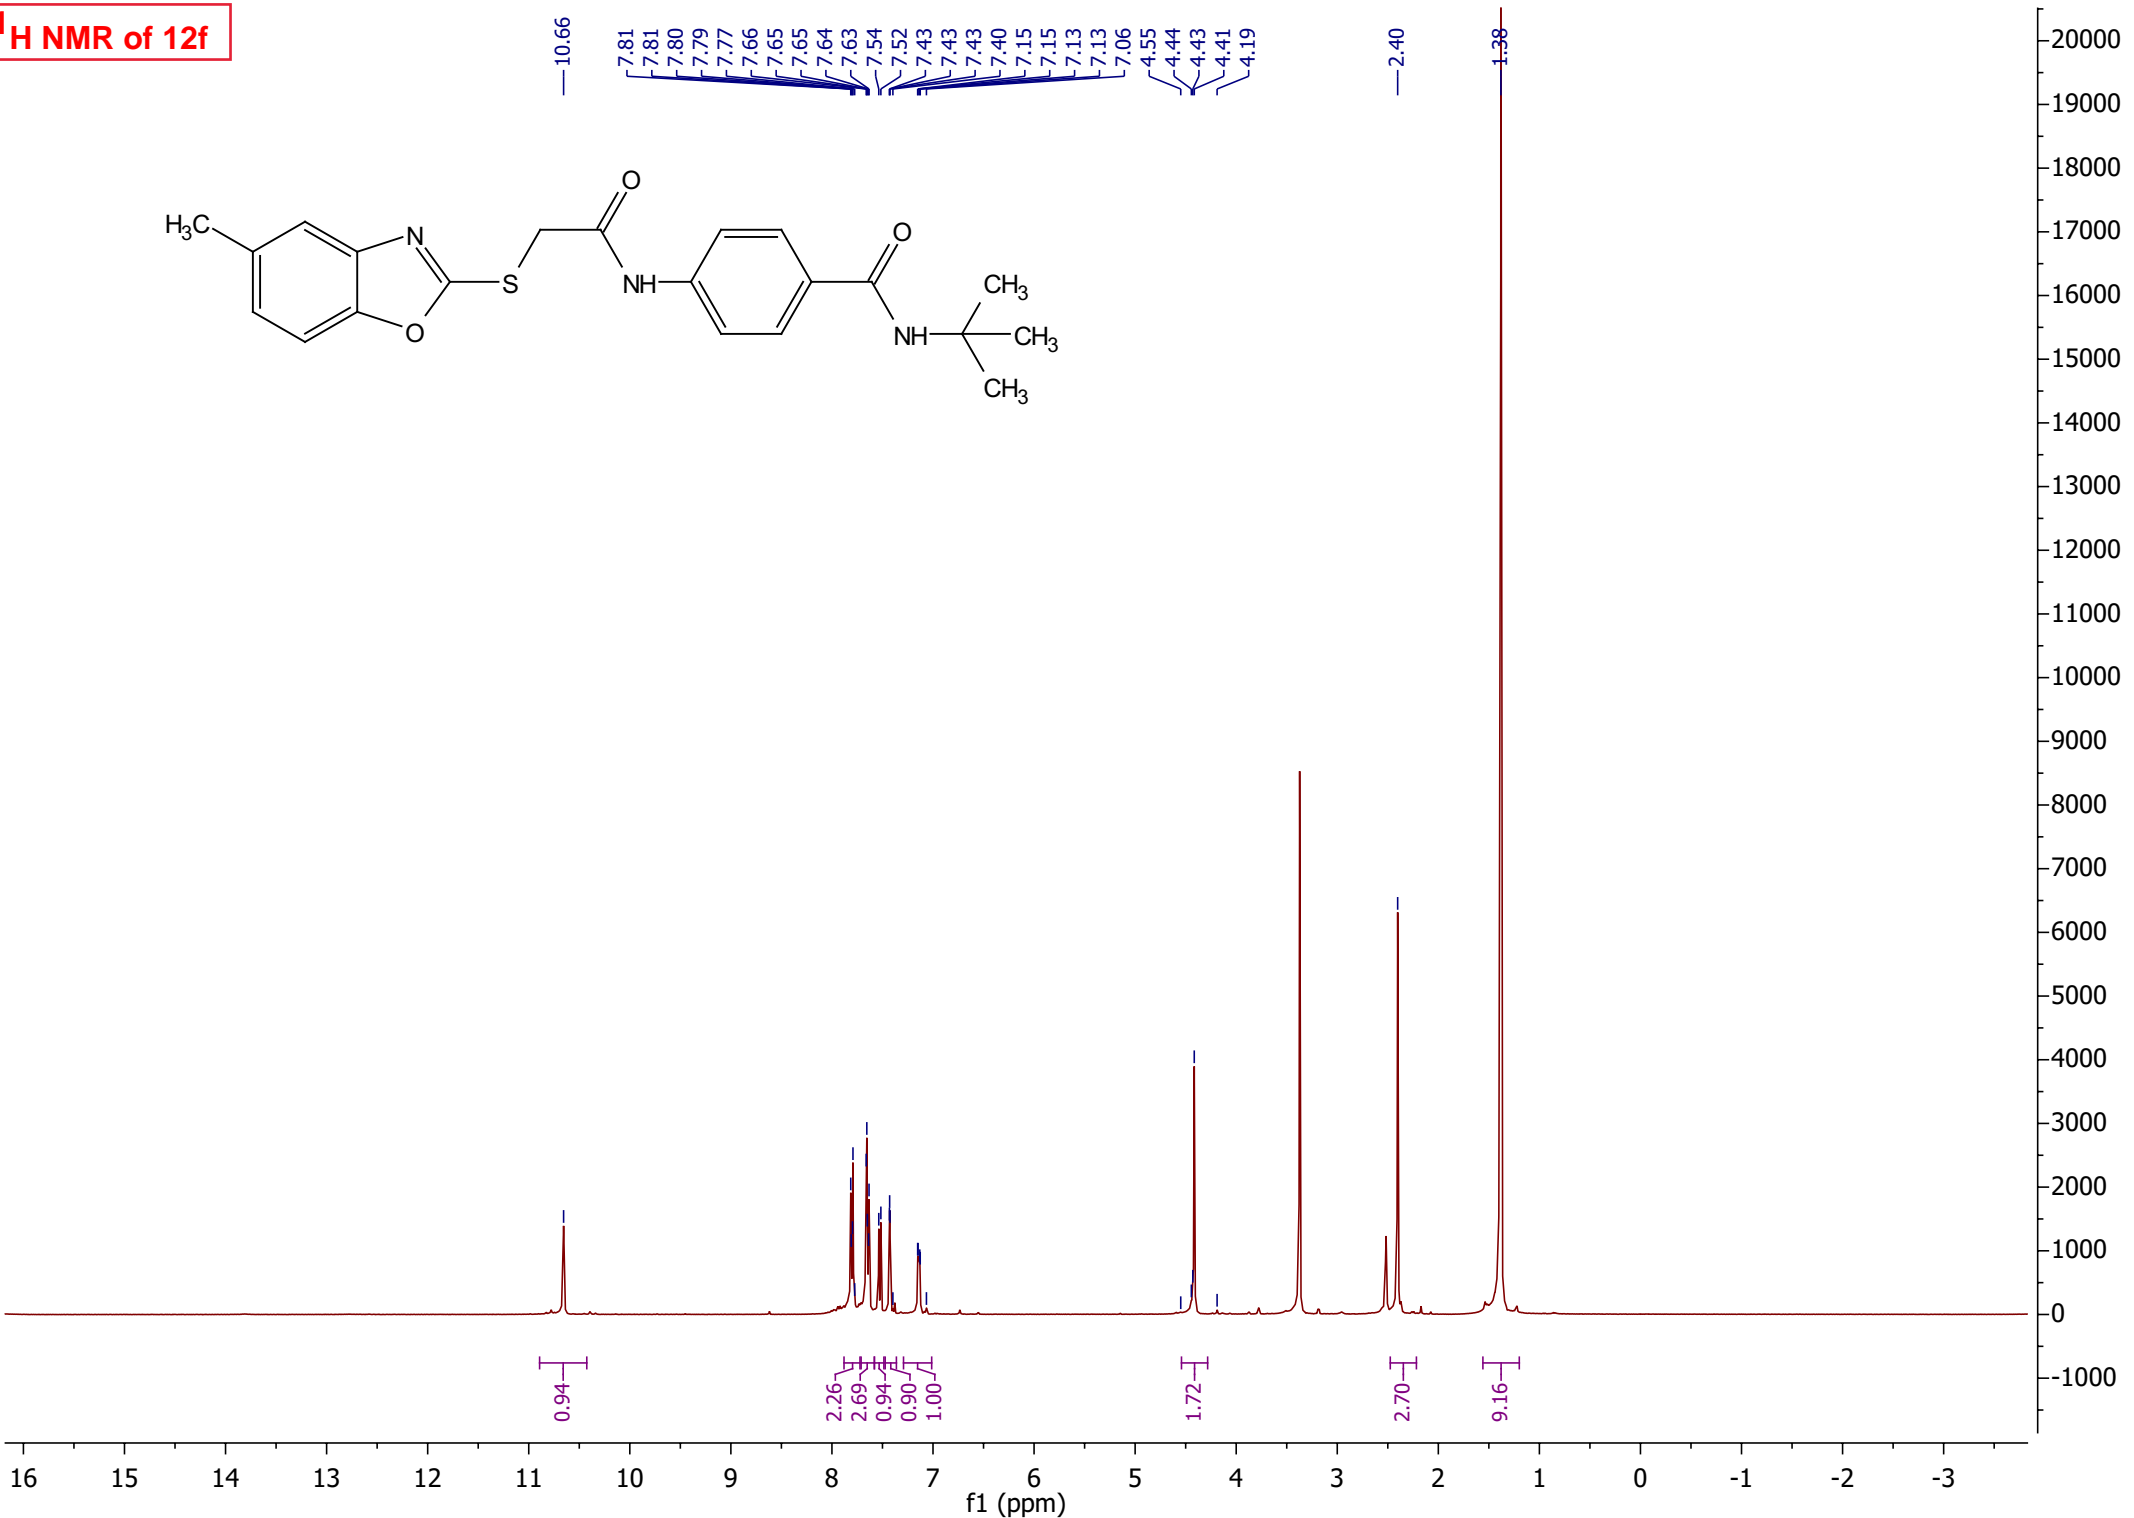

**<sup>1</sup>H NMR of 12f**



4.55  
4.44  
4.43  
4.41  
4.19

2.40

1.38

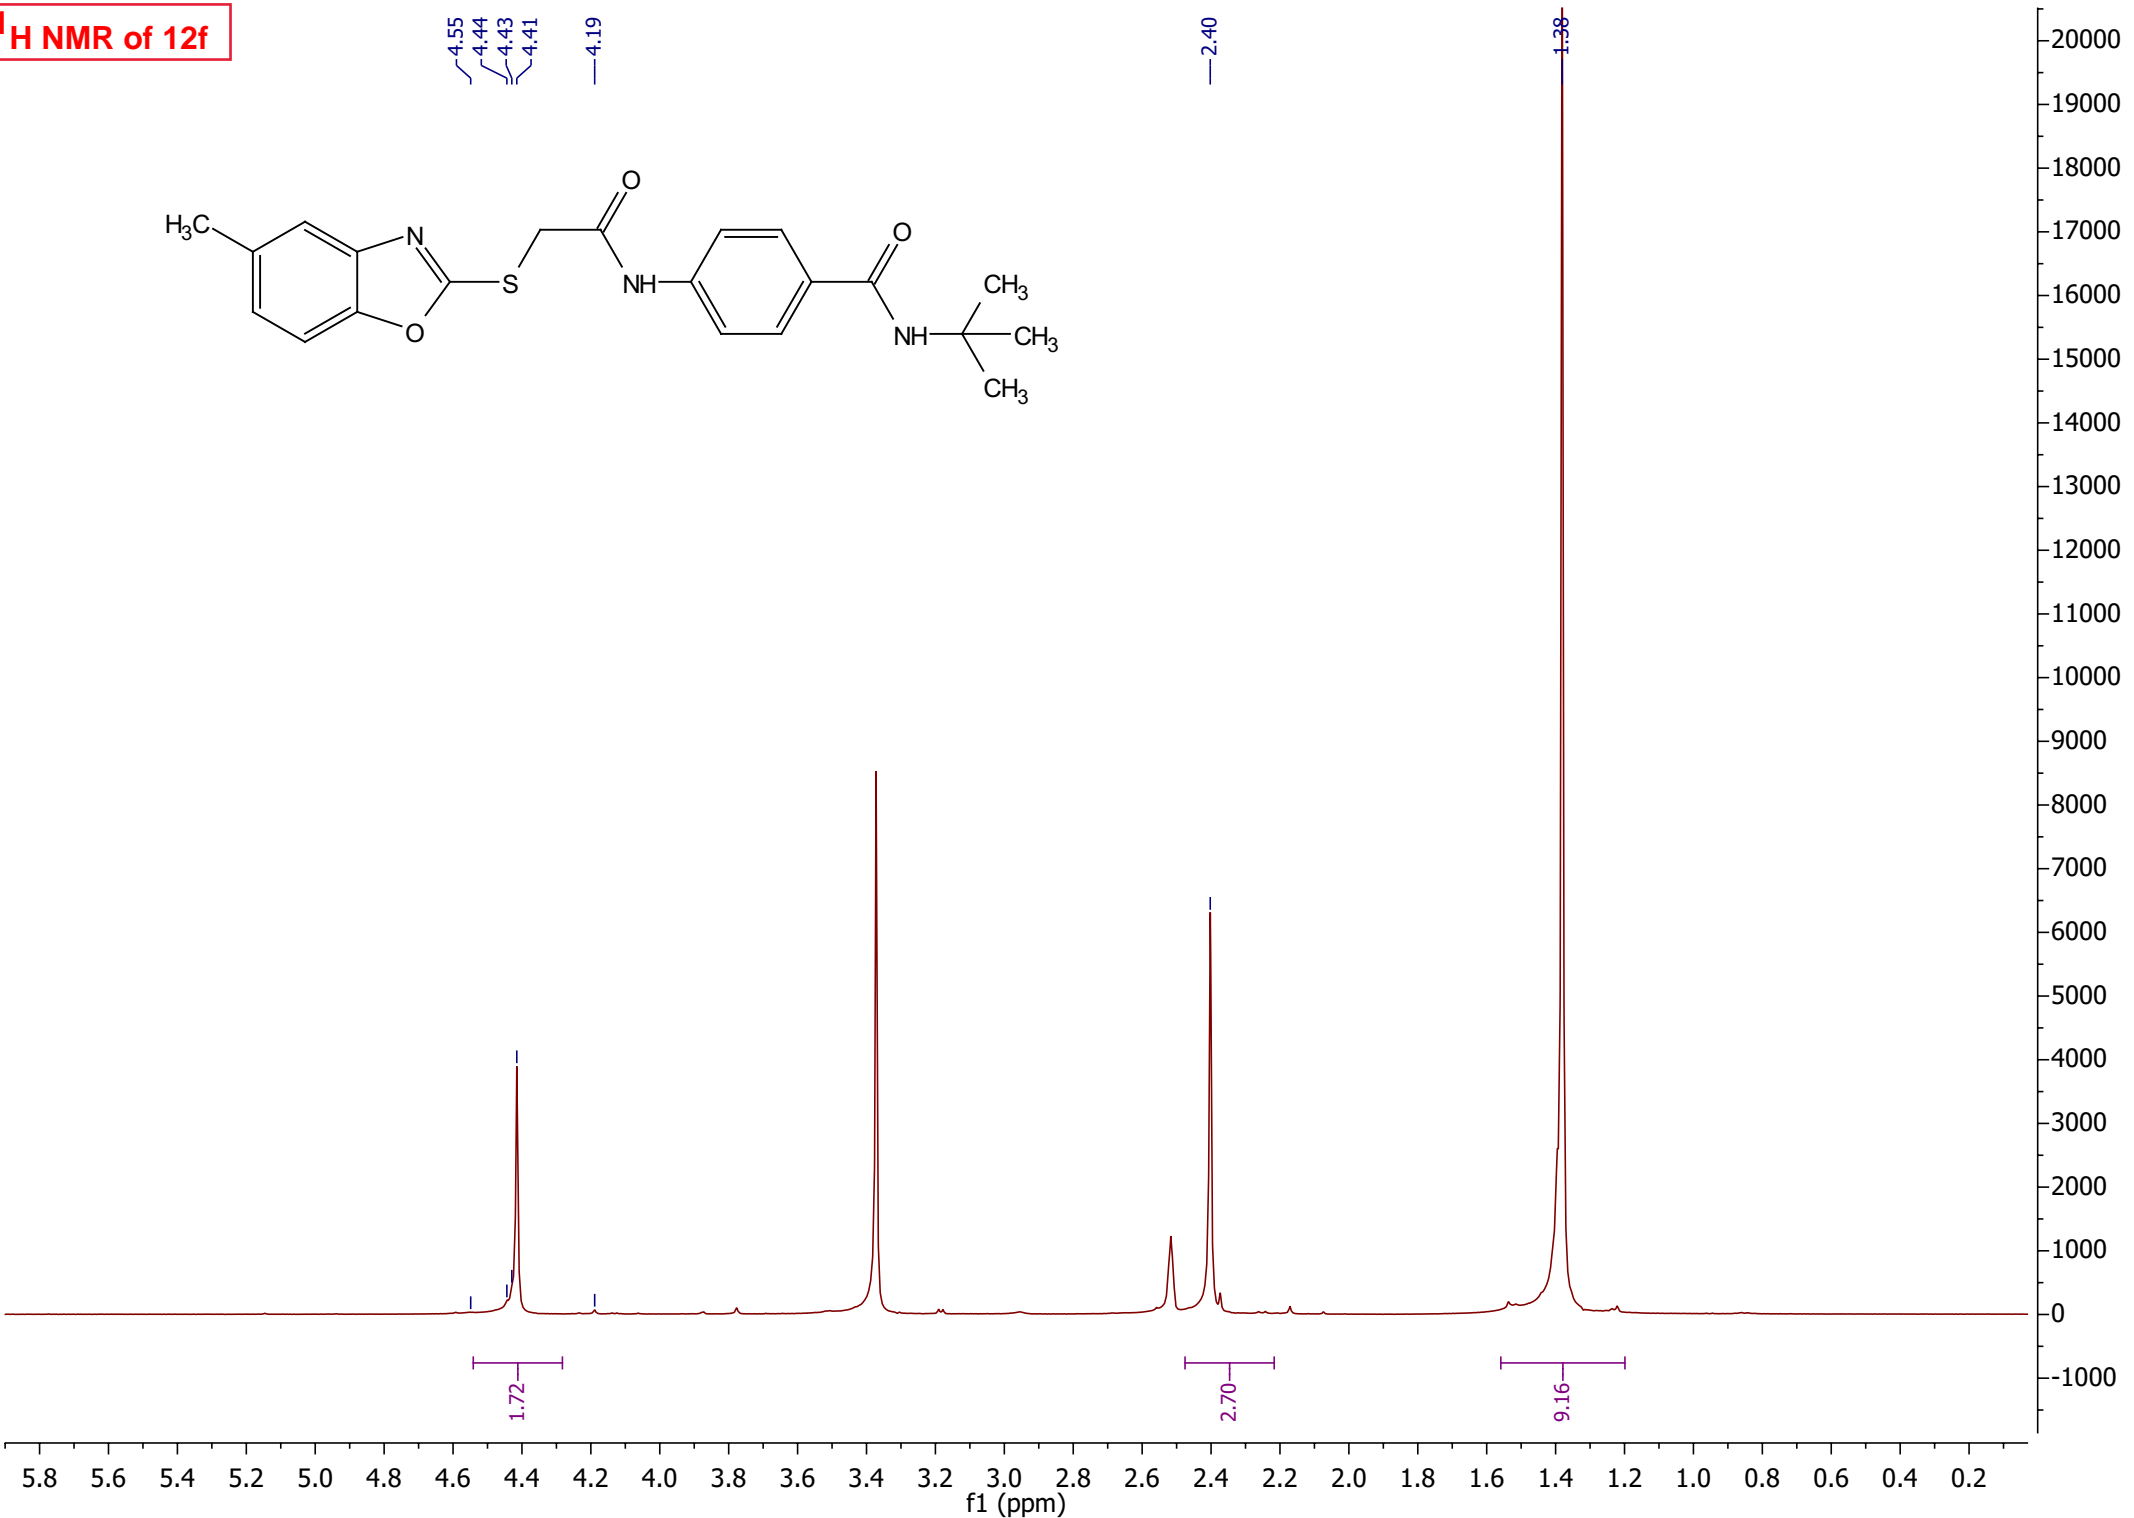

**<sup>1</sup>H NMR of 12f**



7.81  
7.81  
7.80  
7.79  
7.77

7.66  
7.65  
7.65  
7.64  
7.63

7.54  
7.52

7.43  
7.43  
7.43  
7.40

7.15  
7.15  
7.13  
7.13

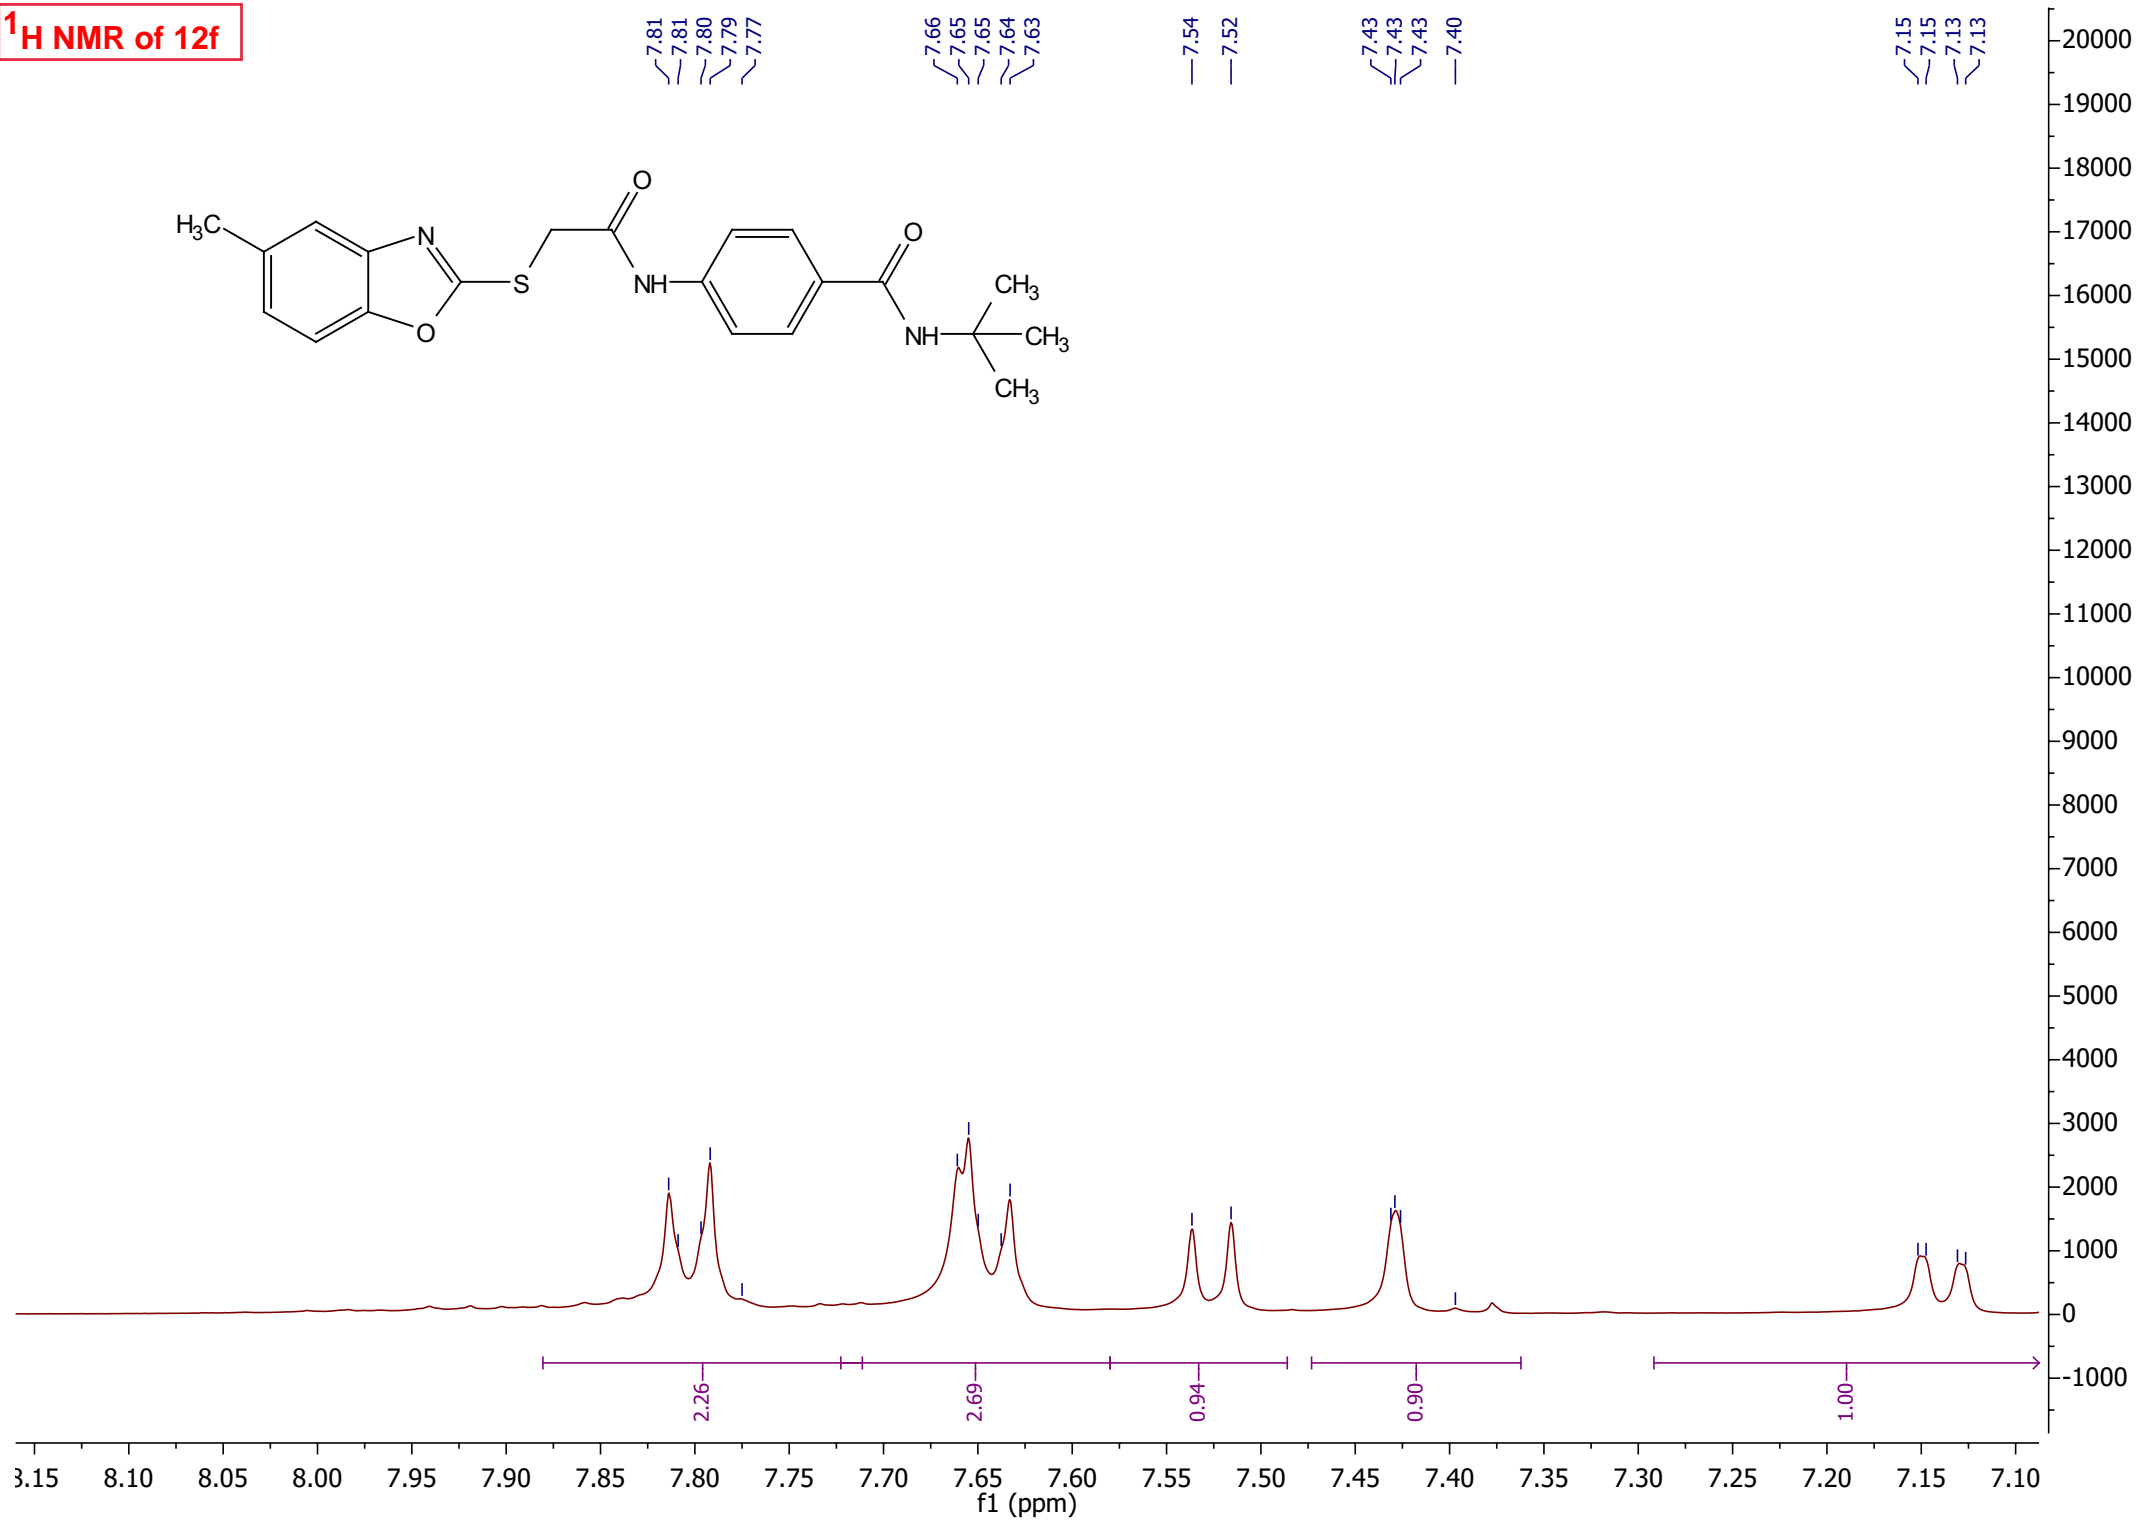

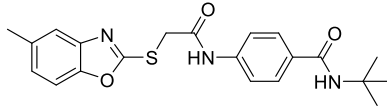

Mass spec. of 12f

RT: 0.00 - 3.23 SM: 7G

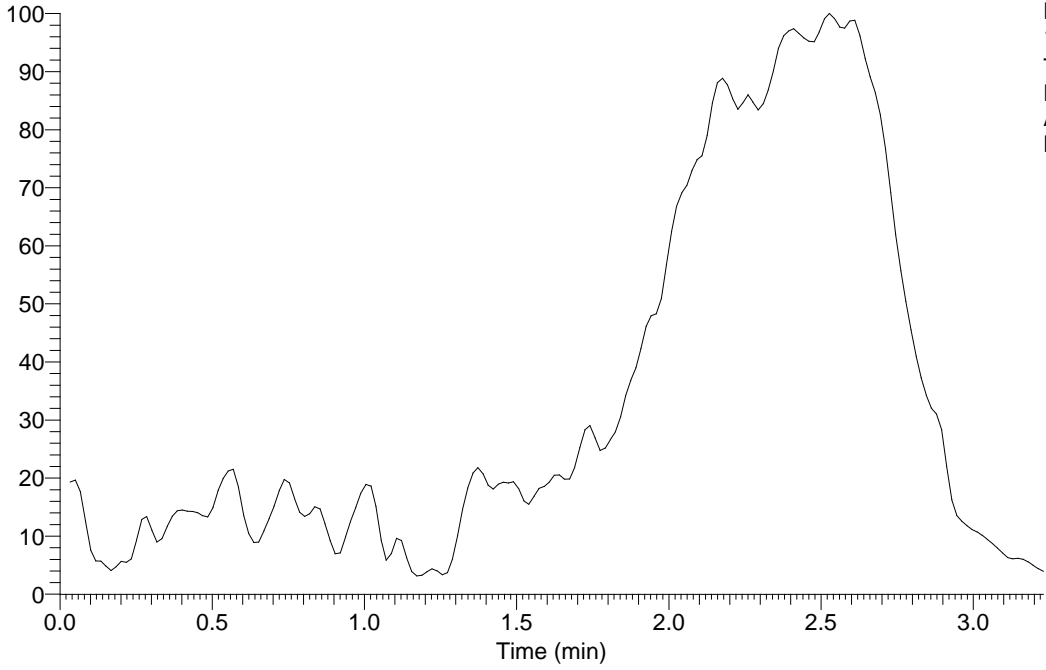

NL:  
1.82E5  
TIC MS  
Hazem-  
Abdelhady-  
MBA35

Hazem-Abdelhady-MBA35 #171 RT: 2.88 AV: 1 NL: 1.68E4  
T: + c EI Full ms [40.00-1000.00]

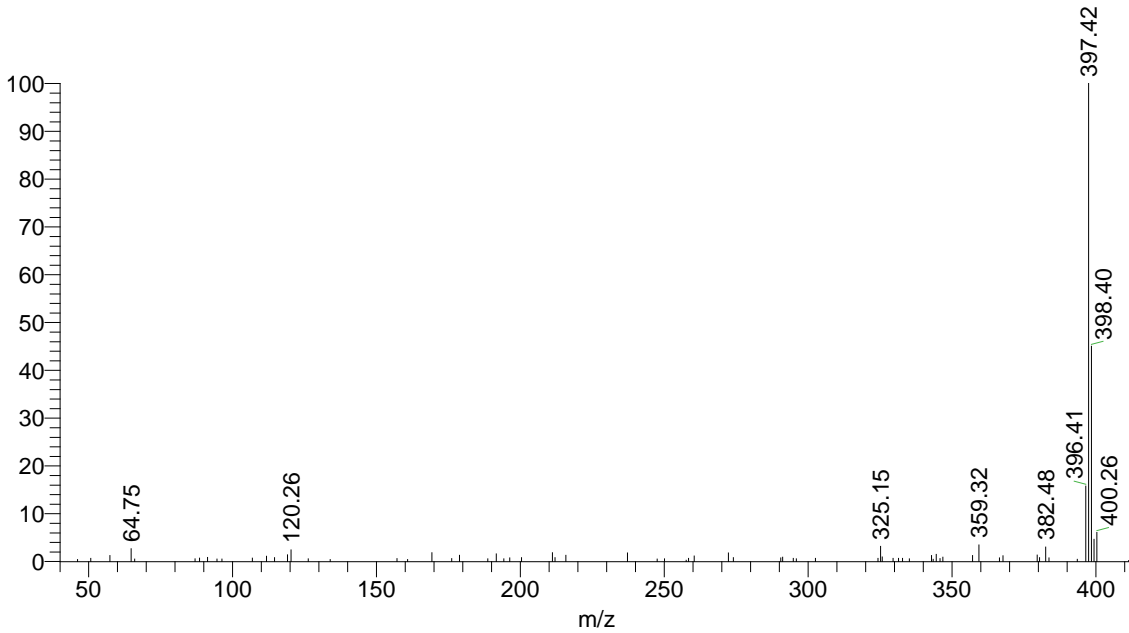

# IR Of Comp. 12g

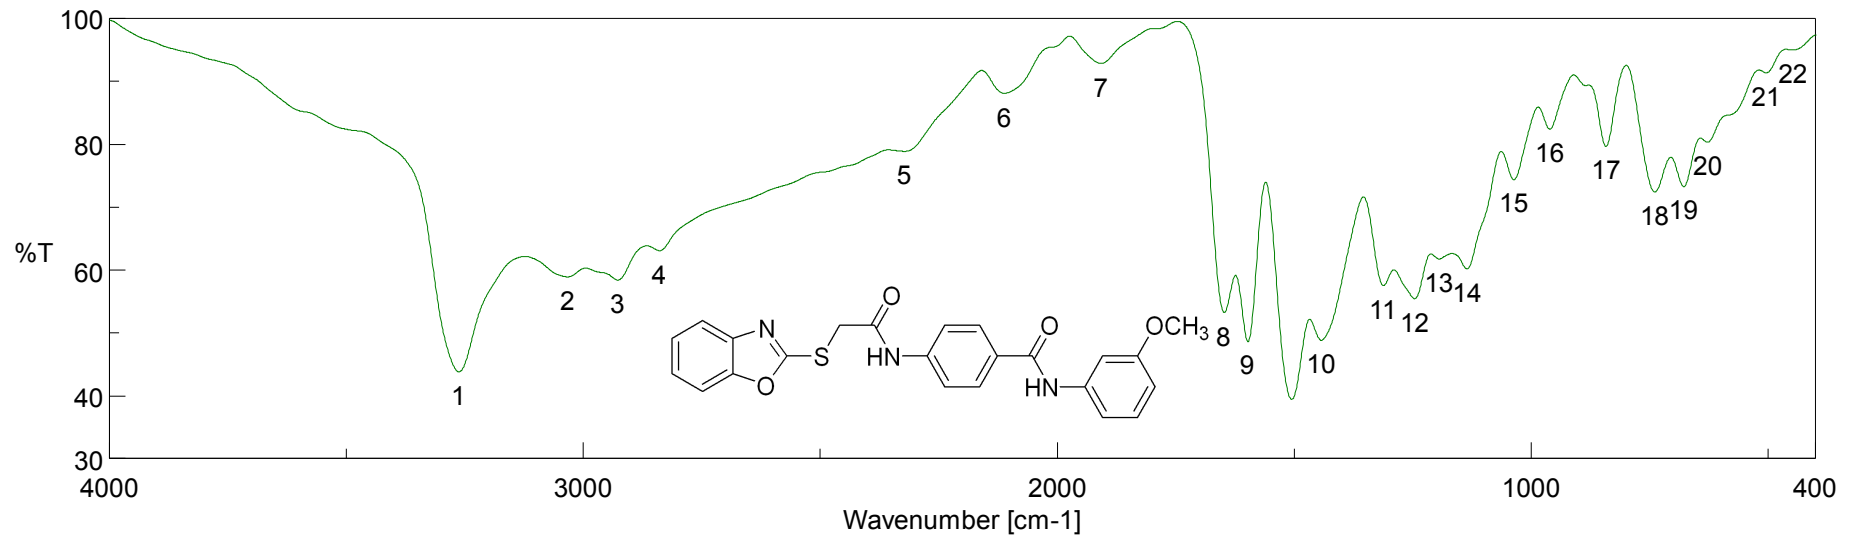

[ Result of Peak Picking ]

| No. | Position | Intensity | No. | Position | Intensity | No. | Position | Intensity | No. | Position | Intensity |
|-----|----------|-----------|-----|----------|-----------|-----|----------|-----------|-----|----------|-----------|
| 1   | 3262.97  | 43.7759   | 2   | 3033.48  | 58.8719   | 3   | 2927.41  | 58.3647   | 4   | 2839.67  | 63.038    |
| 5   | 2321.87  | 78.8344   | 6   | 2111.67  | 88.059    | 7   | 1907.25  | 92.8002   | 8   | 1647.88  | 53.2061   |
| 9   | 1597.73  | 48.5754   | 10  | 1442.49  | 48.7845   | 11  | 1311.36  | 57.4677   | 12  | 1245.79  | 55.4101   |
| 13  | 1193.72  | 61.7122   | 14  | 1134.9   | 60.1479   | 15  | 1035.59  | 74.3341   | 16  | 960.377  | 82.3621   |
| 17  | 841.776  | 79.6231   | 18  | 738.603  | 72.3662   | 19  | 677.856  | 73.2267   | 20  | 626.752  | 80.2756   |
| 21  | 503.33   | 91.3321   | 22  | 447.404  | 94.9492   |     |          |           |     |          |           |

# <sup>1</sup>H NMR of 12g

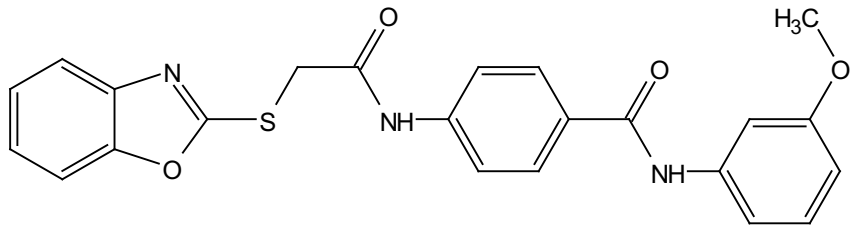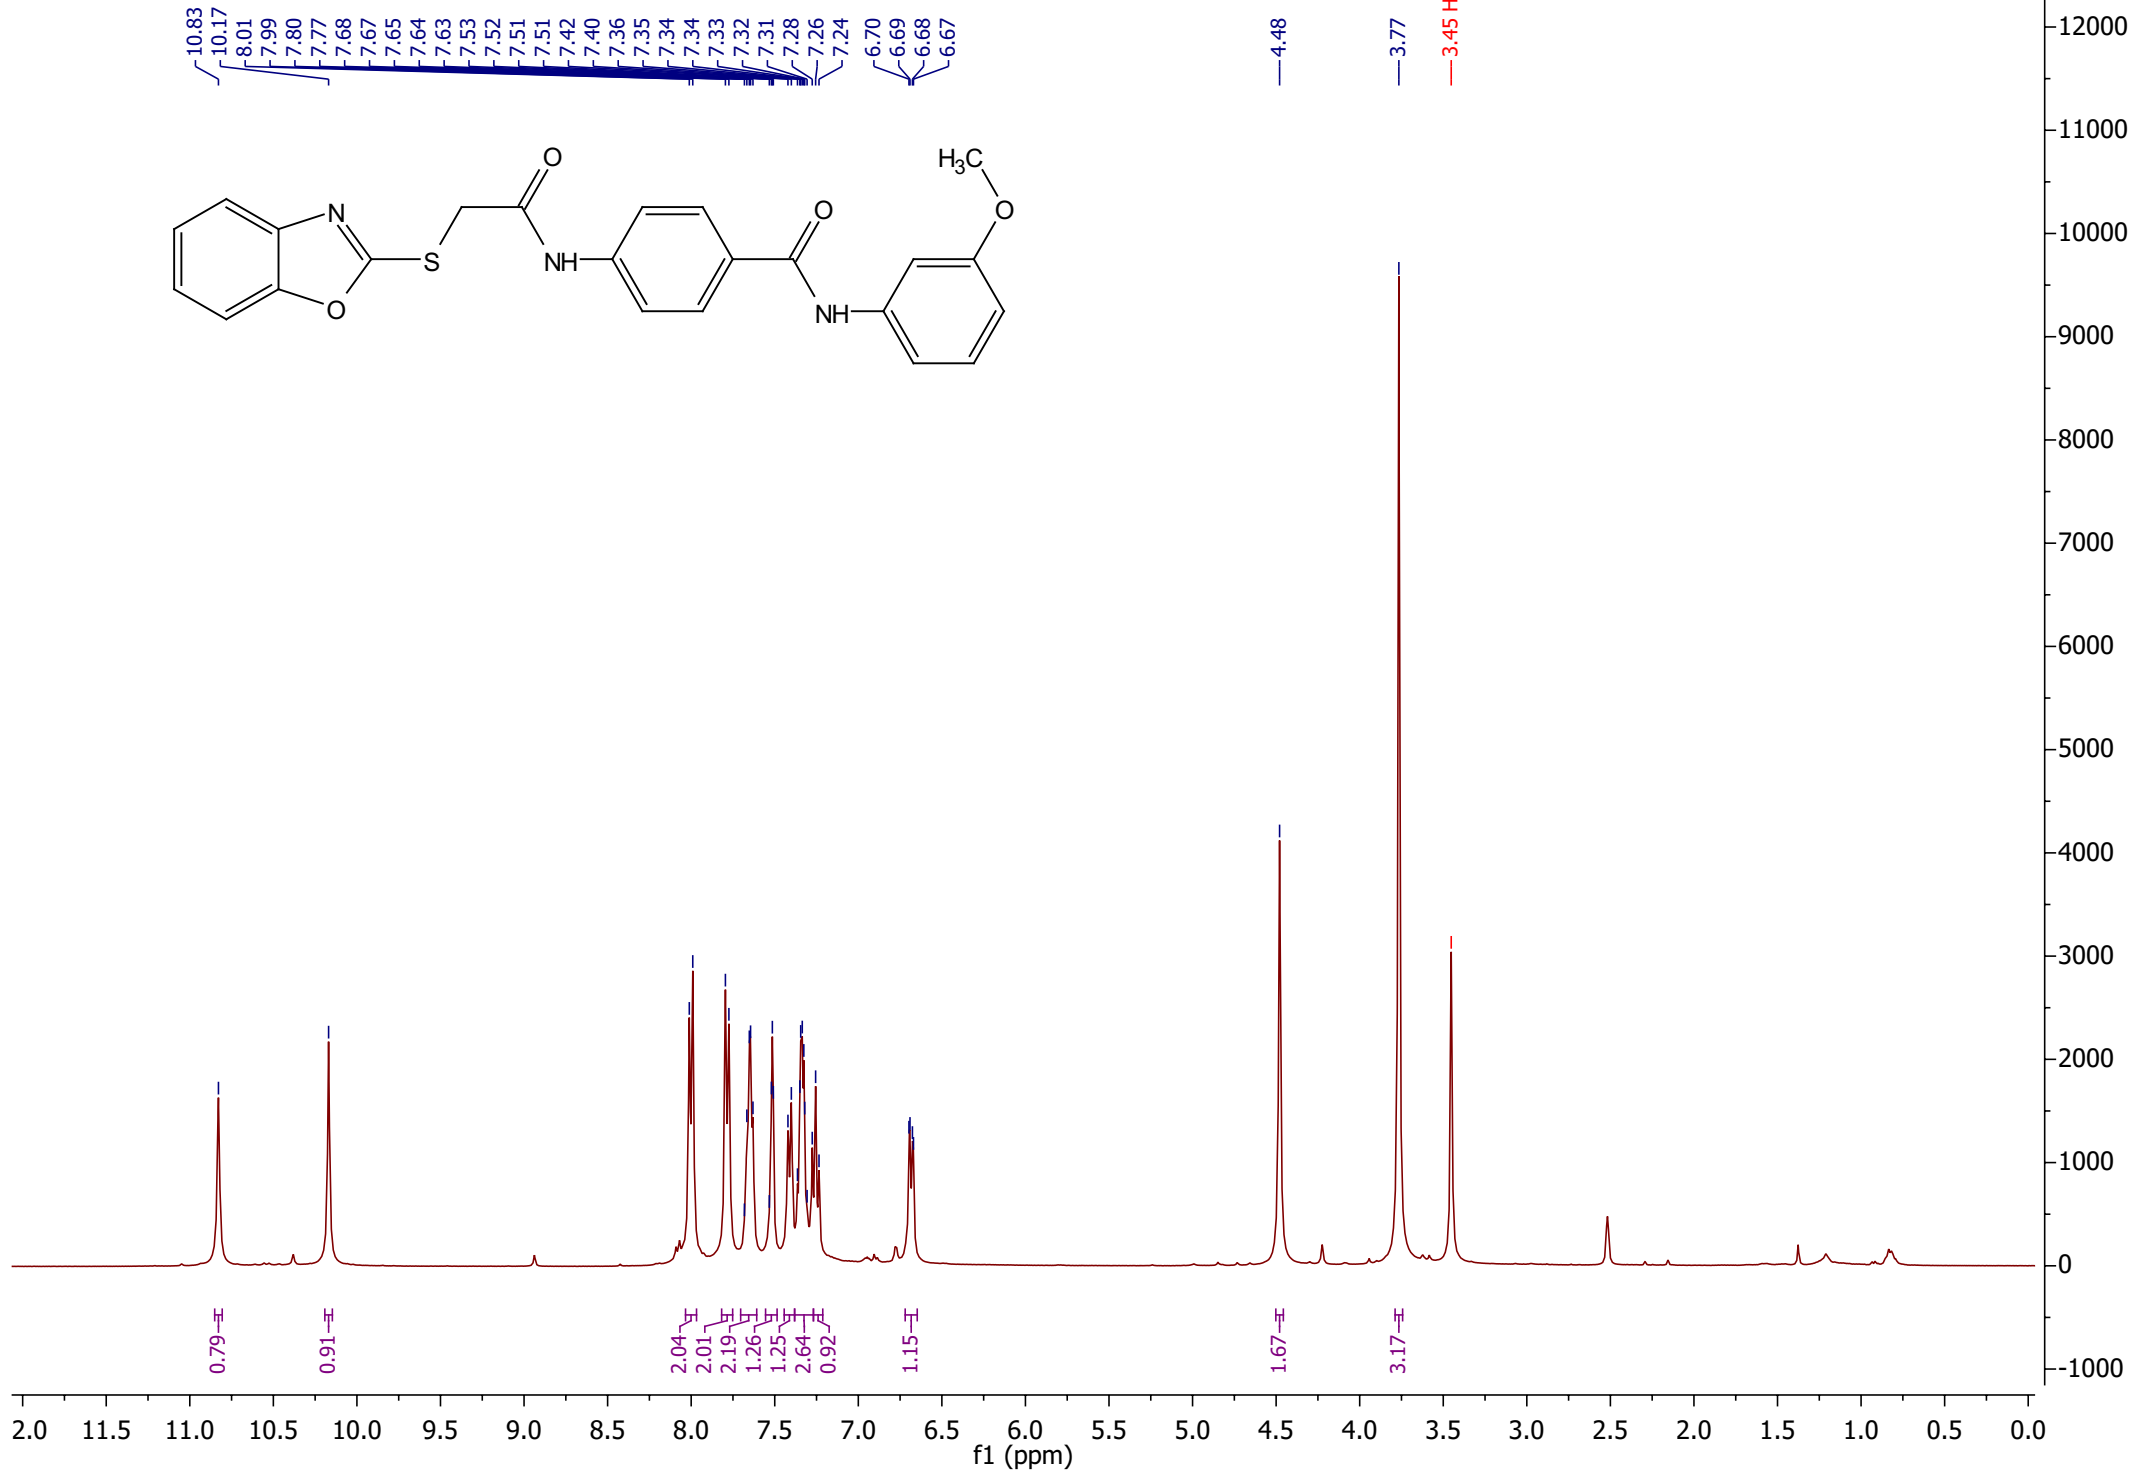

**<sup>1</sup>H NMR of 12g**

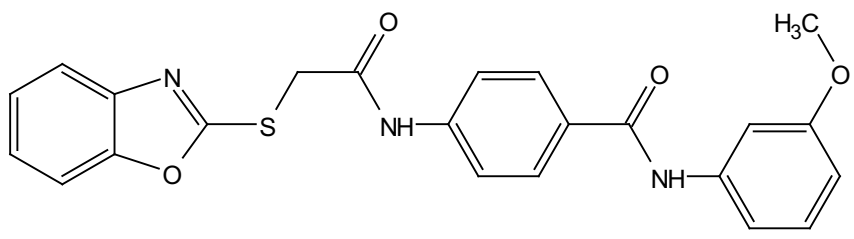

4.48

3.77

3.45 H<sub>2</sub>O

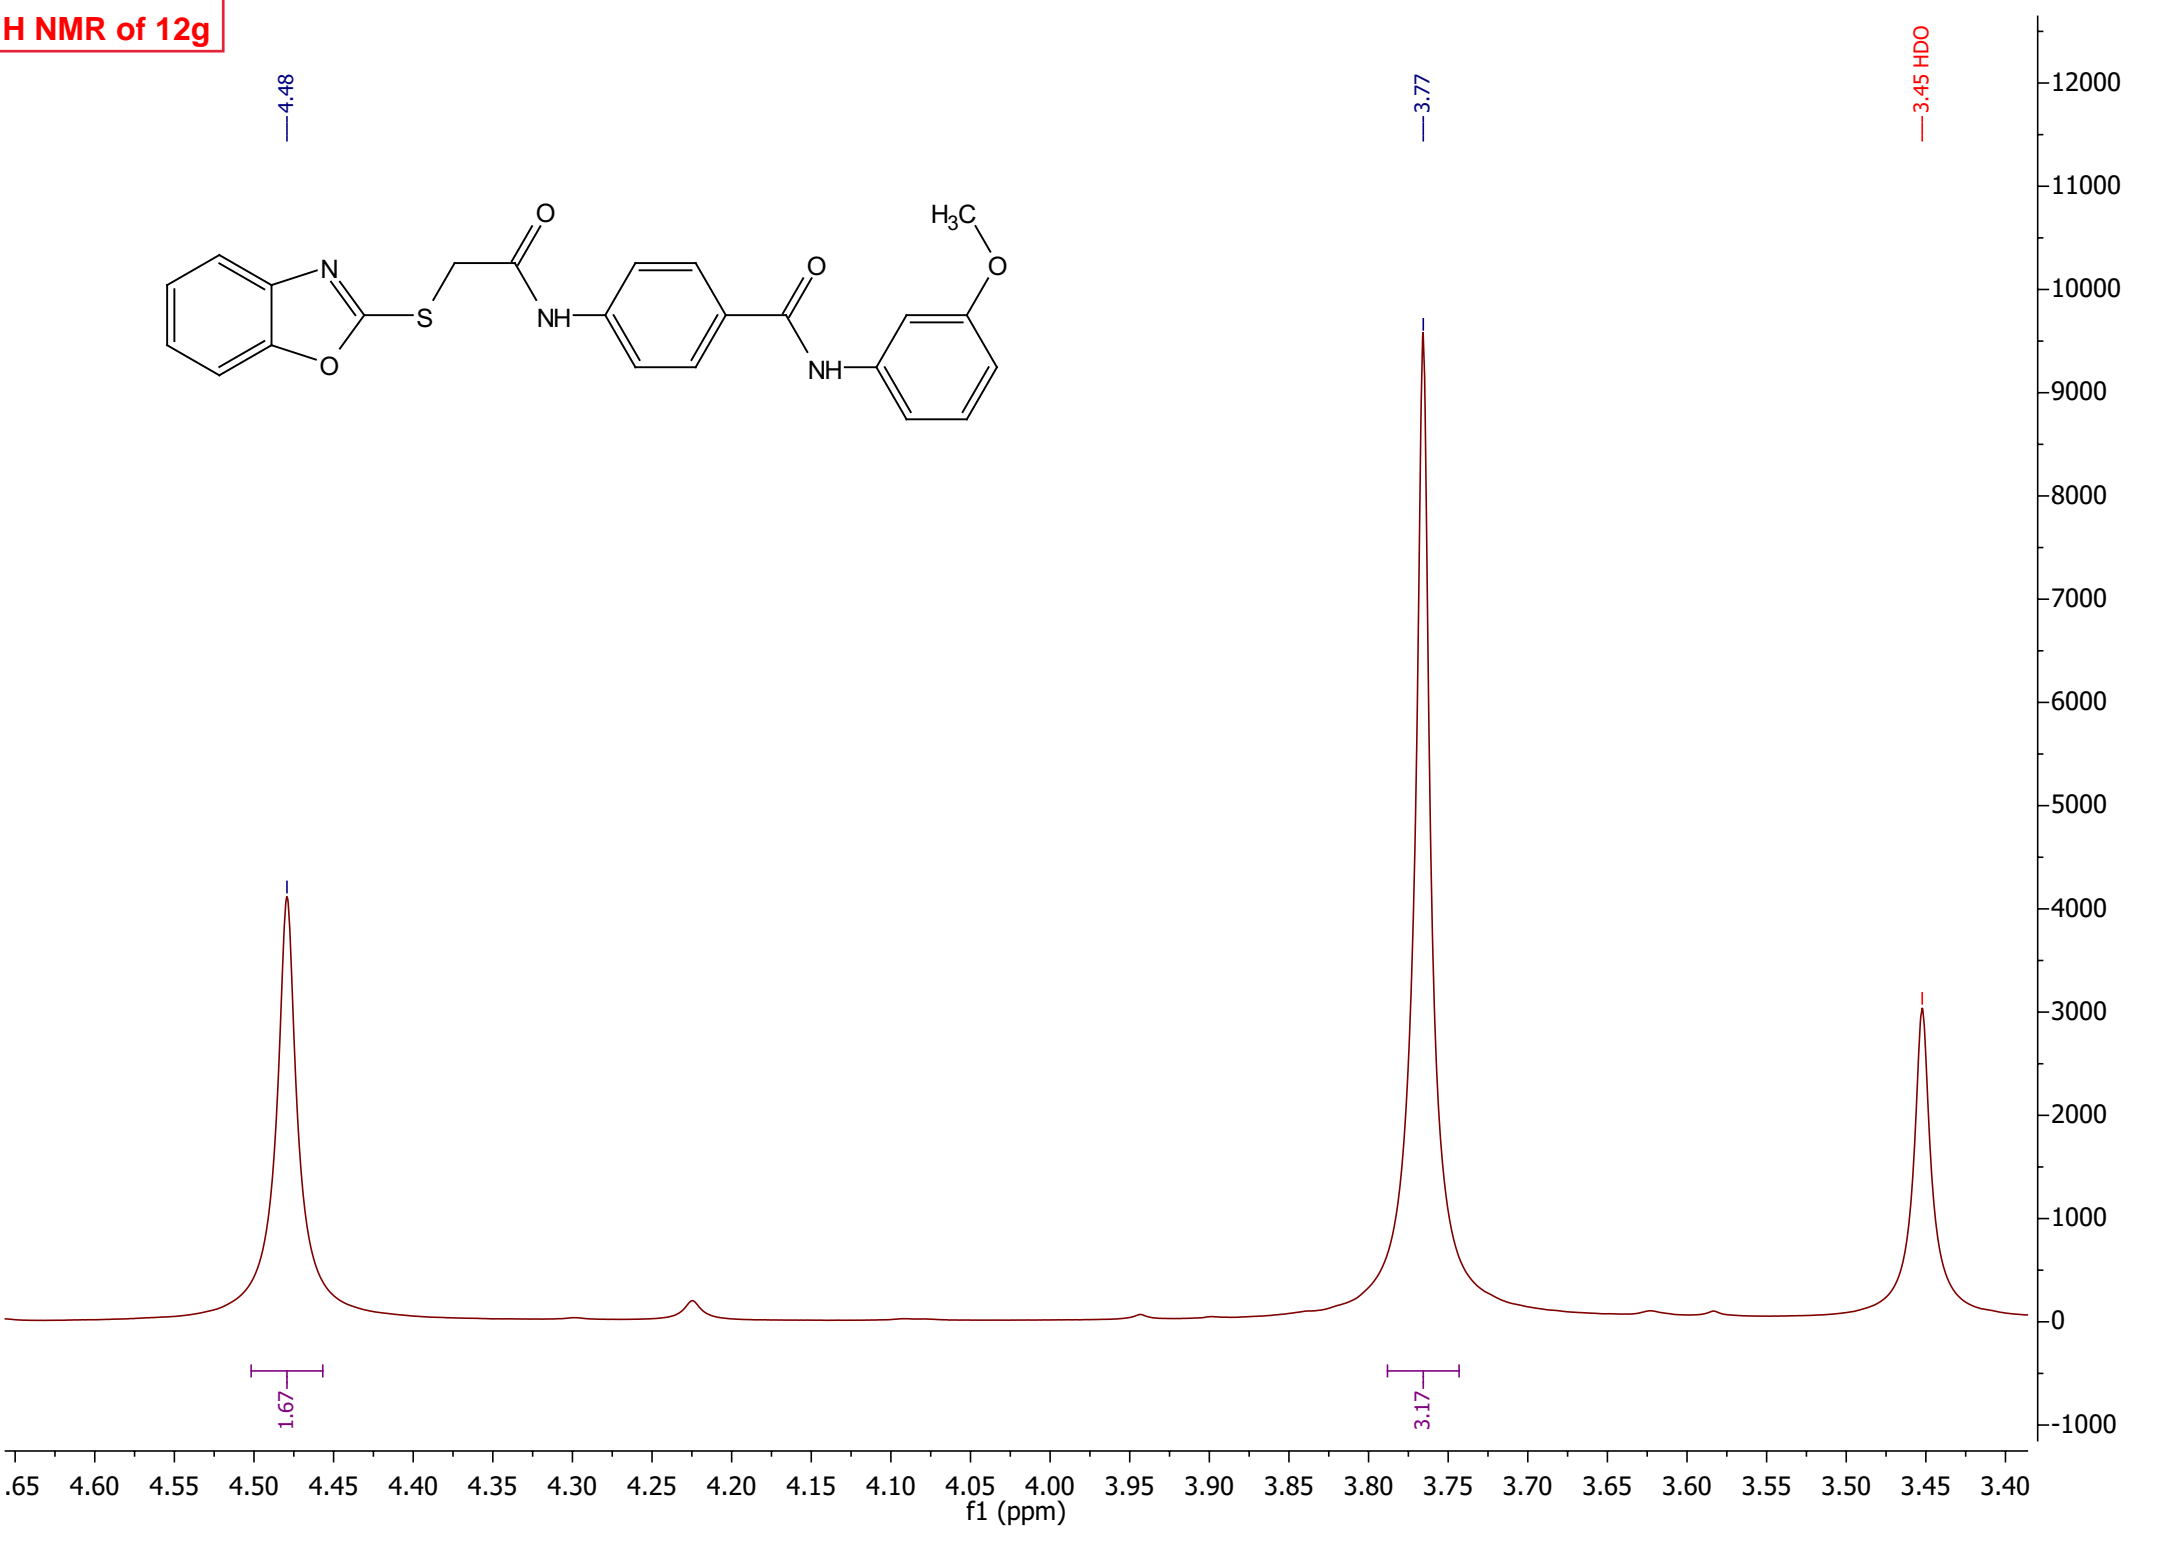



**<sup>1</sup>H NMR of 12g**



8.01  
7.99

7.80  
7.77

7.68  
7.67  
7.65  
7.64  
7.63

7.53  
7.52  
7.51  
7.51  
7.42  
7.40  
7.36  
7.35  
7.34

7.34  
7.34  
7.33  
7.32  
7.31  
7.28  
7.26  
7.24

6.70  
6.69  
6.68  
6.67

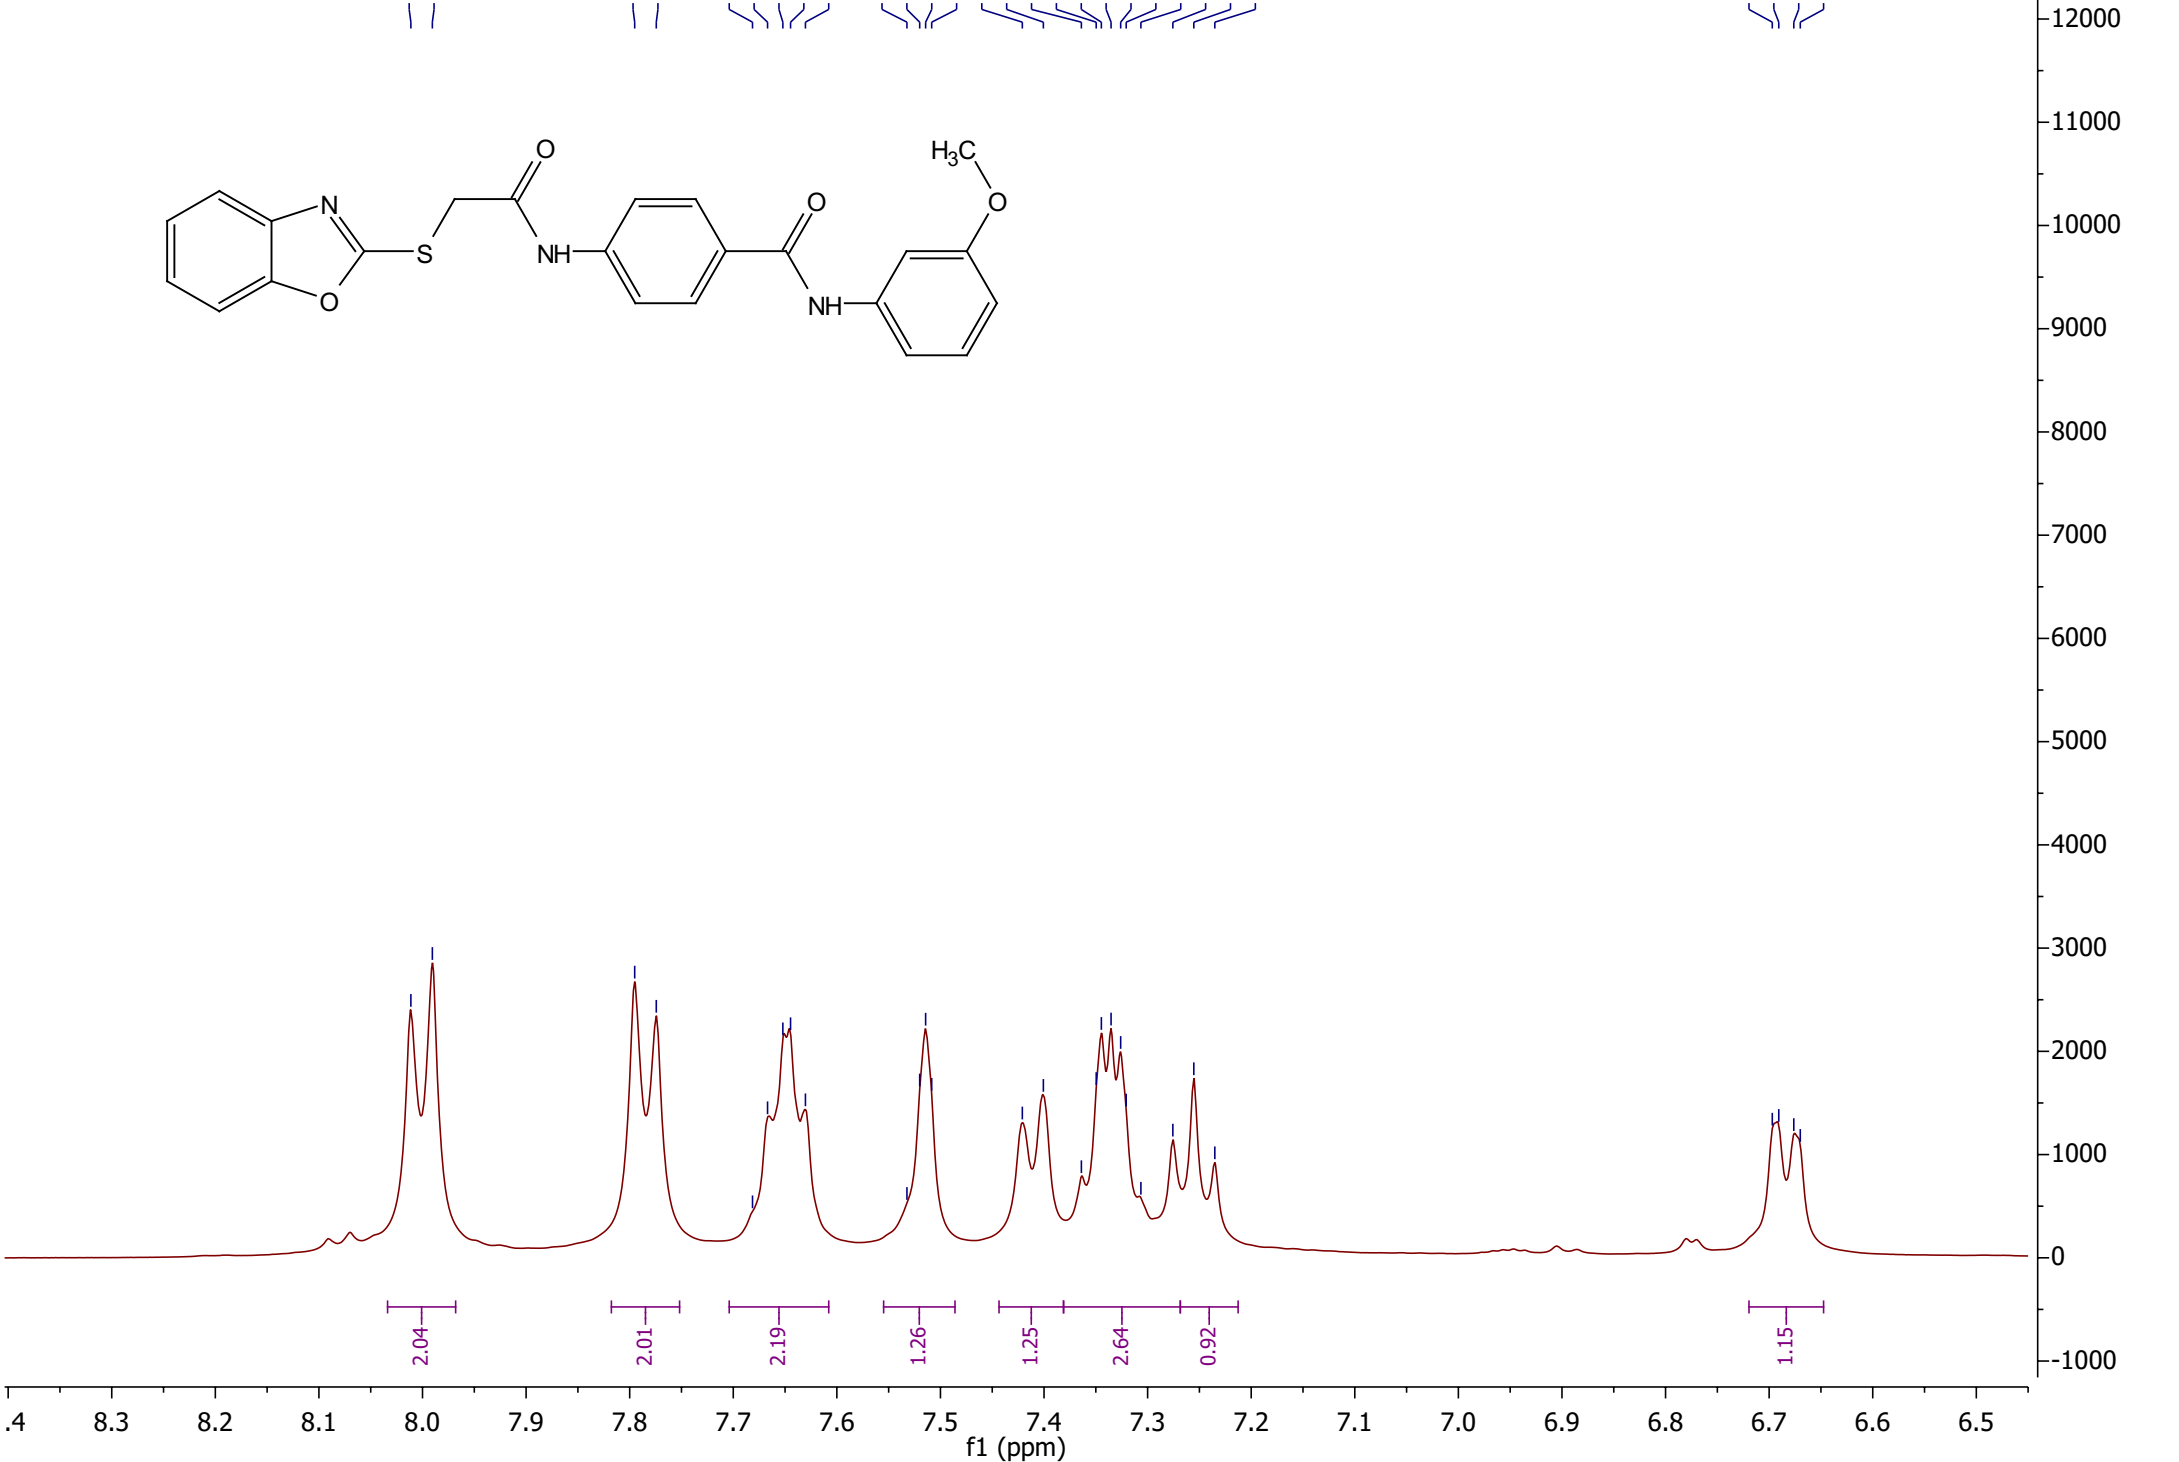

**<sup>1</sup>H NMR of 12g**

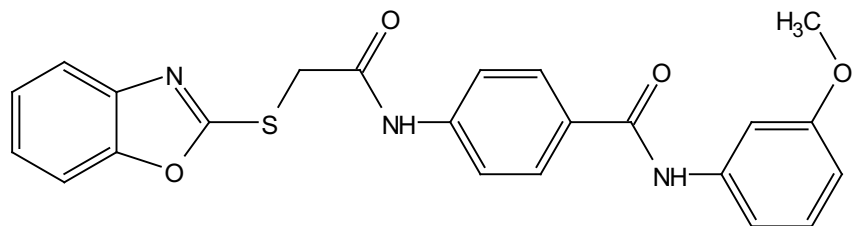

10.83

10.17

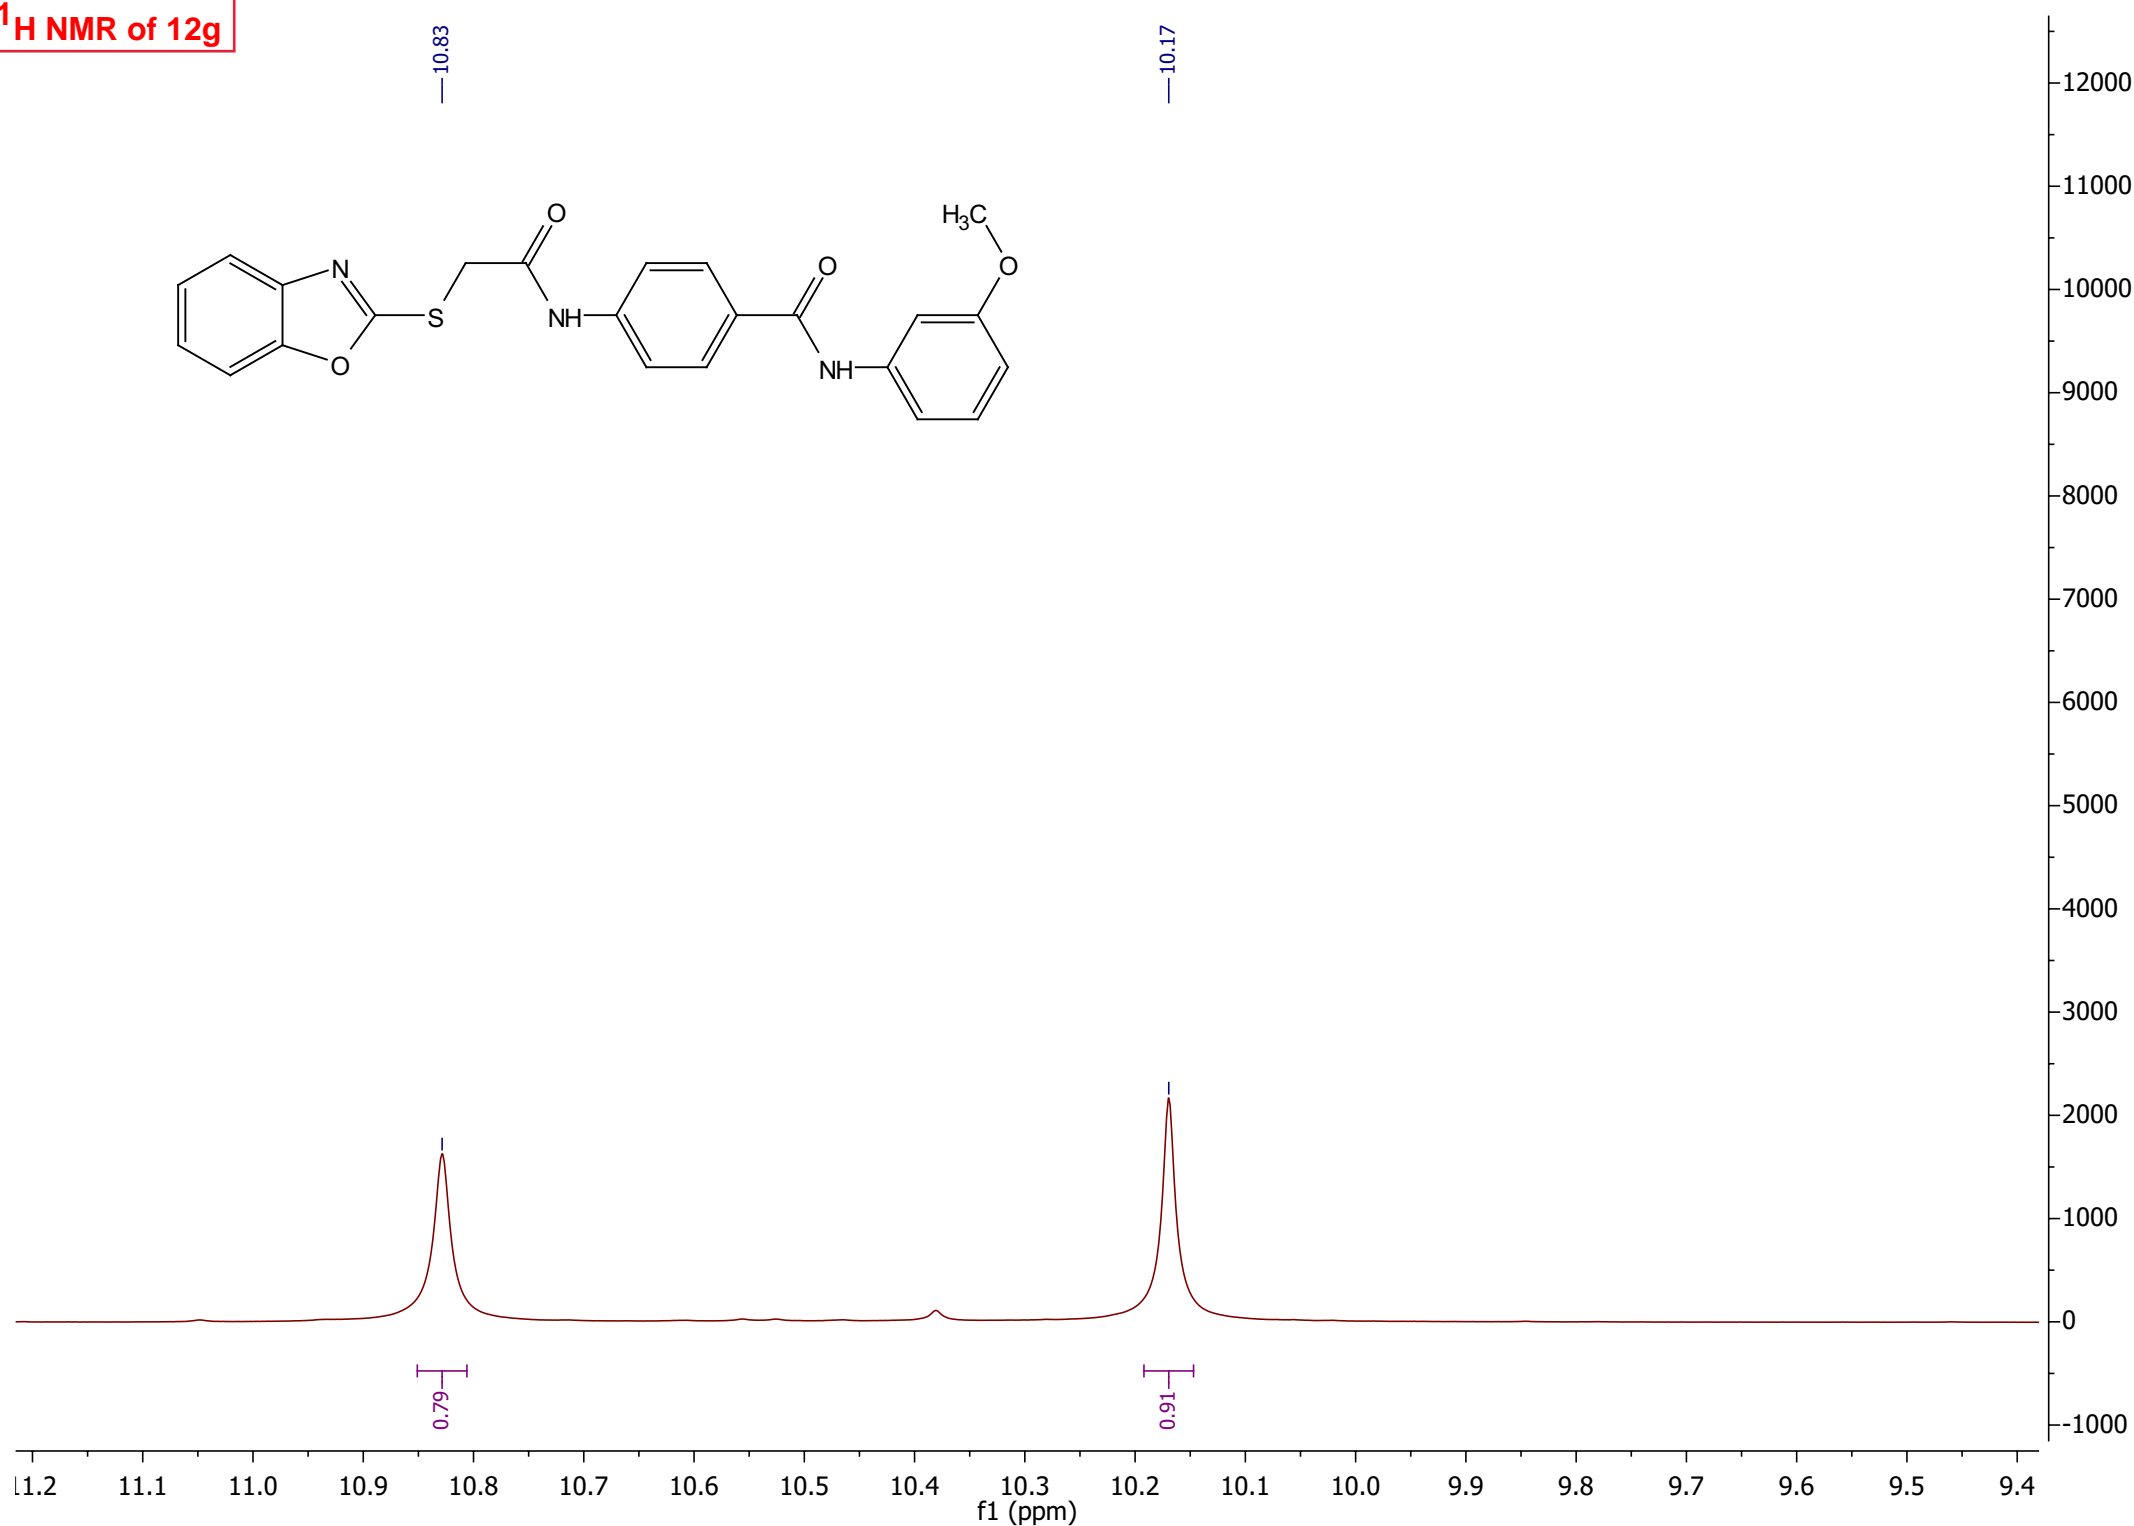

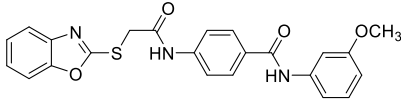

Mass spec. of 12g

RT: 0.00 - 3.75 SM: 7G

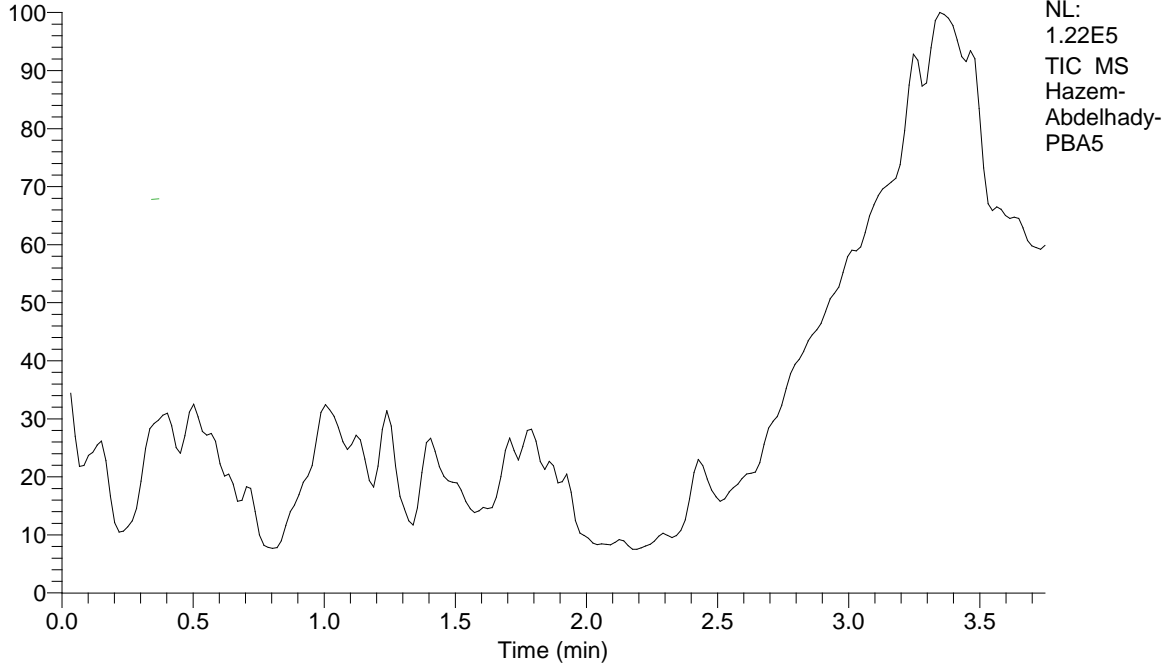

Hazem-Abdelhady-PBA5 #203 RT: 3.41 AV: 1 NL: 2.64E4  
T: + c EI Full ms [40.00-1000.00]

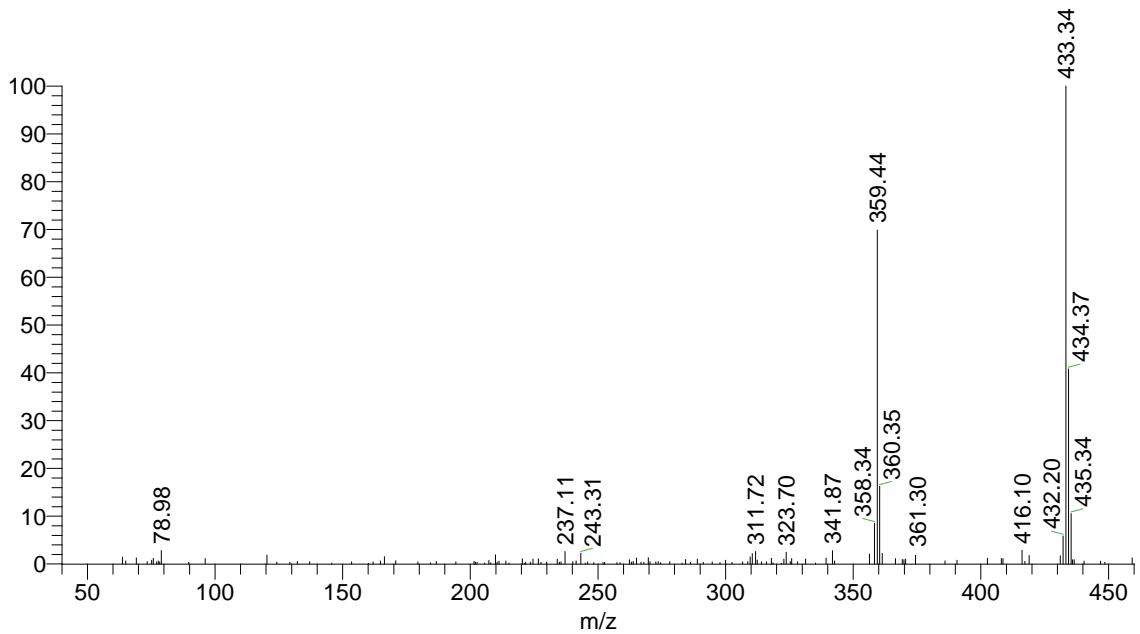



# <sup>1</sup>H NMR of 12h

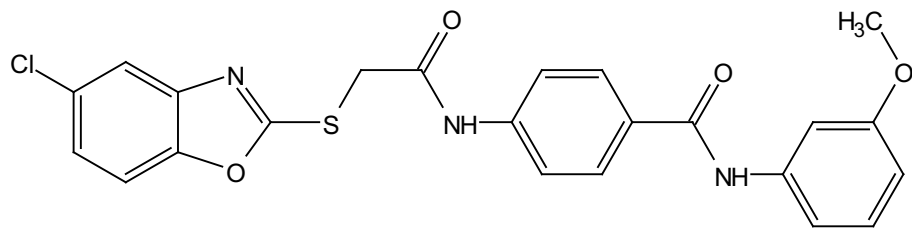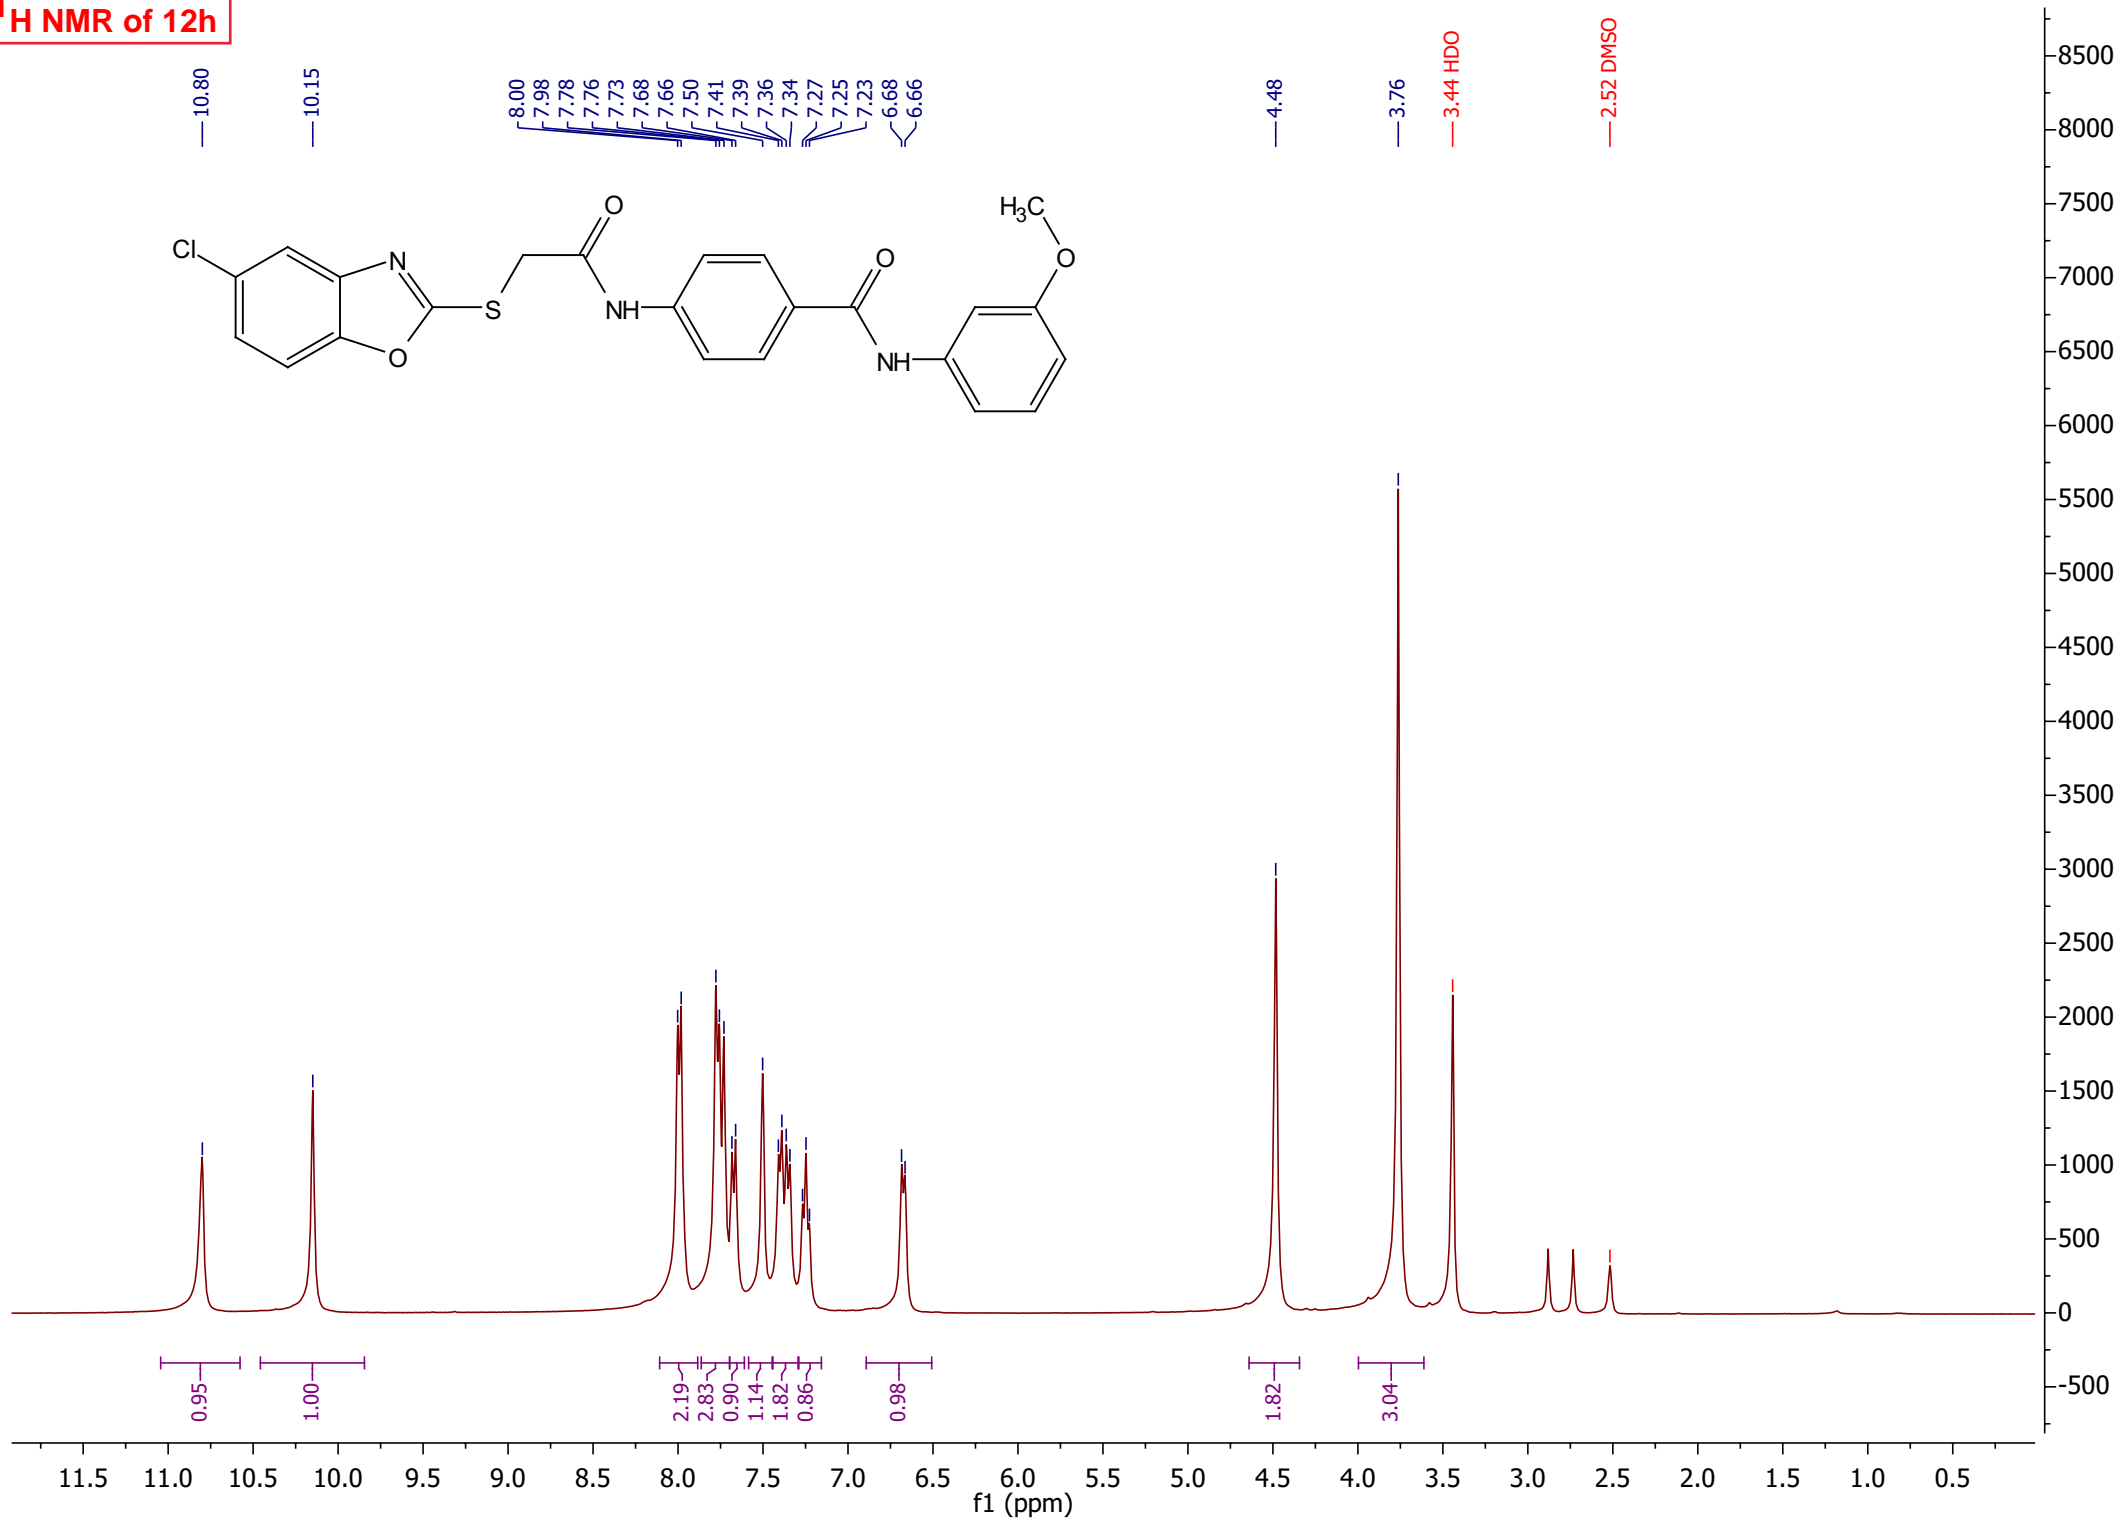

**<sup>1</sup>H NMR of 12h**

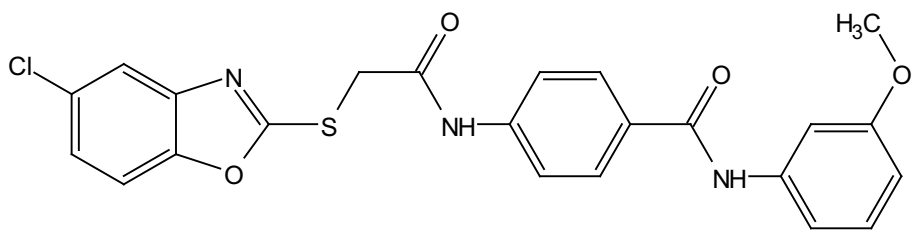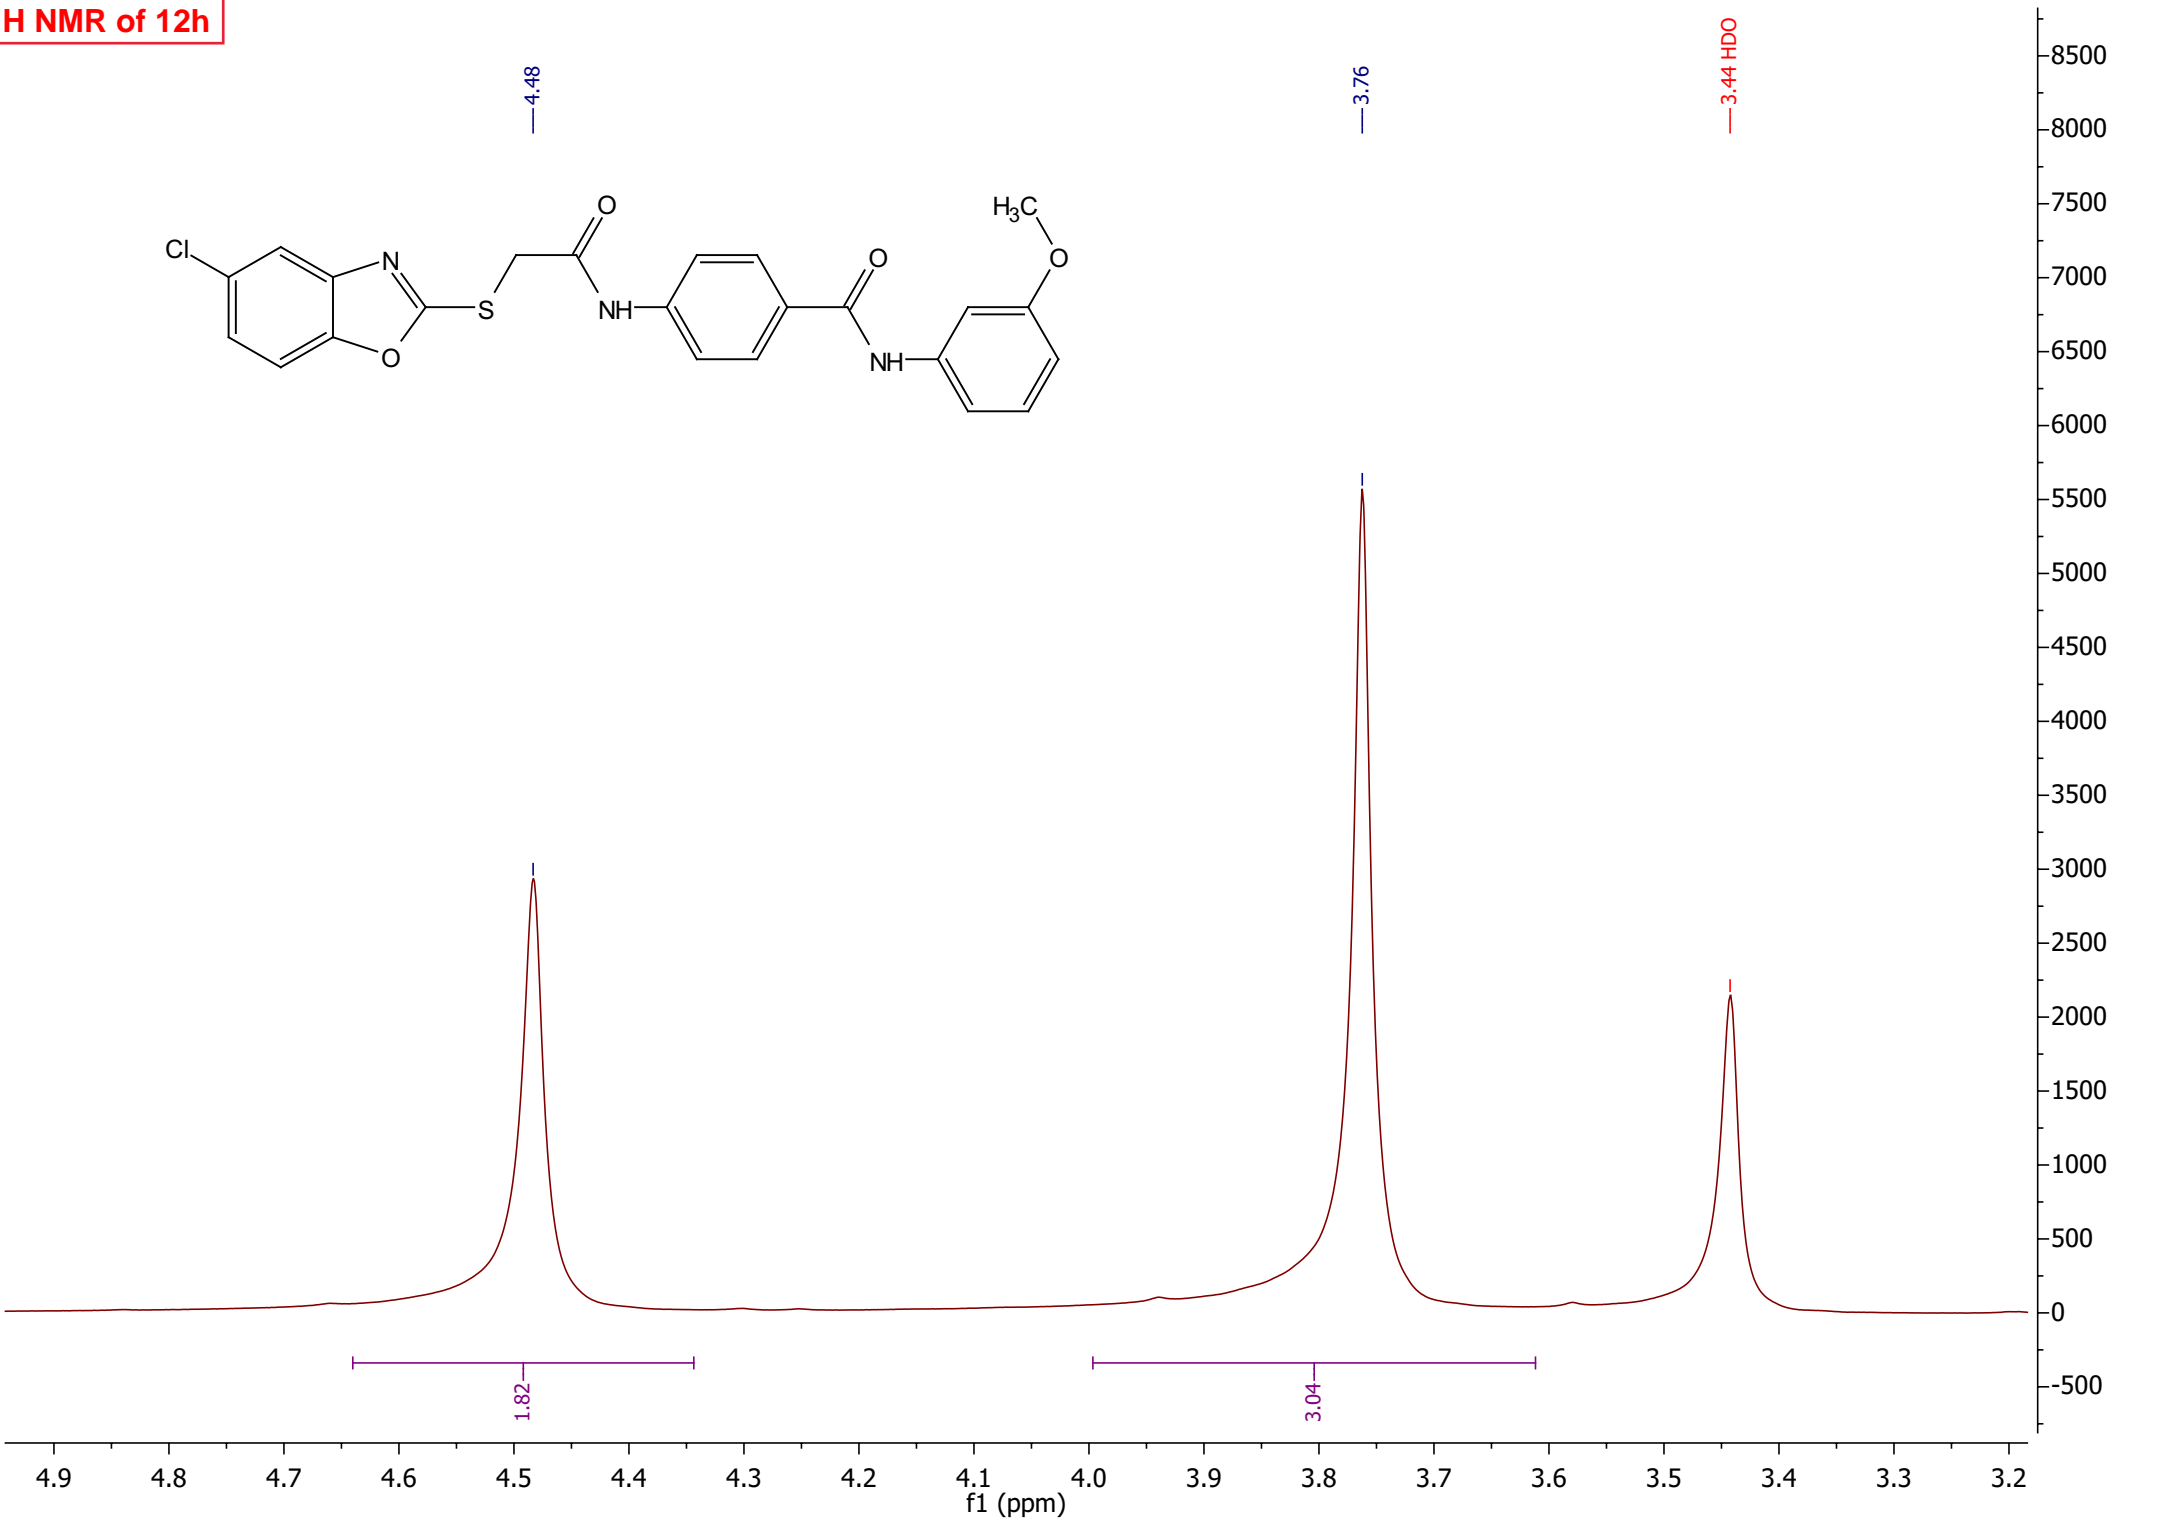

**<sup>1</sup>H NMR of 12h**



8.00  
7.98  
7.78  
7.76  
7.73  
7.68  
7.66  
7.50  
7.41  
7.39  
7.36  
7.34  
7.27  
7.25  
7.23  
6.68  
6.66

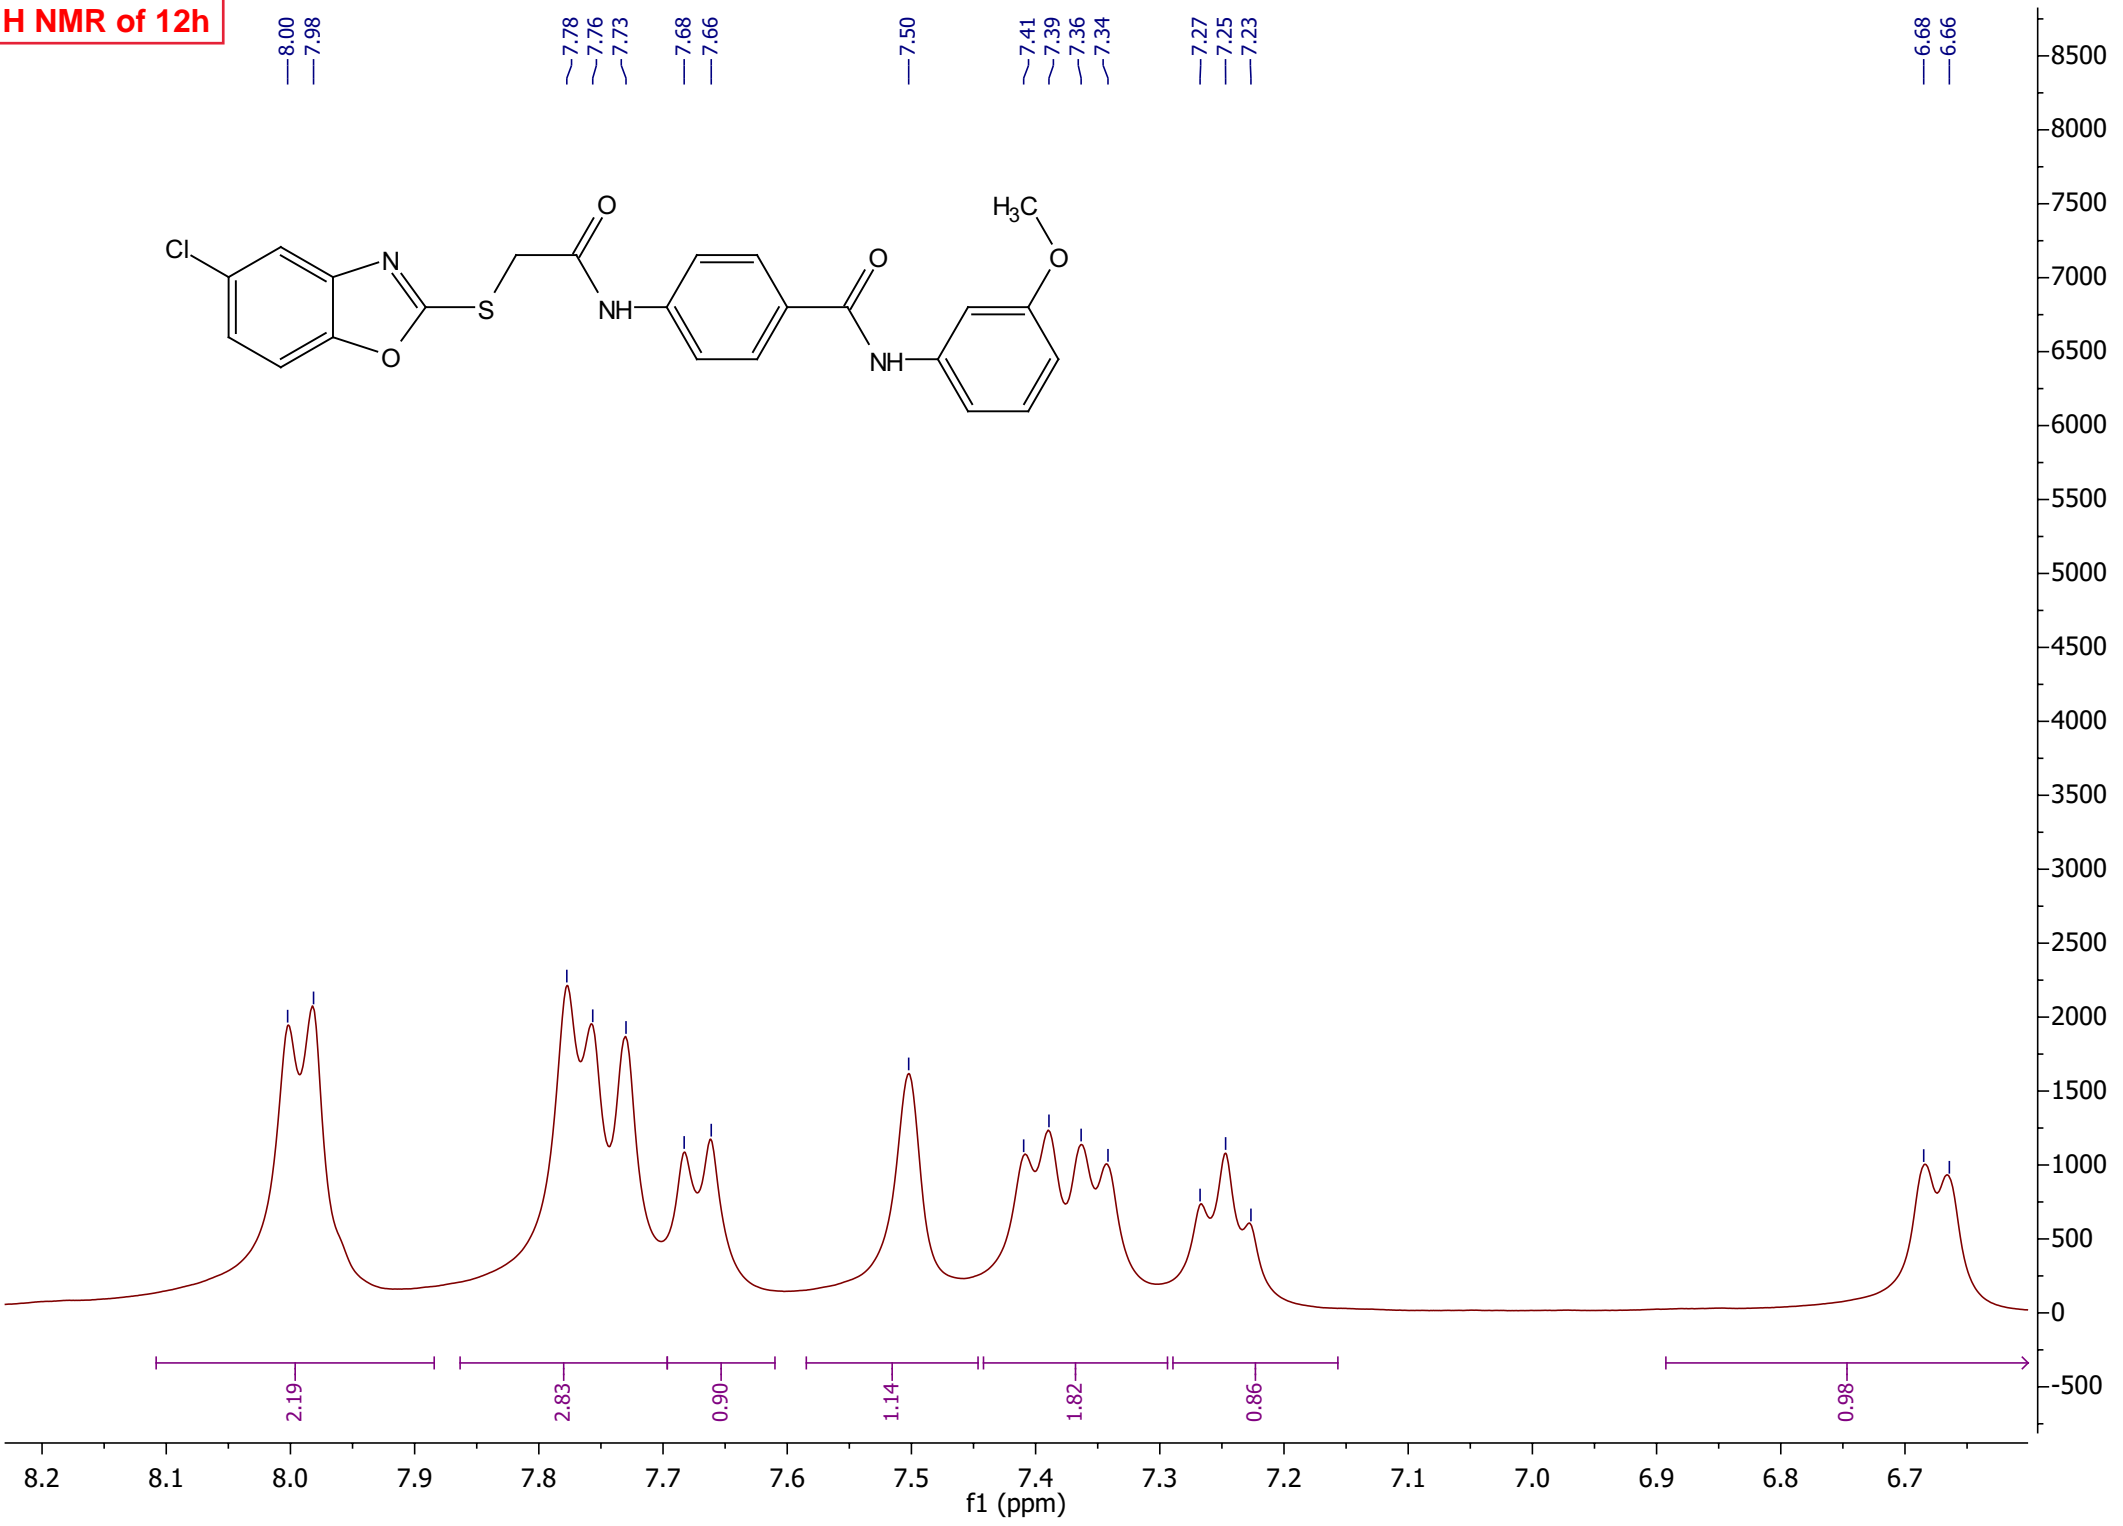

**<sup>1</sup>H NMR of 12h**

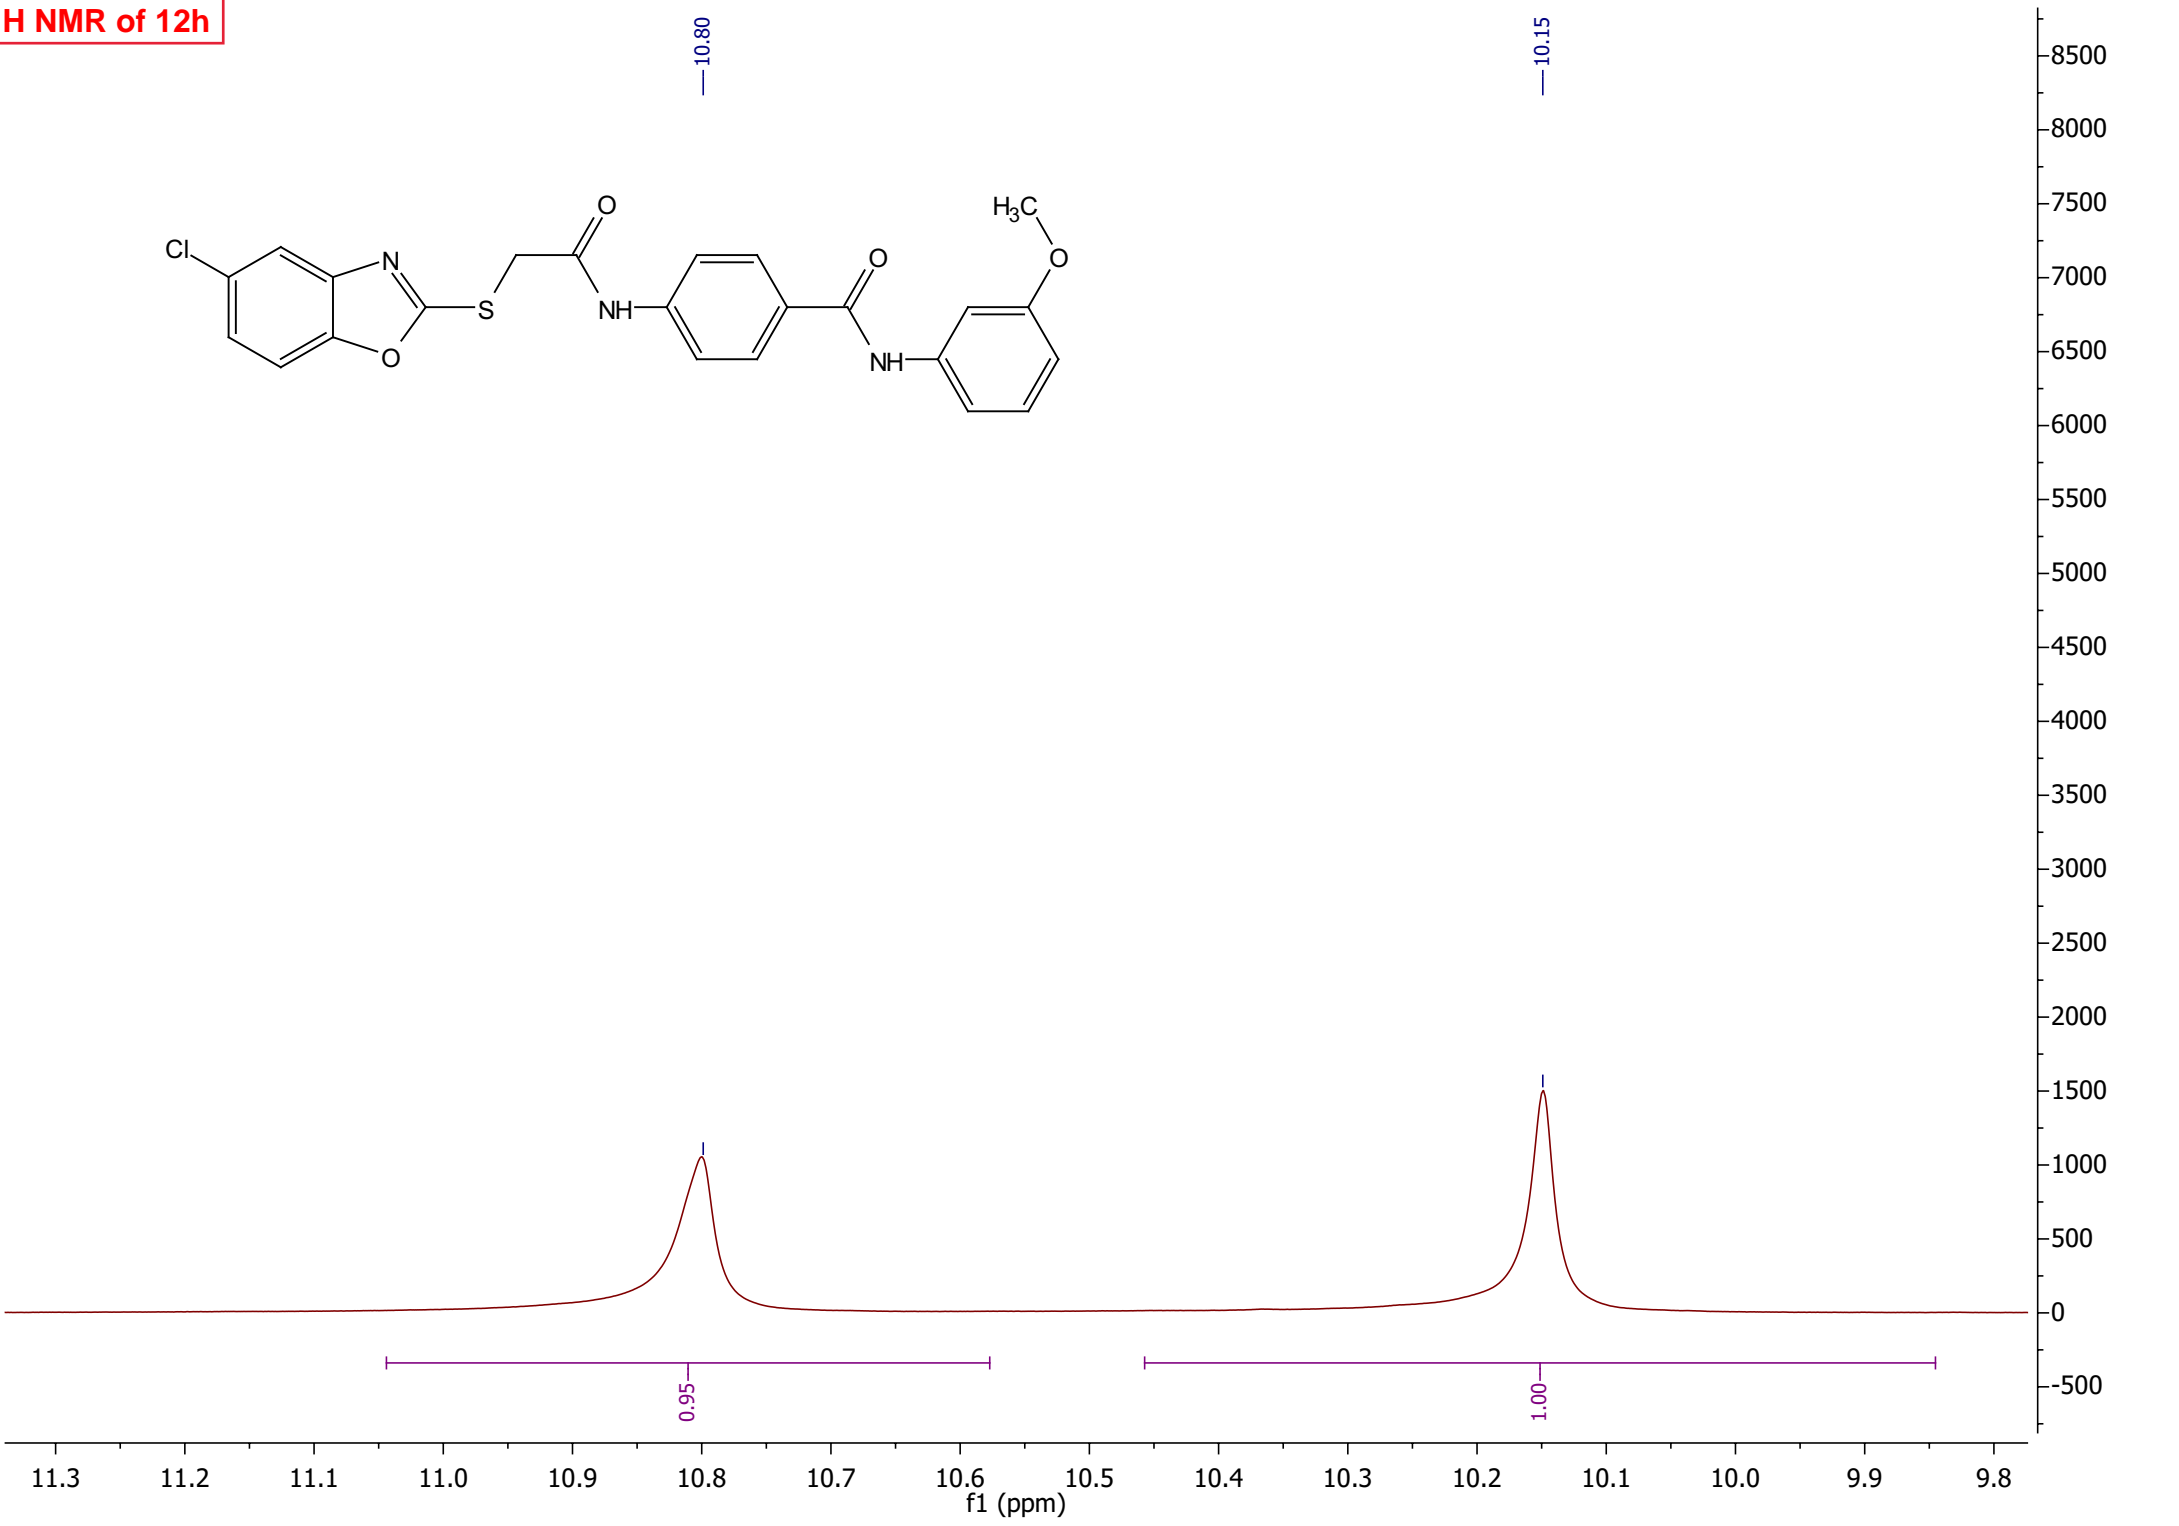



# IR Of Comp. 12i

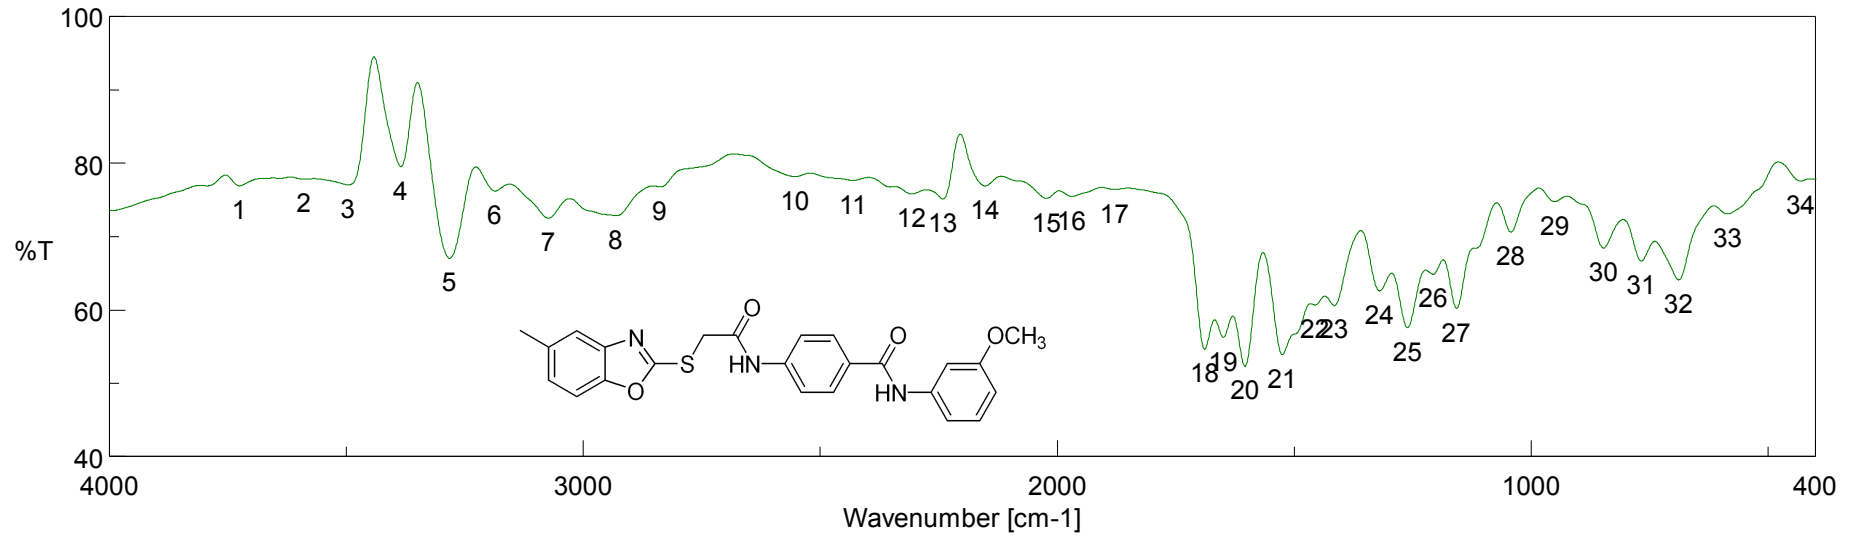

[ Result of Peak Picking ]

| No. | Position | Intensity | No. | Position | Intensity | No. | Position | Intensity | No. | Position | Intensity |
|-----|----------|-----------|-----|----------|-----------|-----|----------|-----------|-----|----------|-----------|
| 1   | 3725.8   | 76.886    | 2   | 3589.84  | 77.7685   | 3   | 3496.31  | 77.0158   | 4   | 3385.42  | 79.507    |
| 5   | 3282.25  | 66.9992   | 6   | 3186.79  | 76.1775   | 7   | 3073.98  | 72.4882   | 8   | 2931.27  | 72.8111   |
| 9   | 2837.74  | 76.7254   | 10  | 2553.29  | 78.1583   | 11  | 2430.83  | 77.6224   | 12  | 2307.41  | 75.7794   |
| 13  | 2240.88  | 75.0879   | 14  | 2152.17  | 76.8674   | 15  | 2022.96  | 75.1694   | 16  | 1968.96  | 75.438    |
| 17  | 1879.29  | 76.3926   | 18  | 1688.37  | 54.6311   | 19  | 1648.84  | 56.2265   | 20  | 1603.52  | 52.2829   |
| 21  | 1525.42  | 53.8957   | 22  | 1455.99  | 60.6483   | 23  | 1415.49  | 60.5682   | 24  | 1320.04  | 62.5676   |
| 25  | 1260.25  | 57.5393   | 26  | 1206.26  | 64.8379   | 27  | 1157.08  | 60.1462   | 28  | 1042.34  | 70.5748   |
| 29  | 949.77   | 74.7438   | 30  | 846.597  | 68.4009   | 31  | 766.566  | 66.6274   | 32  | 688.463  | 64.0647   |
| 33  | 585.29   | 73.0553   | 34  | 431.012  | 77.5389   |     |          |           |     |          |           |

**<sup>1</sup>H NMR of 12i**

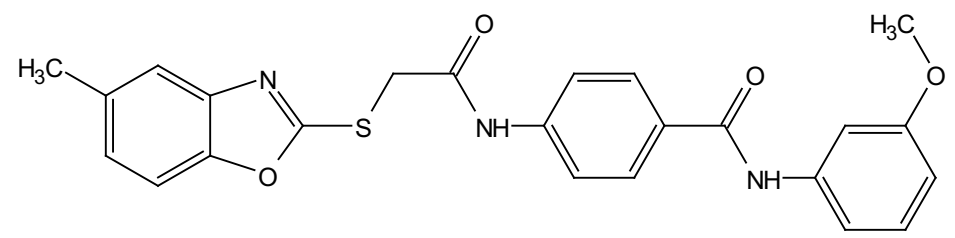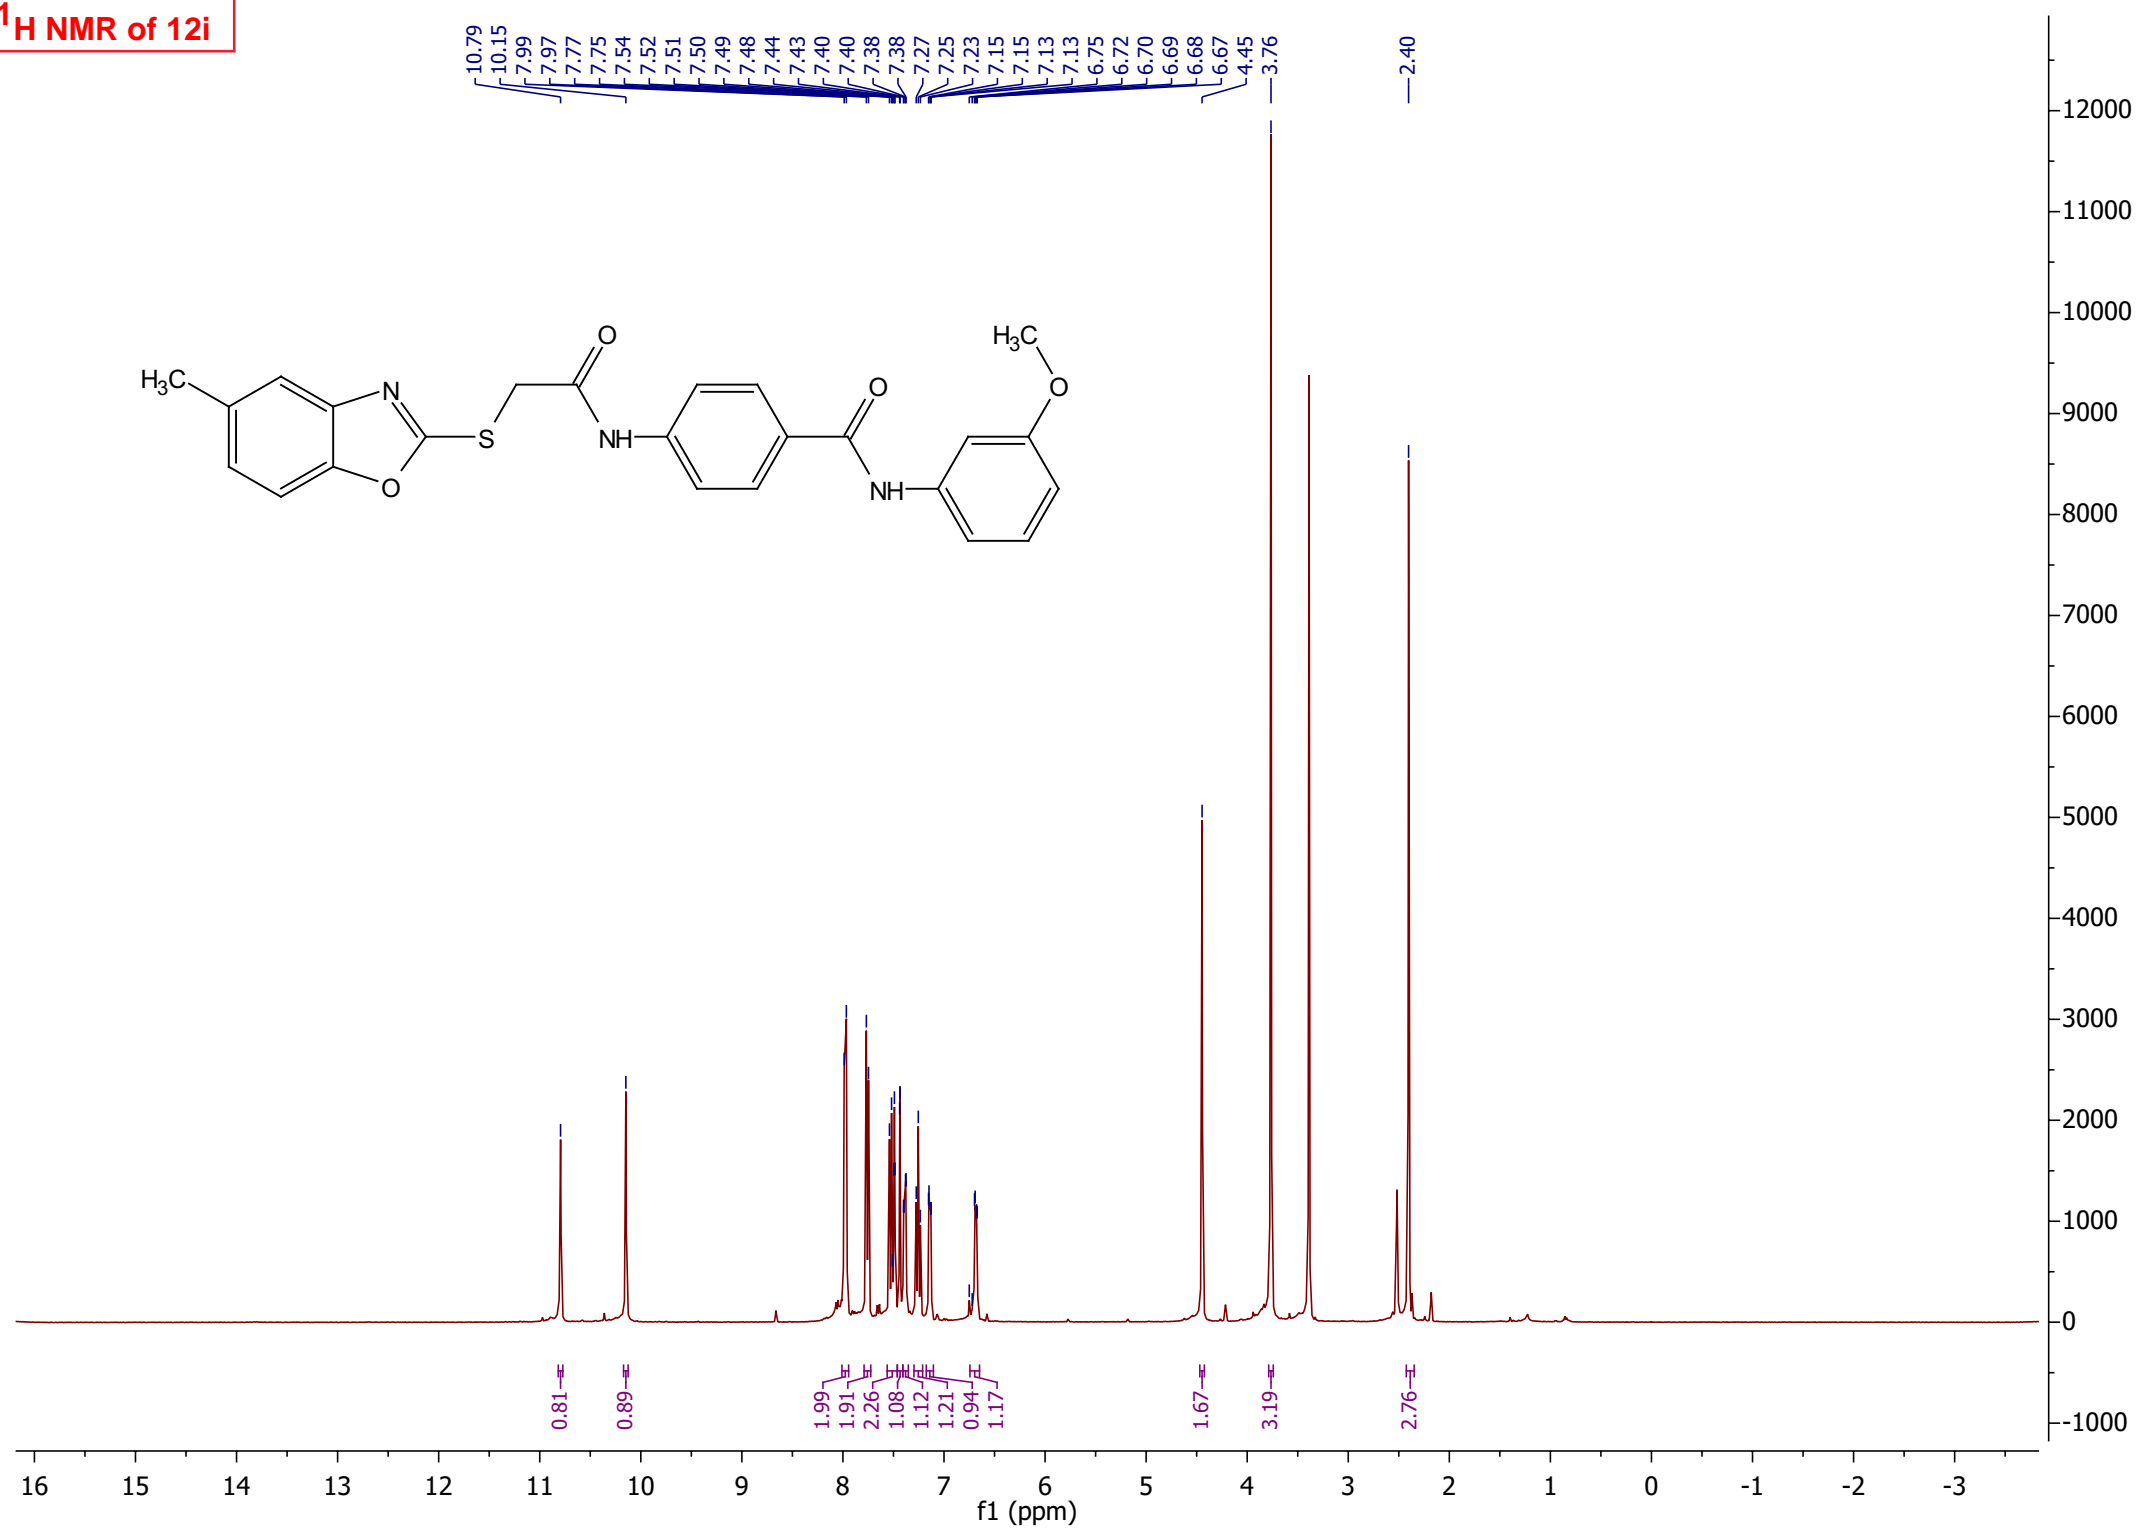

**<sup>1</sup>H NMR of 12i**

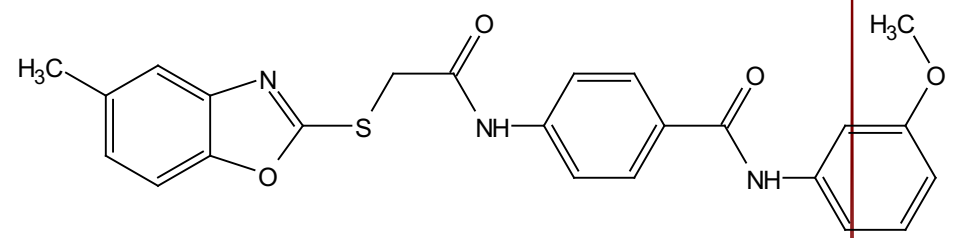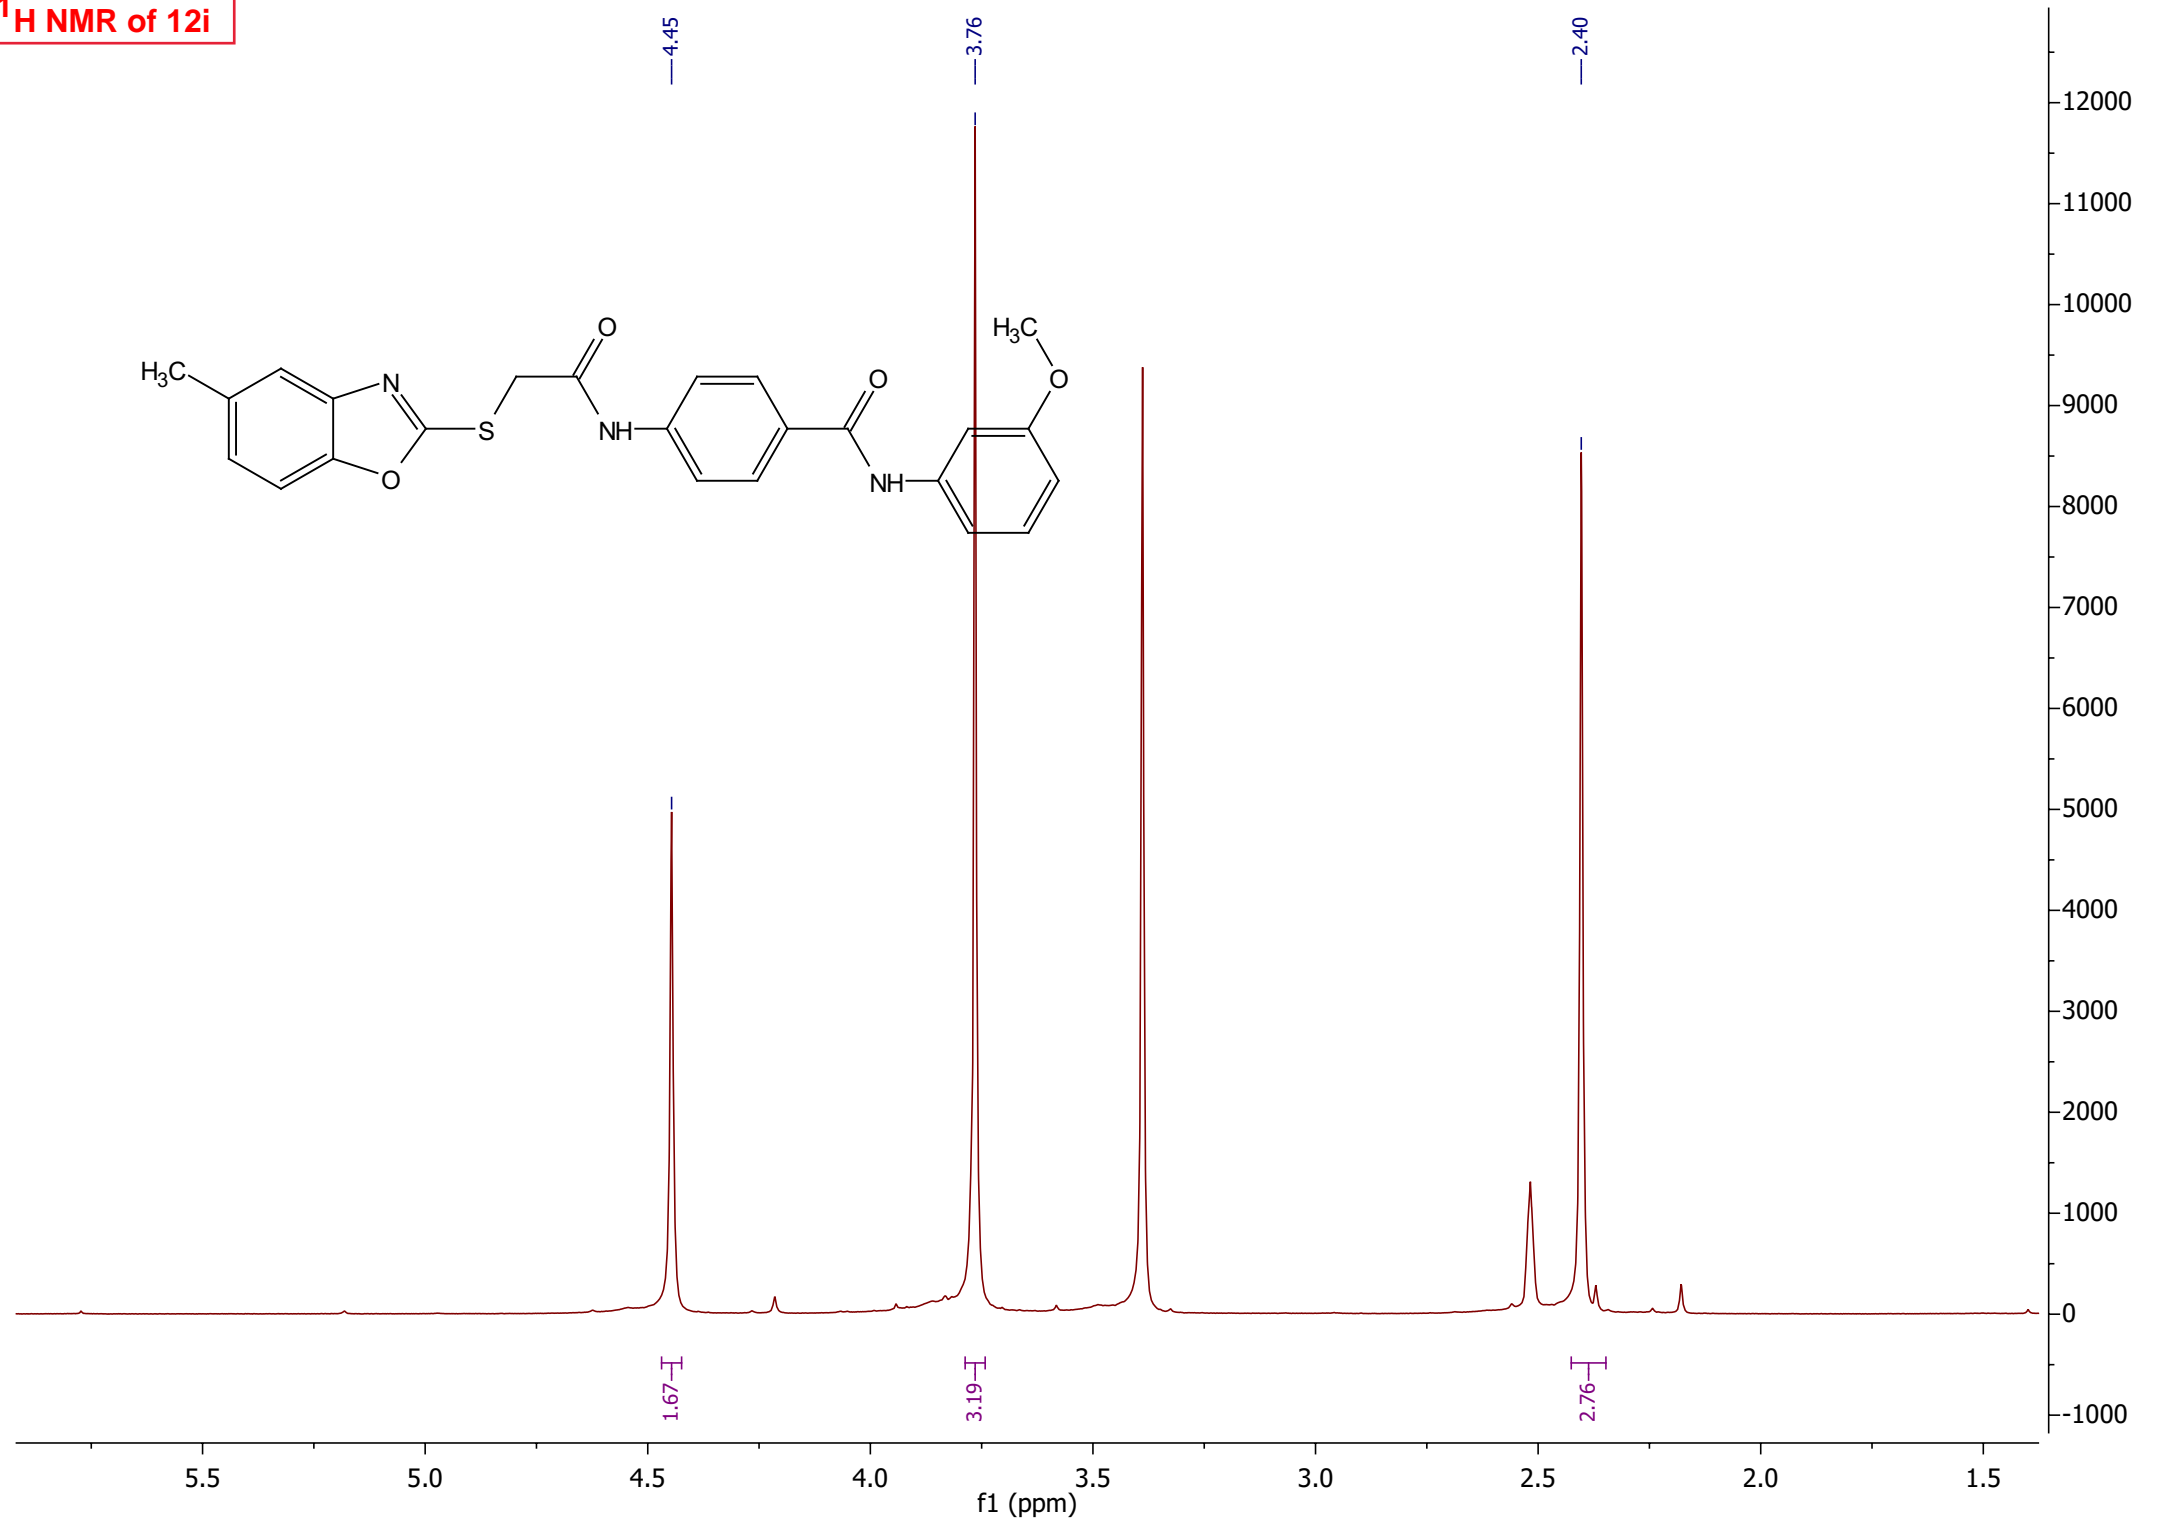

**<sup>1</sup>H NMR of 12i**

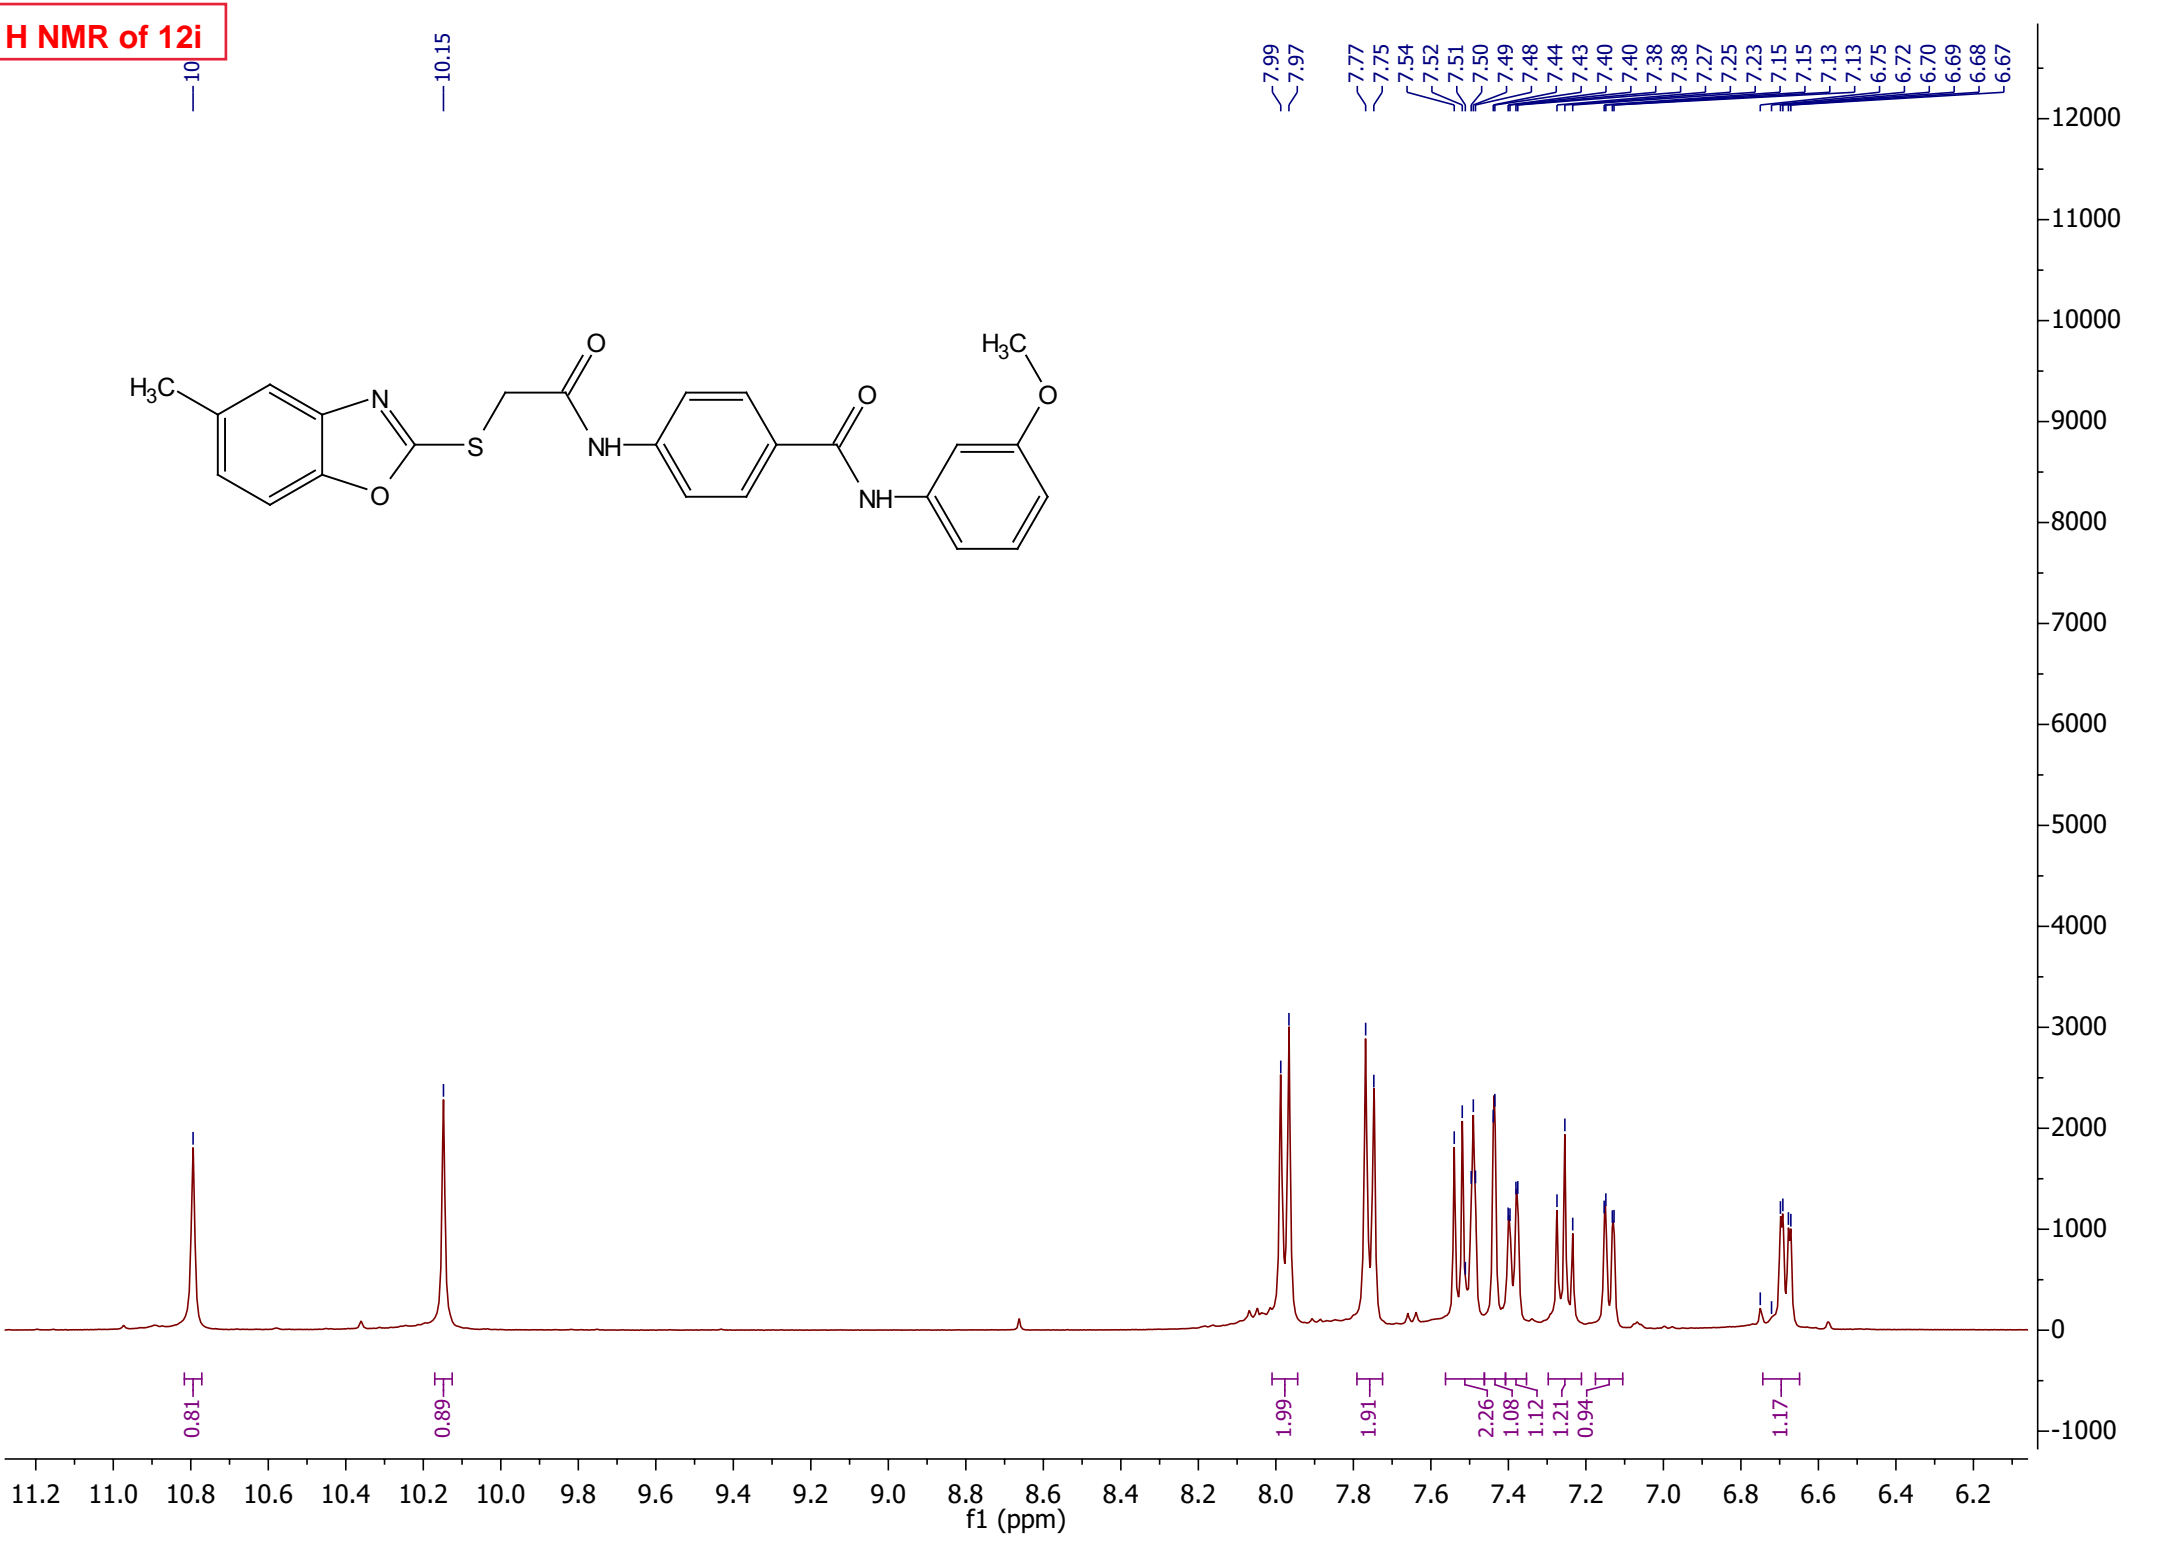

# <sup>13</sup>C NMR of 12i

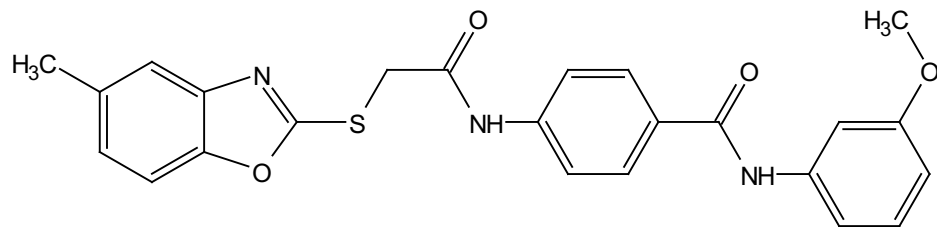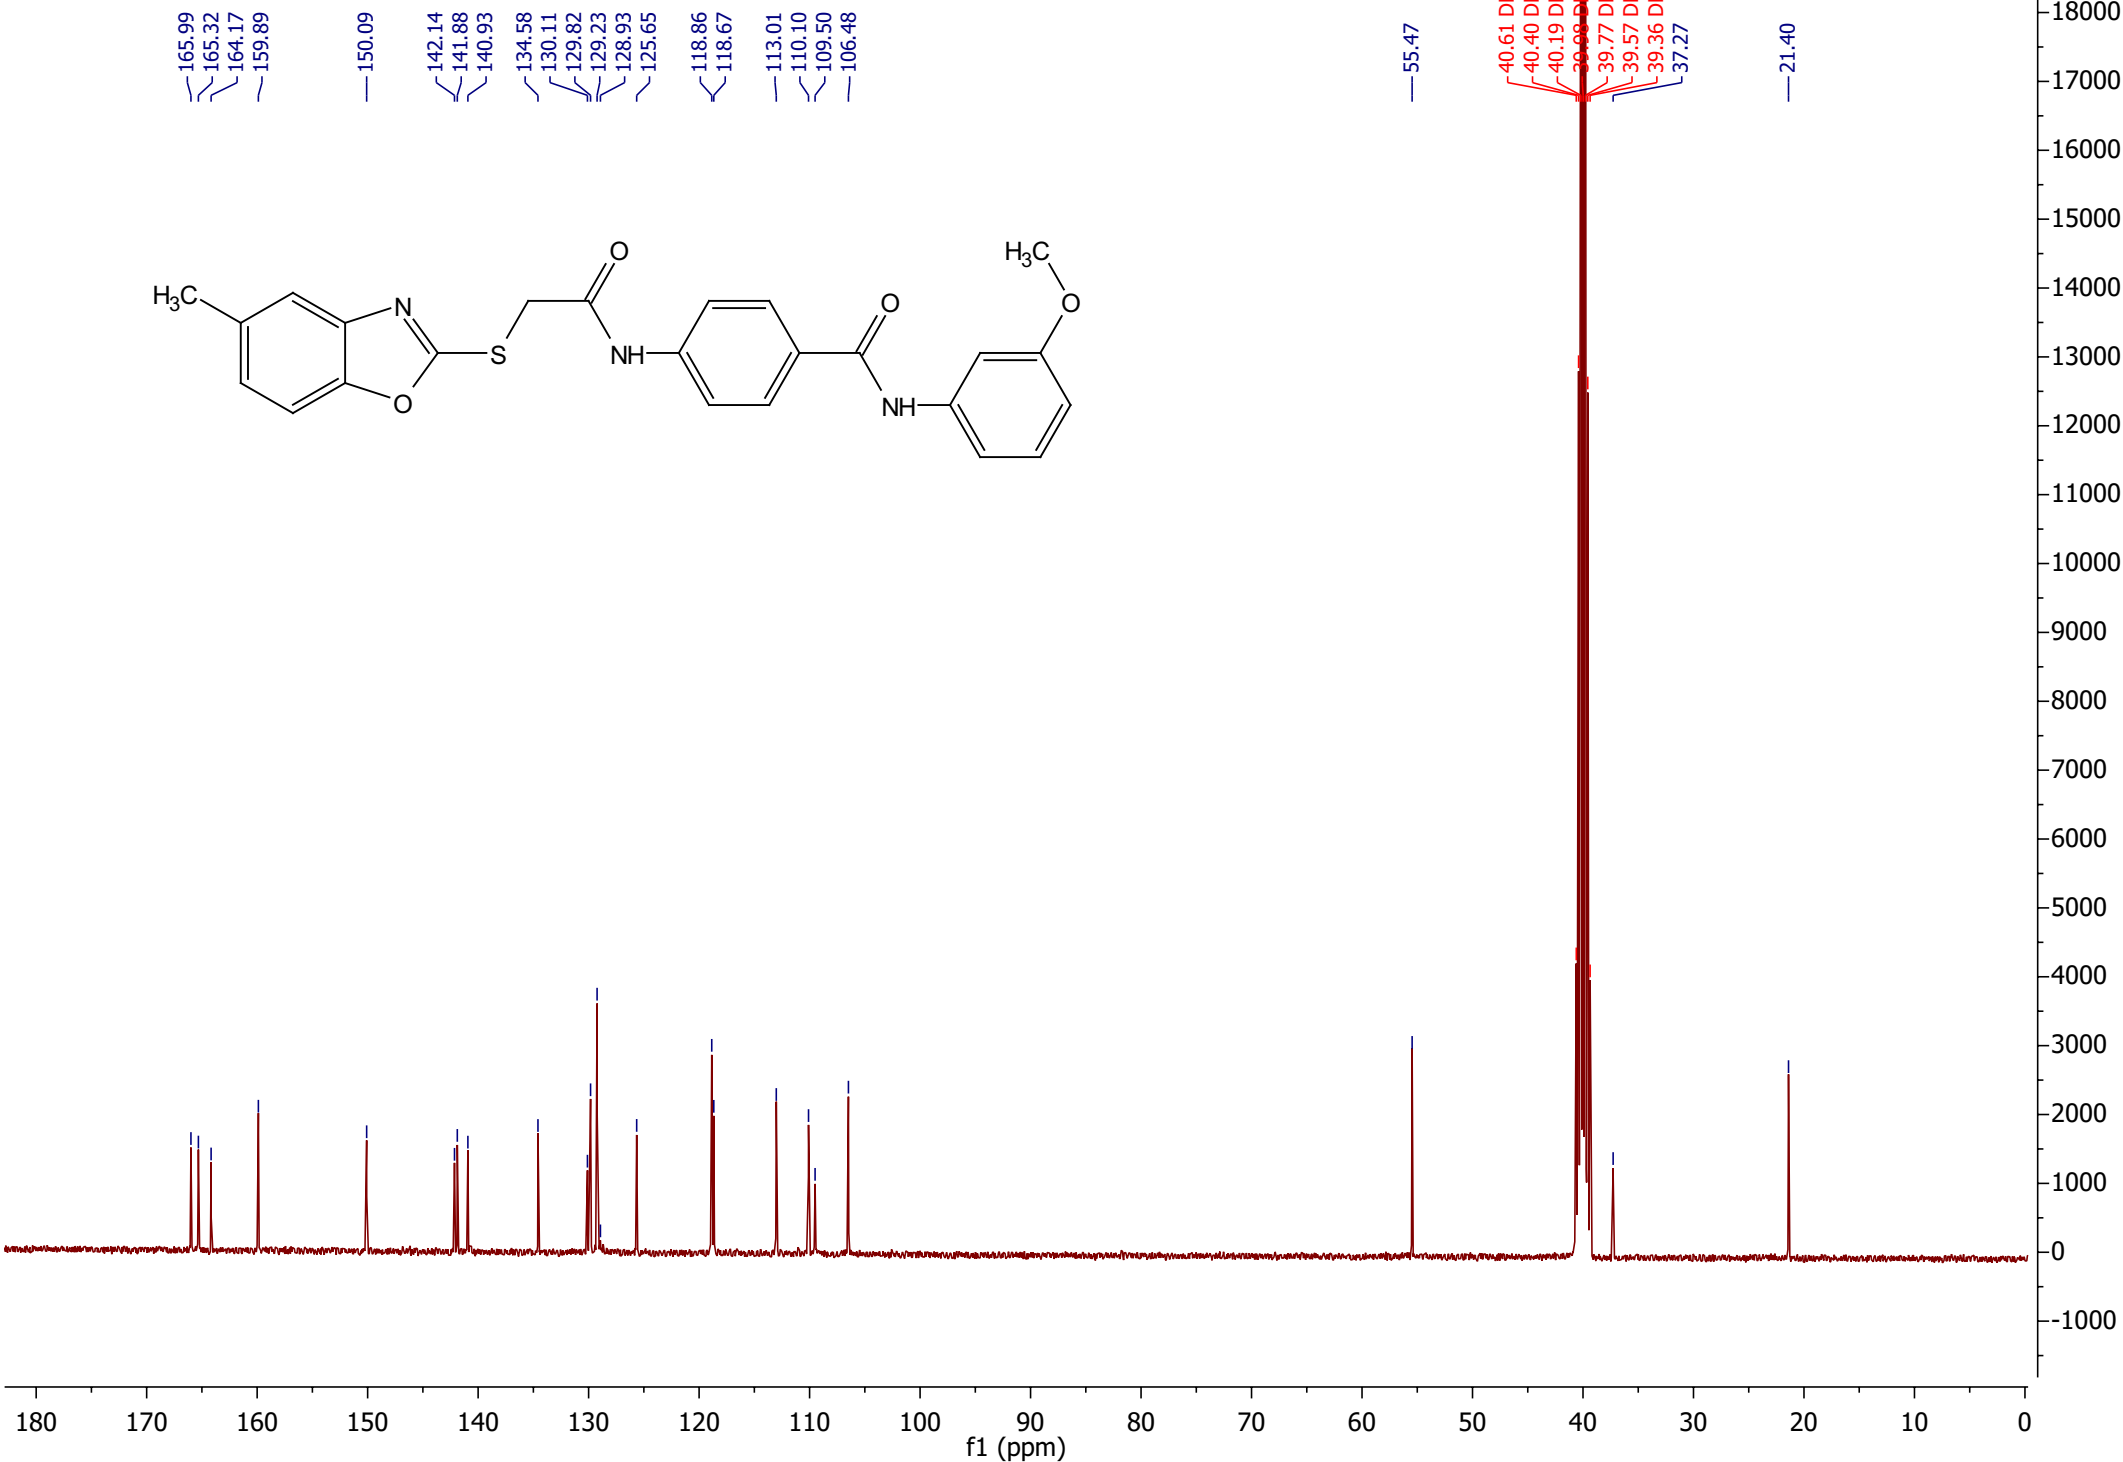

**<sup>13</sup>C NMR of 12i**

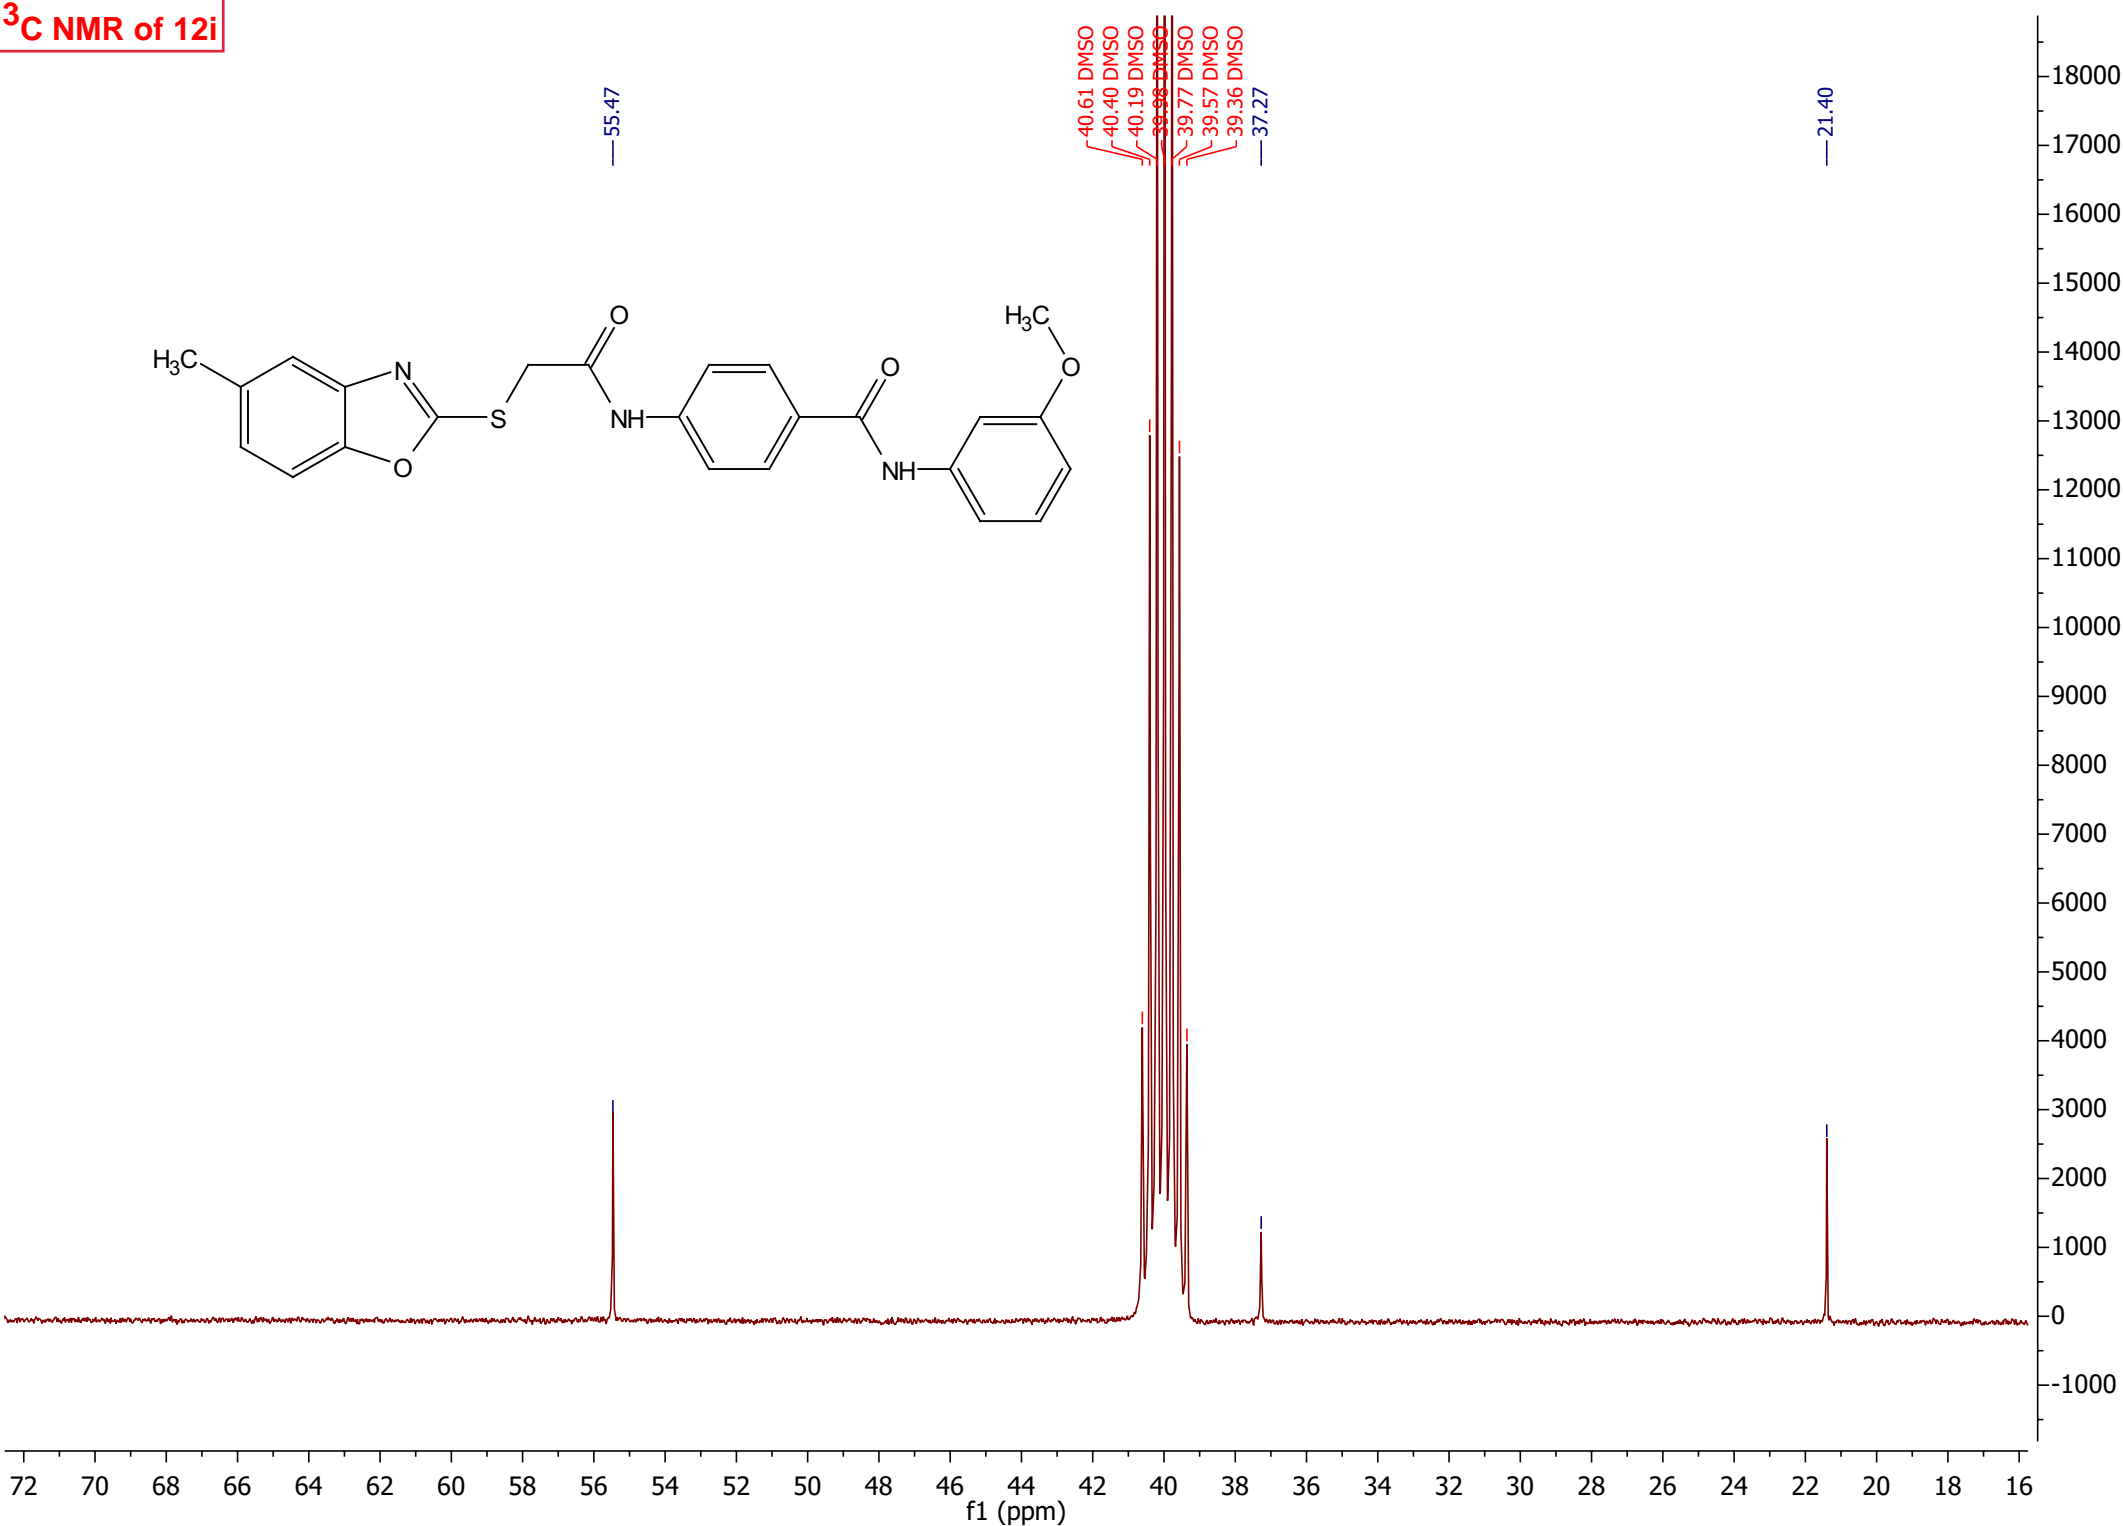

55.47

40.61 DMSO  
40.40 DMSO  
40.19 DMSO  
39.96 DMSO  
39.77 DMSO  
39.57 DMSO  
39.36 DMSO  
37.27

21.40

72 70 68 66 64 62 60 58 56 54 52 50 48 46 44 42 40 38 36 34 32 30 28 26 24 22 20 18 16

f1 (ppm)

**<sup>13</sup>C NMR of 12i**

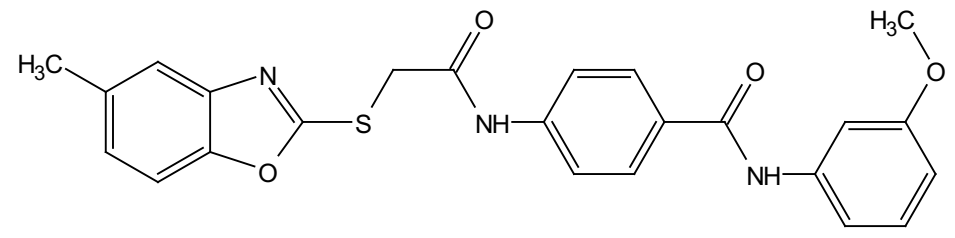

165.99  
165.32  
164.17  
159.89  
150.09  
142.14  
141.88  
140.93  
134.58  
130.11  
129.82  
129.23  
128.93  
125.65  
118.86  
118.67  
113.01  
110.10  
109.50  
106.48

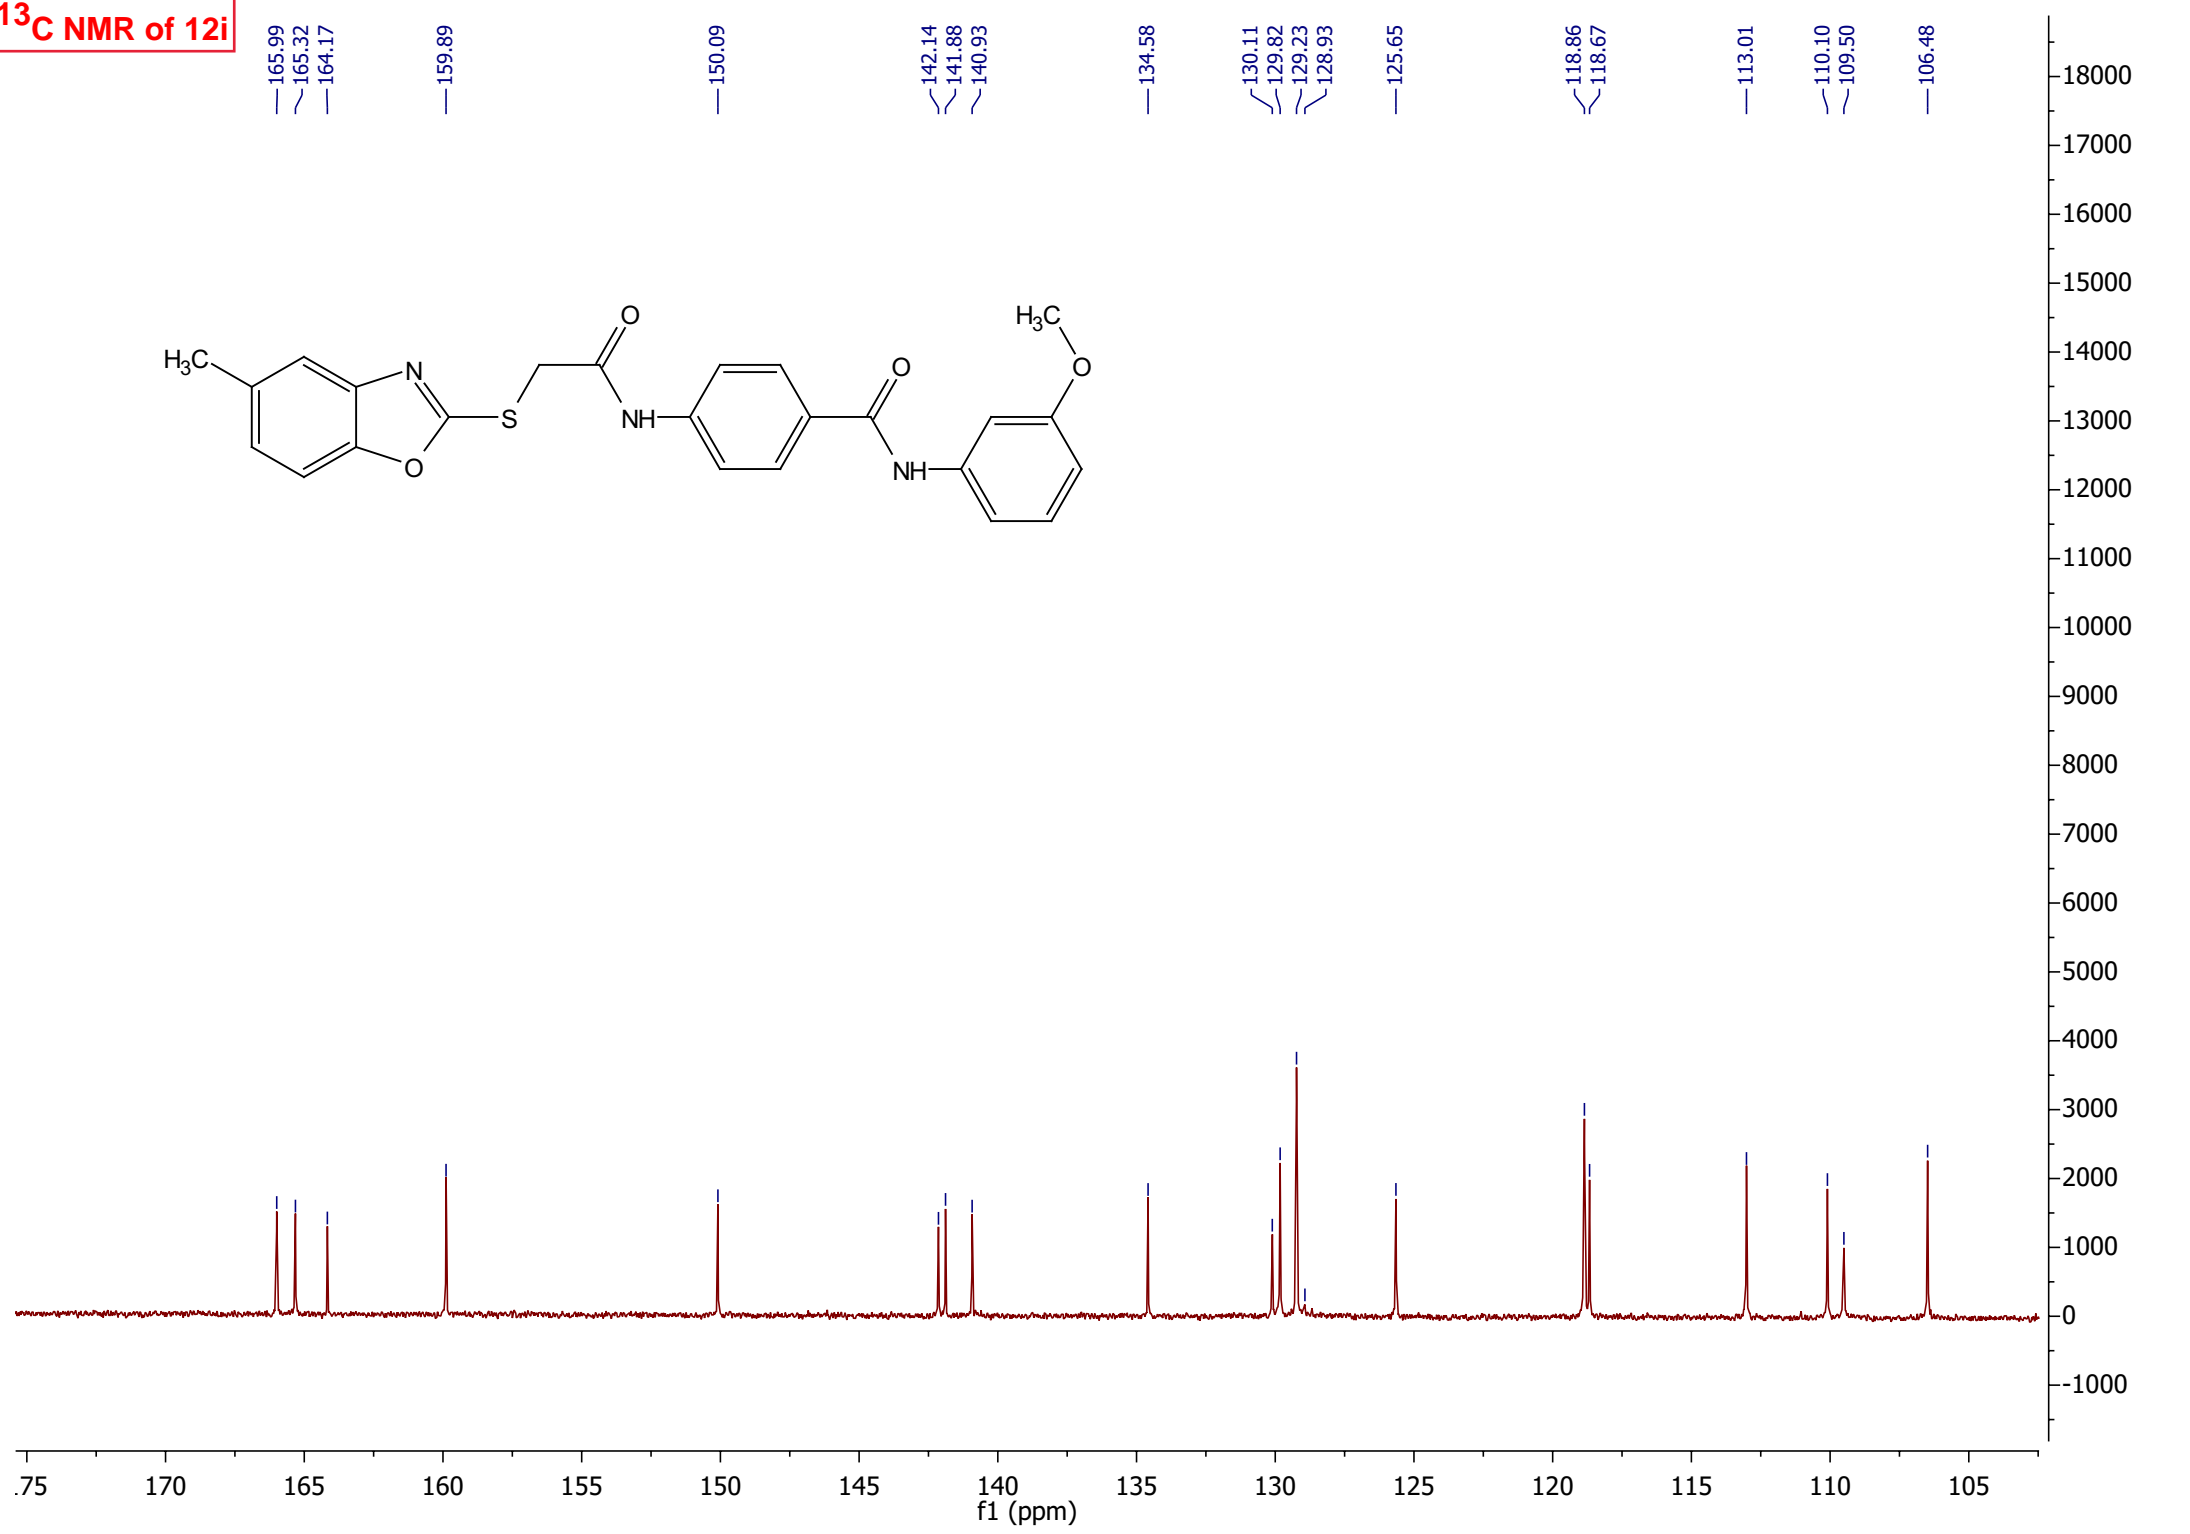

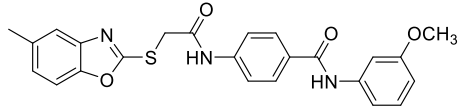

Mass spec. of 12i

RT: 0.00 - 4.52 SM: 7G

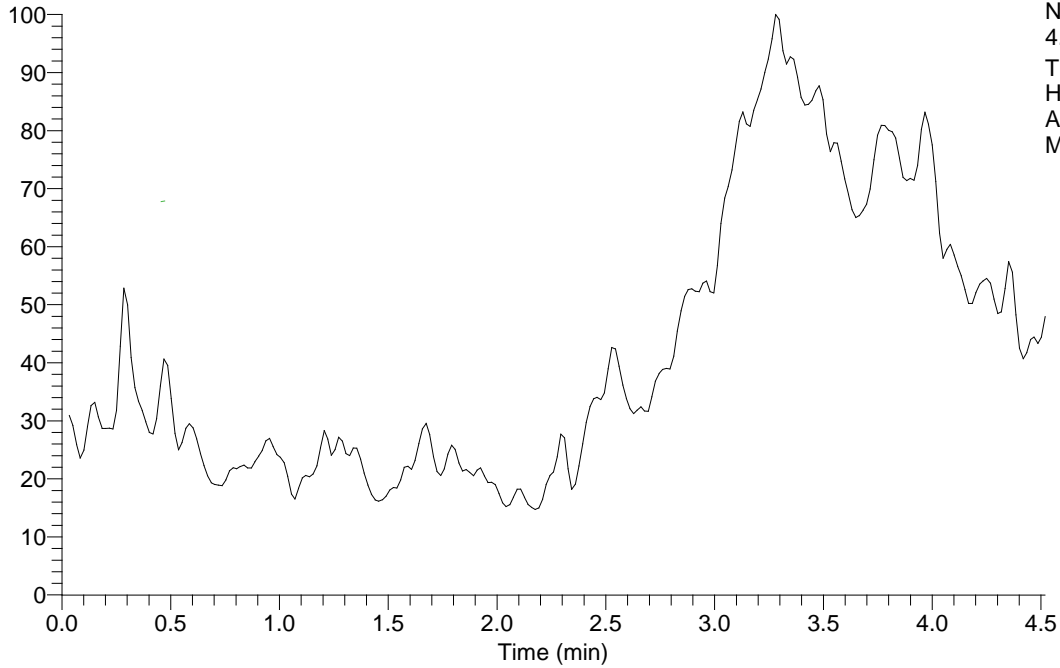

Hazem-Abdelhady-MBA5 #202 RT: 3.40 AV: 1 NL: 6.55E3  
T: + c EI Full ms [40.00-1000.00]

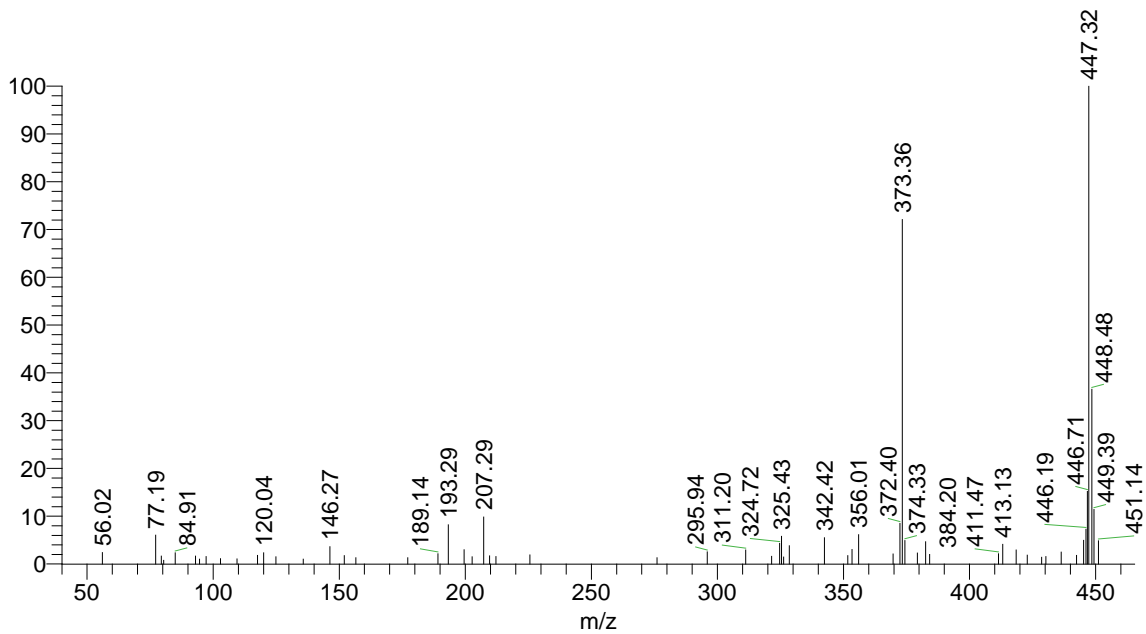



# IR Of Comp. 12j

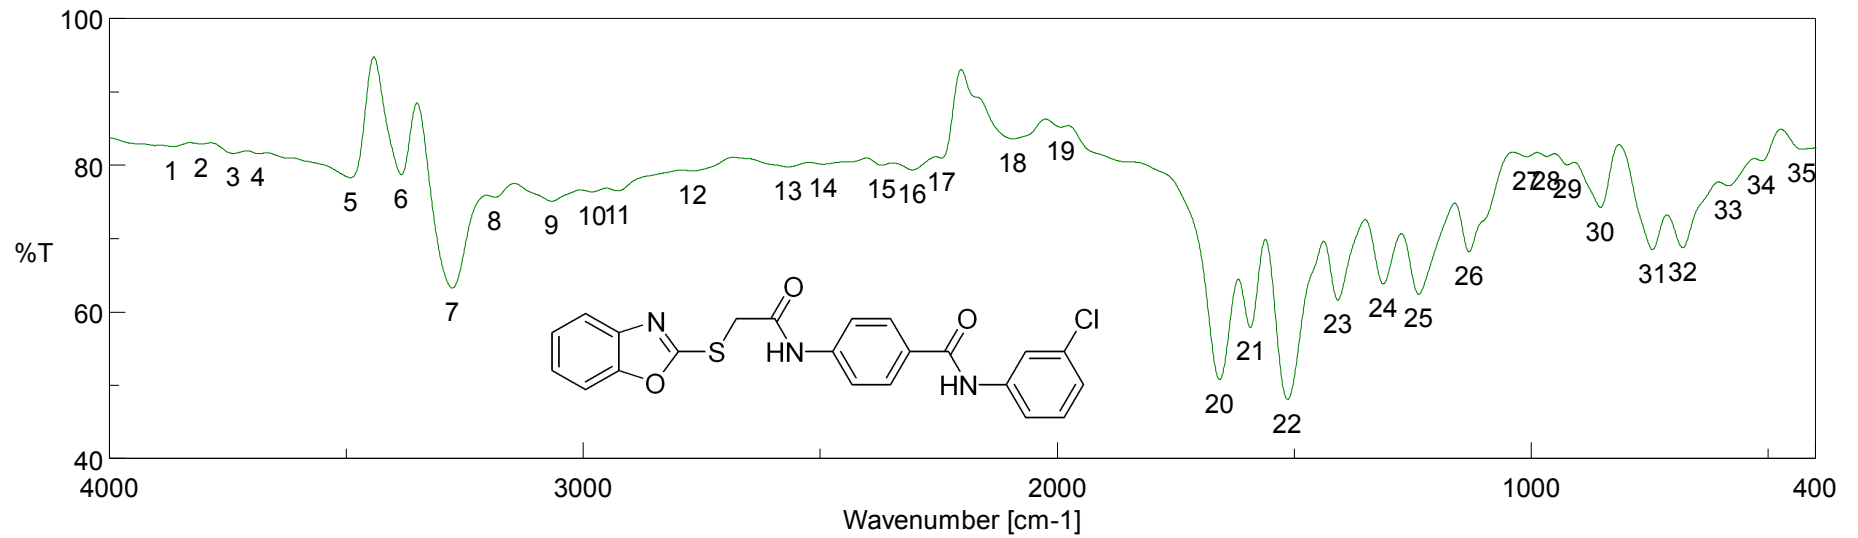

## [ Result of Peak Picking ]

| No. | Position | Intensity | No. | Position | Intensity | No. | Position | Intensity | No. | Position | Intensity |
|-----|----------|-----------|-----|----------|-----------|-----|----------|-----------|-----|----------|-----------|
| 1   | 3869.47  | 82.5123   | 2   | 3805.83  | 82.8307   | 3   | 3738.33  | 81.5663   | 4   | 3685.3   | 81.5565   |
| 5   | 3491.49  | 78.2667   | 6   | 3384.46  | 78.6759   | 7   | 3276.47  | 63.2115   | 8   | 3186.79  | 75.6017   |
| 9   | 3066.26  | 75.0539   | 10  | 2981.41  | 76.326    | 11  | 2927.41  | 76.4633   | 12  | 2769.28  | 79.1763   |
| 13  | 2567.75  | 79.7397   | 14  | 2494.47  | 80.1086   | 15  | 2371.05  | 79.966    | 16  | 2305.48  | 79.3266   |
| 17  | 2243.77  | 80.9249   | 18  | 2093.35  | 83.5628   | 19  | 1992.11  | 85.1515   | 20  | 1657.52  | 50.7472   |
| 21  | 1591.95  | 57.8468   | 22  | 1513.85  | 48.0363   | 23  | 1407.78  | 61.5913   | 24  | 1312.32  | 63.8029   |
| 25  | 1237.11  | 62.3758   | 26  | 1131.05  | 68.1626   | 27  | 1009.55  | 81.1209   | 28  | 967.126  | 81.1564   |
| 29  | 922.771  | 80.0238   | 30  | 853.347  | 74.2327   | 31  | 743.424  | 68.4675   | 32  | 679.785  | 68.7035   |
| 33  | 583.361  | 77.1587   | 34  | 512.972  | 80.5657   | 35  | 428.12   | 82.1351   |     |          |           |

**<sup>1</sup>H NMR of 12j**

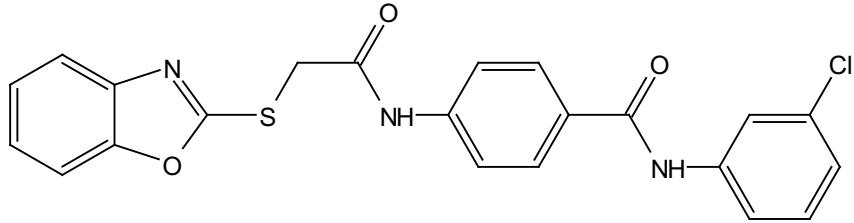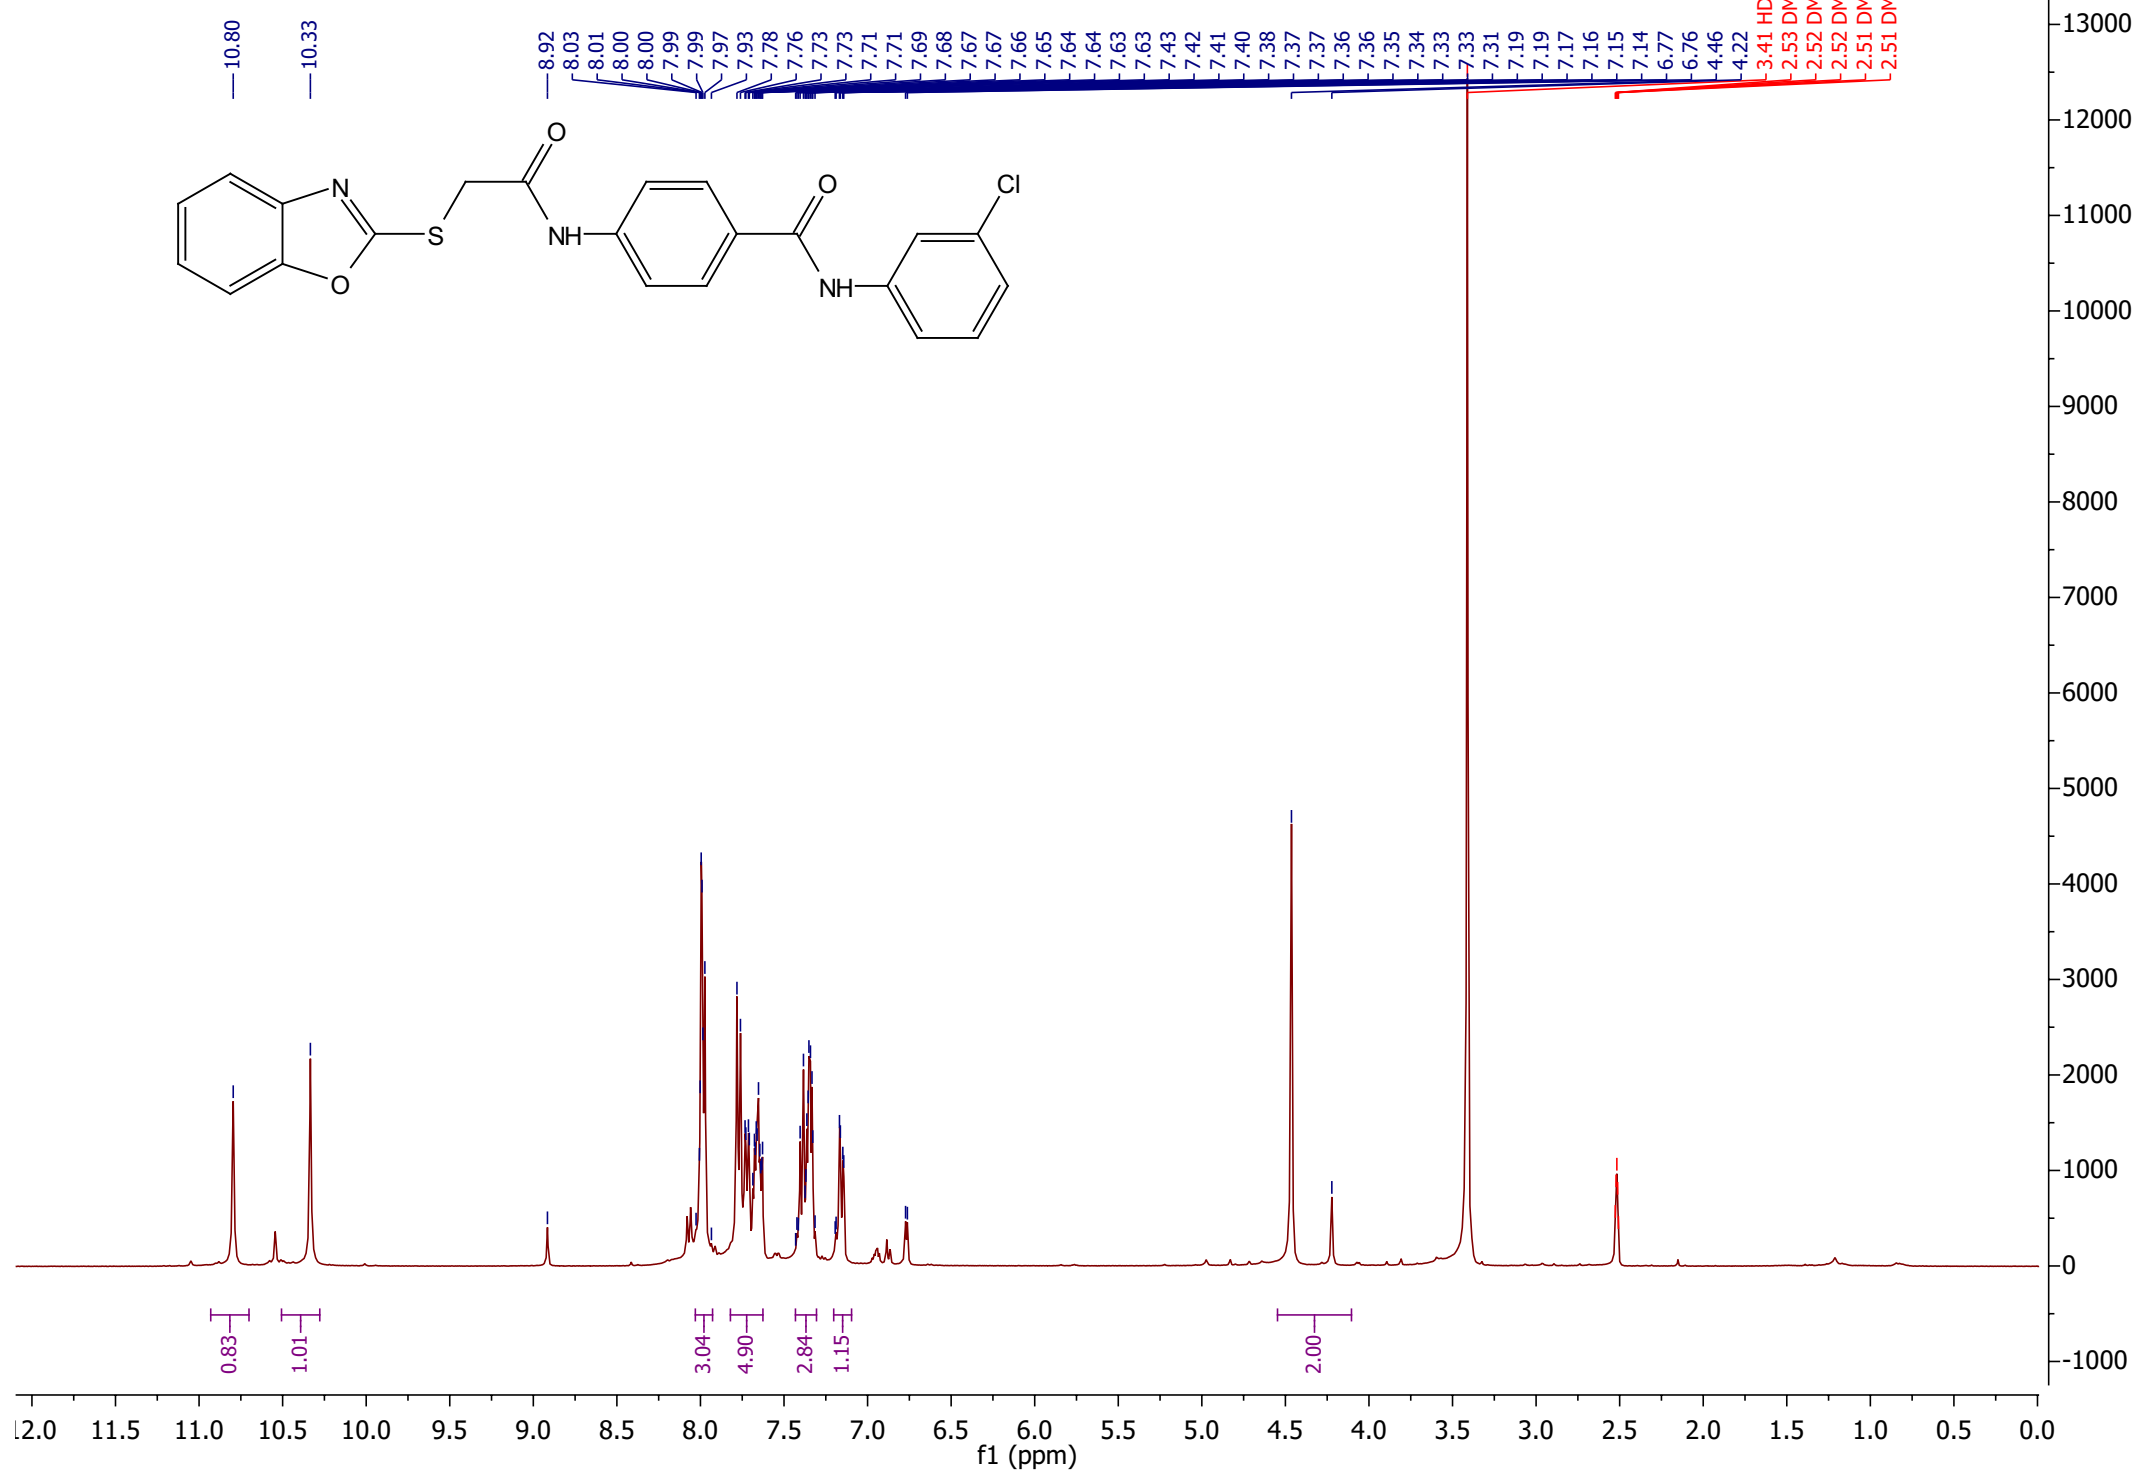

**<sup>1</sup>H NMR of 12j**



8.03, 8.01, 8.00, 7.99, 7.99, 7.97, 7.93, 7.78, 7.76, 7.73, 7.73, 7.71, 7.71, 7.69, 7.68, 7.67, 7.67, 7.66, 7.65, 7.64, 7.64, 7.63, 7.63, 7.43, 7.42, 7.41, 7.40, 7.38, 7.37, 7.37, 7.36, 7.36, 7.35, 7.34, 7.33, 7.33, 7.31, 7.19, 7.19, 7.17, 7.16, 7.15, 7.14, 6.77, 6.76

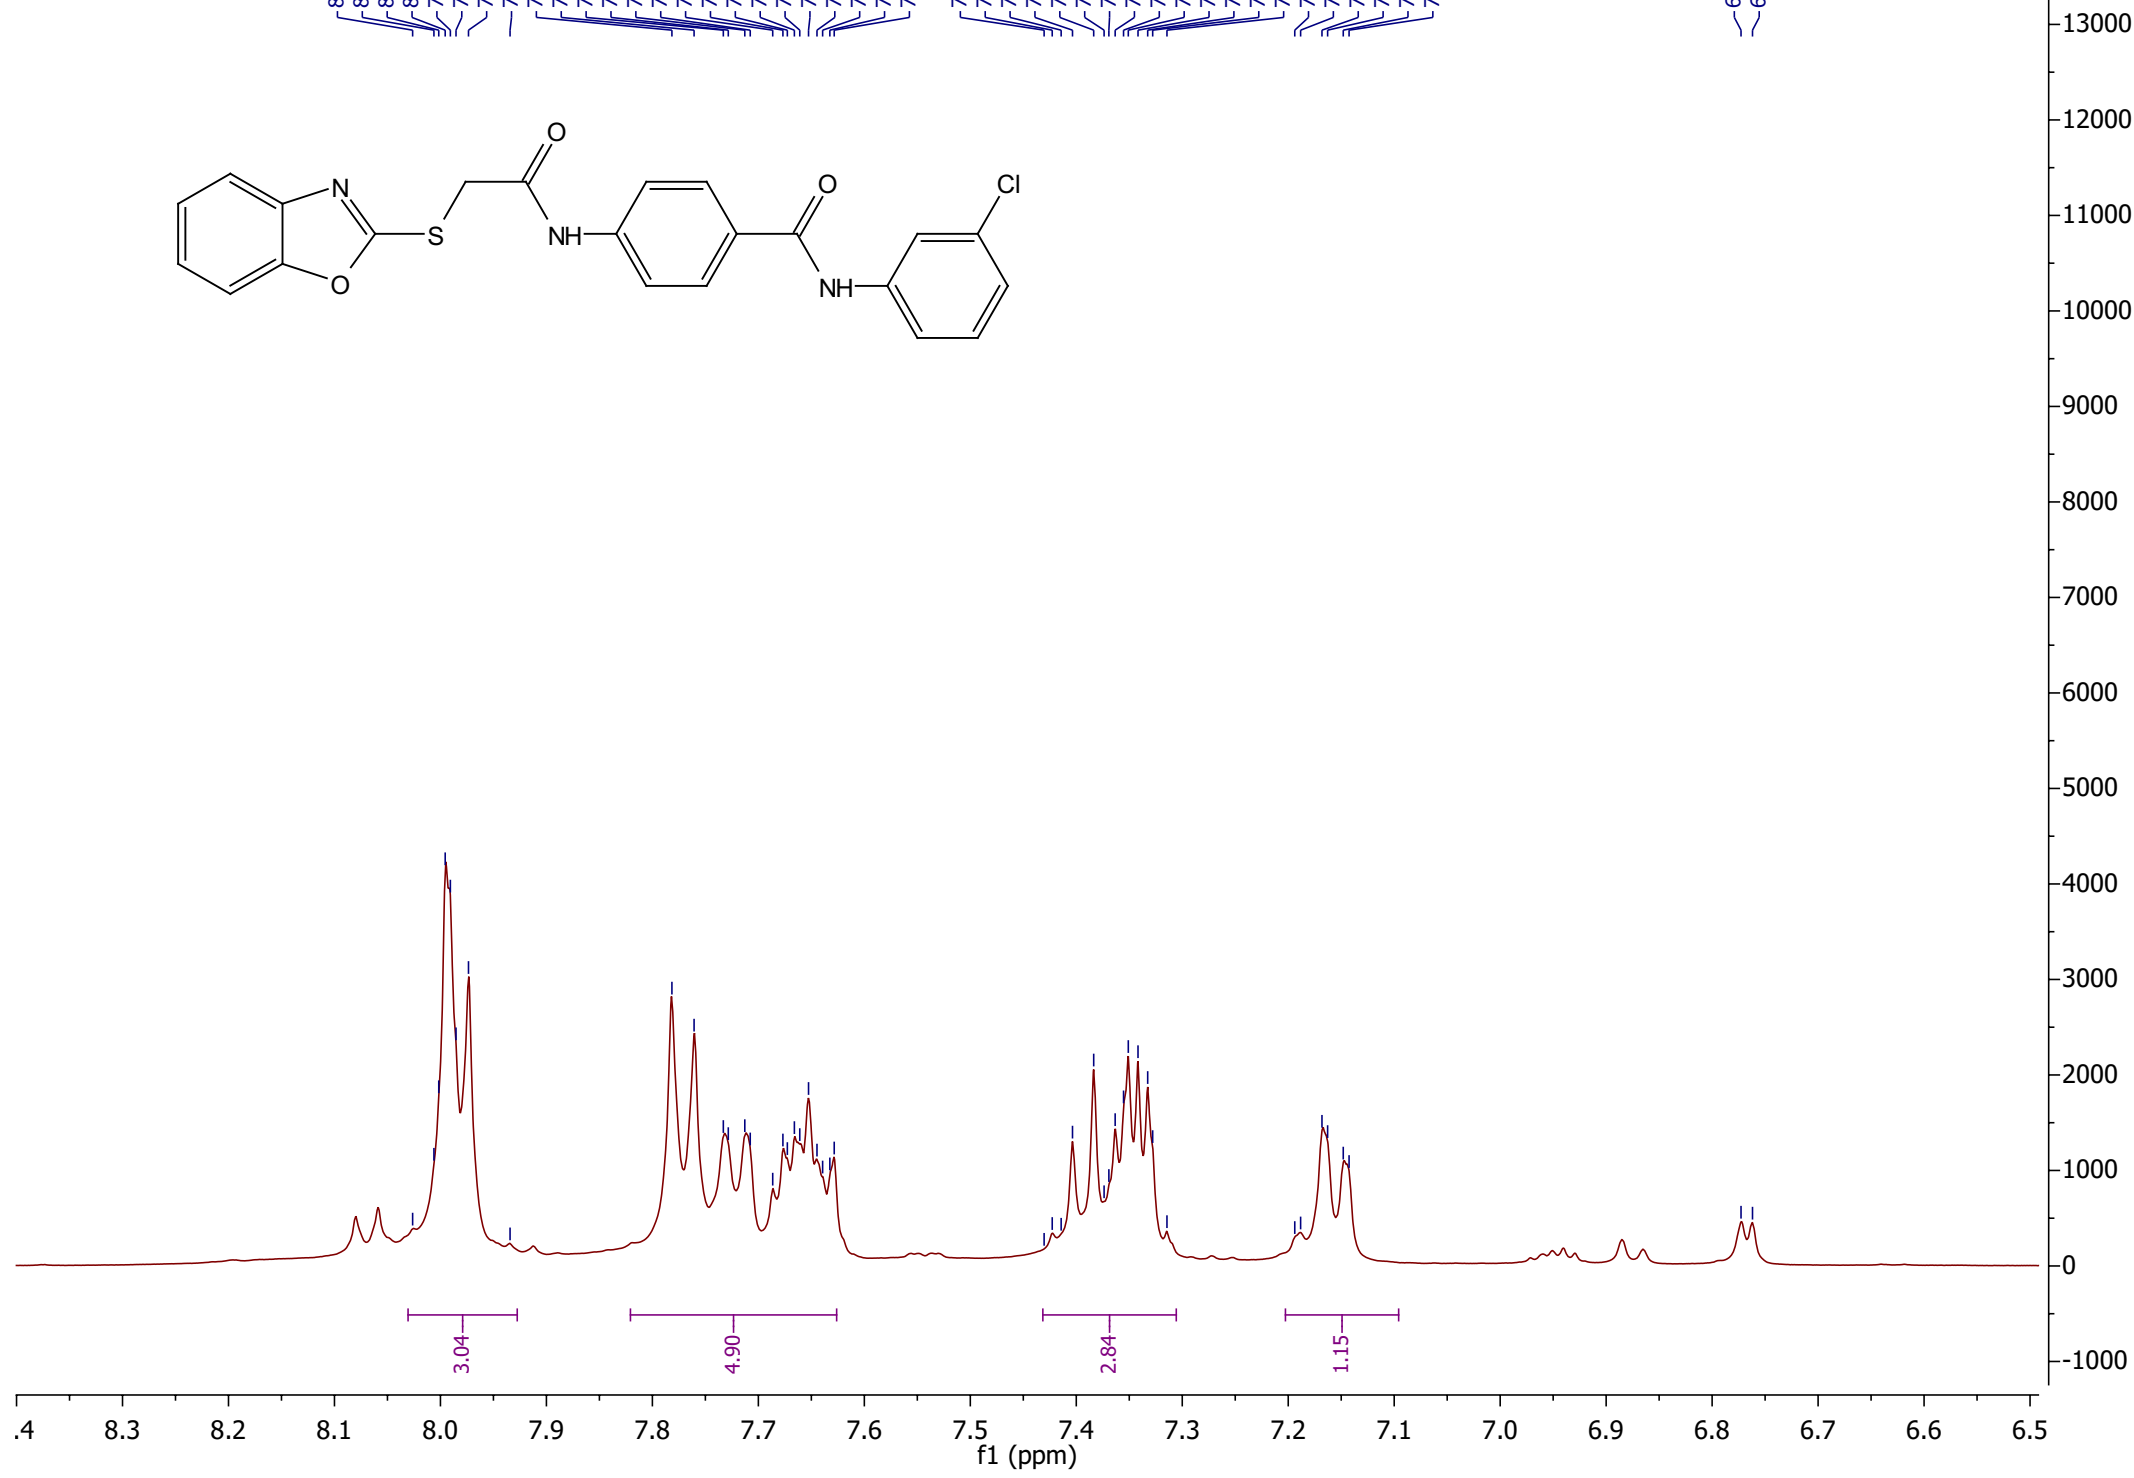

**<sup>1</sup>H NMR of 12j**

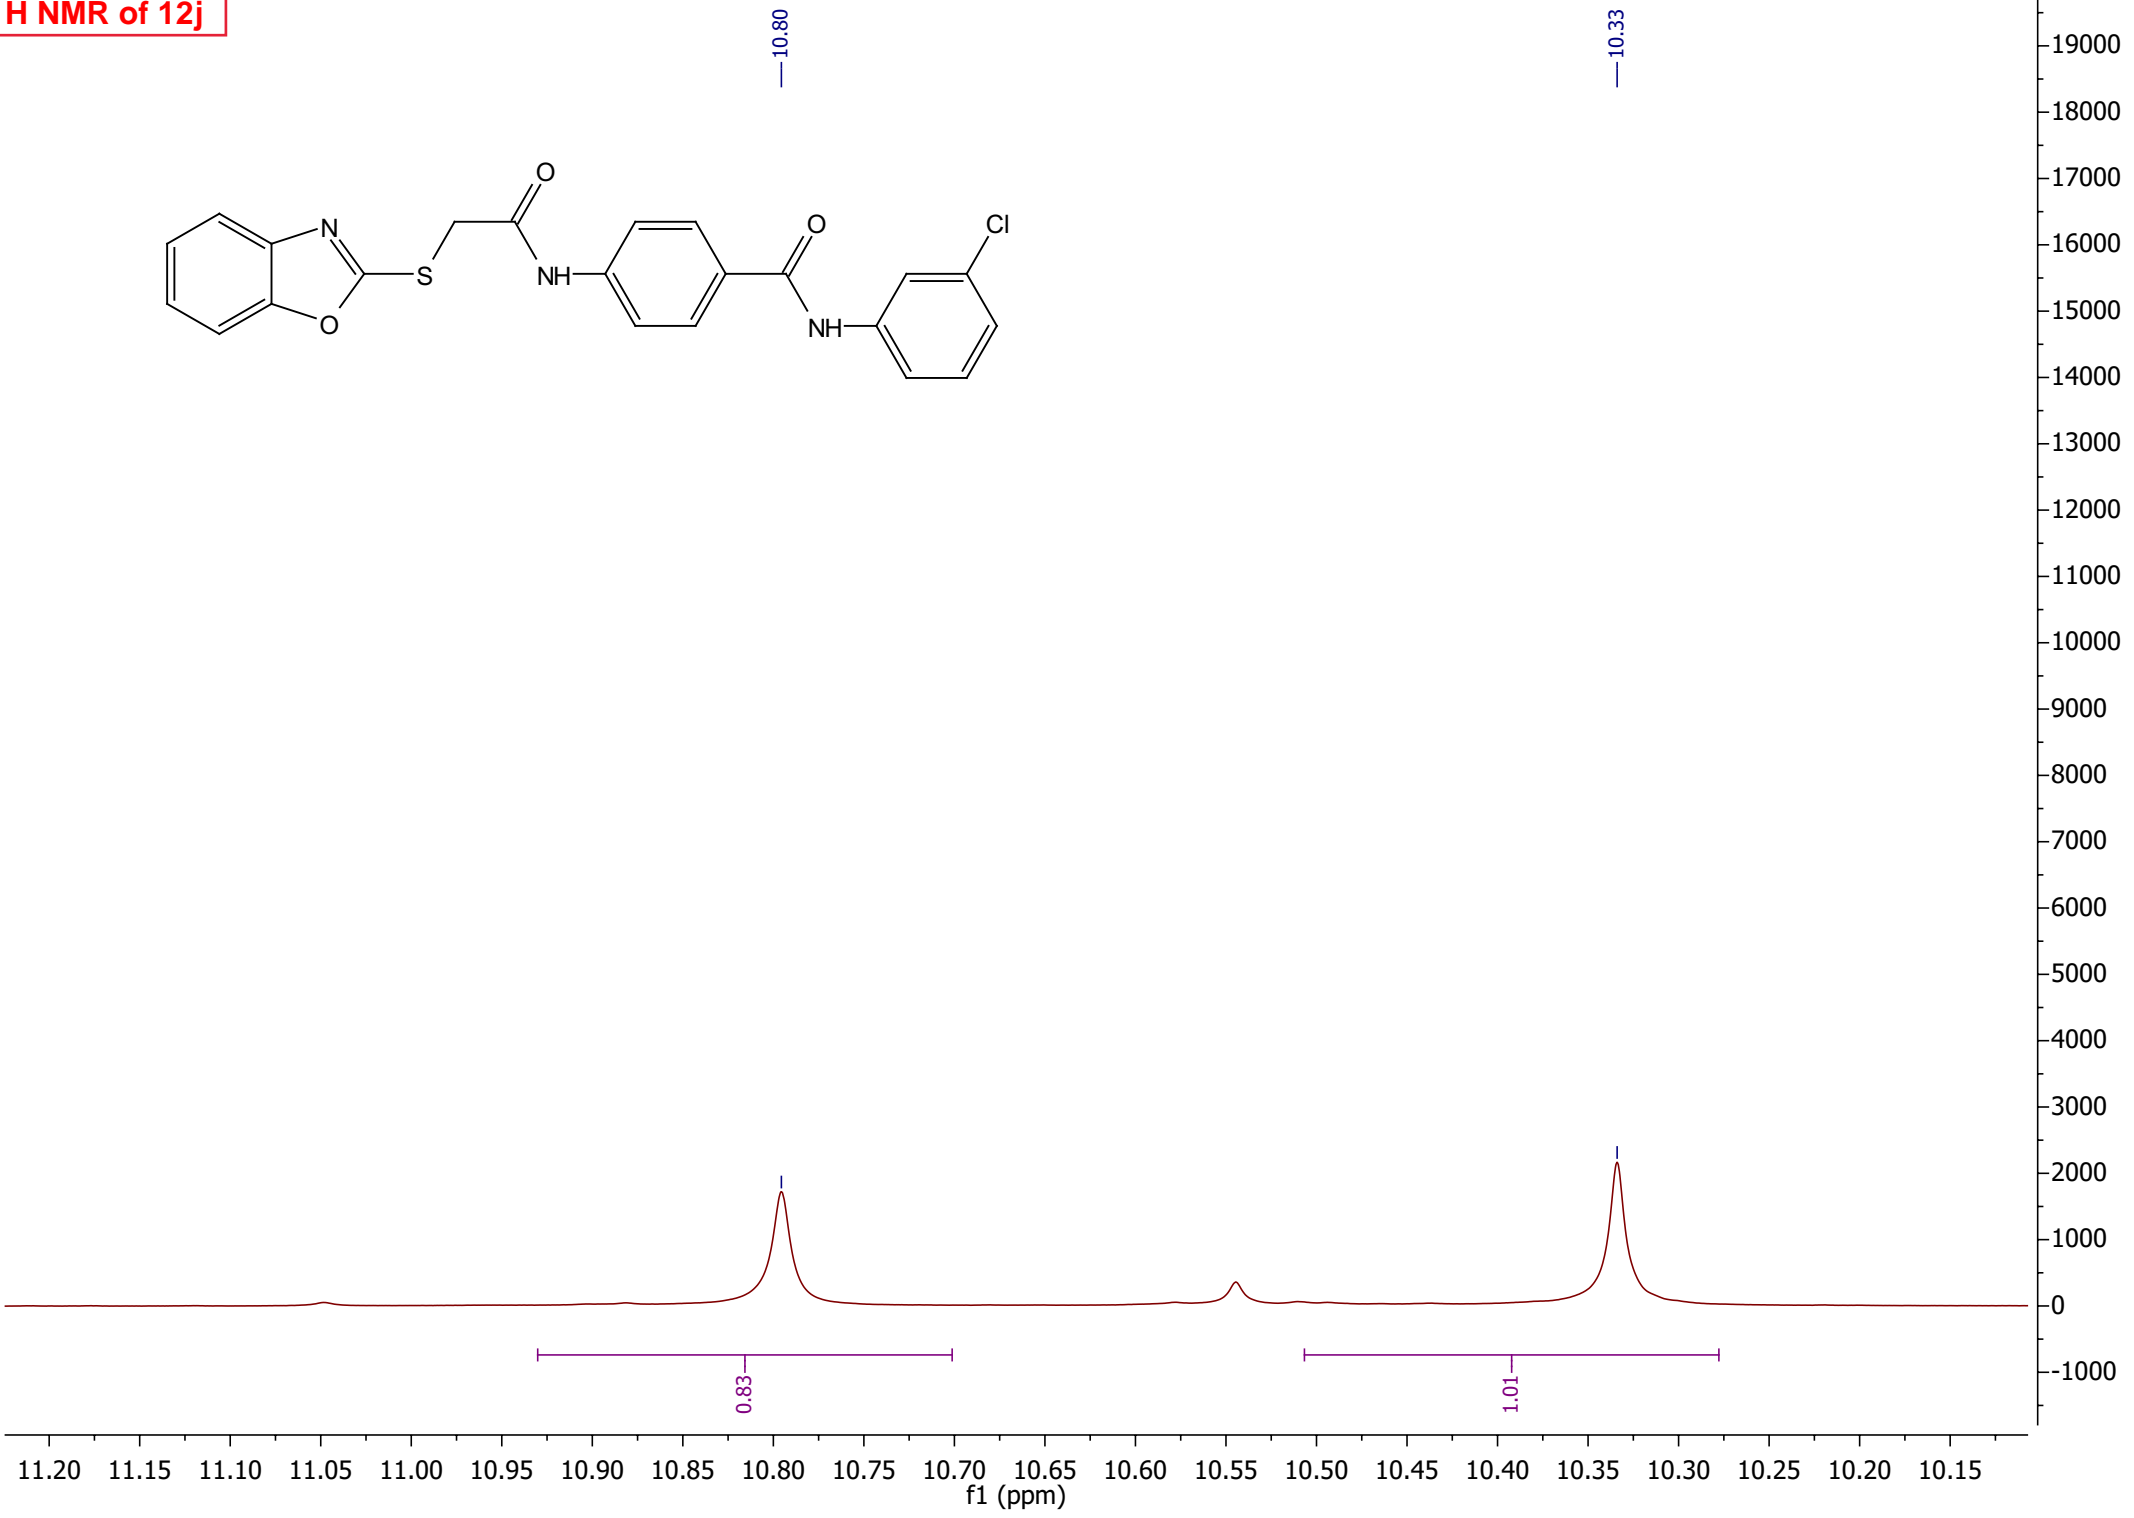

**<sup>13</sup>C NMR of 12j**



166.00  
165.55  
164.30  
151.83  
142.34  
141.68  
141.23  
133.41  
130.75  
129.34  
124.85  
120.16  
118.92  
118.74  
110.72

40.60 DMSO  
40.40 DMSO  
40.19 DMSO  
39.98 DMSO  
39.77 DMSO  
39.56 DMSO  
39.35 DMSO  
37.29

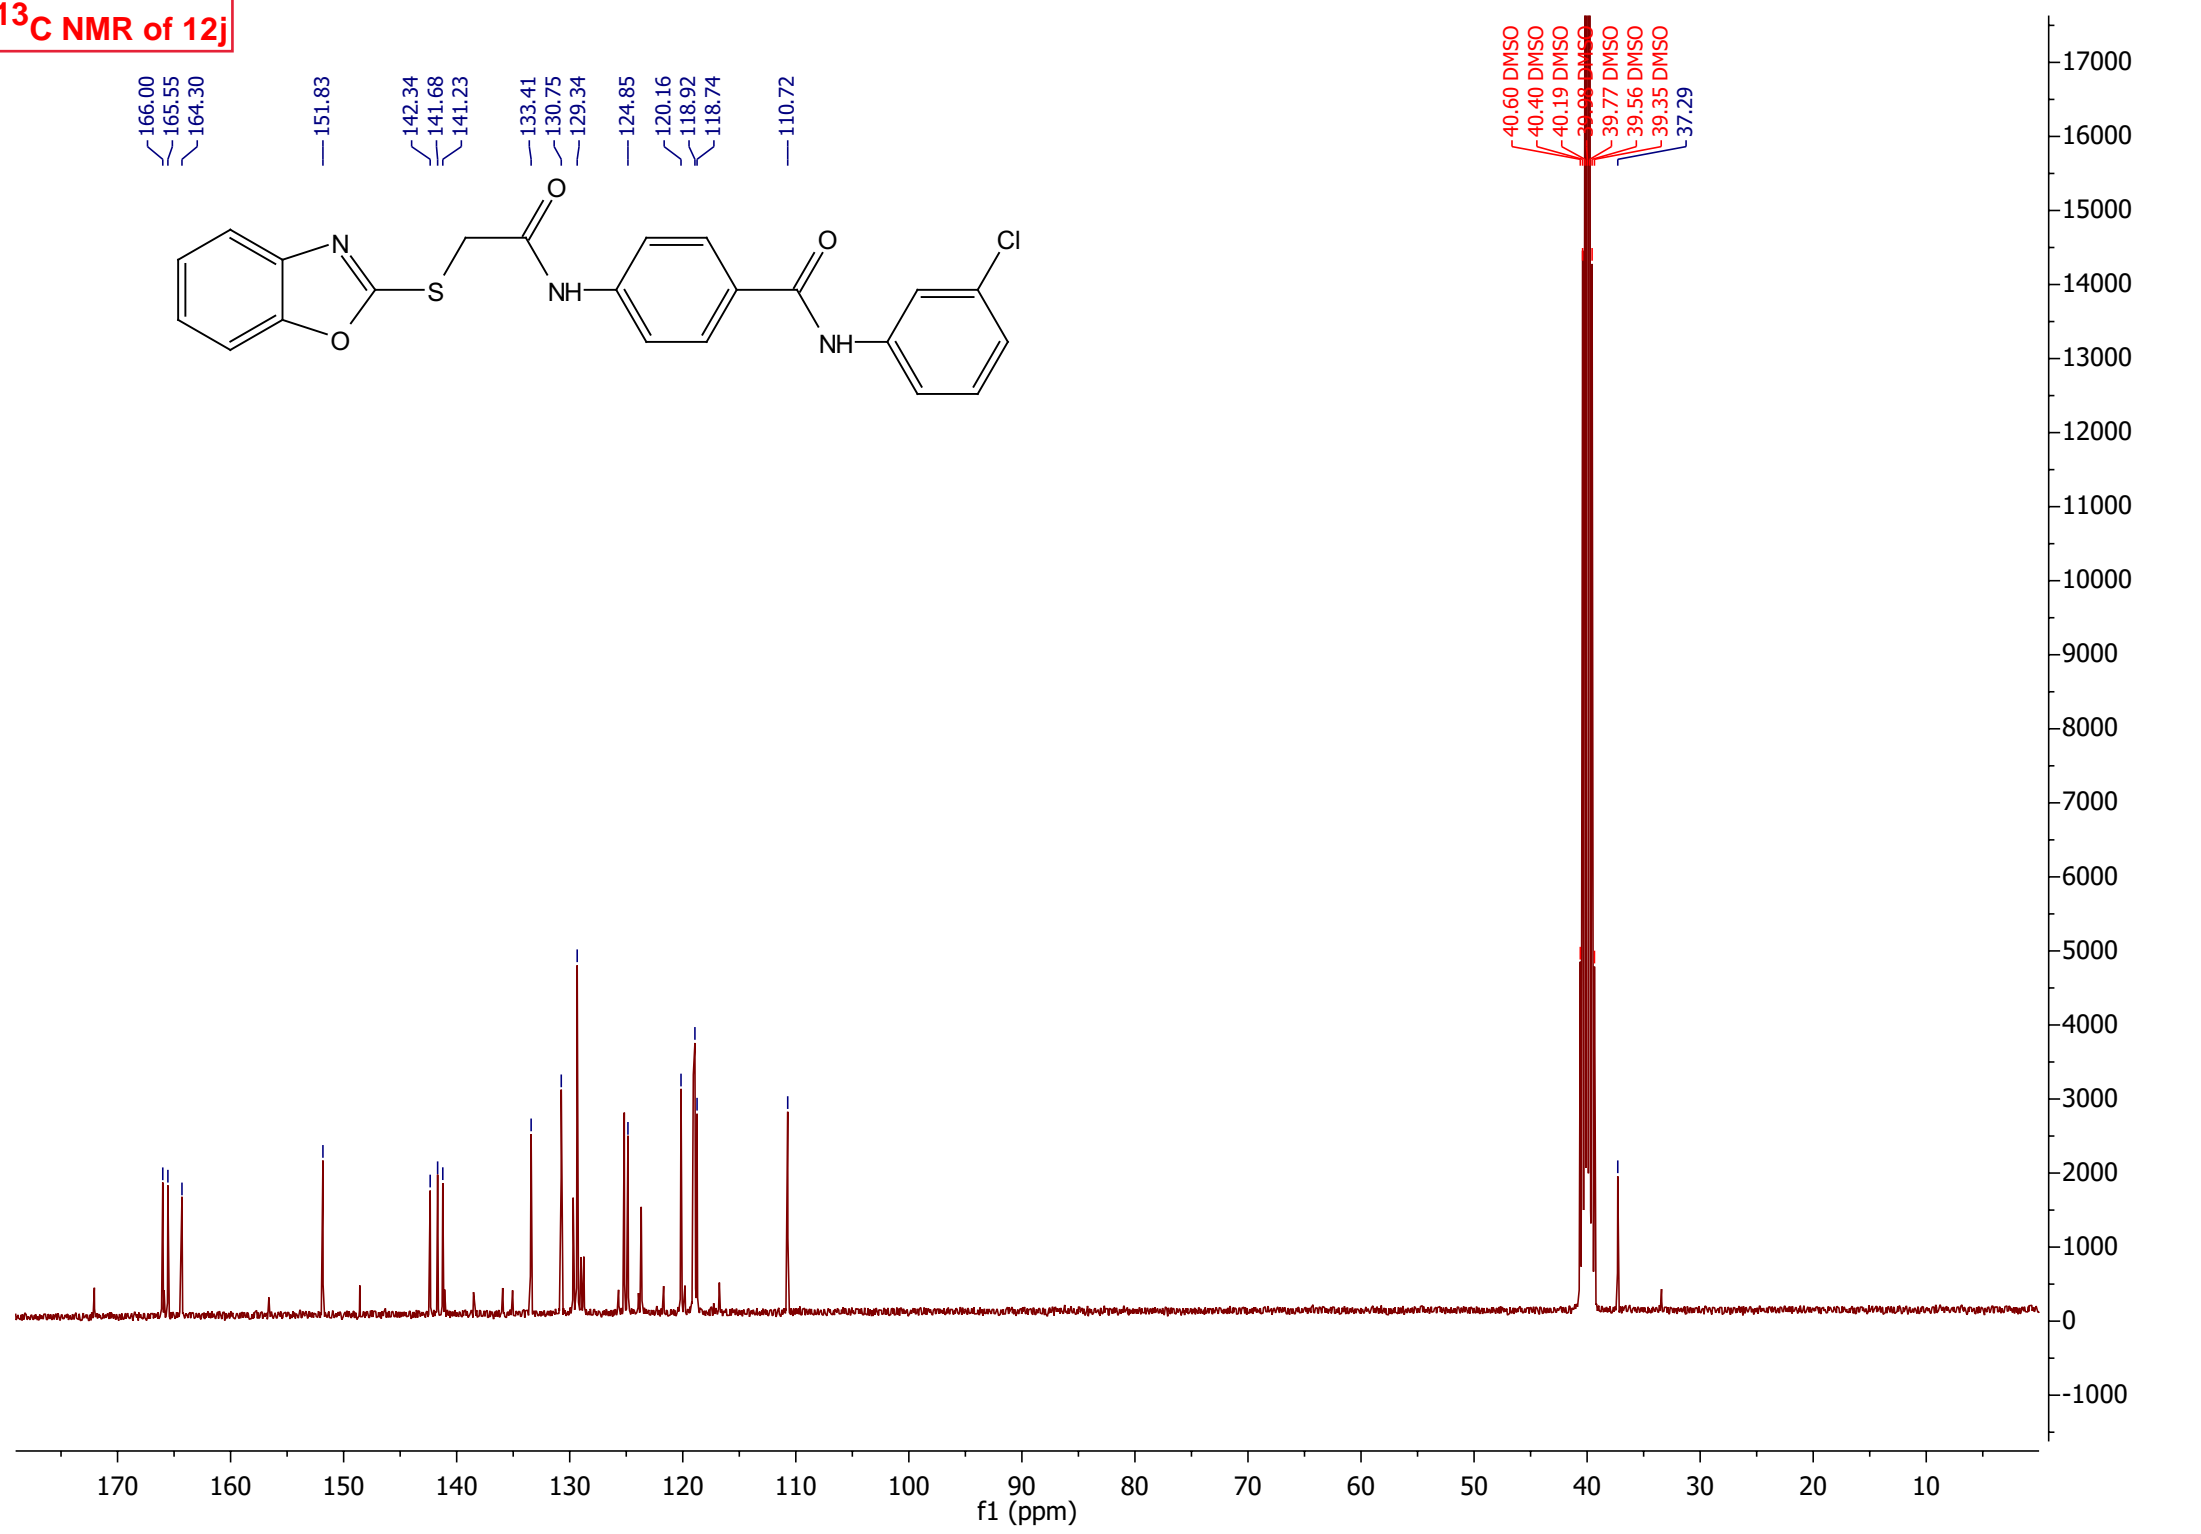

**<sup>13</sup>C NMR of 12j**

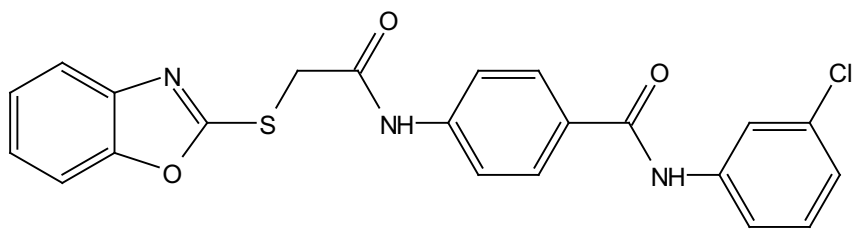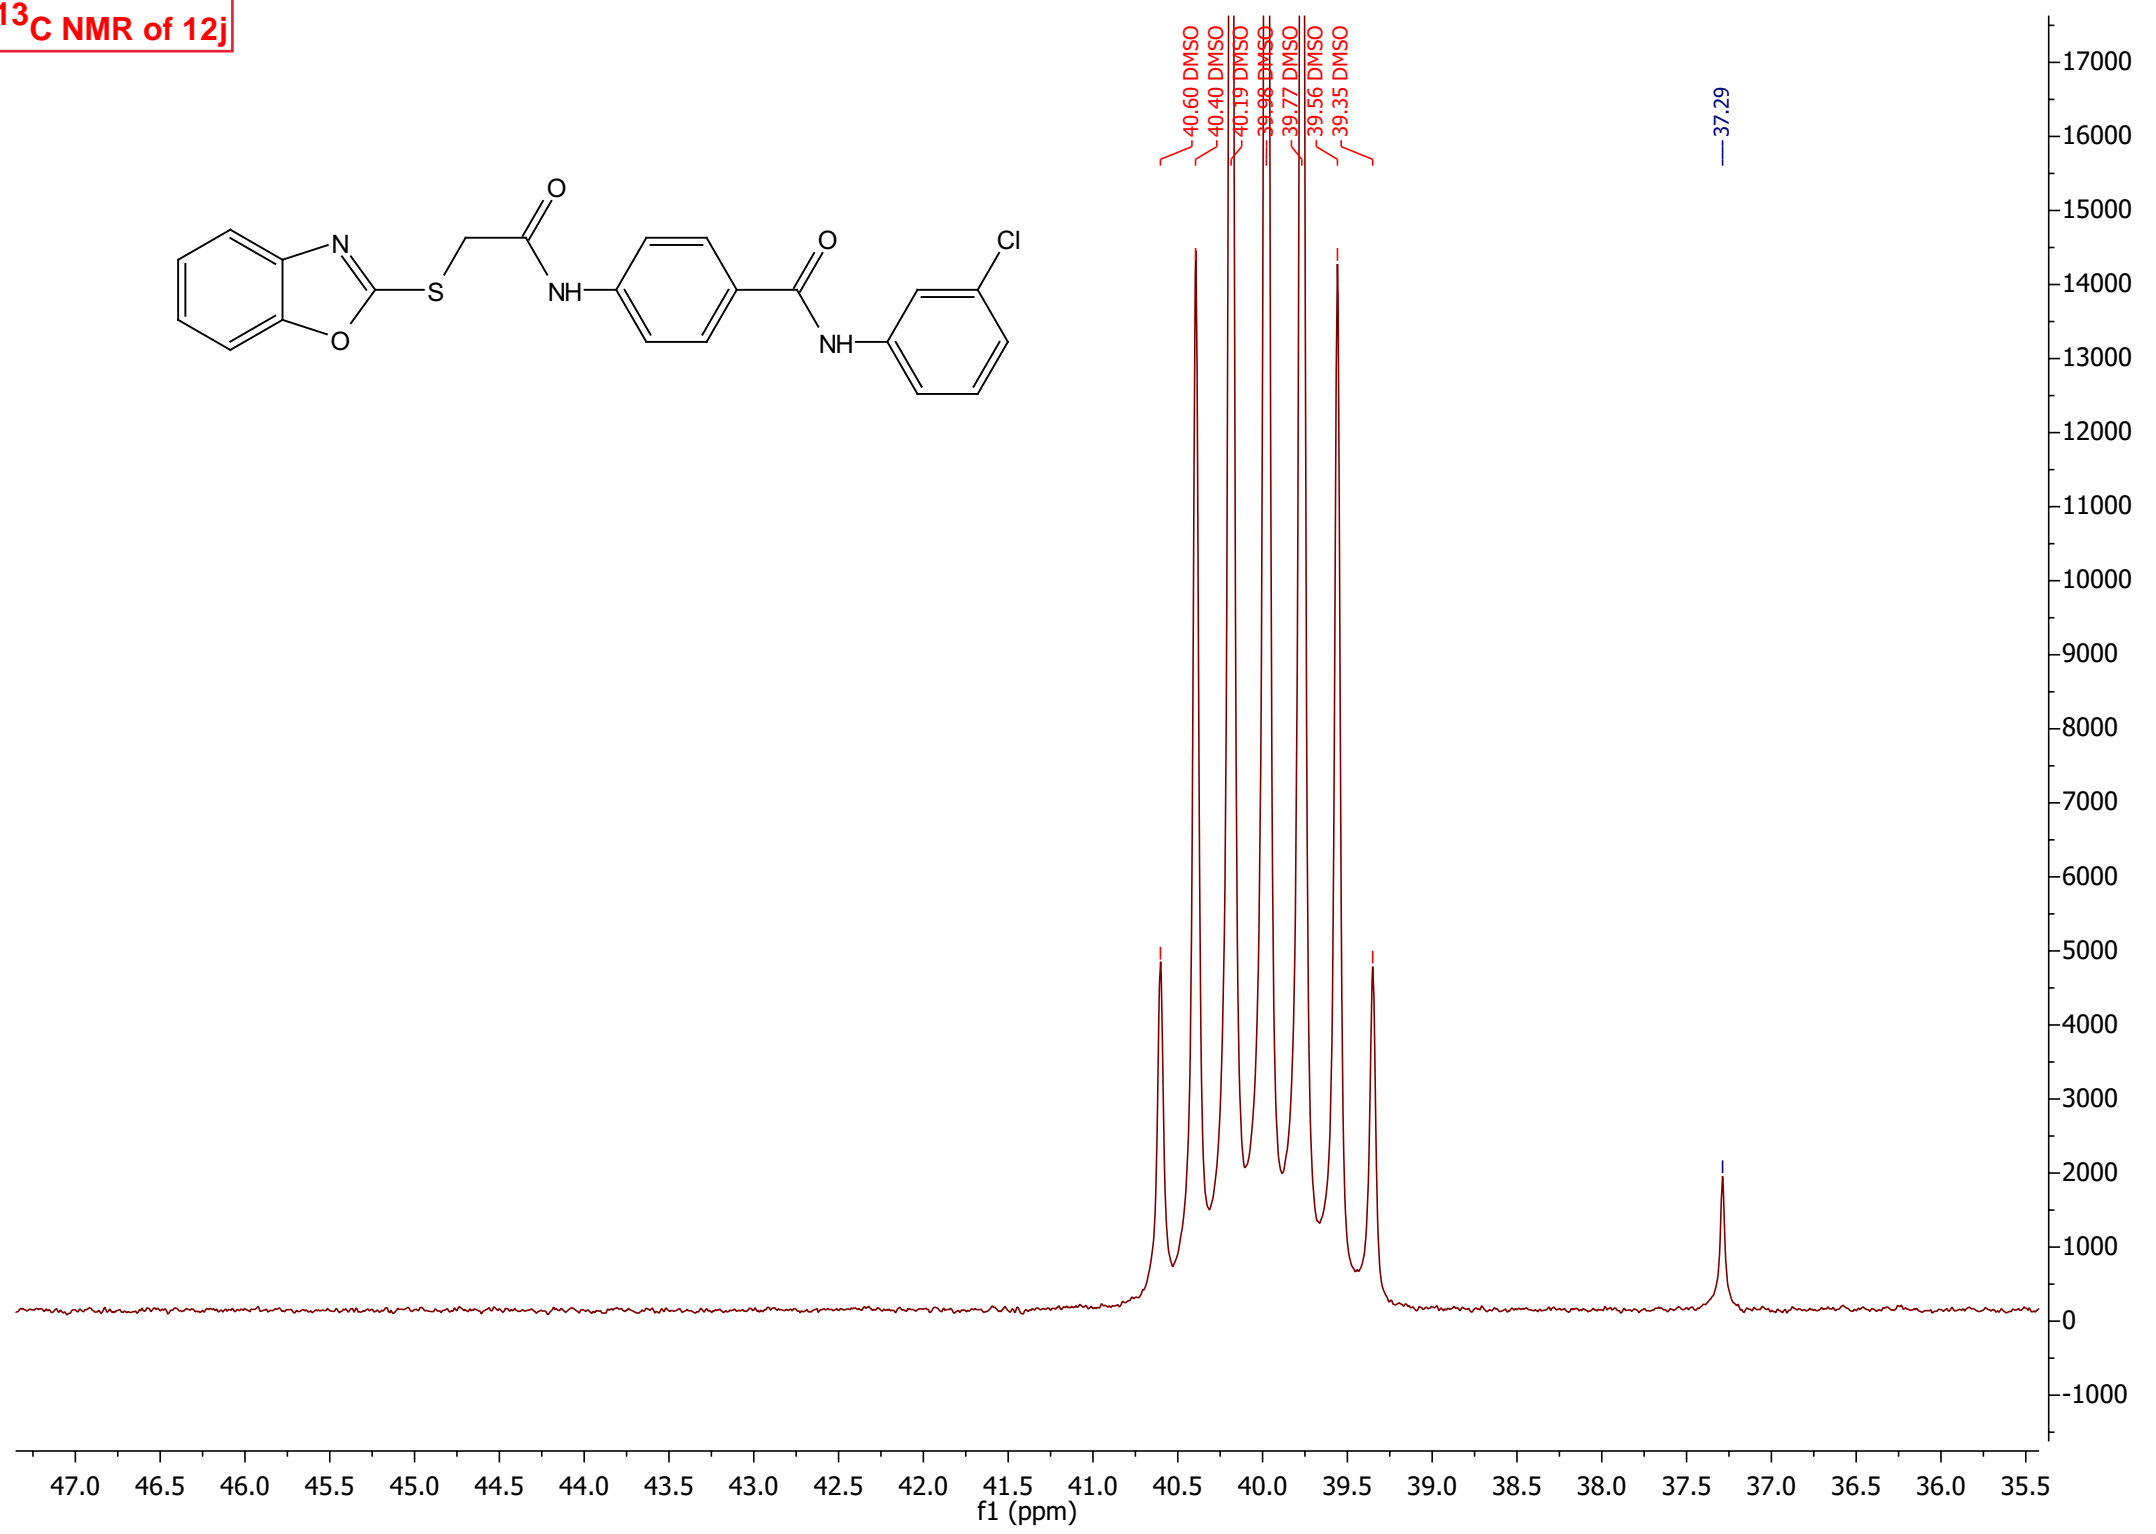

**<sup>13</sup>C NMR of 12j**



166.00  
165.55  
164.30

151.83

142.34  
141.68  
141.23

133.41

130.75

129.34

124.85

120.16  
118.92  
118.74

110.72

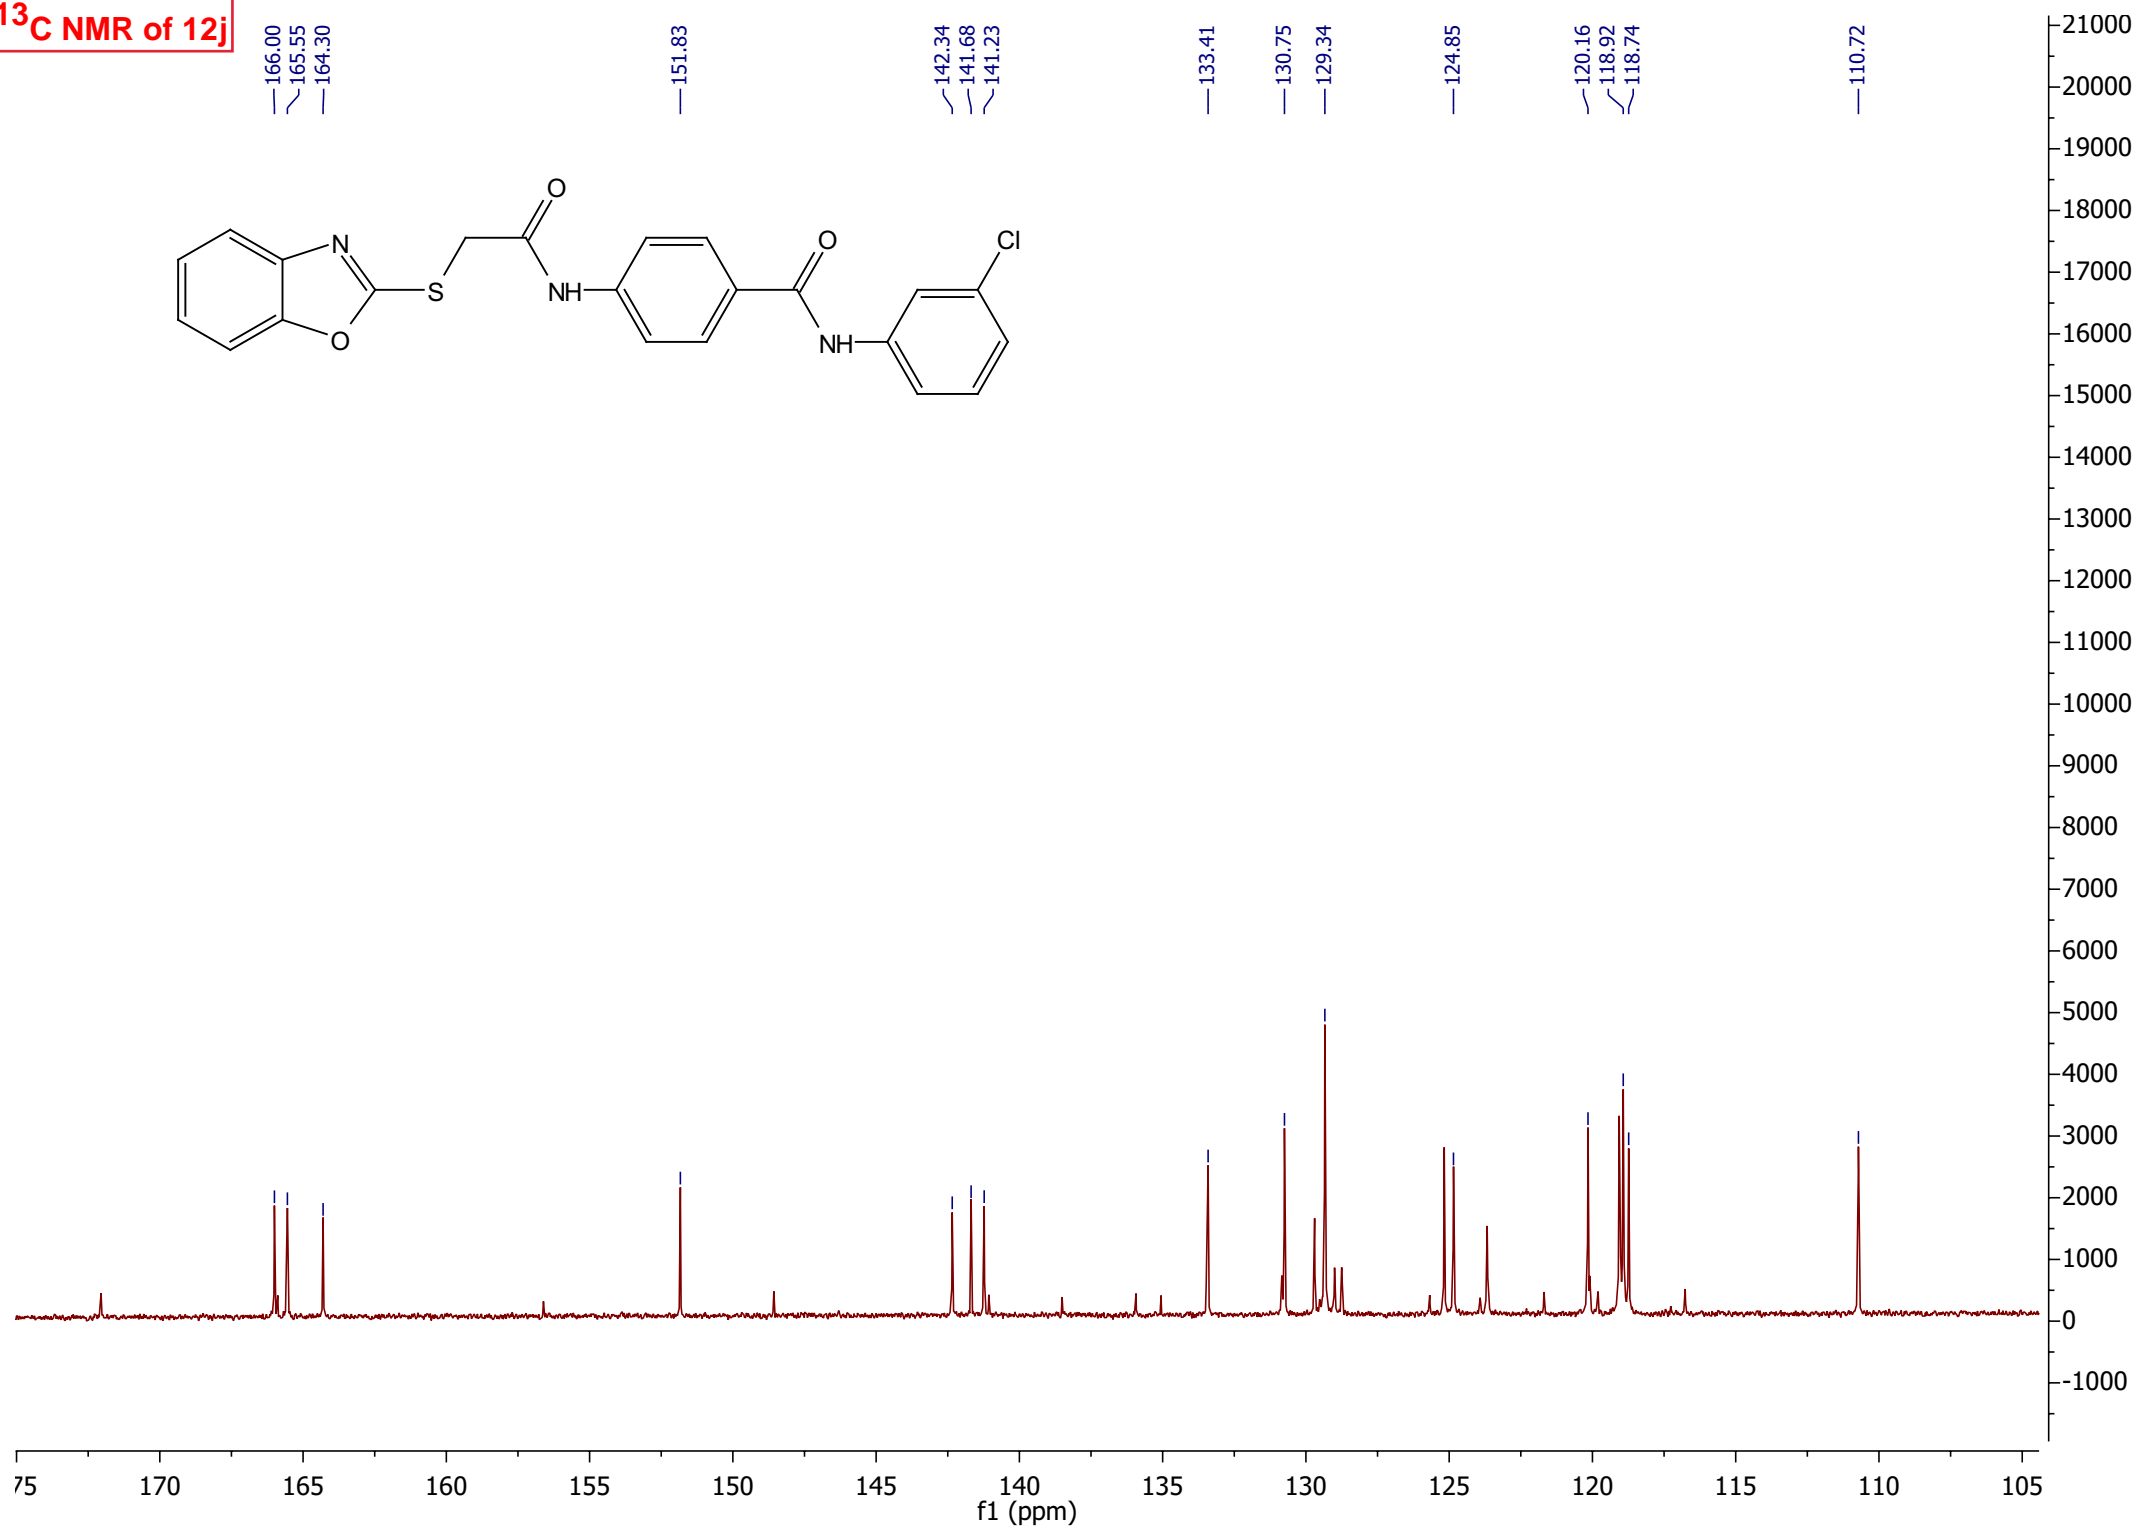

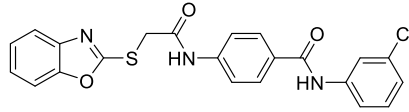

Mass spec. of 12j

RT: 0.00 - 5.64 SM: 7G

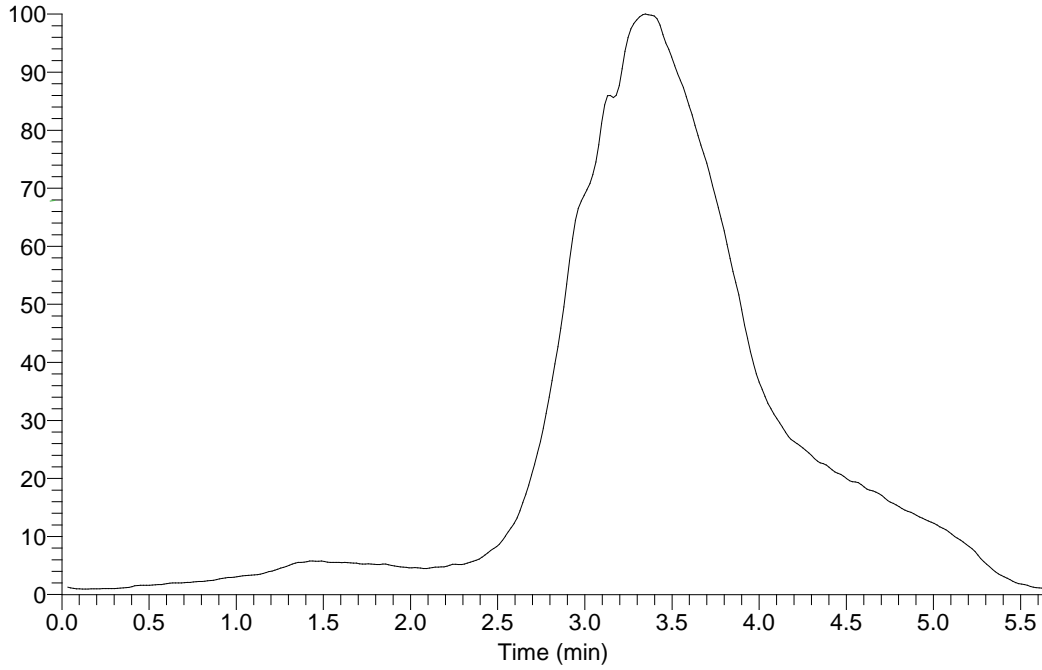

NL:  
1.42E7  
TIC MS  
Hazem-  
Abdelhady-  
PBA6

Hazem-Abdelhady-PBA6 #331 RT: 5.56 AV: 1 NL: 3.29E4  
T: + c EI Full ms [40.00-1000.00]

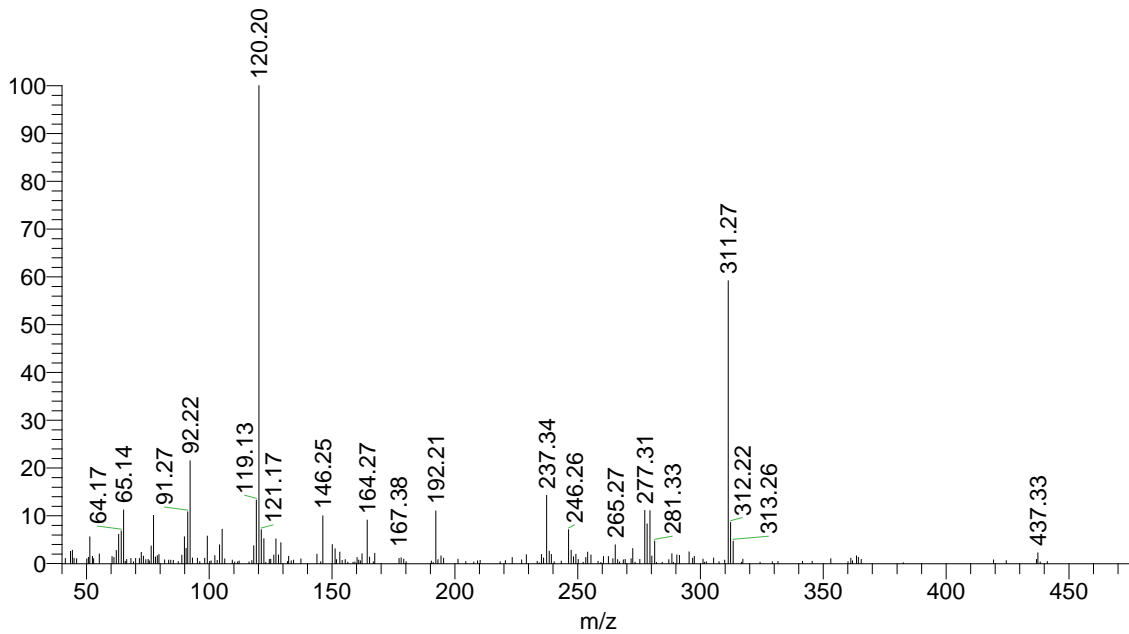



# IR Of Comp. 12k

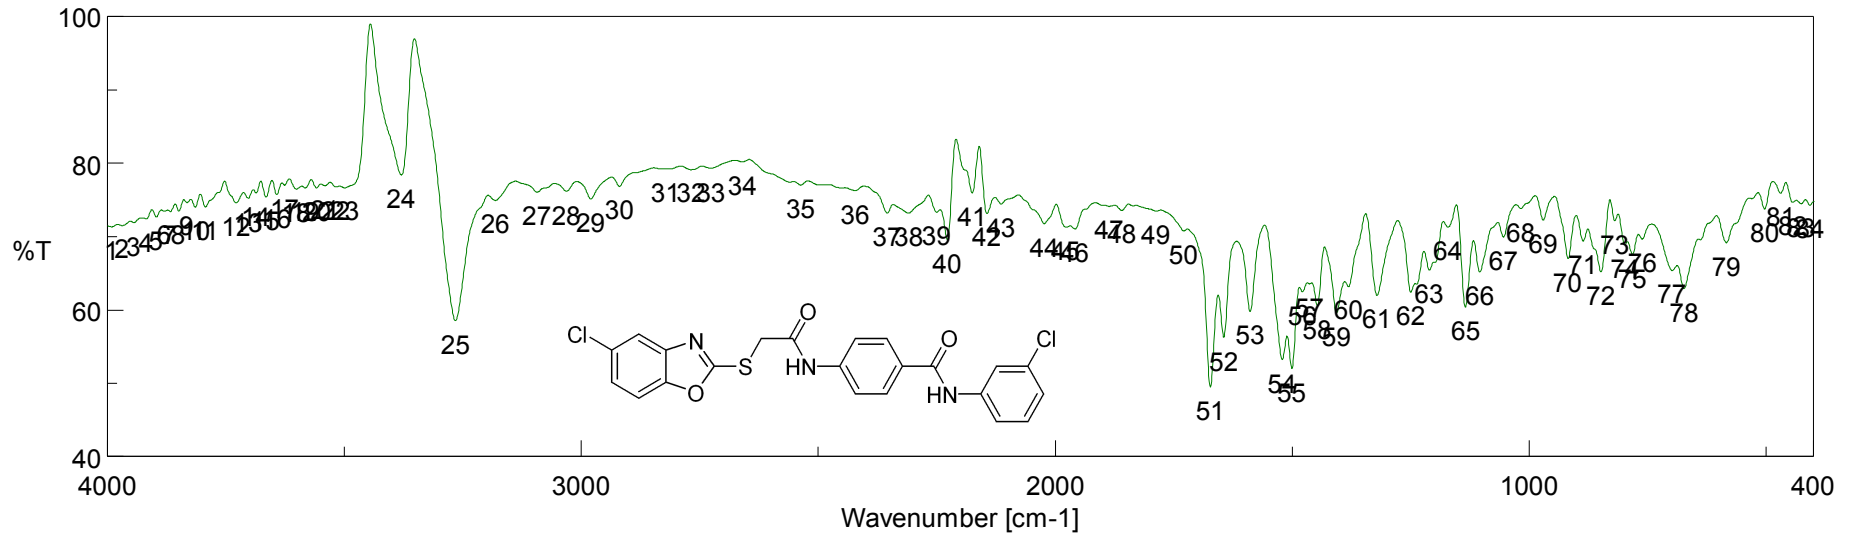

## [ Result of Peak Picking ]

| No. | Position | Intensity | No. | Position | Intensity | No. | Position | Intensity | No. | Position | Intensity |
|-----|----------|-----------|-----|----------|-----------|-----|----------|-----------|-----|----------|-----------|
| 1   | 3990.96  | 71.294    | 2   | 3968.78  | 71.4774   | 3   | 3944.68  | 71.8733   | 4   | 3917.68  | 72.3984   |
| 5   | 3897.43  | 72.6204   | 6   | 3880.08  | 73.4161   | 7   | 3867.54  | 73.3792   | 8   | 3850.18  | 73.4256   |
| 9   | 3832.83  | 74.6036   | 10  | 3814.51  | 73.9844   | 11  | 3793.29  | 73.9895   | 12  | 3728.69  | 74.5611   |
| 13  | 3702.66  | 75.1883   | 14  | 3686.26  | 75.9155   | 15  | 3666.02  | 75.3447   | 16  | 3642.87  | 75.6807   |
| 17  | 3626.48  | 76.974    | 18  | 3601.41  | 76.4374   | 19  | 3583.09  | 76.617    | 20  | 3558.99  | 76.5981   |
| 21  | 3541.63  | 76.8869   | 22  | 3517.52  | 76.7221   | 23  | 3499.2   | 76.6079   | 24  | 3379.64  | 78.3773   |
| 25  | 3265.86  | 58.4985   | 26  | 3181.97  | 74.8806   | 27  | 3093.26  | 76.0101   | 28  | 3031.55  | 76.1391   |
| 29  | 2980.45  | 75.0701   | 30  | 2919.7   | 76.8003   | 31  | 2822.31  | 79.2055   | 32  | 2768.31  | 79.0742   |
| 33  | 2726.85  | 79.273    | 34  | 2660.32  | 80.1573   | 35  | 2536.9   | 76.9775   | 36  | 2422.15  | 76.2309   |
| 37  | 2354.66  | 73.1455   | 38  | 2309.34  | 73.1563   | 39  | 2250.52  | 73.3083   | 40  | 2227.38  | 69.5185   |
| 41  | 2175.31  | 75.8916   | 42  | 2143.49  | 73.102    | 43  | 2114.56  | 74.414    | 44  | 2022.96  | 71.7356   |
| 45  | 1977.64  | 71.2394   | 46  | 1958.36  | 71.0097   | 47  | 1886.04  | 74.0972   | 48  | 1859.04  | 73.5419   |
| 49  | 1786.72  | 73.4185   | 50  | 1728.87  | 70.7394   | 51  | 1672.95  | 49.4077   | 52  | 1644.02  | 56.2157   |
| 53  | 1589.06  | 59.7484   | 54  | 1520.6   | 53.1785   | 55  | 1500.35  | 51.9745   | 56  | 1478.17  | 62.4255   |
| 57  | 1462.74  | 63.5256   | 58  | 1446.35  | 60.4771   | 59  | 1405.85  | 59.5895   | 60  | 1380.78  | 63.1502   |
| 61  | 1321     | 61.9584   | 62  | 1249.65  | 62.3983   | 63  | 1210.11  | 65.402    | 64  | 1170.58  | 71.2338   |
| 65  | 1133.94  | 60.3787   | 66  | 1104.05  | 65.1168   | 67  | 1053.91  | 69.8816   | 68  | 1017.27  | 73.7799   |

[ Result of Peak Picking ]

| No. | Position | Intensity |
|-----|----------|-----------|
| 69  | 970.019  | 72.2312   |
| 73  | 818.634  | 72.1225   |
| 77  | 698.105  | 65.3448   |
| 81  | 468.617  | 75.861    |

| No. | Position | Intensity |
|-----|----------|-----------|
| 70  | 917.95   | 66.9467   |
| 74  | 797.421  | 68.8782   |
| 78  | 673.035  | 62.8721   |
| 82  | 443.547  | 74.6276   |

| No. | Position | Intensity |
|-----|----------|-----------|
| 71  | 886.131  | 69.3421   |
| 75  | 781.993  | 67.491    |
| 79  | 583.361  | 69.1268   |
| 83  | 425.227  | 74.4485   |

| No. | Position | Intensity |
|-----|----------|-----------|
| 72  | 848.525  | 65.1434   |
| 76  | 760.78   | 69.6227   |
| 80  | 502.366  | 73.7165   |
| 84  | 406.907  | 74.2537   |

# <sup>1</sup>H NMR of 12k

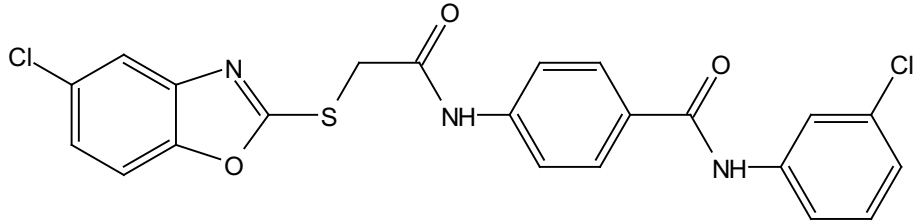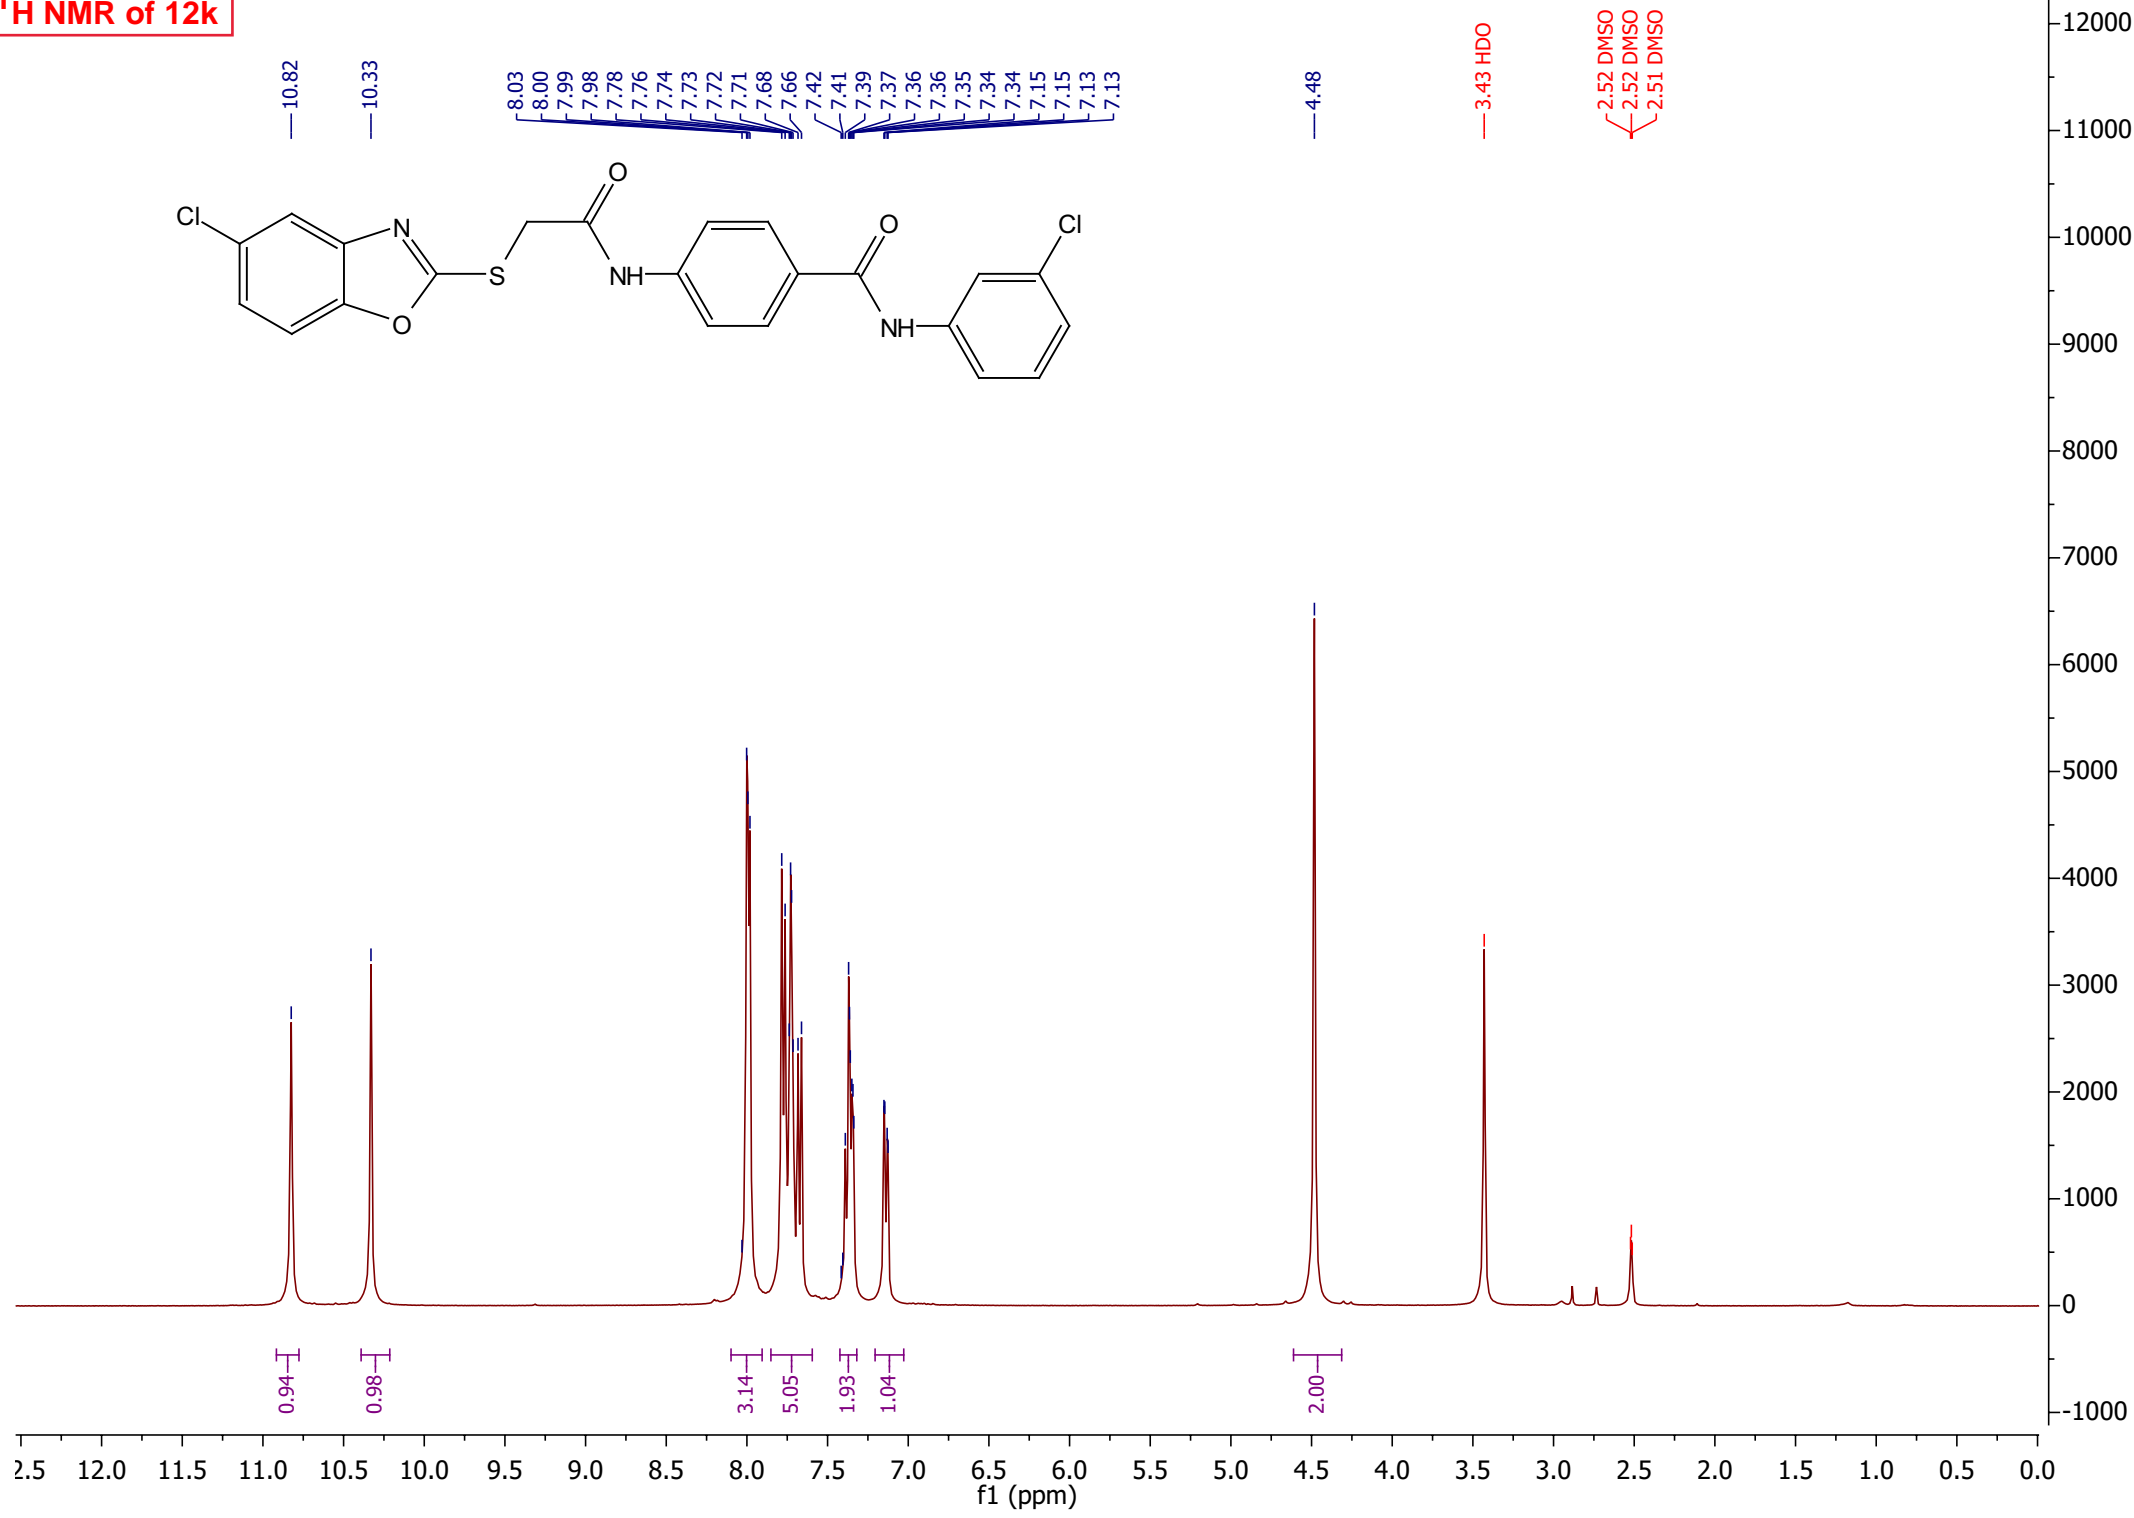

**<sup>1</sup>H NMR of 12k**

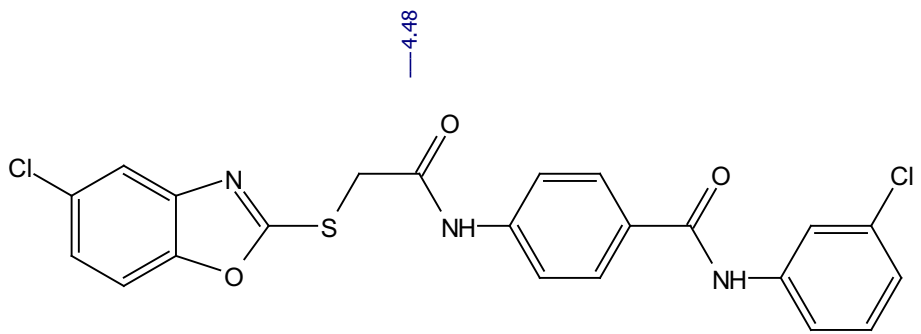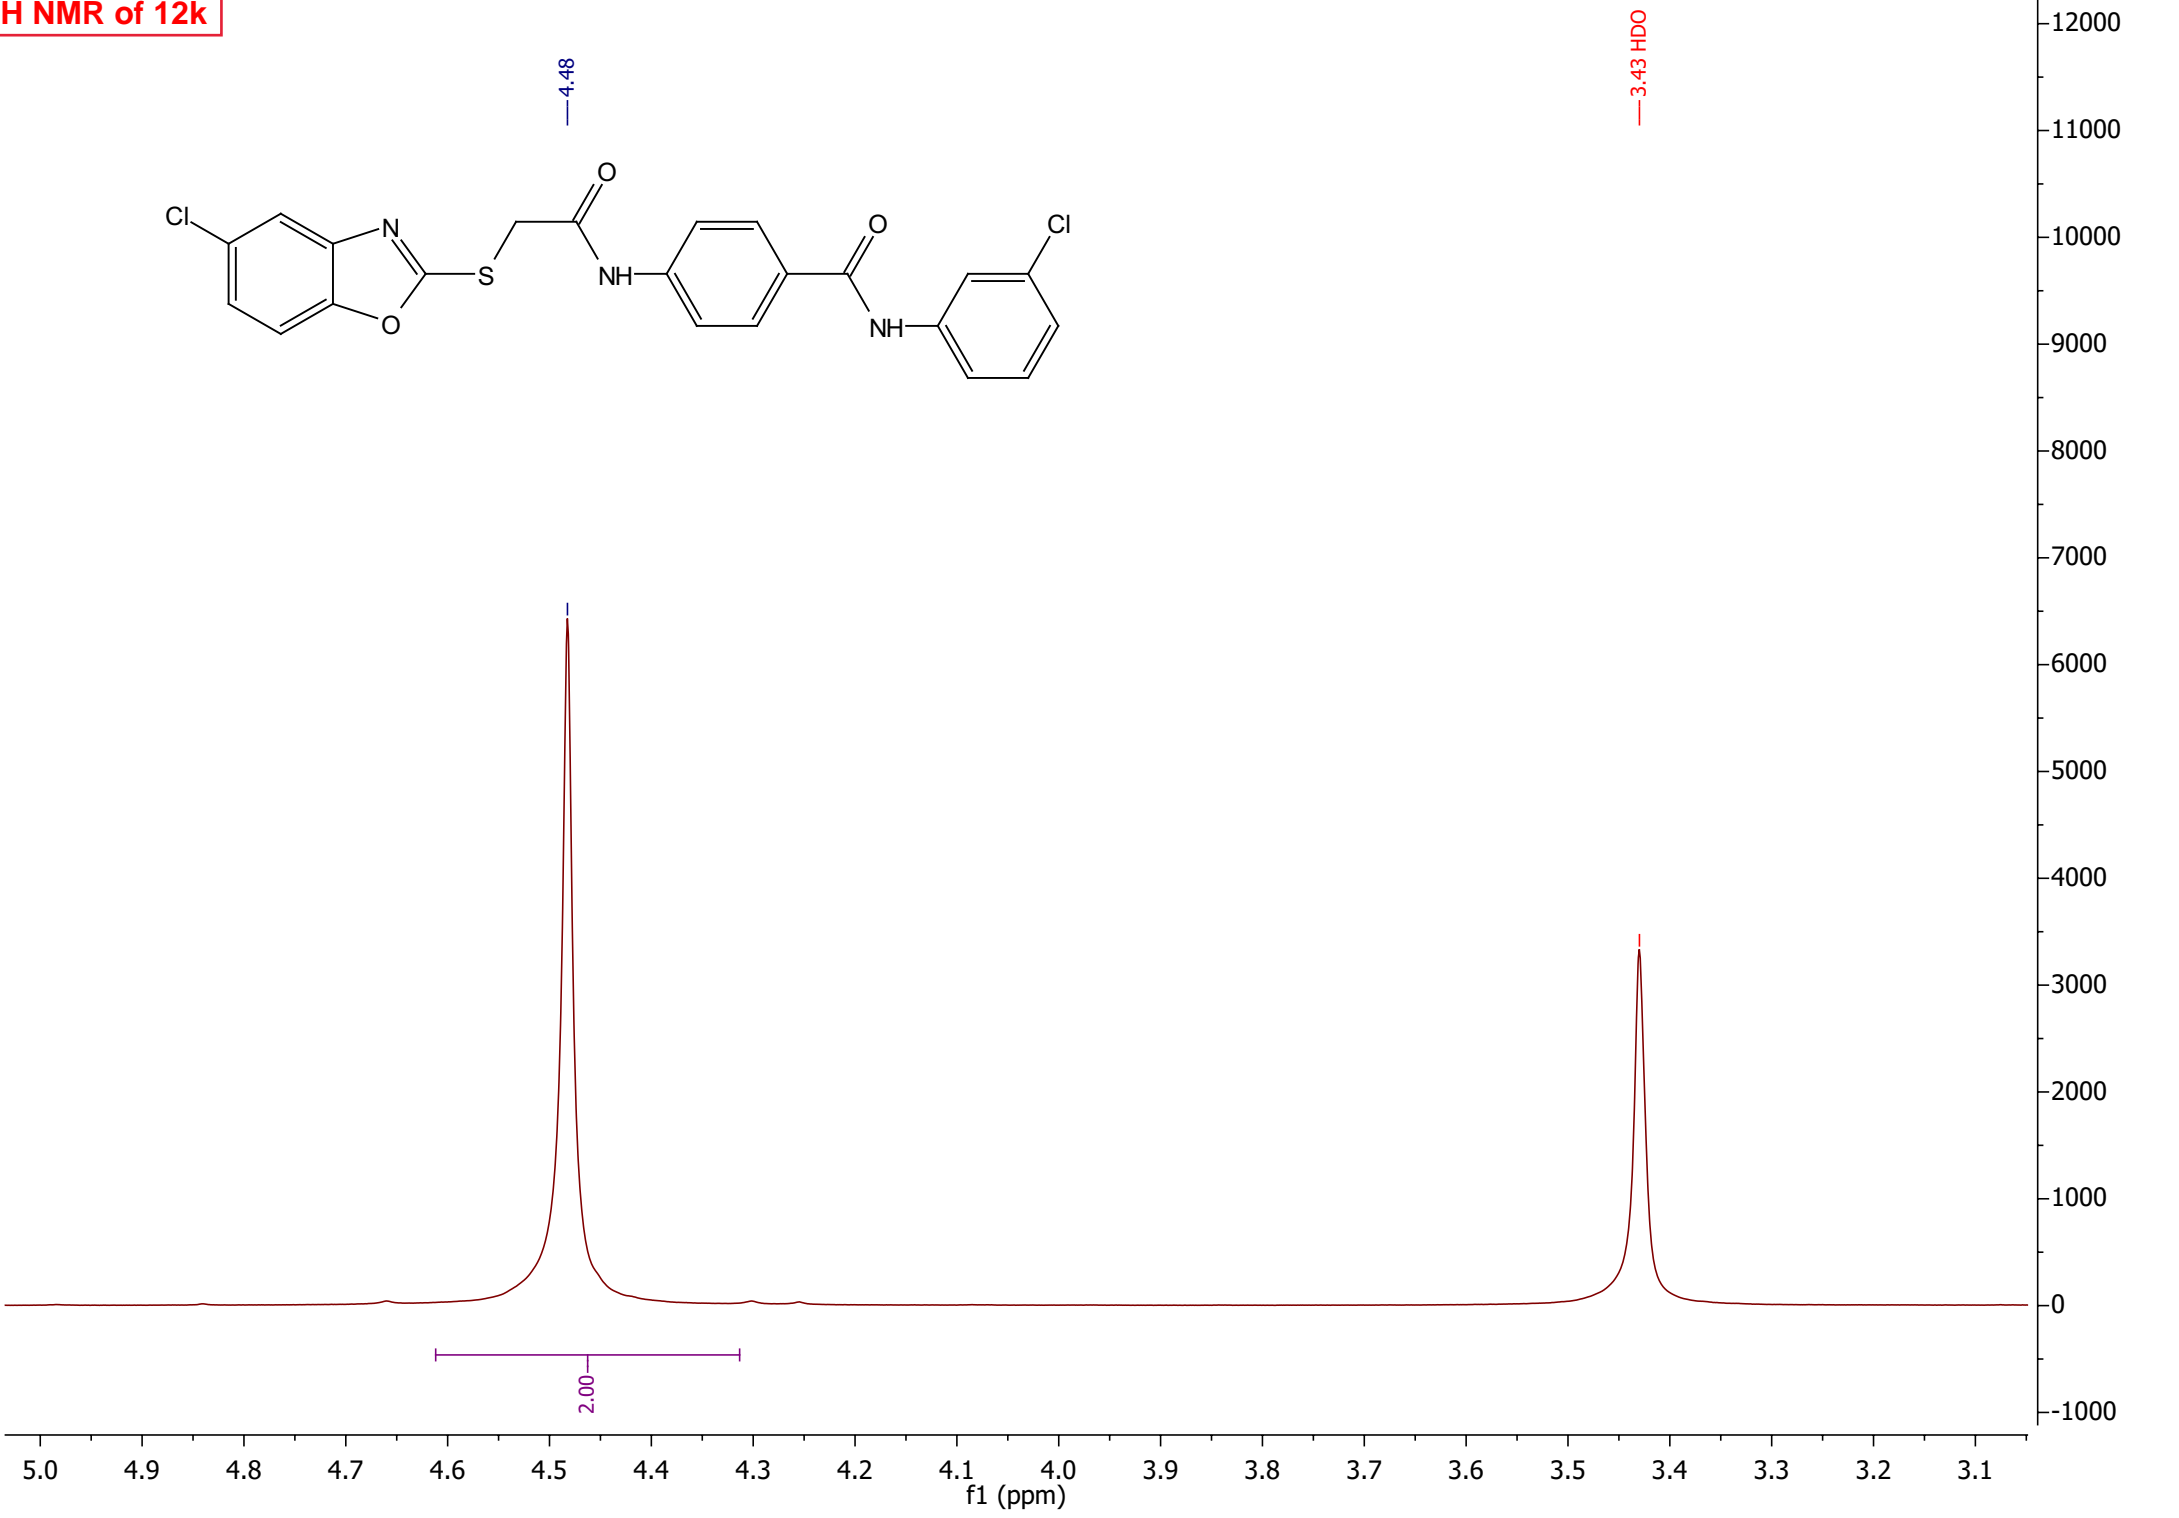

<sup>1</sup>H NMR CBA6

10.82

10.33

<sup>1</sup>H NMR of 12k



8.03  
8.00  
7.99  
7.98  
7.78  
7.76  
7.74  
7.73  
7.72  
7.71  
7.68  
7.66  
7.42  
7.41  
7.39  
7.37  
7.36  
7.36  
7.35  
7.34  
7.34  
7.15  
7.15  
7.13  
7.13

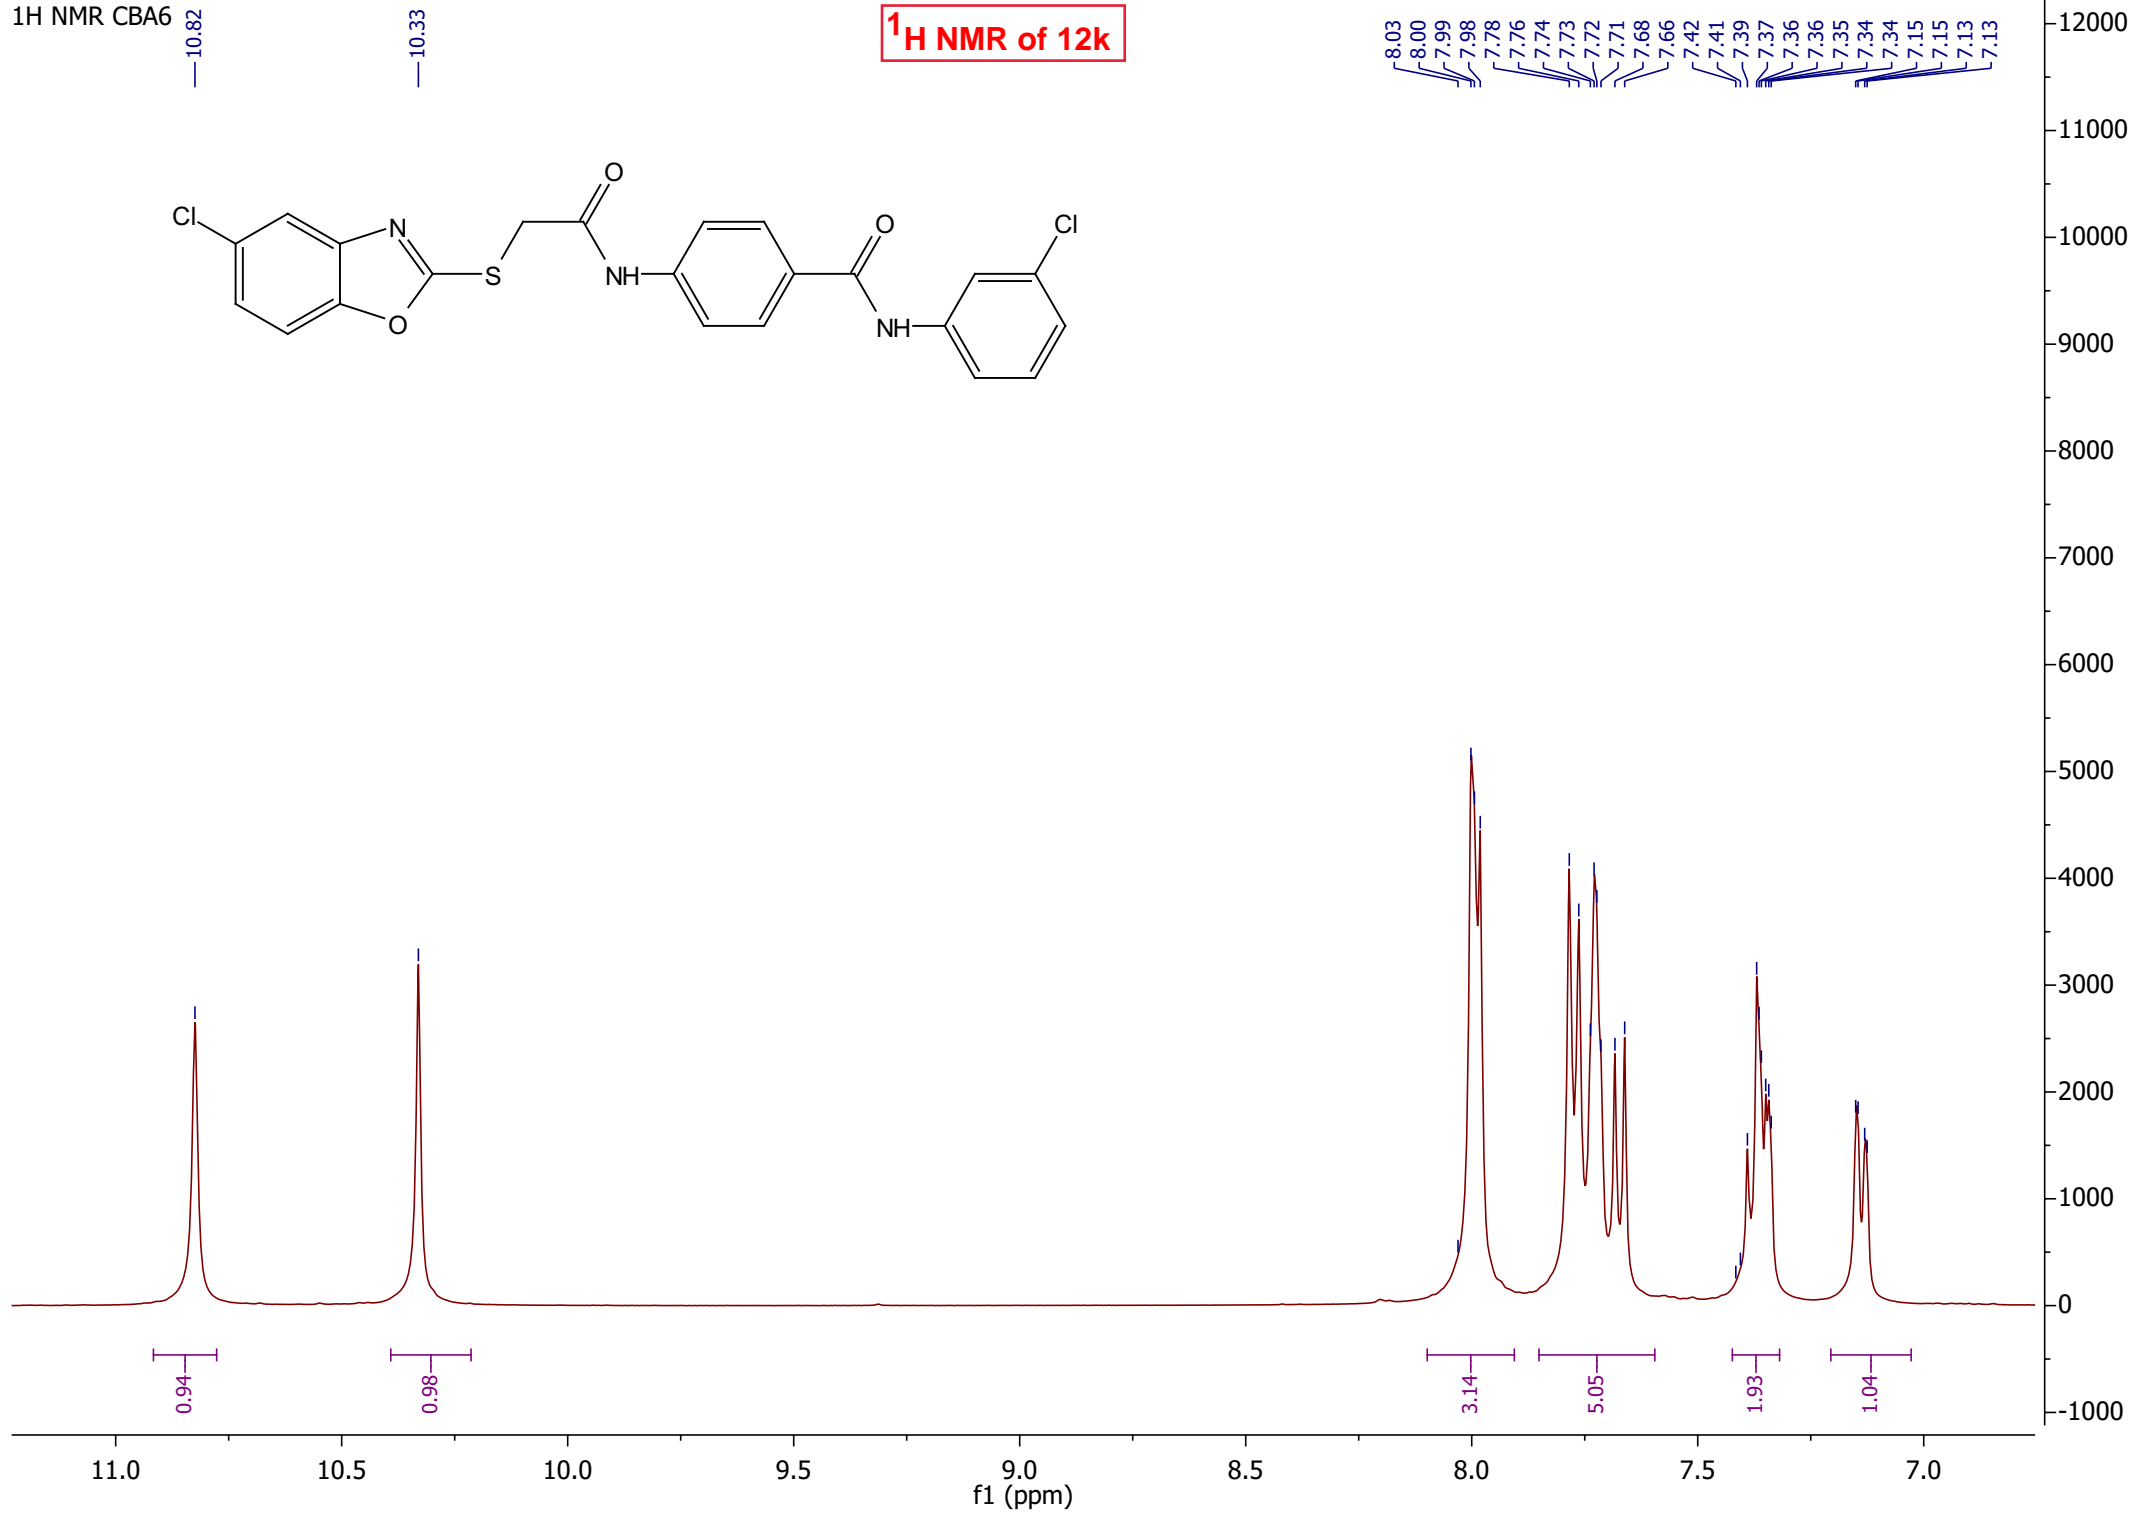

**<sup>13</sup>C NMR of 12k**



166.39  
165.79  
165.52

150.61

142.96  
142.31  
141.24

133.41  
130.70  
129.34

124.73

120.15  
118.91  
118.49

111.94

40.61 DMSO  
40.40 DMSO  
40.19 DMSO  
39.98 DMSO  
39.78 DMSO  
39.57 DMSO  
39.36 DMSO  
37.46

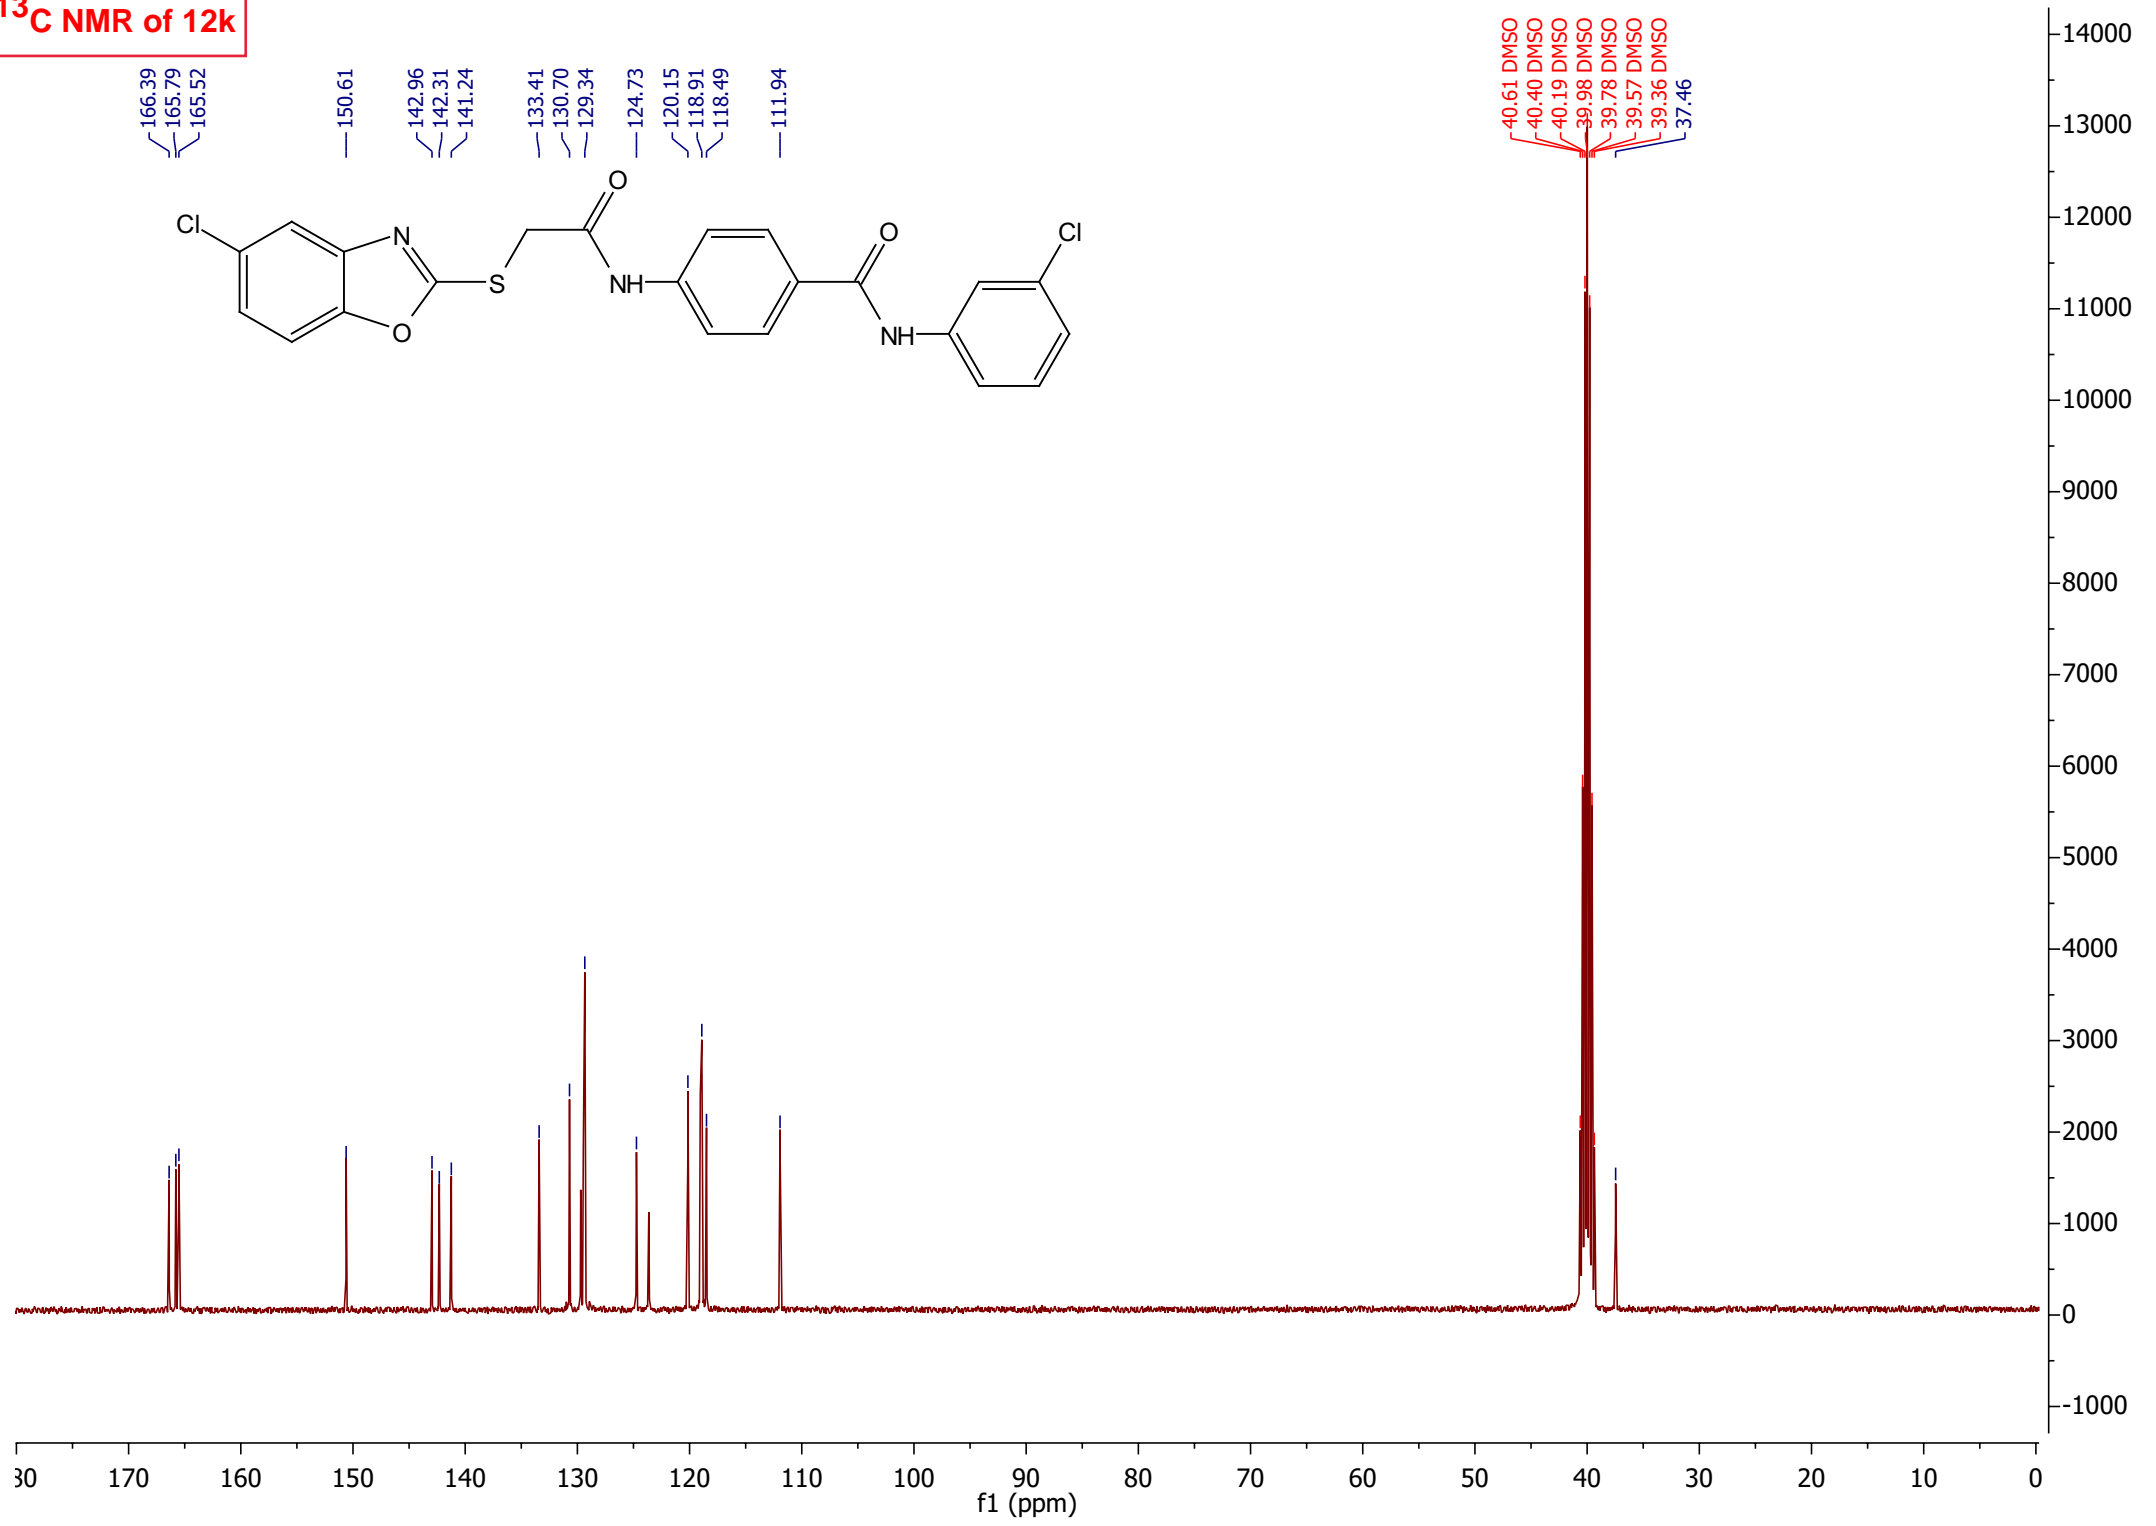

**<sup>13</sup>C NMR of 12k**

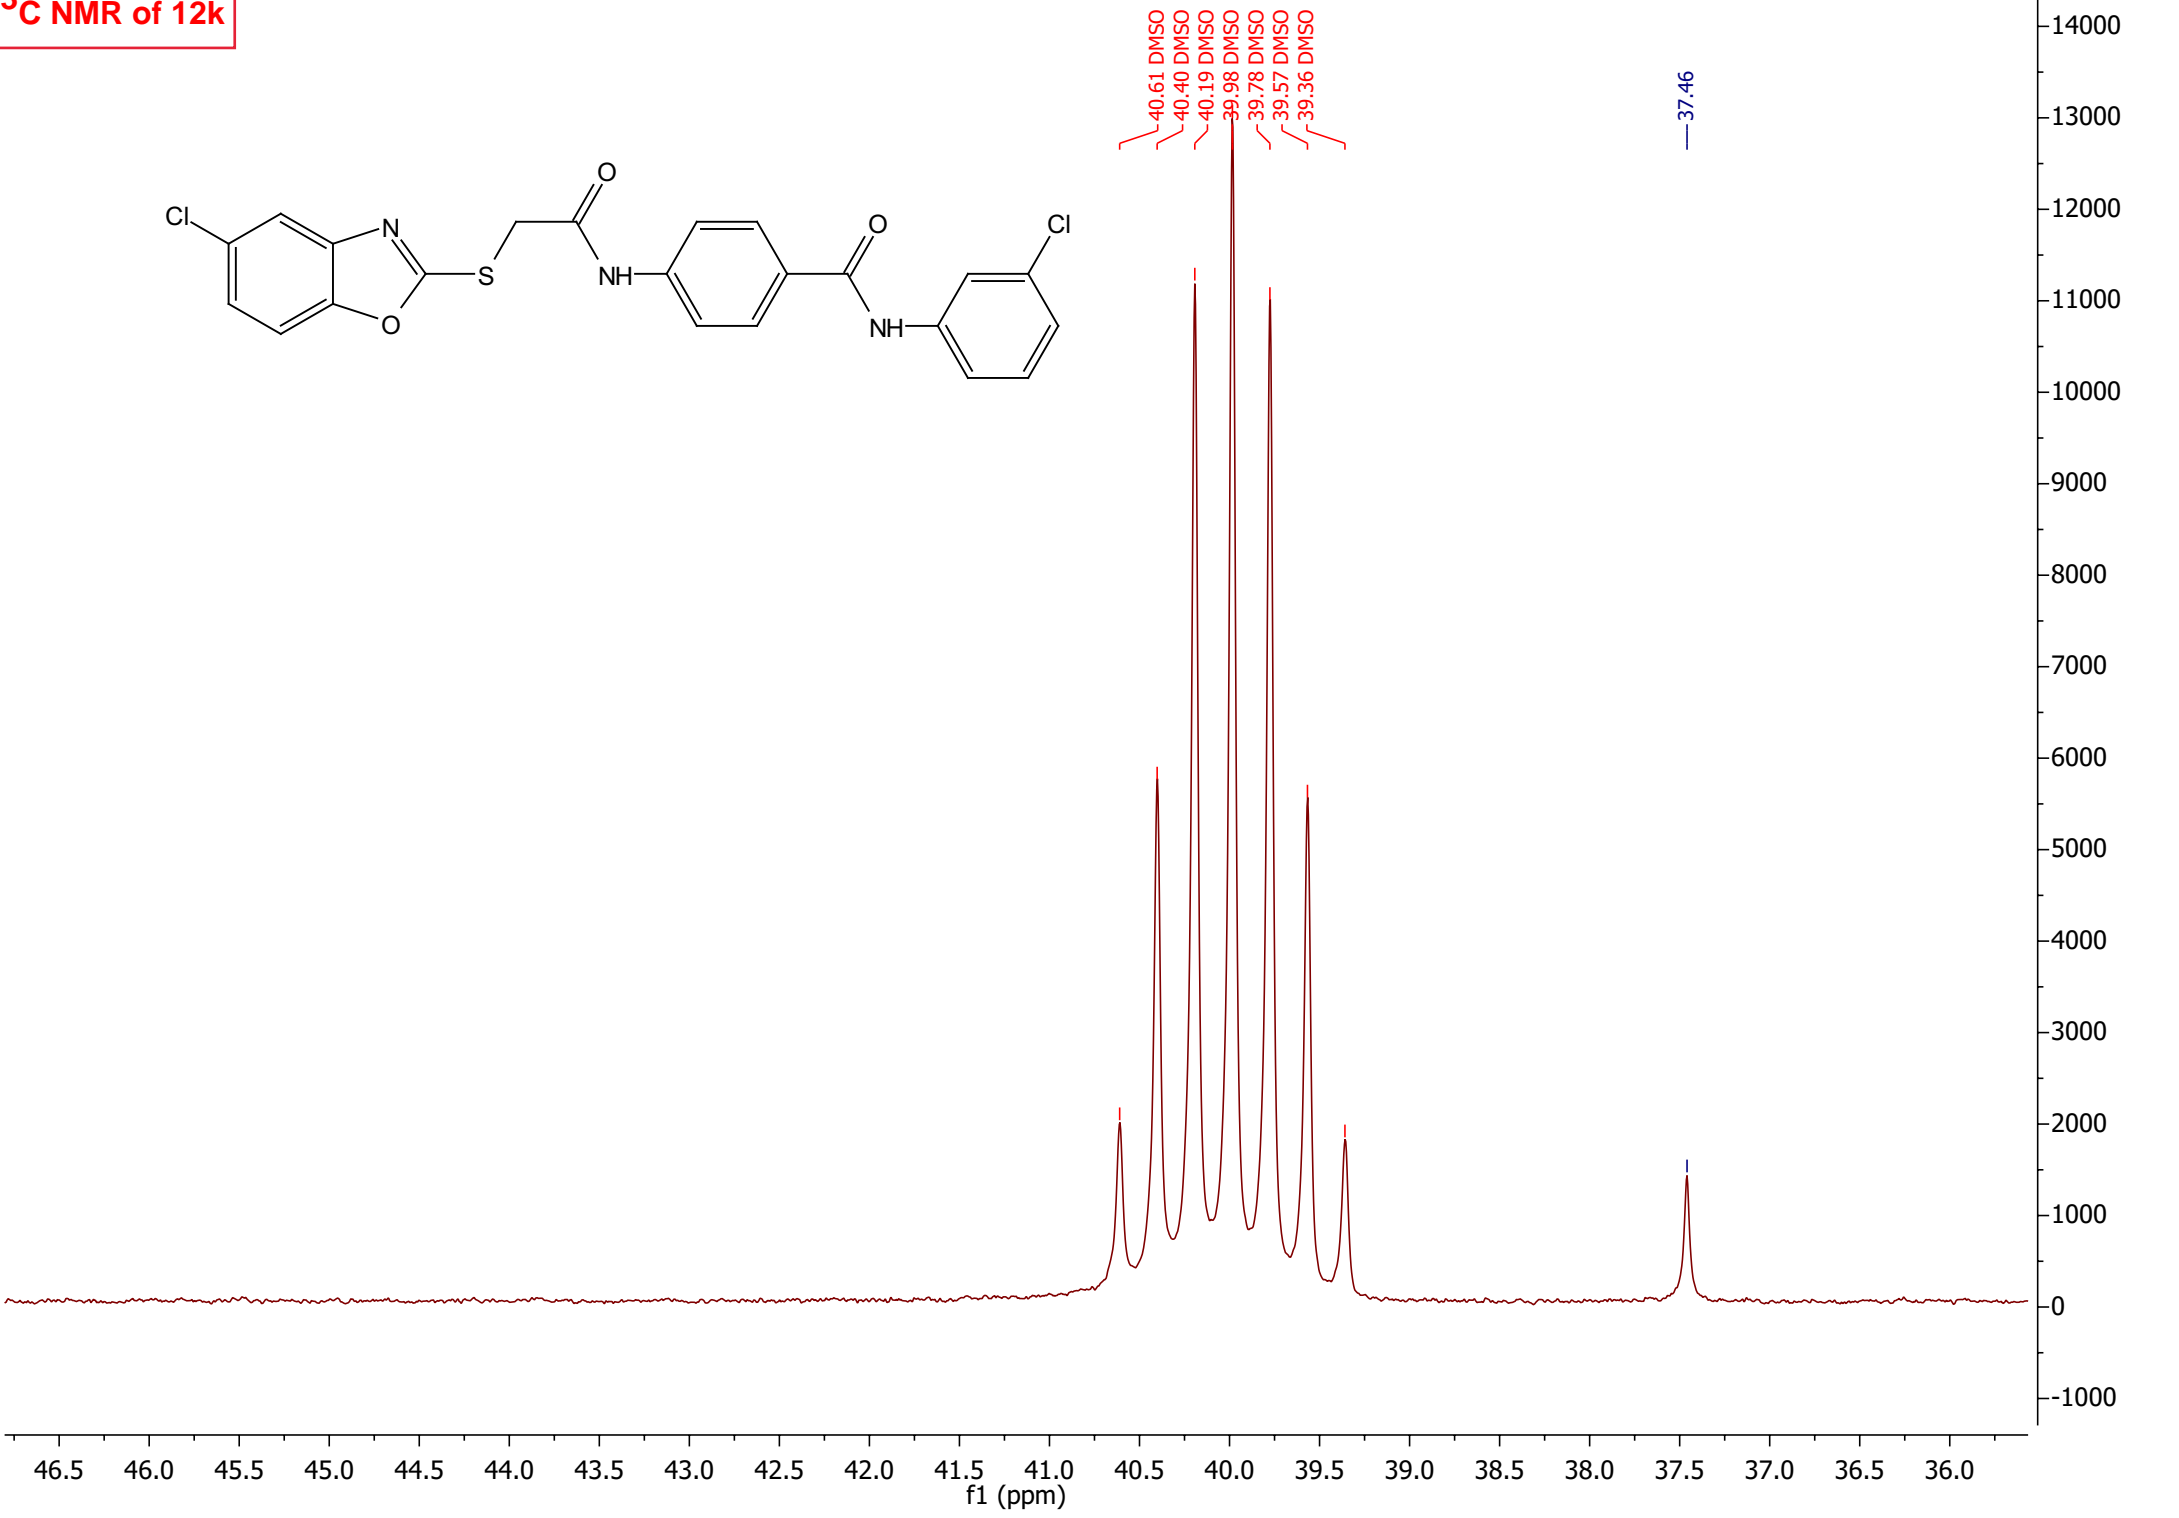

**<sup>13</sup>C NMR of 12k**



166.39  
165.79  
165.52

150.61

142.96  
142.31  
141.24

133.41

130.70  
129.34

124.73

120.15  
118.91  
118.49

111.94

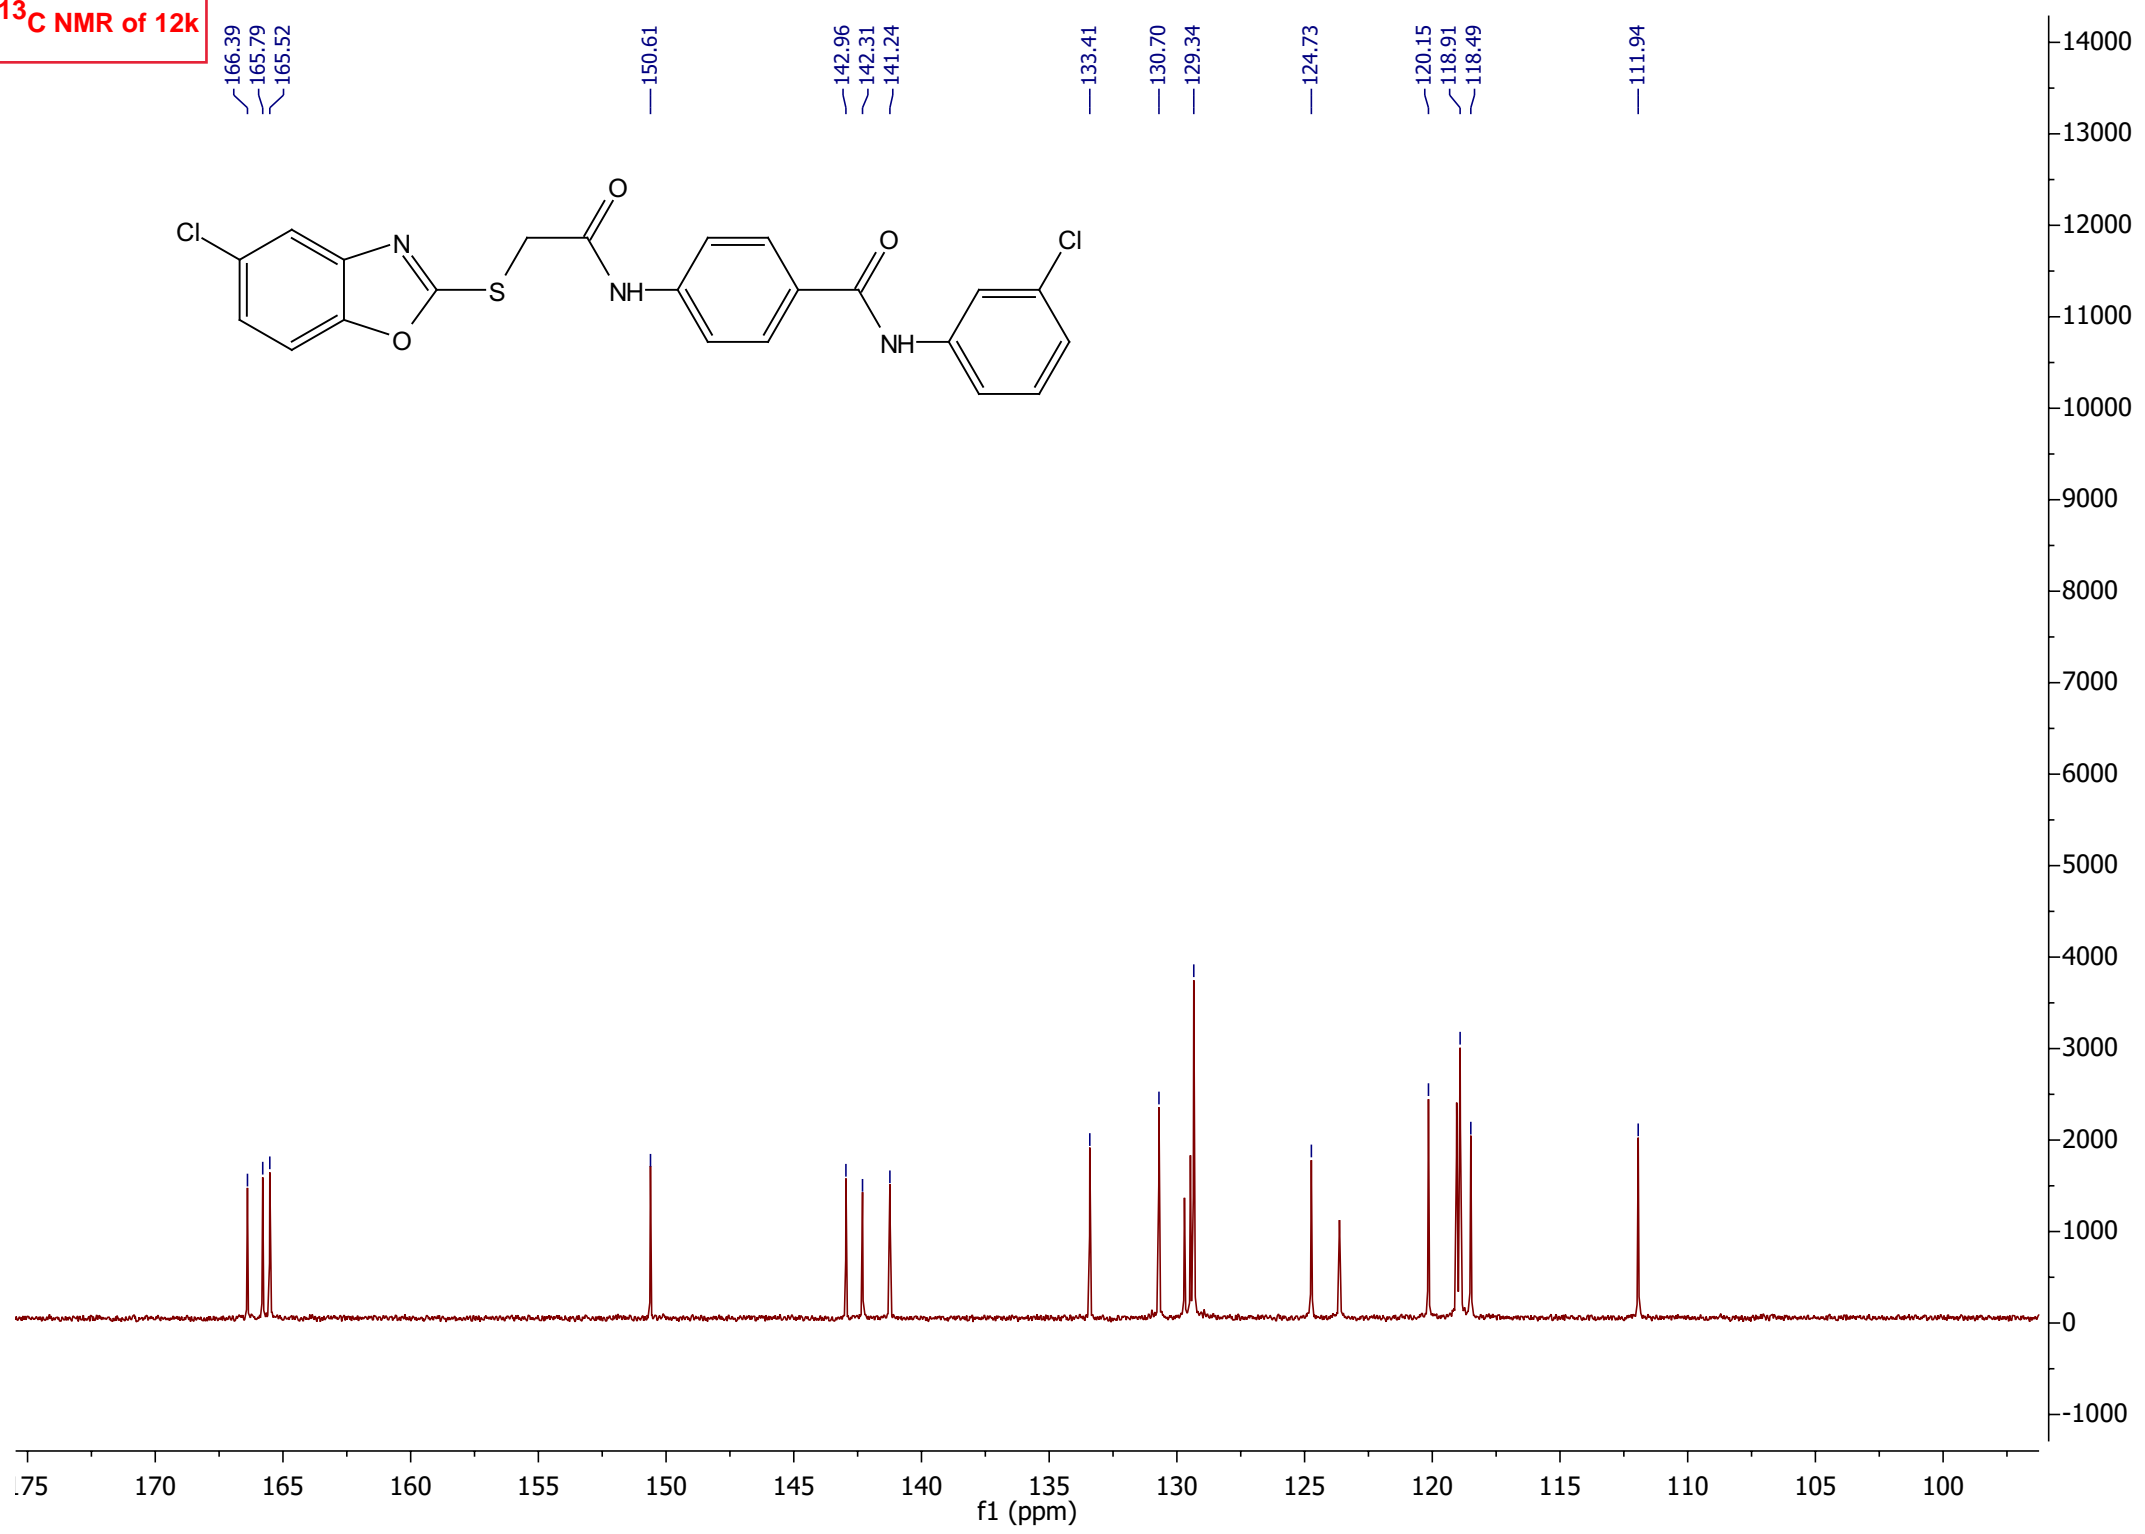



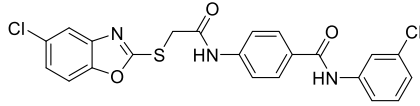

Mass spec. of 12k

RT: 0.00 - 4.22 SM: 7G

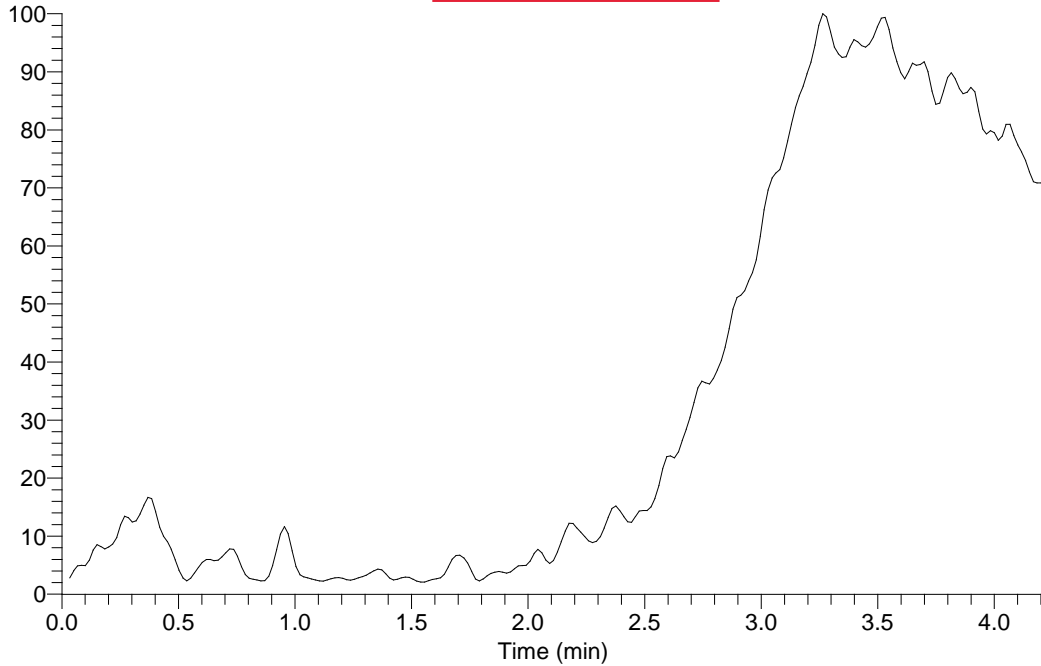

Hazem-Abdelhady-CBA6 #224 RT: 3.77 AV: 1 NL: 2.26E4  
T: + c EI Full ms [40.00-1000.00]

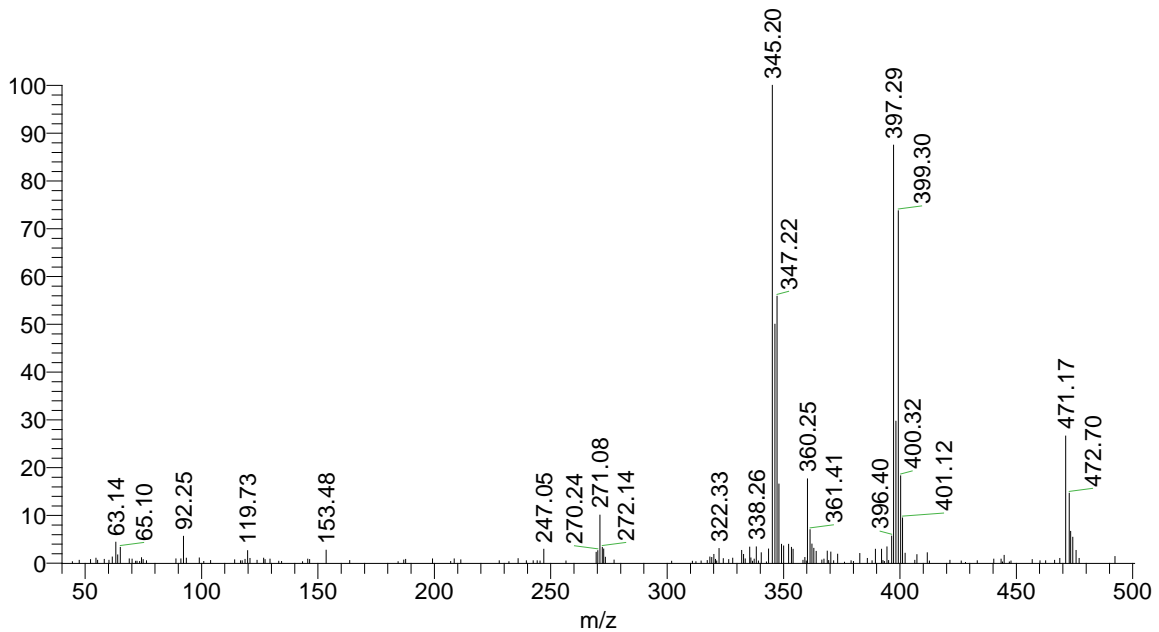

# IR Of Comp. 12I

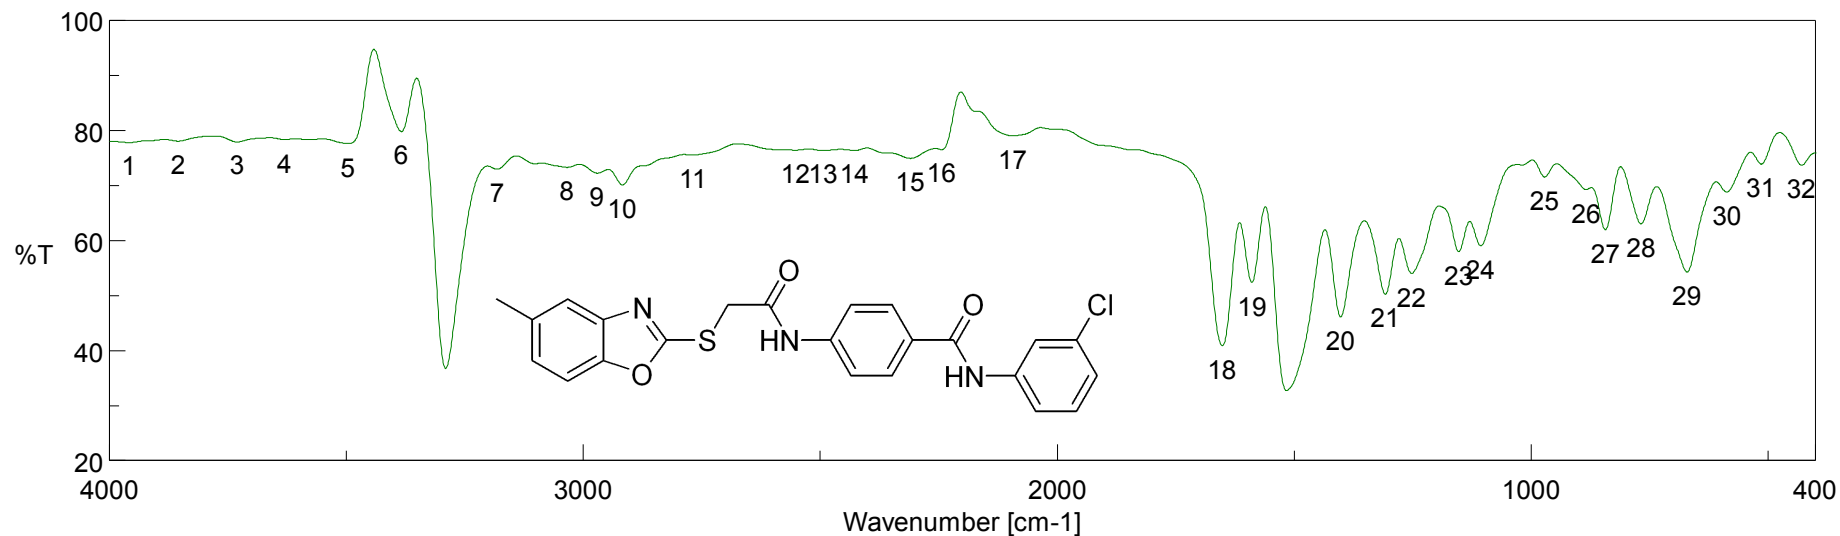

### [ Result of Peak Picking ]

| No. | Position | Intensity | No. | Position | Intensity | No. | Position | Intensity | No. | Position | Intensity |
|-----|----------|-----------|-----|----------|-----------|-----|----------|-----------|-----|----------|-----------|
| 1   | 3958.18  | 77.7682   | 2   | 3855.01  | 78.0284   | 3   | 3730.62  | 77.8773   | 4   | 3630.34  | 78.3132   |
| 5   | 3496.31  | 77.6183   | 6   | 3384.46  | 79.7644   | 7   | 3181.97  | 72.9196   | 8   | 3034.44  | 73.2628   |
| 9   | 2970.8   | 72.2057   | 10  | 2917.77  | 70.0713   | 11  | 2768.31  | 75.4914   | 12  | 2552.33  | 76.3884   |
| 13  | 2493.51  | 76.2938   | 14  | 2427.94  | 76.3189   | 15  | 2310.3   | 74.8923   | 16  | 2243.77  | 76.4835   |
| 17  | 2094.32  | 79        | 18  | 1651.73  | 40.8537   | 19  | 1589.06  | 52.3312   | 20  | 1402     | 46.0928   |
| 21  | 1307.5   | 50.2137   | 22  | 1251.58  | 53.9942   | 23  | 1152.26  | 57.9257   | 24  | 1105.98  | 59.0099   |
| 25  | 970.983  | 71.5076   | 26  | 883.238  | 69.2085   | 27  | 842.74   | 61.9167   | 28  | 767.53   | 63.0025   |
| 29  | 671.106  | 54.239    | 30  | 586.254  | 68.7772   | 31  | 513.936  | 73.8434   | 32  | 429.084  | 73.6242   |

**<sup>1</sup>H NMR of 12I**

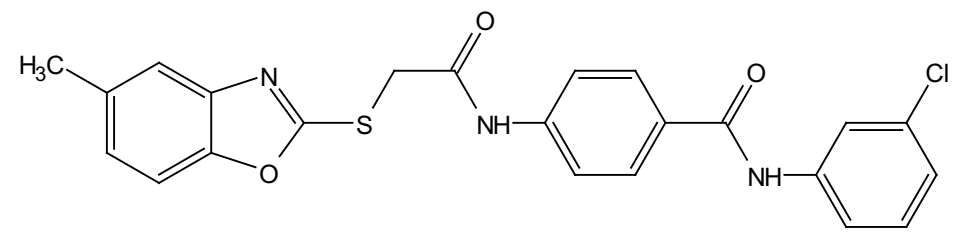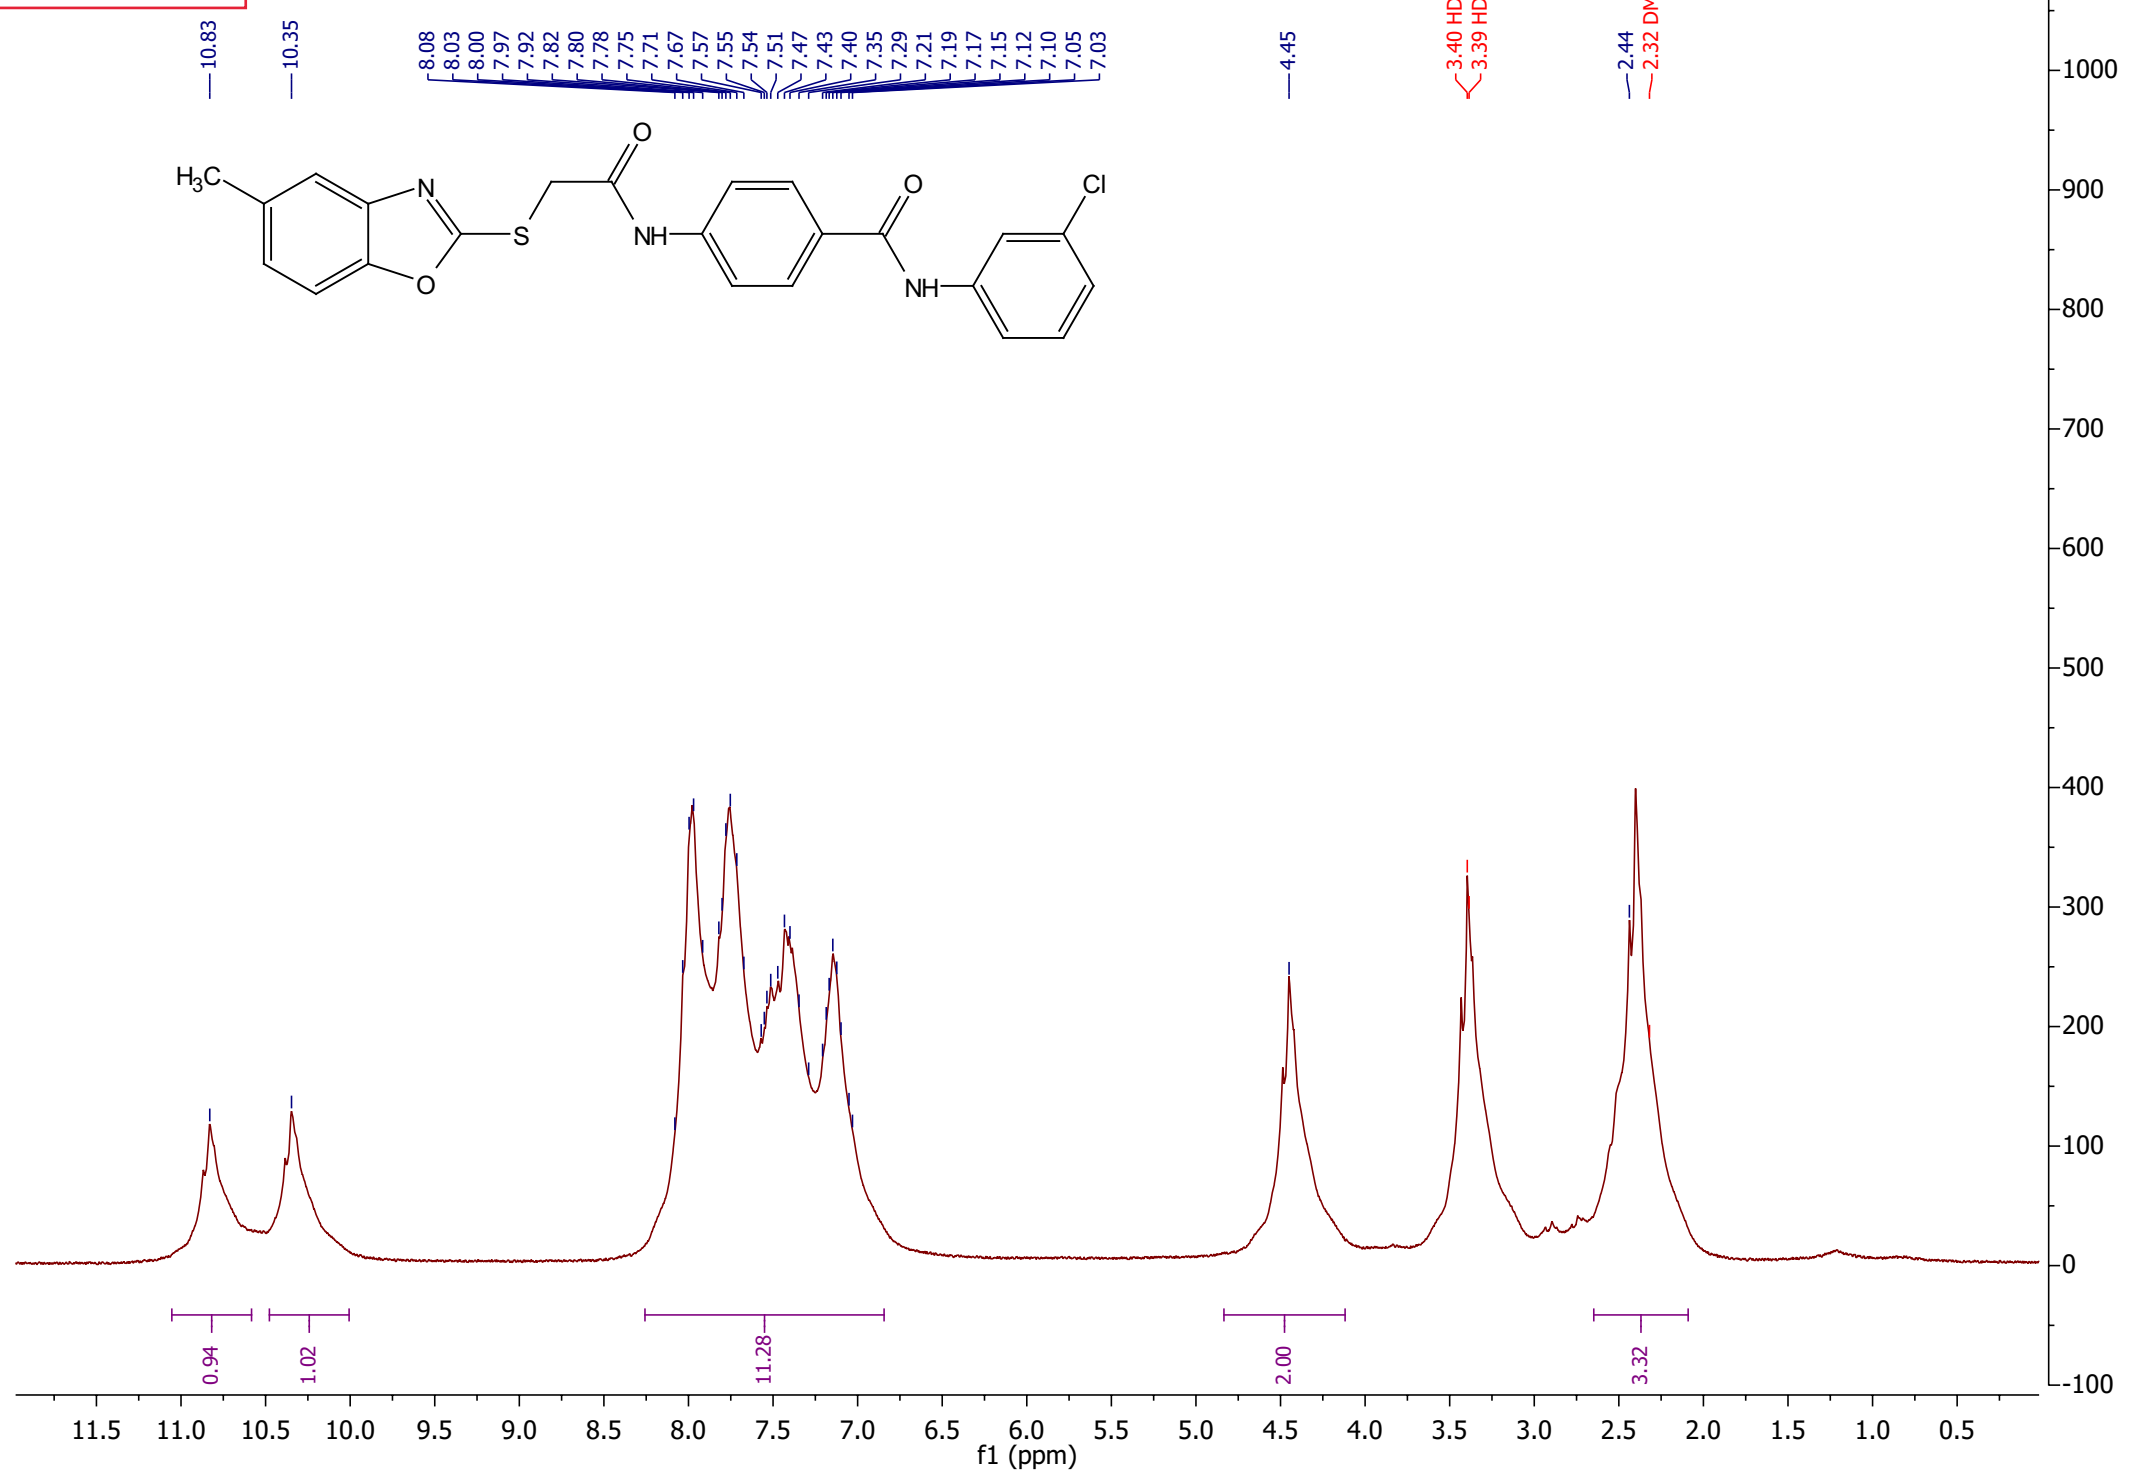

**<sup>1</sup>H NMR of 12I**



**<sup>1</sup>H NMR of 12I**



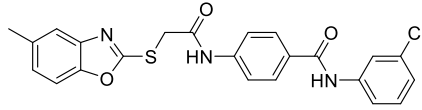

Mass spec. of 12I

RT: 0.00 - 3.68 SM: 7G

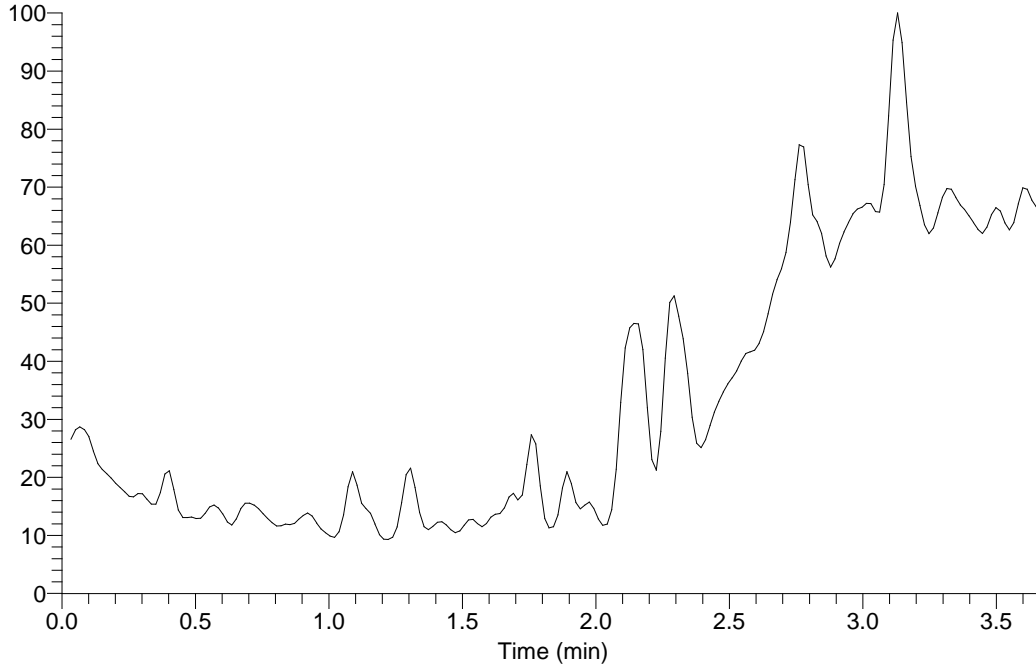

NL:  
7.48E4  
TIC MS  
Hazem-  
Abdelhady-  
MBA6

Hazem-Abdelhady-MBA6 #213 RT: 3.58 AV: 1 NL: 9.19E3  
T: + c EI Full ms [40.00-1000.00]

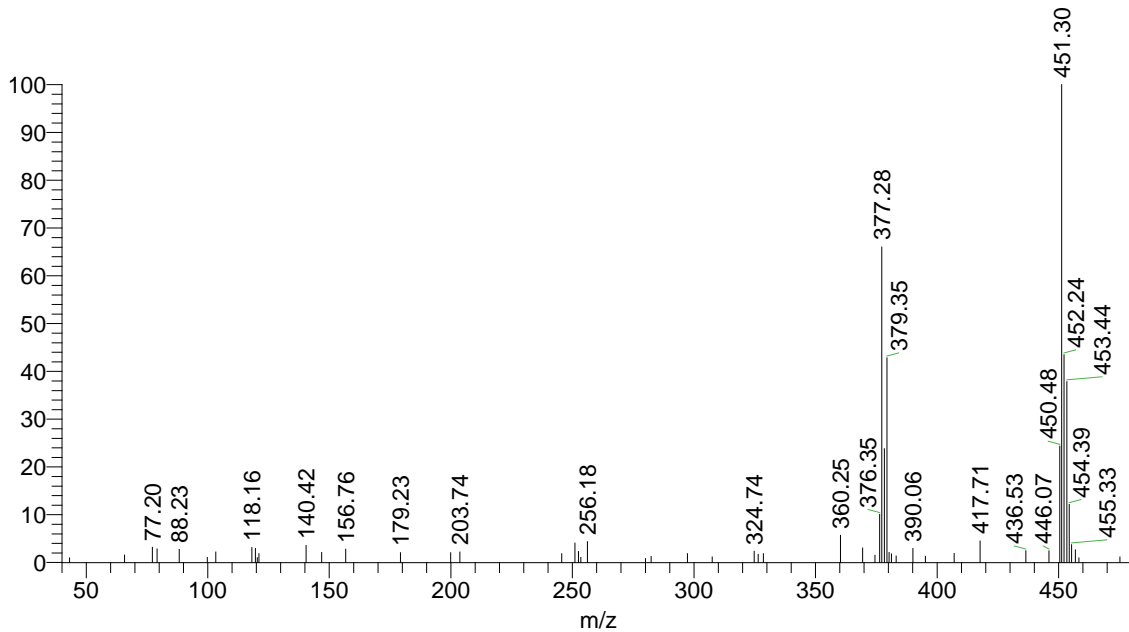

# IR Of Comp. 13a

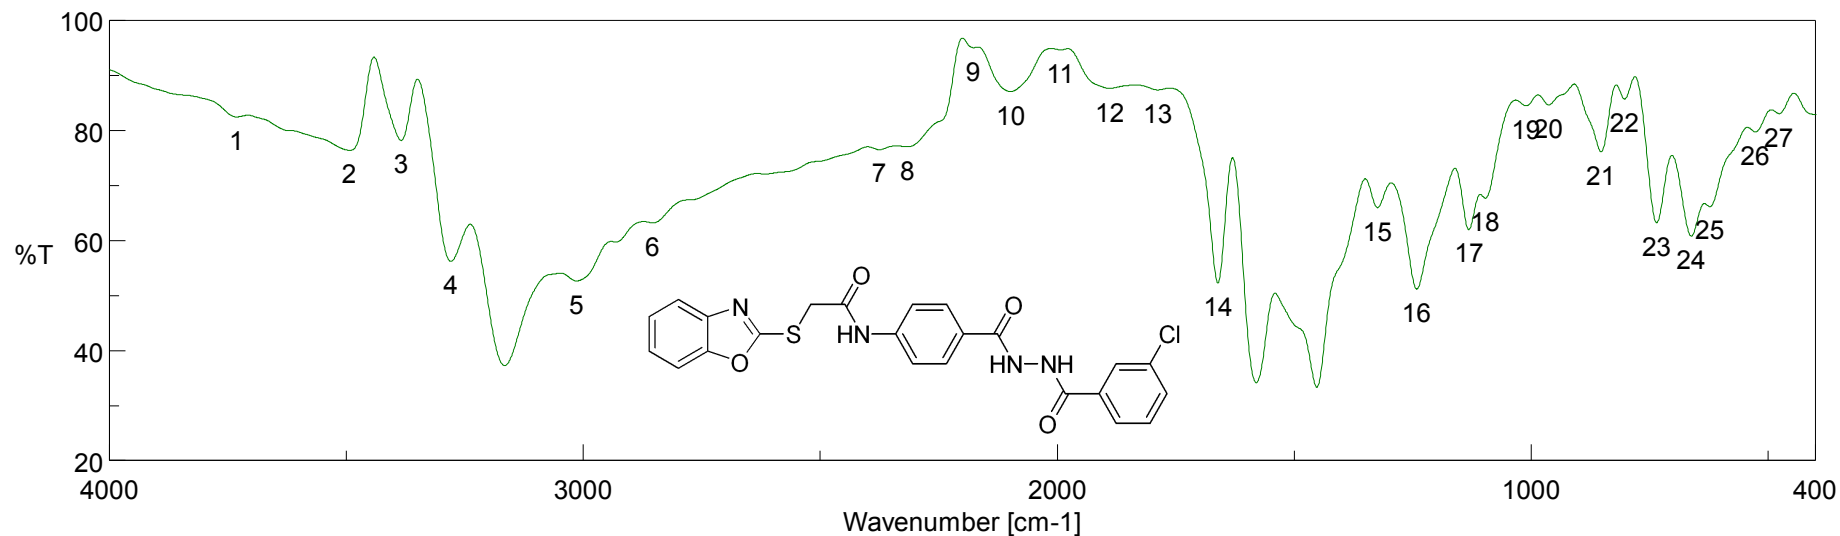

## [ Result of Peak Picking ]

| No. | Position | Intensity | No. | Position | Intensity | No. | Position | Intensity | No. | Position | Intensity |
|-----|----------|-----------|-----|----------|-----------|-----|----------|-----------|-----|----------|-----------|
| 1   | 3731.58  | 82.4289   | 2   | 3493.42  | 76.3569   | 3   | 3384.46  | 78.15     | 4   | 3279.36  | 56.1766   |
| 5   | 3014.19  | 52.6266   | 6   | 2853.17  | 63.1626   | 7   | 2374.91  | 76.4734   | 8   | 2315.12  | 77.024    |
| 9   | 2176.27  | 95.0101   | 10  | 2098.17  | 87.0362   | 11  | 1992.11  | 94.6323   | 12  | 1888.93  | 87.6181   |
| 13  | 1787.69  | 87.3307   | 14  | 1660.41  | 52.2607   | 15  | 1323.89  | 65.9342   | 16  | 1240.97  | 51.1355   |
| 17  | 1131.05  | 61.9383   | 18  | 1096.33  | 67.6558   | 19  | 1010.52  | 84.4586   | 20  | 963.269  | 84.6237   |
| 21  | 852.382  | 76.1033   | 22  | 802.242  | 85.6725   | 23  | 734.746  | 63.1955   | 24  | 661.464  | 60.7727   |
| 25  | 621.931  | 66.1394   | 26  | 526.471  | 79.7055   | 27  | 476.331  | 83.0287   |     |          |           |

**<sup>1</sup>H NMR of 13a**

10.79  
10.65  
10.53  
10.43

7.98  
7.96  
7.94  
7.92  
7.90  
7.78  
7.75  
7.70  
7.68  
7.65  
7.63  
7.60  
7.58  
7.56  
7.37  
7.35  
7.34  
7.33  
7.31

4.47

3.43 H<sub>2</sub>O

2.52 DMSO

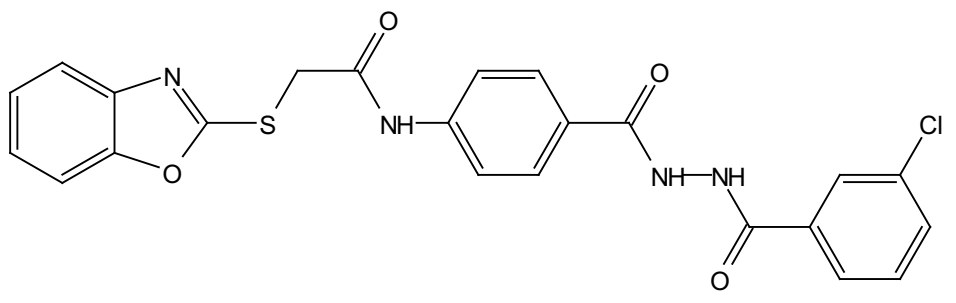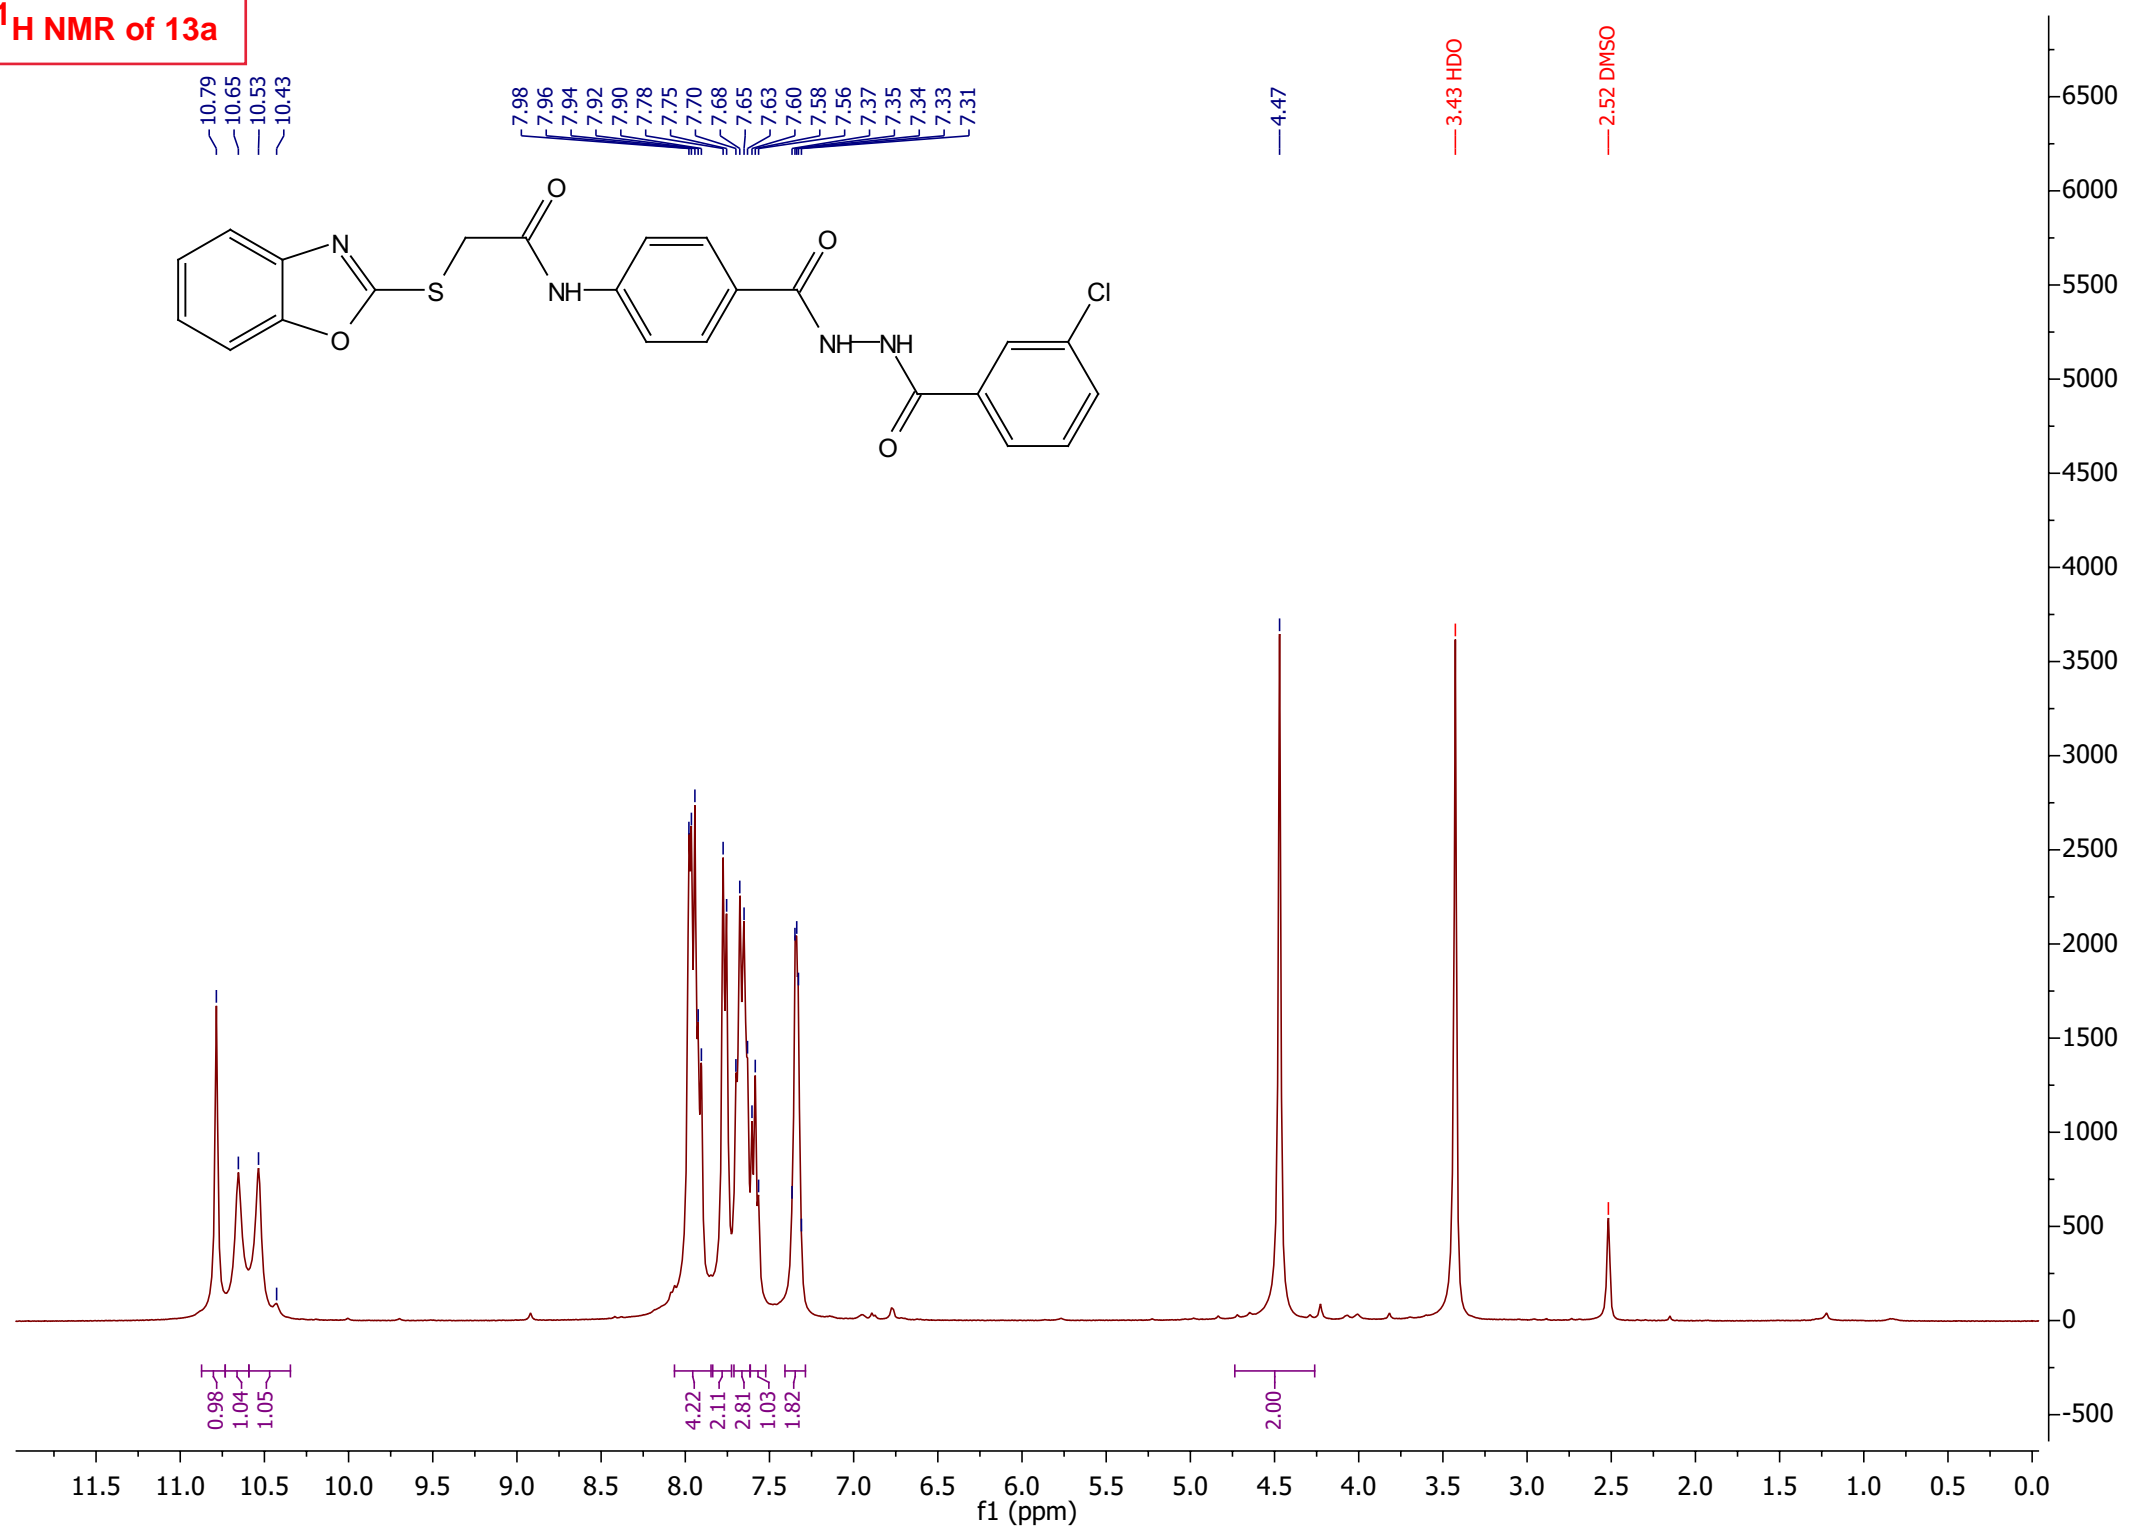



**<sup>1</sup>H NMR of 13a**

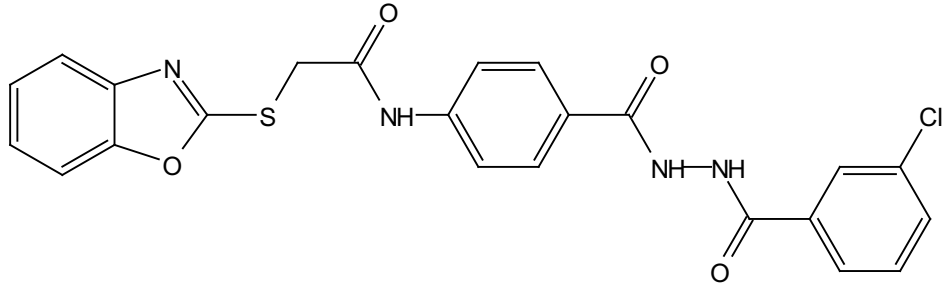

7.98  
7.96  
7.94  
7.92  
7.90  
7.78  
7.75  
7.70  
7.68  
7.65  
7.63  
7.60  
7.58  
7.56  
7.37  
7.35  
7.34  
7.33  
7.31

4.47

3.43 H<sub>2</sub>O

2.52 DMSO

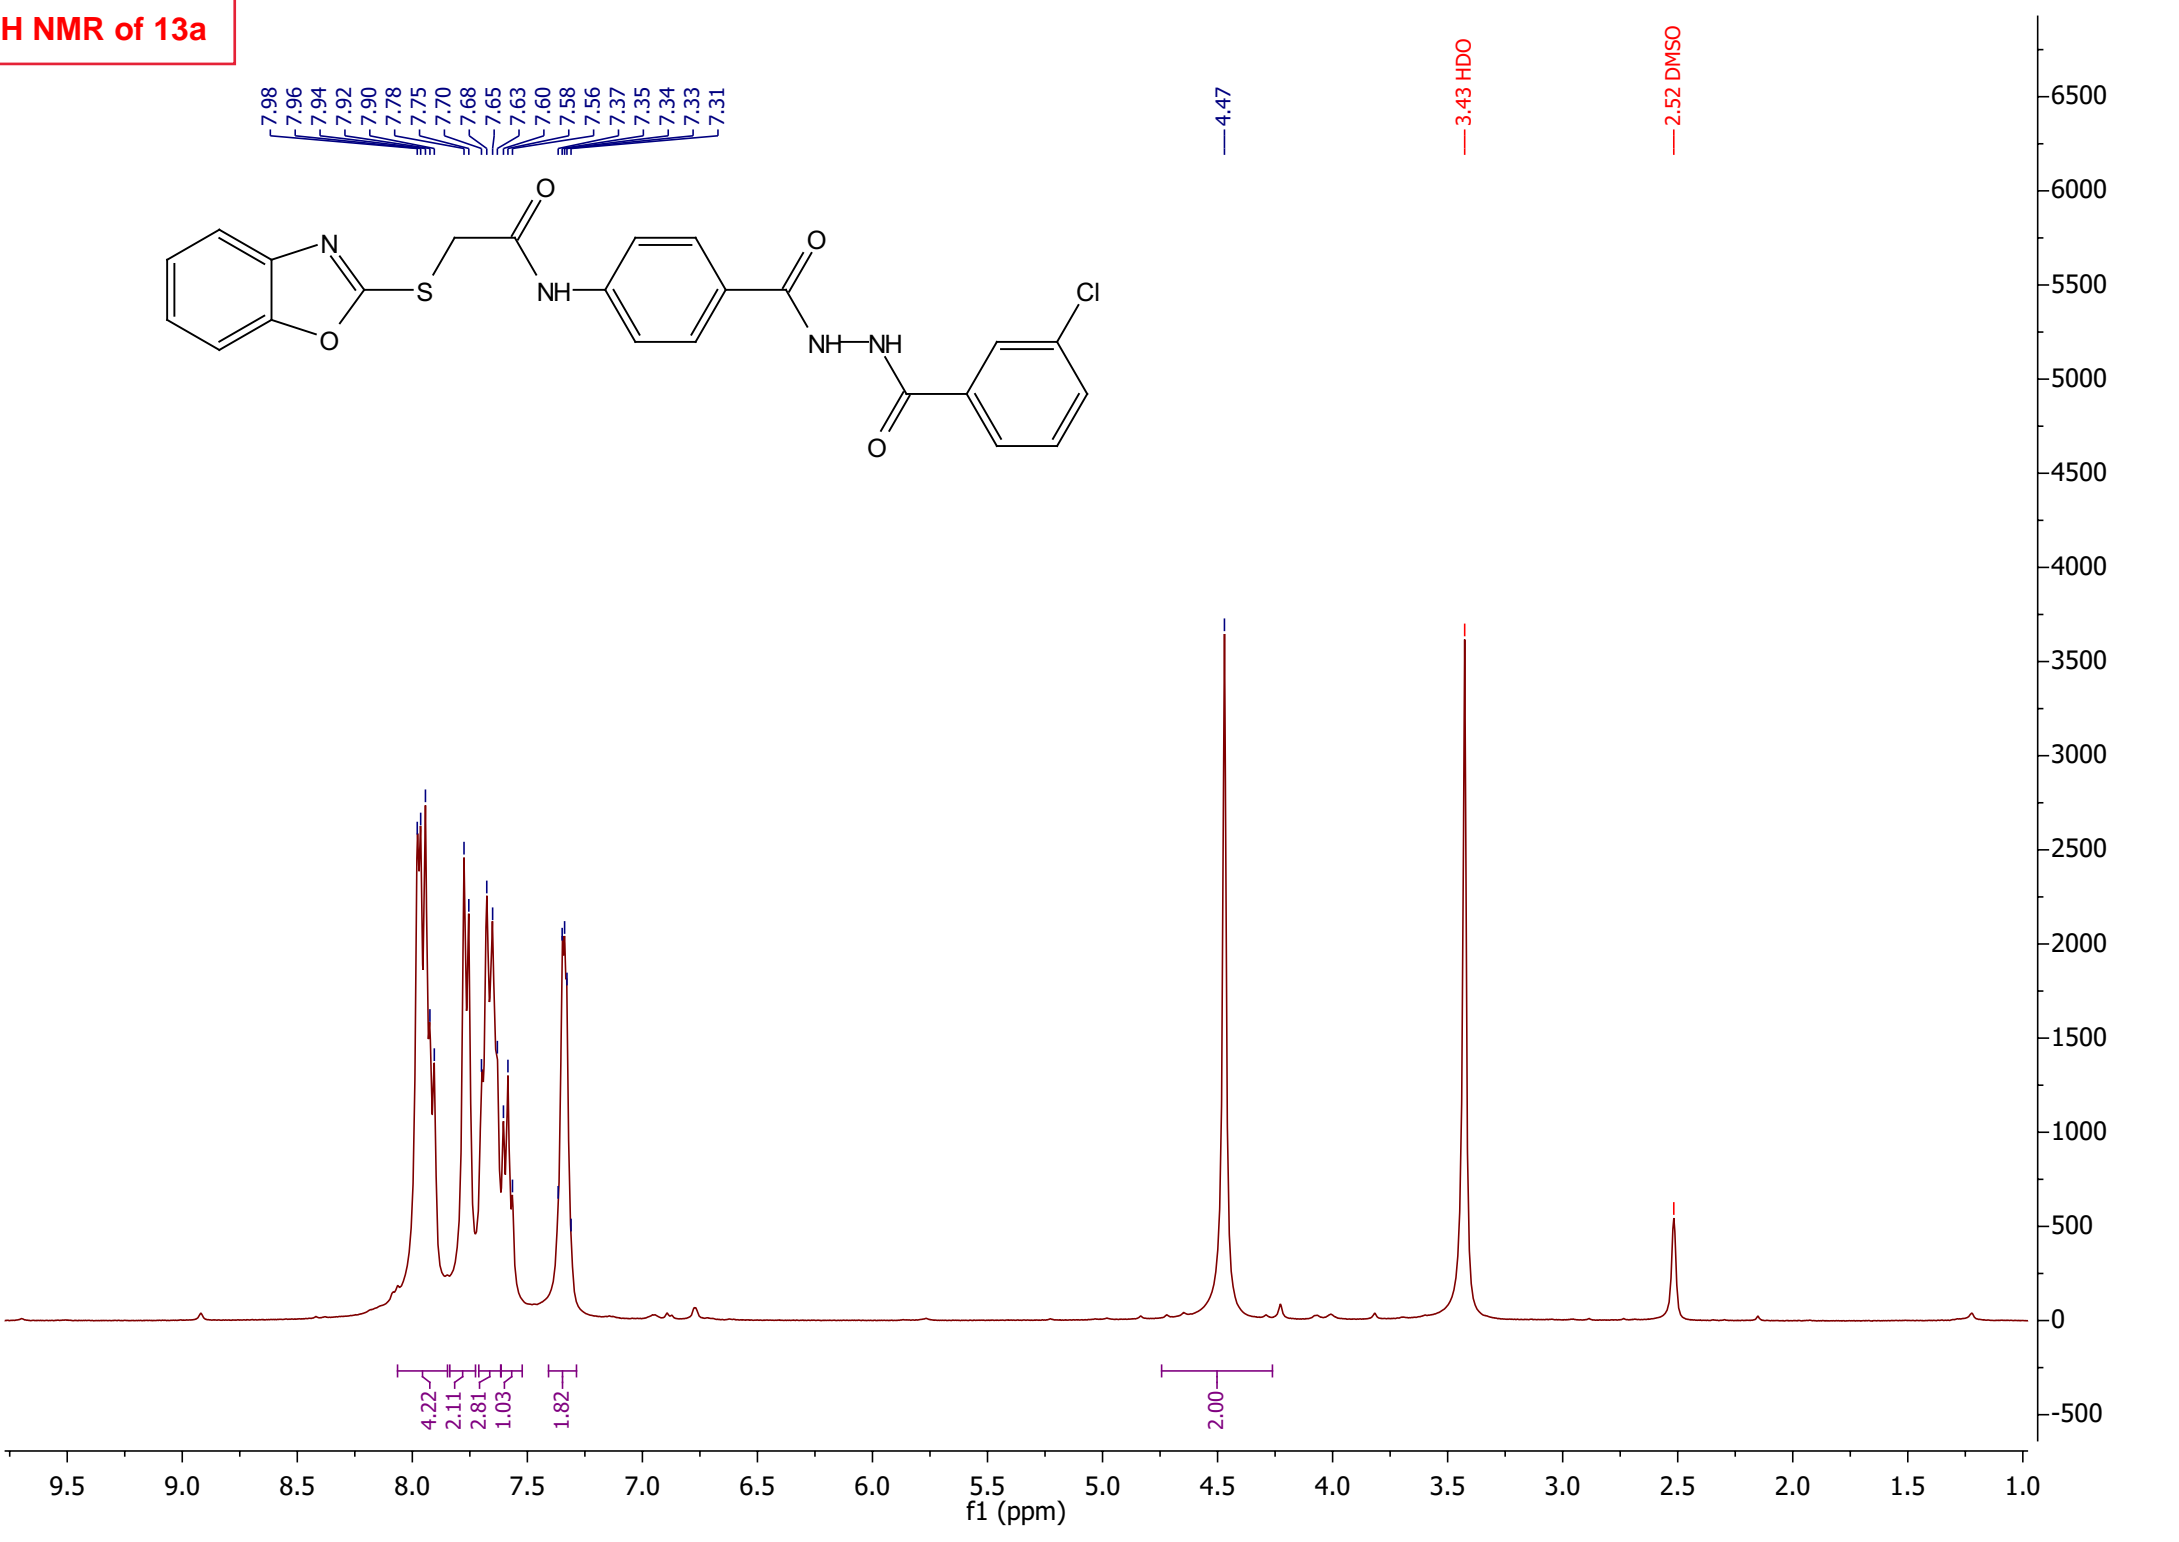

**<sup>1</sup>H NMR of 13a**



—10.79      —10.65      —10.53

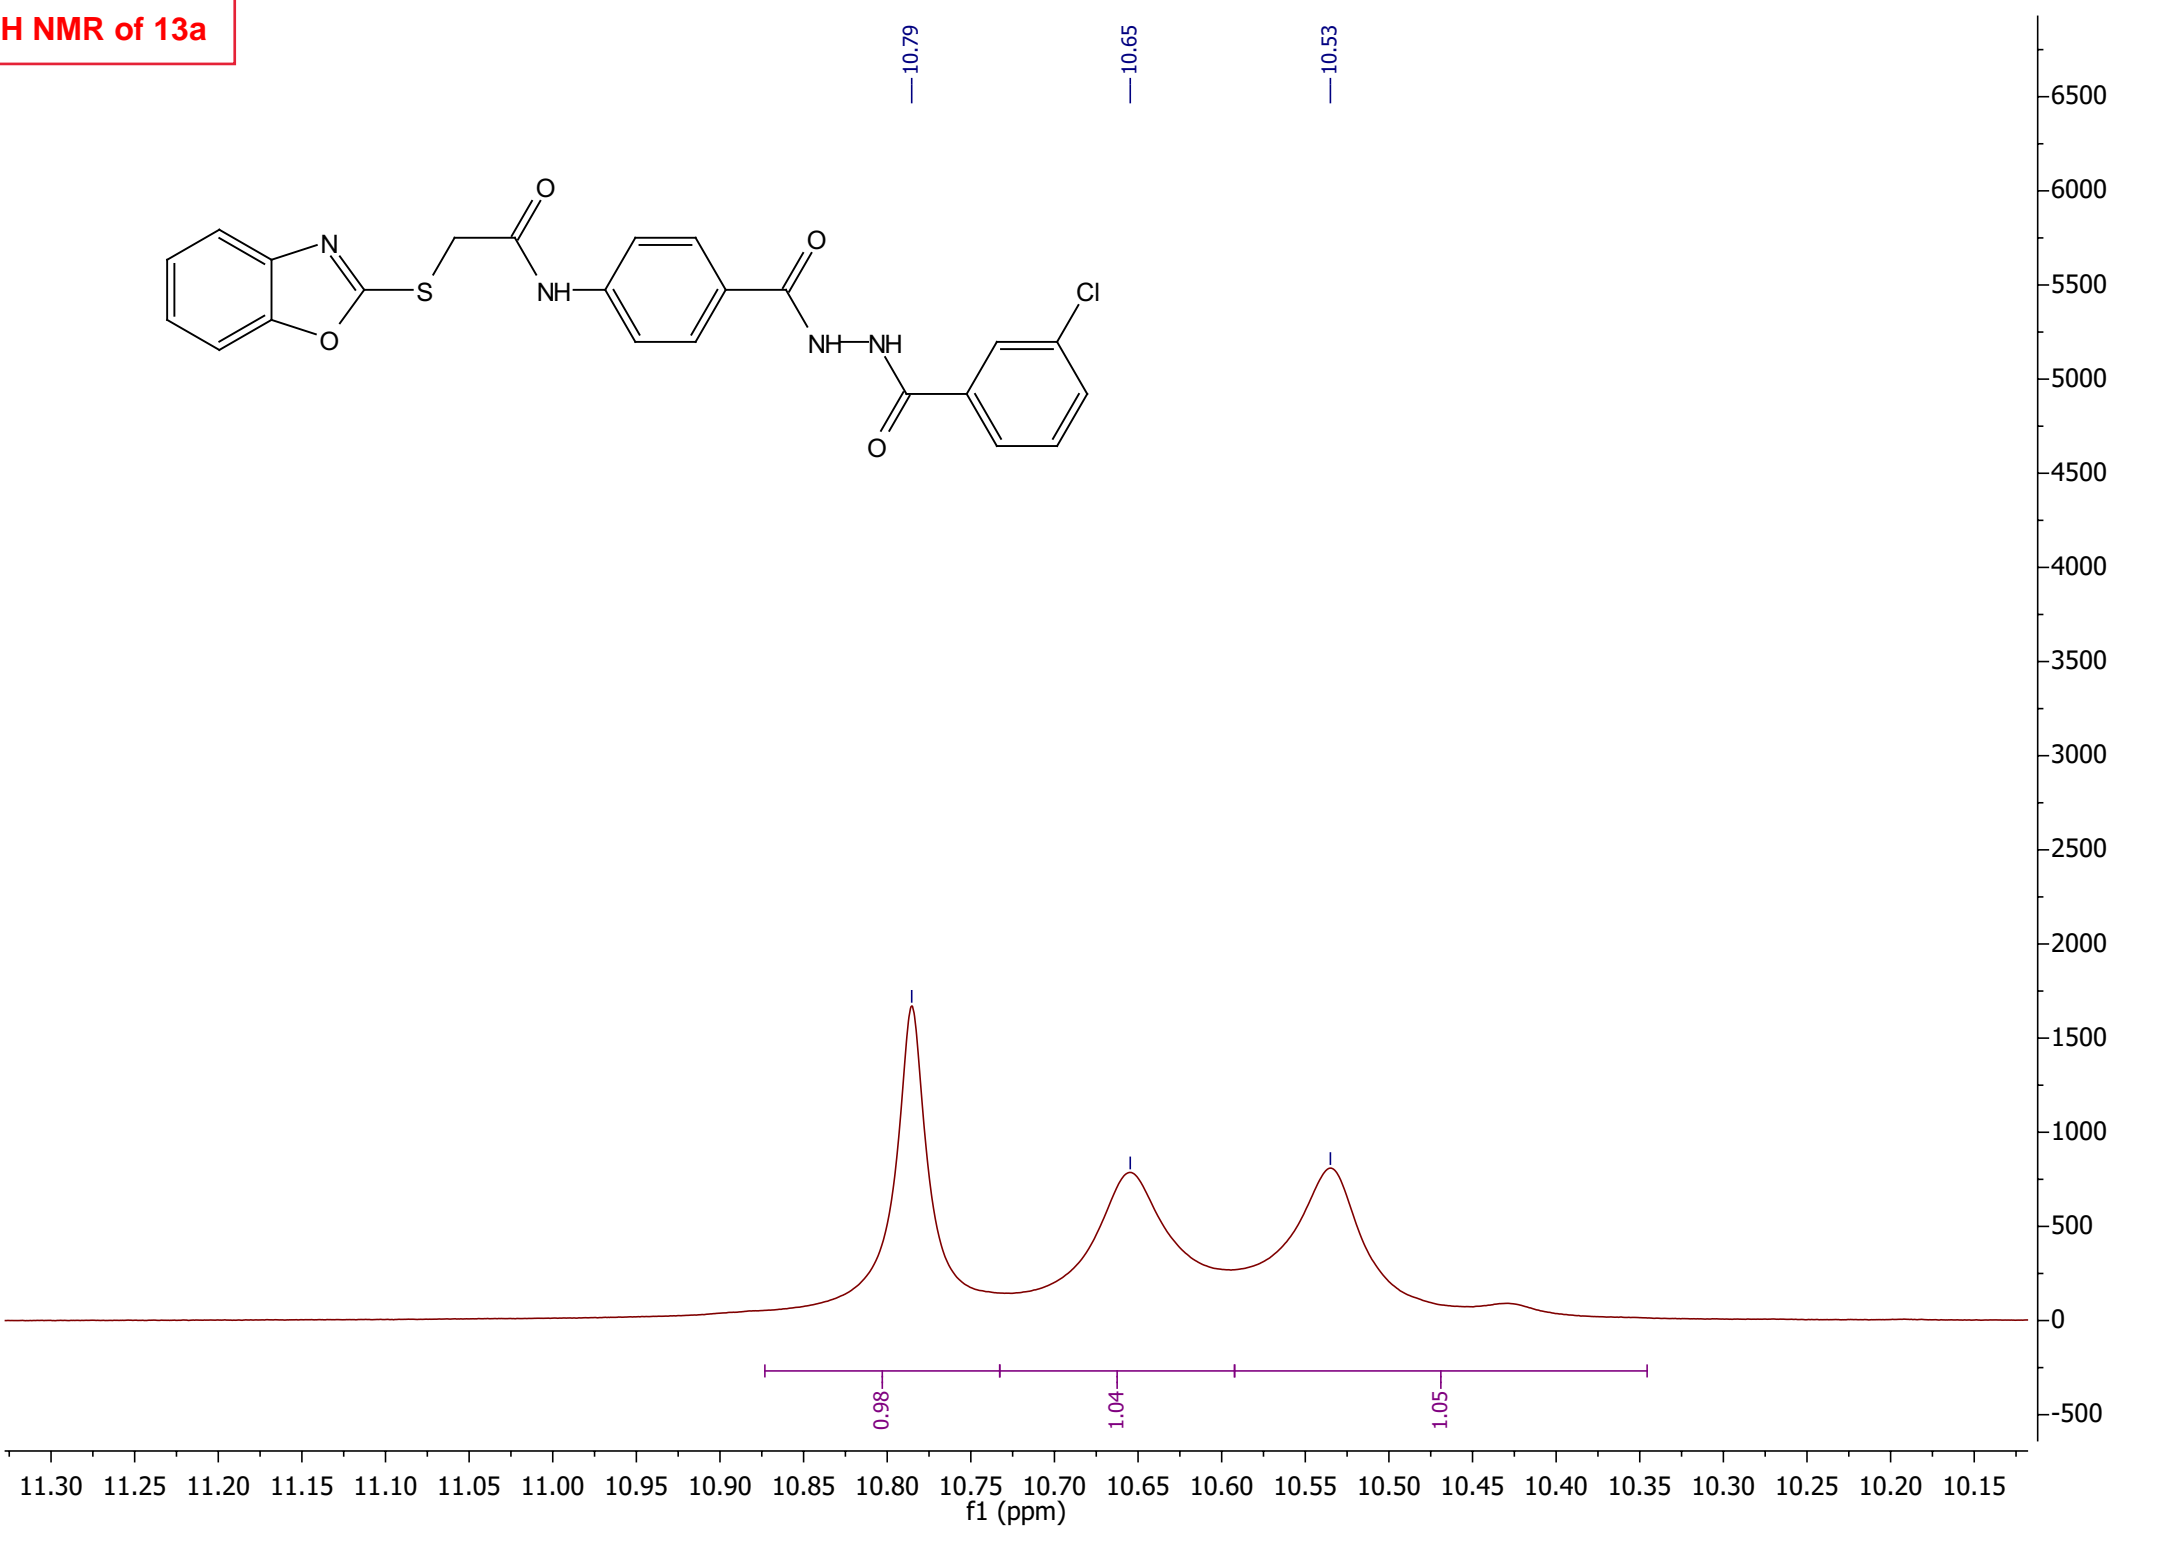

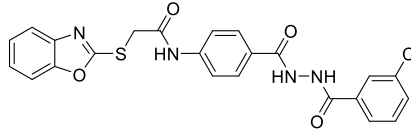

Mass spec. of 13a

RT: 0.00 - 5.34 SM: 7G

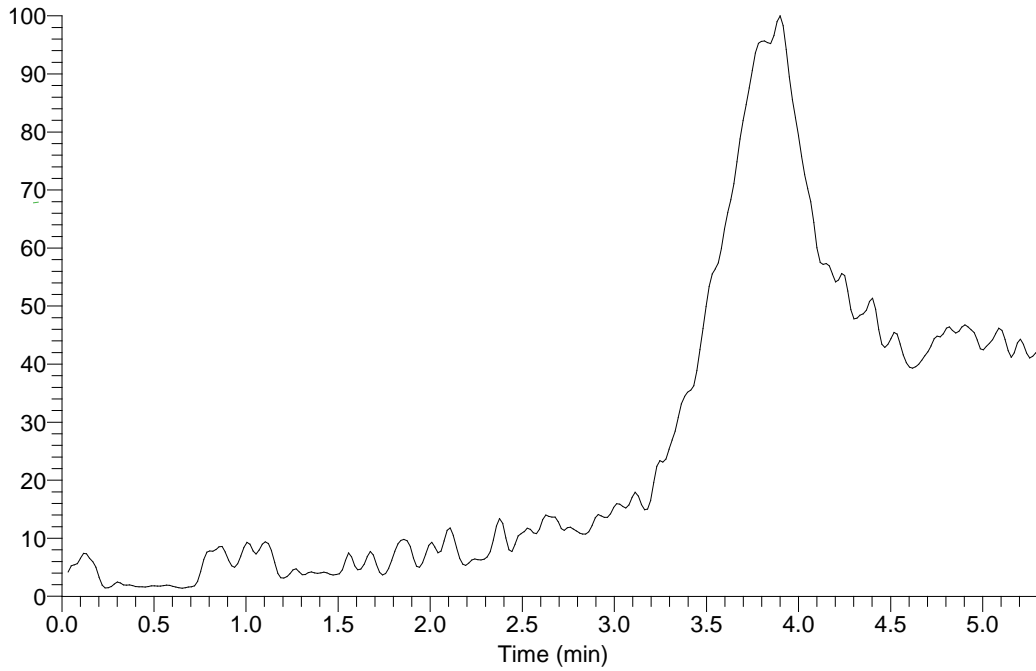

NL:  
4.16E5  
TIC MS  
Hazem-  
Abdelhady-  
PBA54

Hazem-Abdelhady-PBA54 #255 RT: 4.28 AV: 1 NL: 3.79E4  
T: + c EI Full ms [40.00-1000.00]

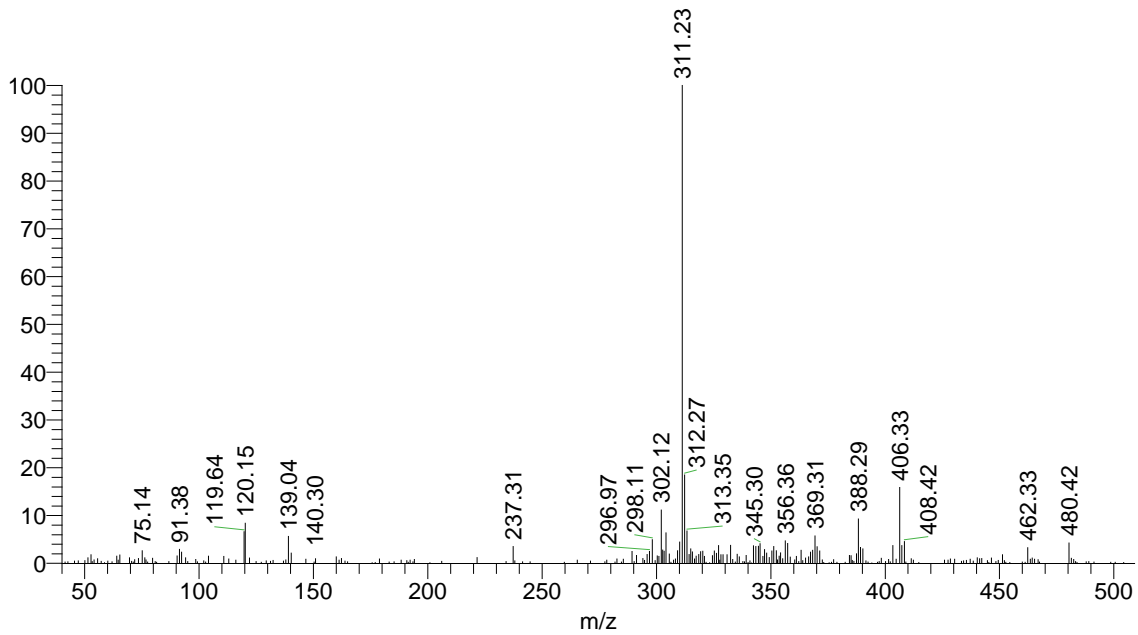

# IR Of Comp. 13b

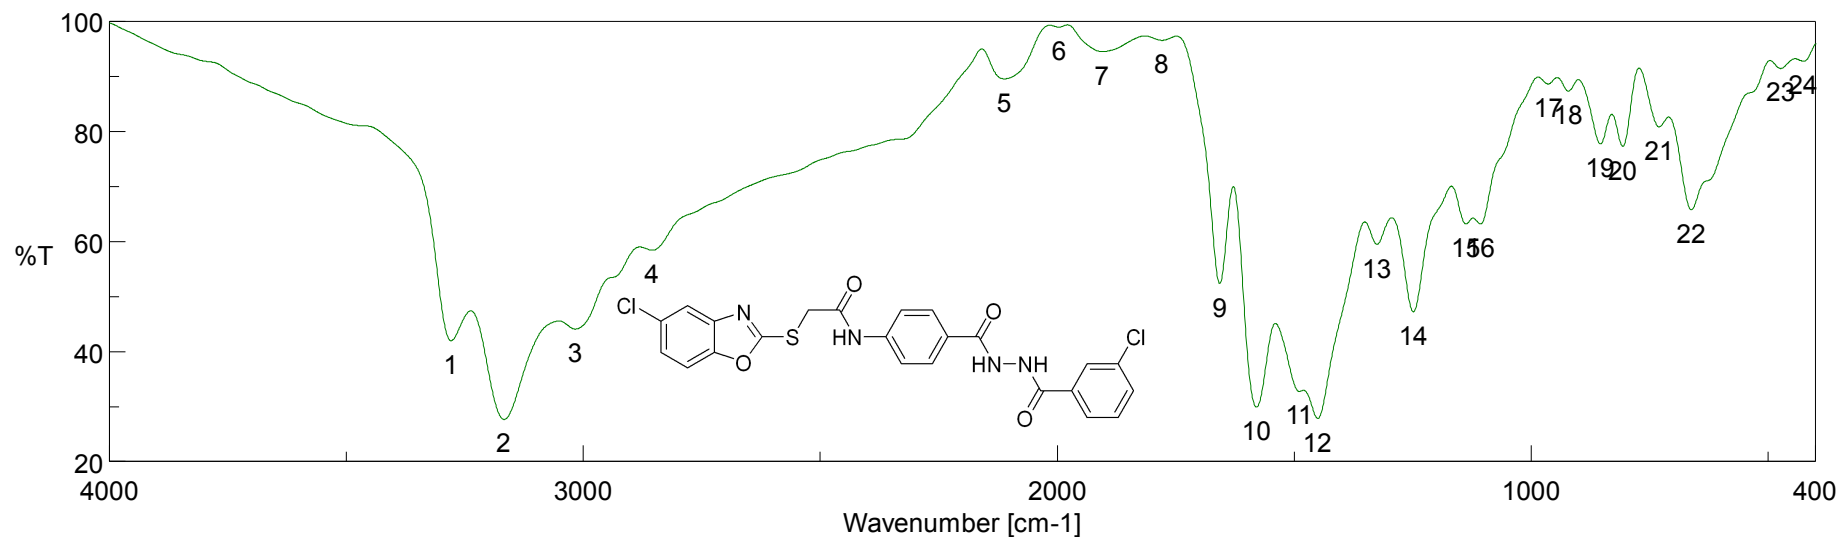

## [ Result of Peak Picking ]

| No. | Position | Intensity | No. | Position | Intensity | No. | Position | Intensity | No. | Position | Intensity |
|-----|----------|-----------|-----|----------|-----------|-----|----------|-----------|-----|----------|-----------|
| 1   | 3279.36  | 41.9412   | 2   | 3167.51  | 27.6324   | 3   | 3017.09  | 44.0511   | 4   | 2855.1   | 58.3746   |
| 5   | 2111.67  | 89.5313   | 6   | 1995.96  | 98.9196   | 7   | 1904.36  | 94.4655   | 8   | 1779.01  | 96.5311   |
| 9   | 1656.55  | 52.3258   | 10  | 1579.41  | 29.8748   | 11  | 1488.78  | 32.7287   | 12  | 1450.21  | 27.805    |
| 13  | 1324.86  | 59.4584   | 14  | 1248.68  | 47.1907   | 15  | 1136.83  | 63.1437   | 16  | 1106.94  | 63.1547   |
| 17  | 963.269  | 88.6103   | 18  | 920.843  | 87.3138   | 19  | 853.347  | 77.6958   | 20  | 806.099  | 77.2693   |
| 21  | 729.925  | 80.8051   | 22  | 661.464  | 65.7331   | 23  | 472.474  | 91.4163   | 24  | 425.227  | 92.7091   |

# <sup>1</sup>H NMR of 13b

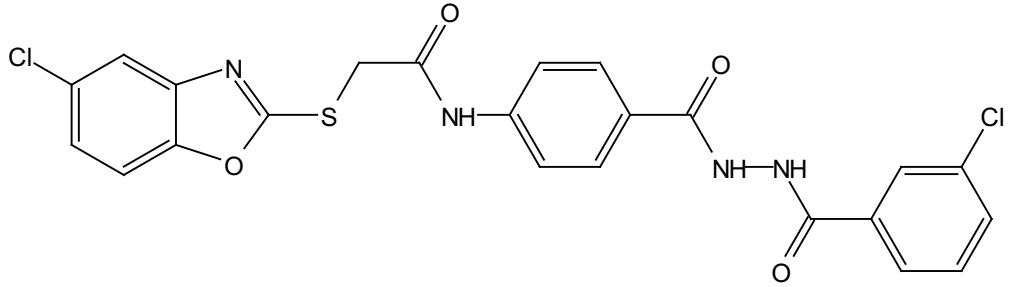

10.79  
10.68  
10.65  
10.53  
10.43  
7.98  
7.98  
7.97  
7.96  
7.94  
7.92  
7.90  
7.82  
7.77  
7.75  
7.74  
7.71  
7.70  
7.69  
7.68  
7.67  
7.60  
7.58  
7.56  
7.38  
7.38  
7.36  
7.35  
4.48

3.42 H<sub>2</sub>O

2.52 DMSO  
2.52 DMSO  
2.51 DMSO

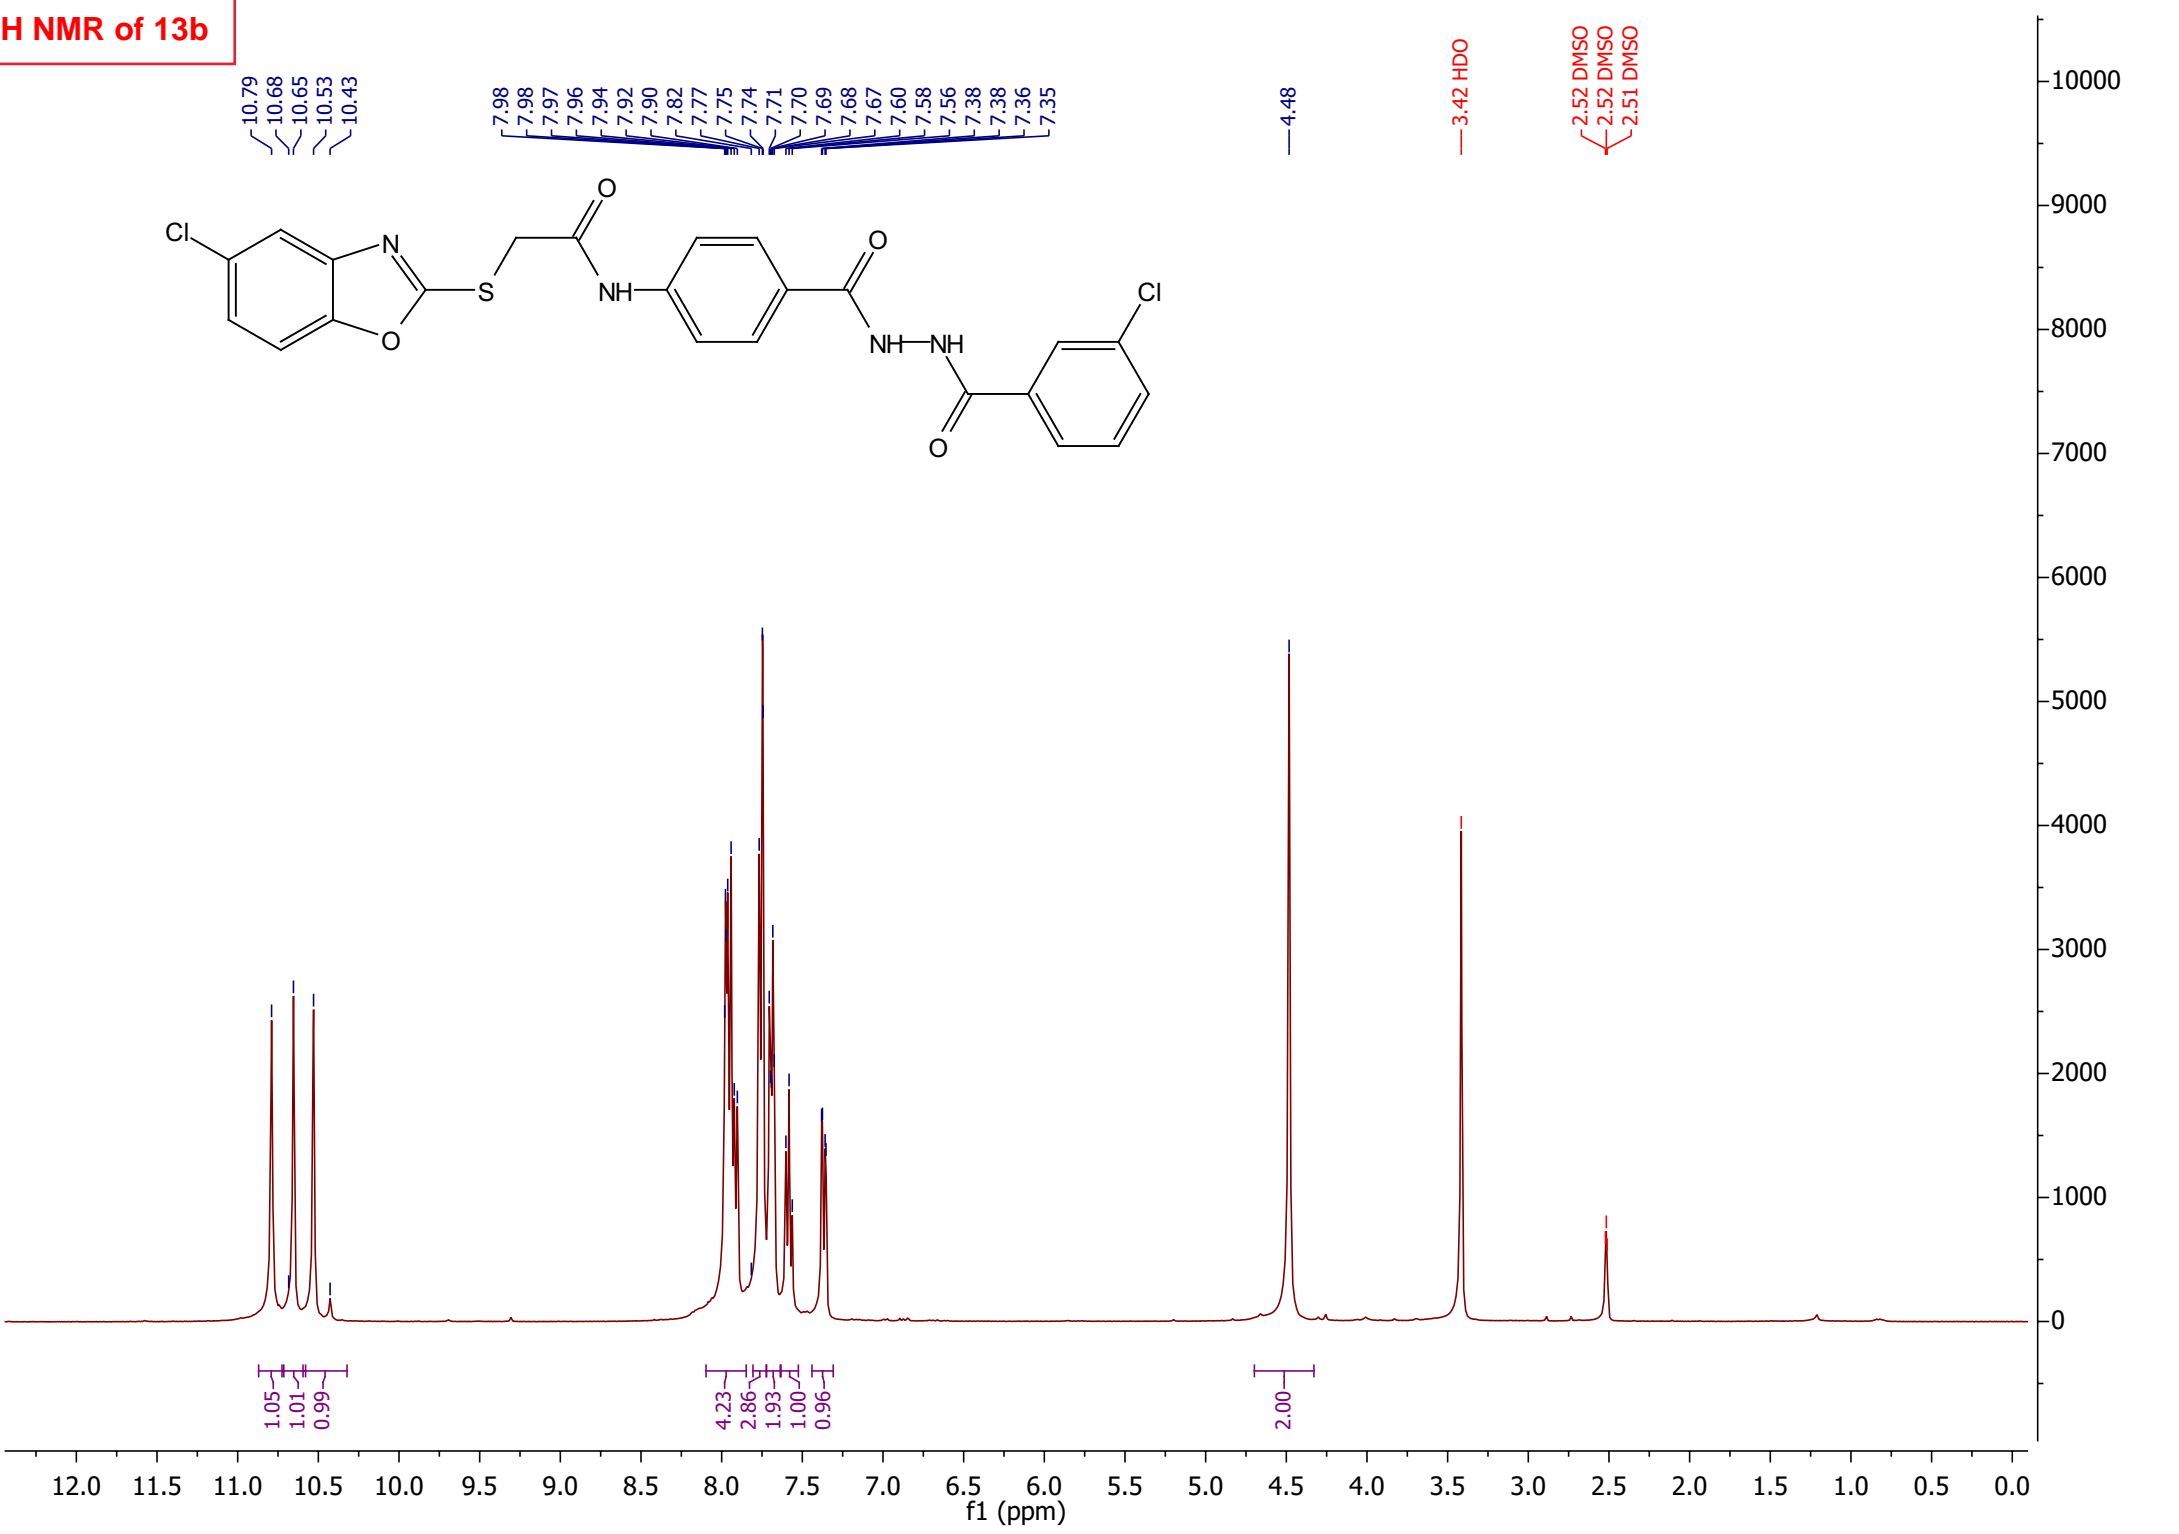

**<sup>1</sup>H NMR of 13b**



7.98  
7.98  
7.97  
7.96  
7.94  
7.92  
7.90

7.82

7.77  
7.75  
7.74

7.71  
7.70  
7.69  
7.68  
7.67

7.60  
7.58  
7.56

7.38  
7.38  
7.36  
7.35

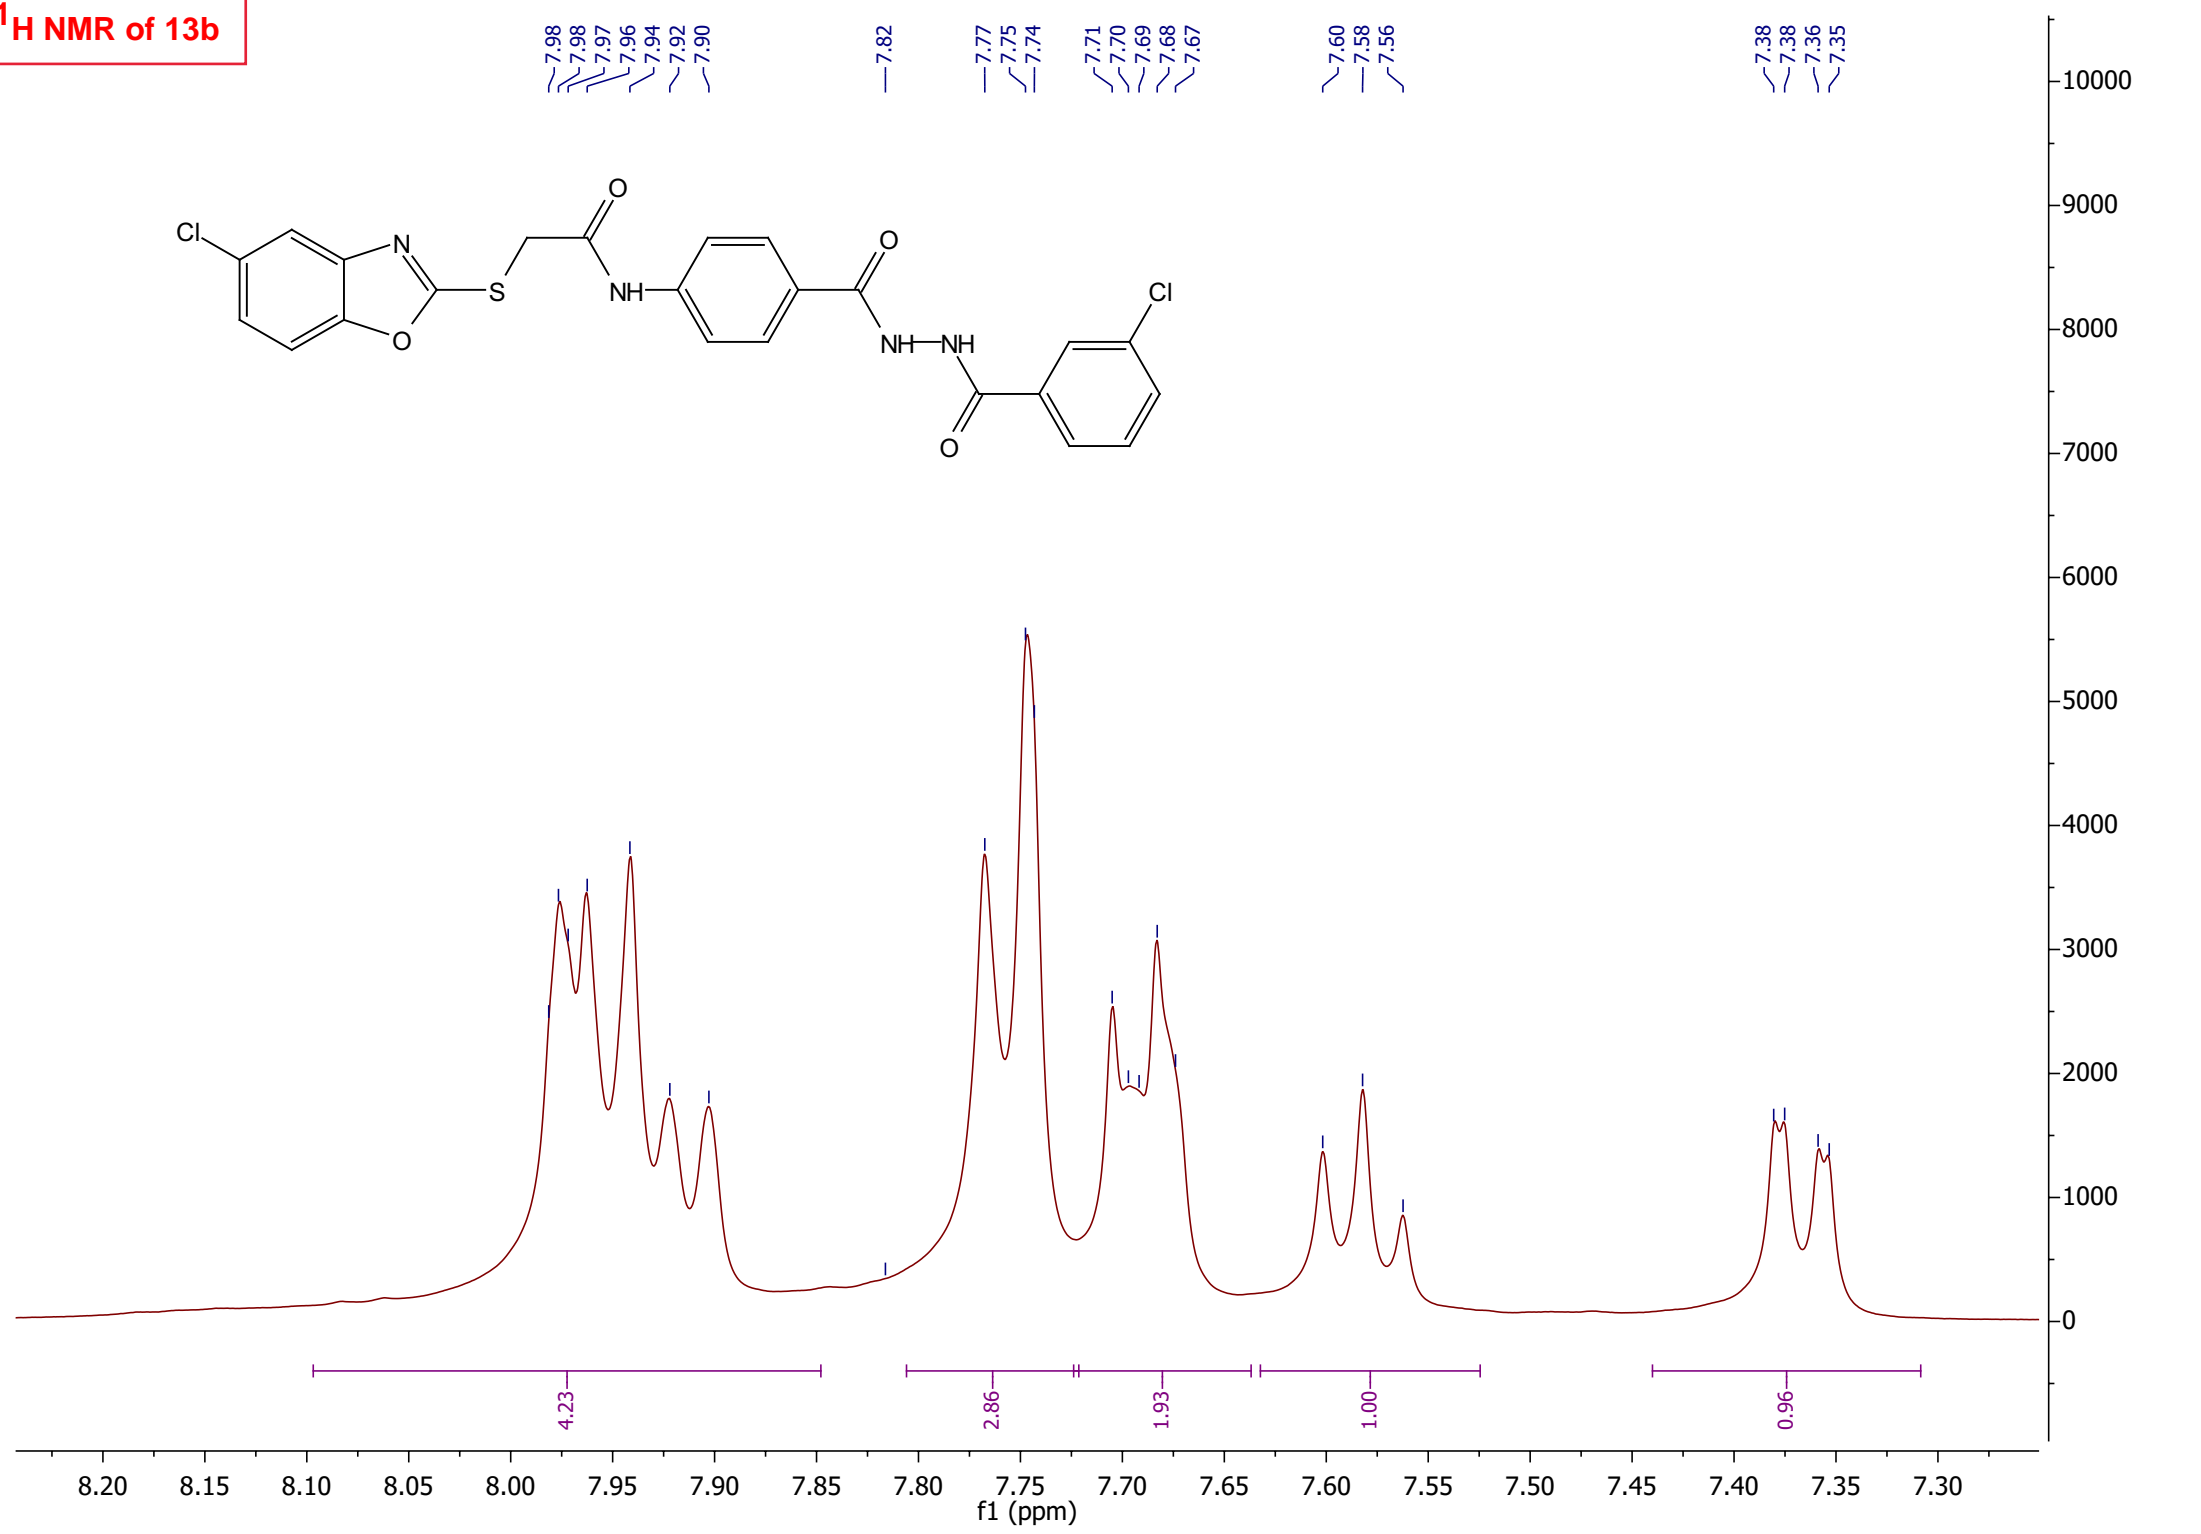

**<sup>1</sup>H NMR of 13b**

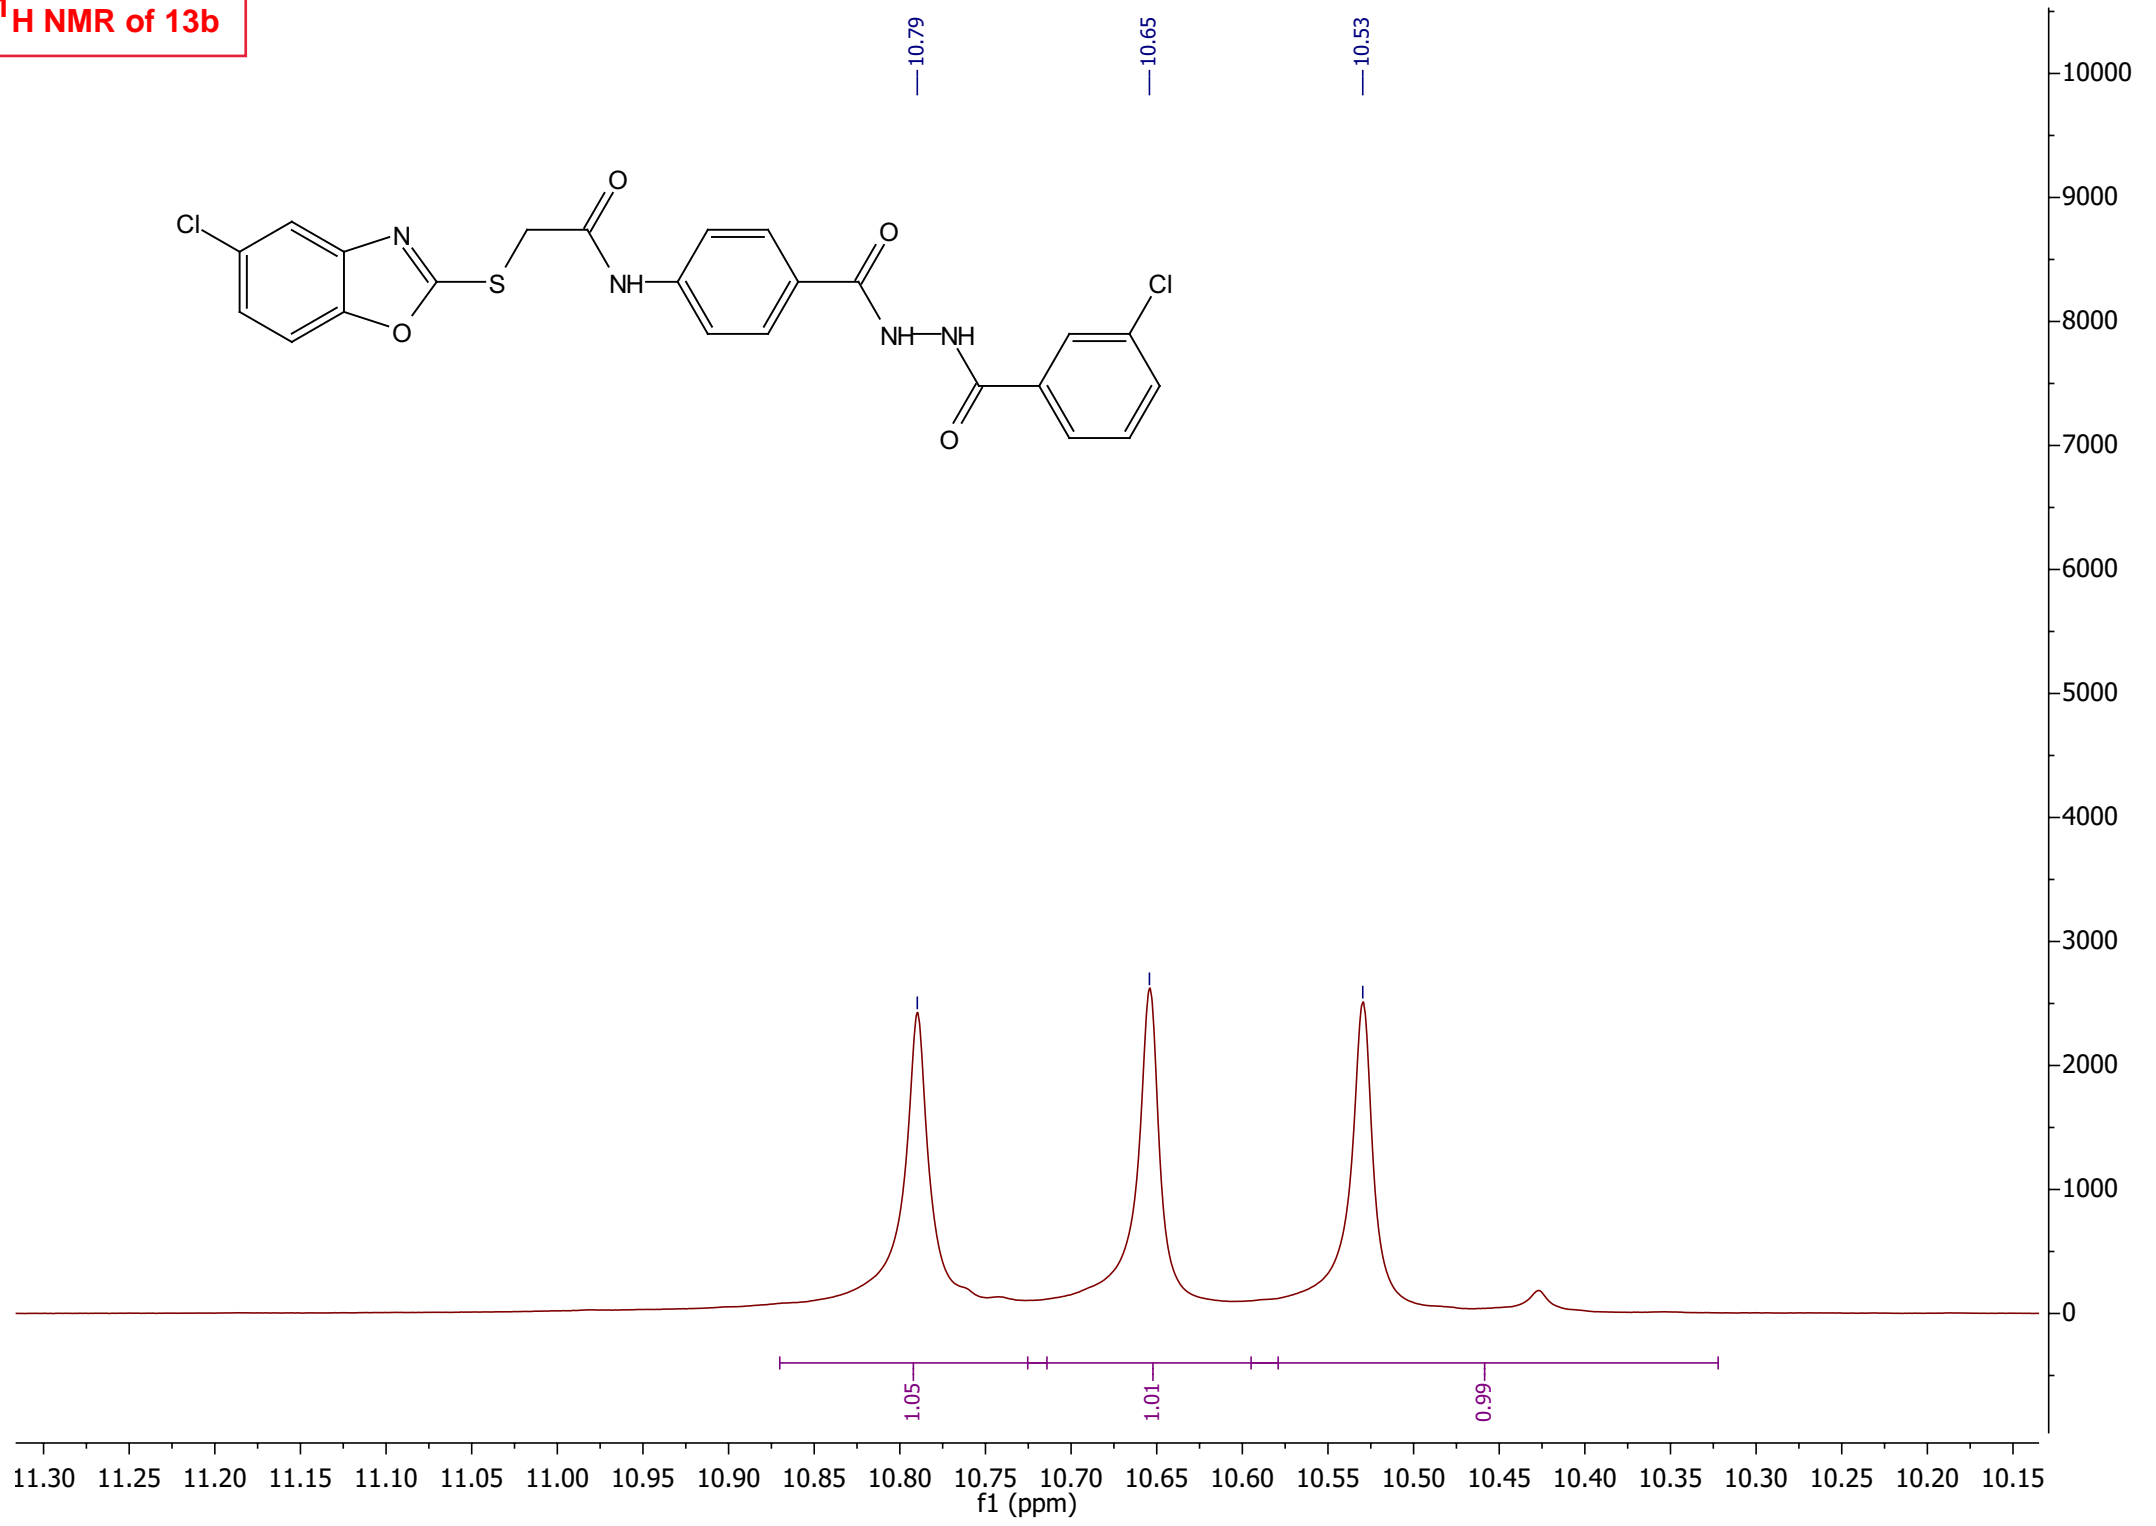

**<sup>13</sup>C NMR of 13b**



166.39  
165.80  
165.04  
150.61  
142.96  
134.99  
133.87  
131.07  
129.48  
129.08  
127.75  
126.66  
124.76  
119.02  
118.51  
111.97

40.59 DMSO  
40.38 DMSO  
40.17 DMSO  
39.96 DMSO  
39.76 DMSO  
39.55 DMSO  
39.34 DMSO  
37.44

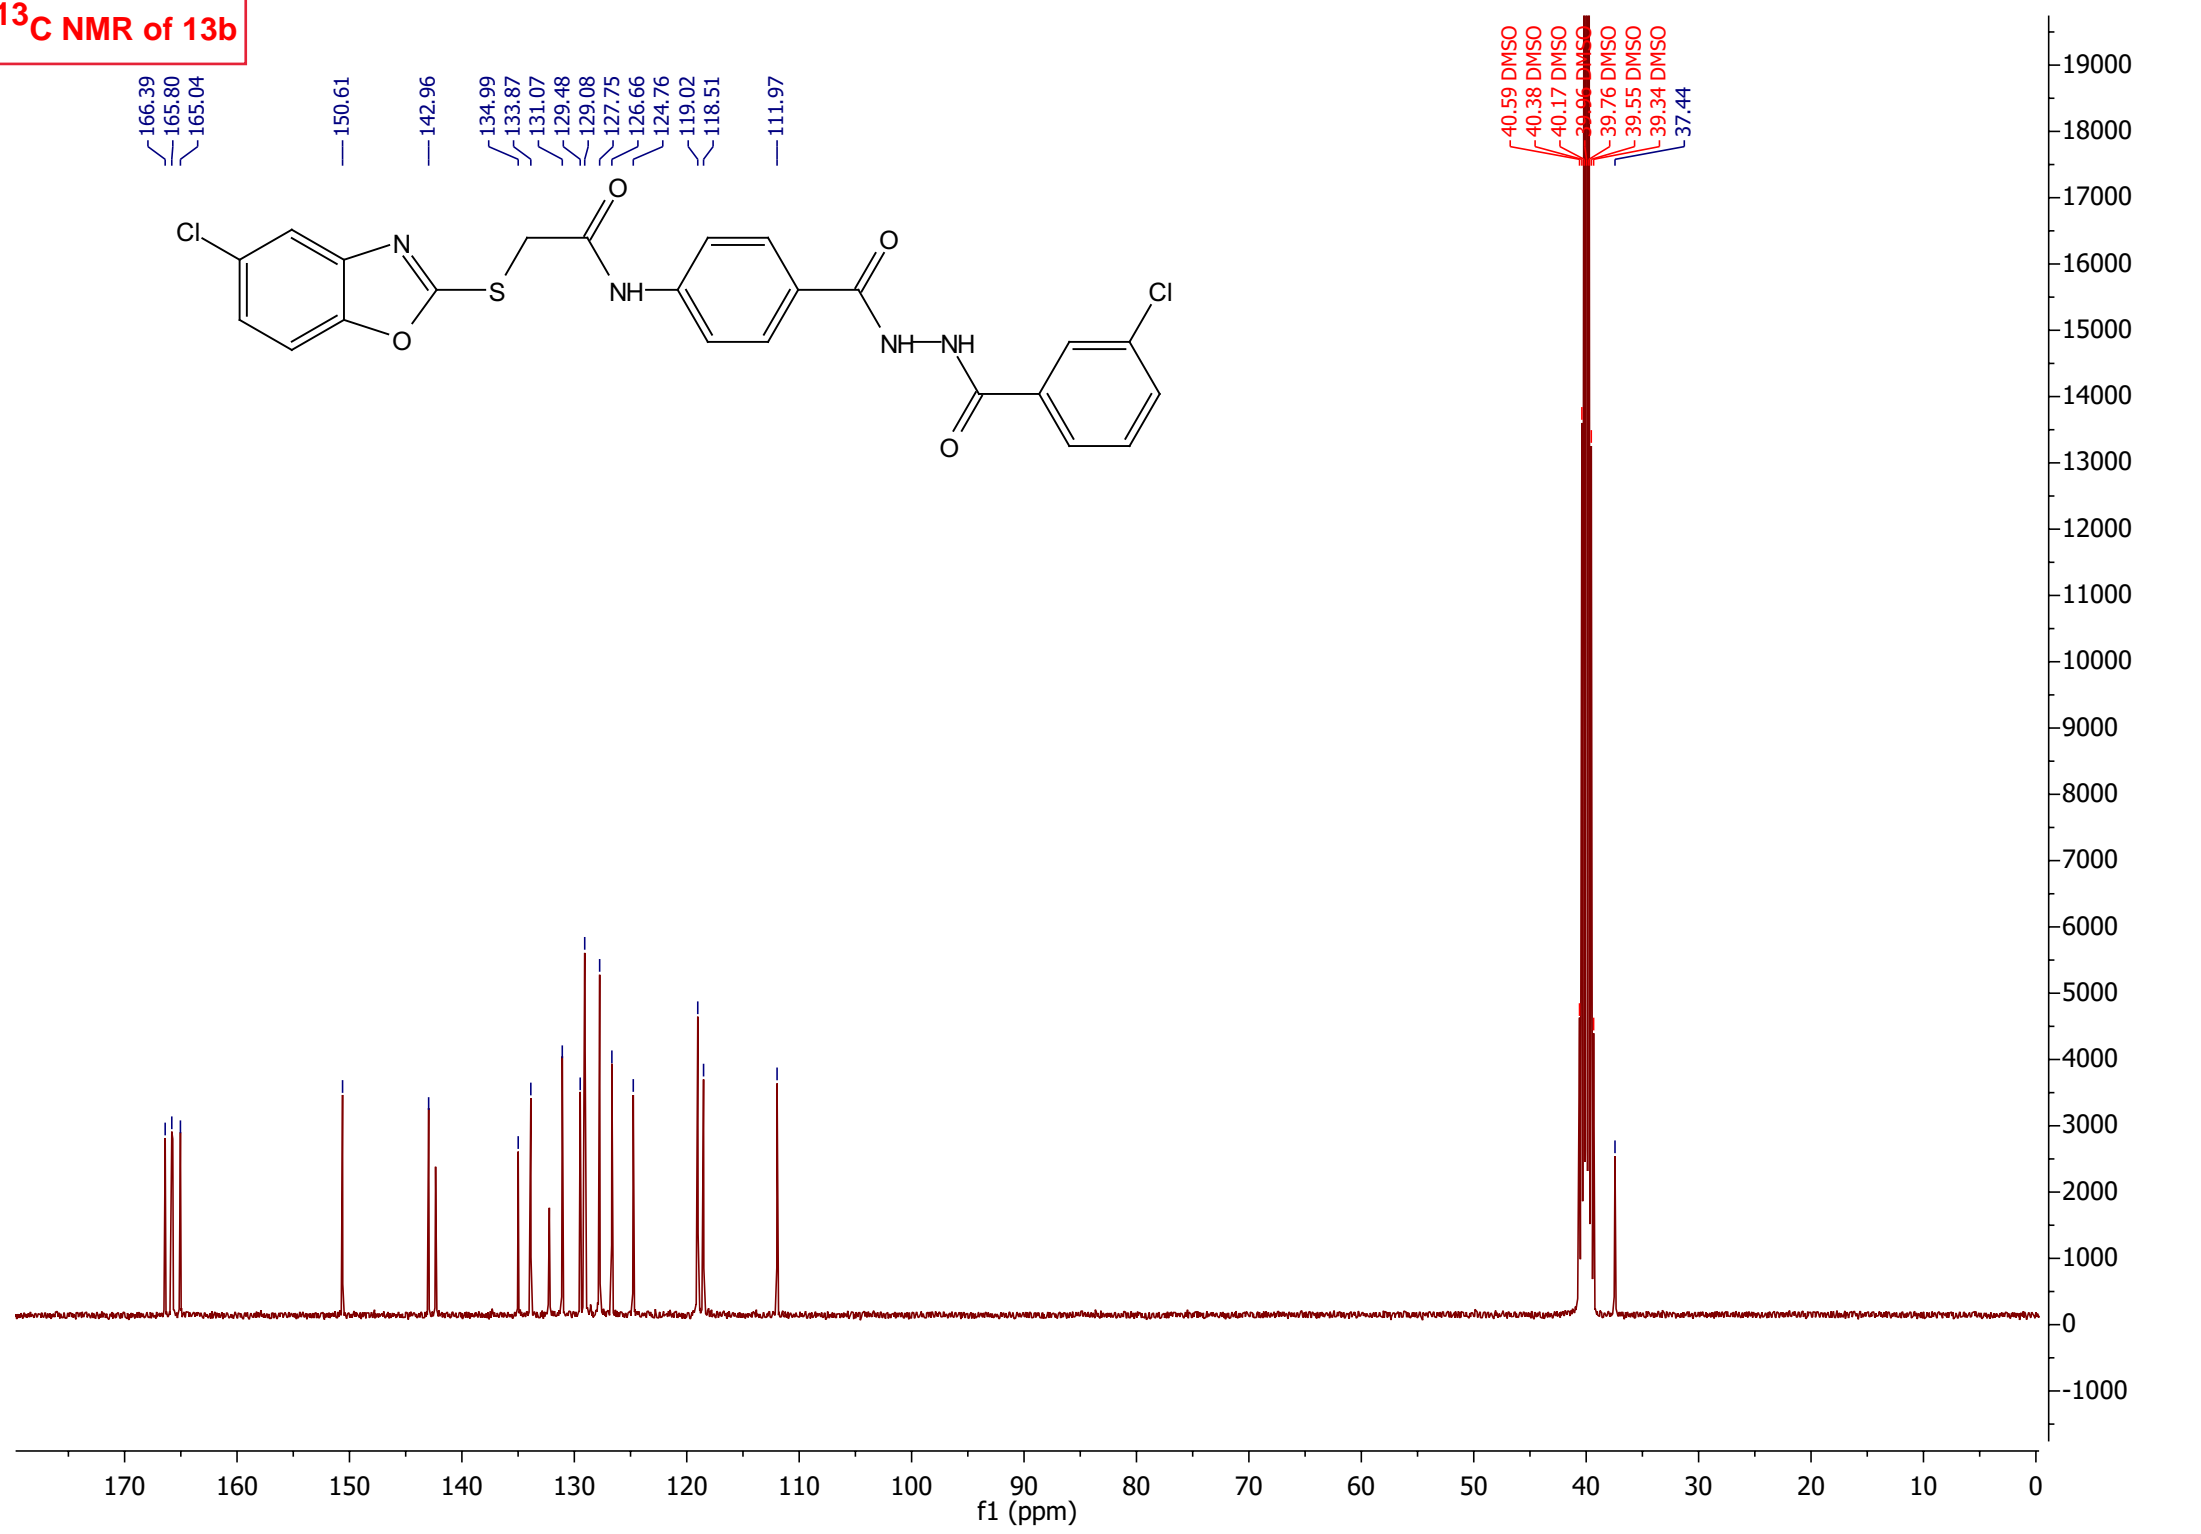



**$^{13}\text{C}$  NMR of 13b**

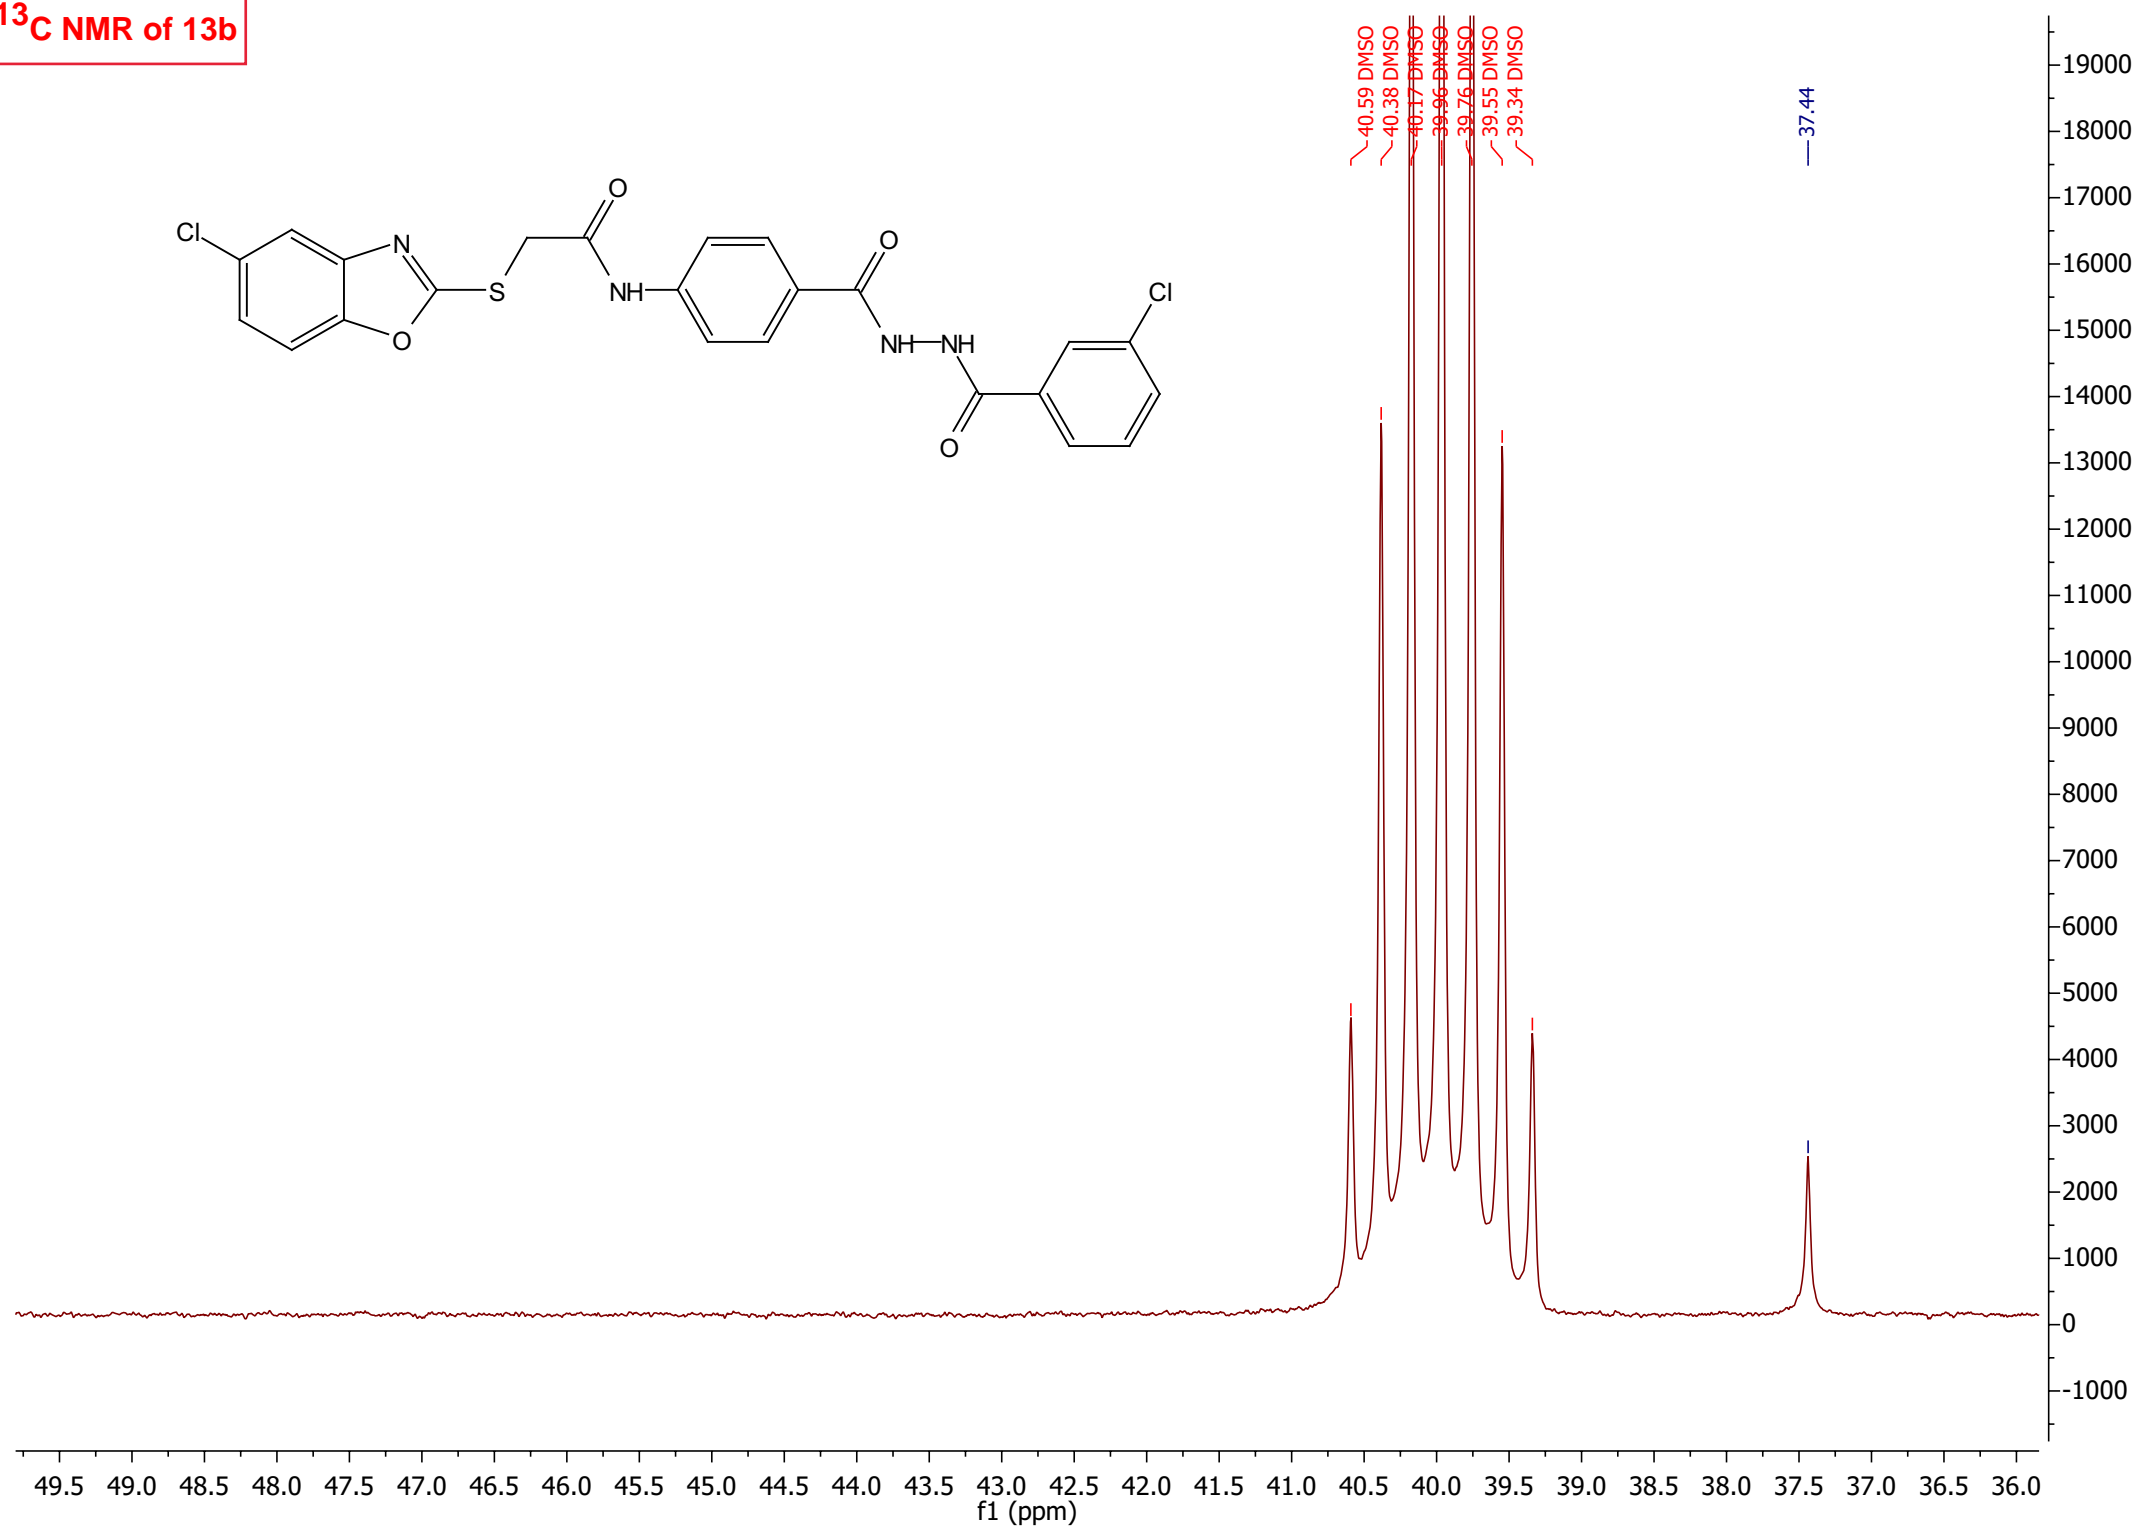

**$^{13}\text{C}$  NMR of 13b**

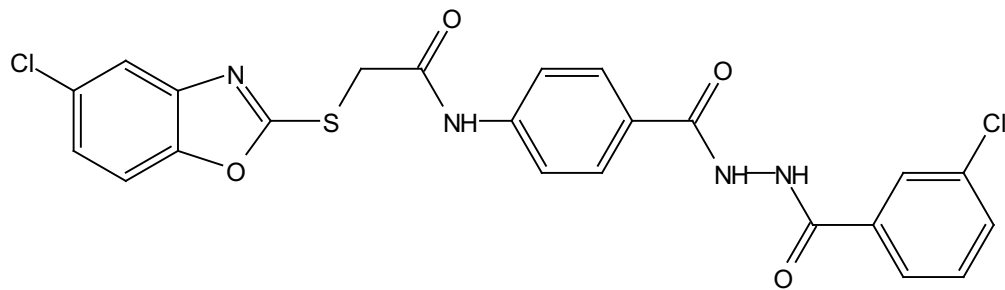

166.39  
165.80  
165.04

150.61

142.96

134.99  
133.87

131.07  
129.48  
129.08  
127.75  
126.66  
124.76

119.02  
118.51

111.97

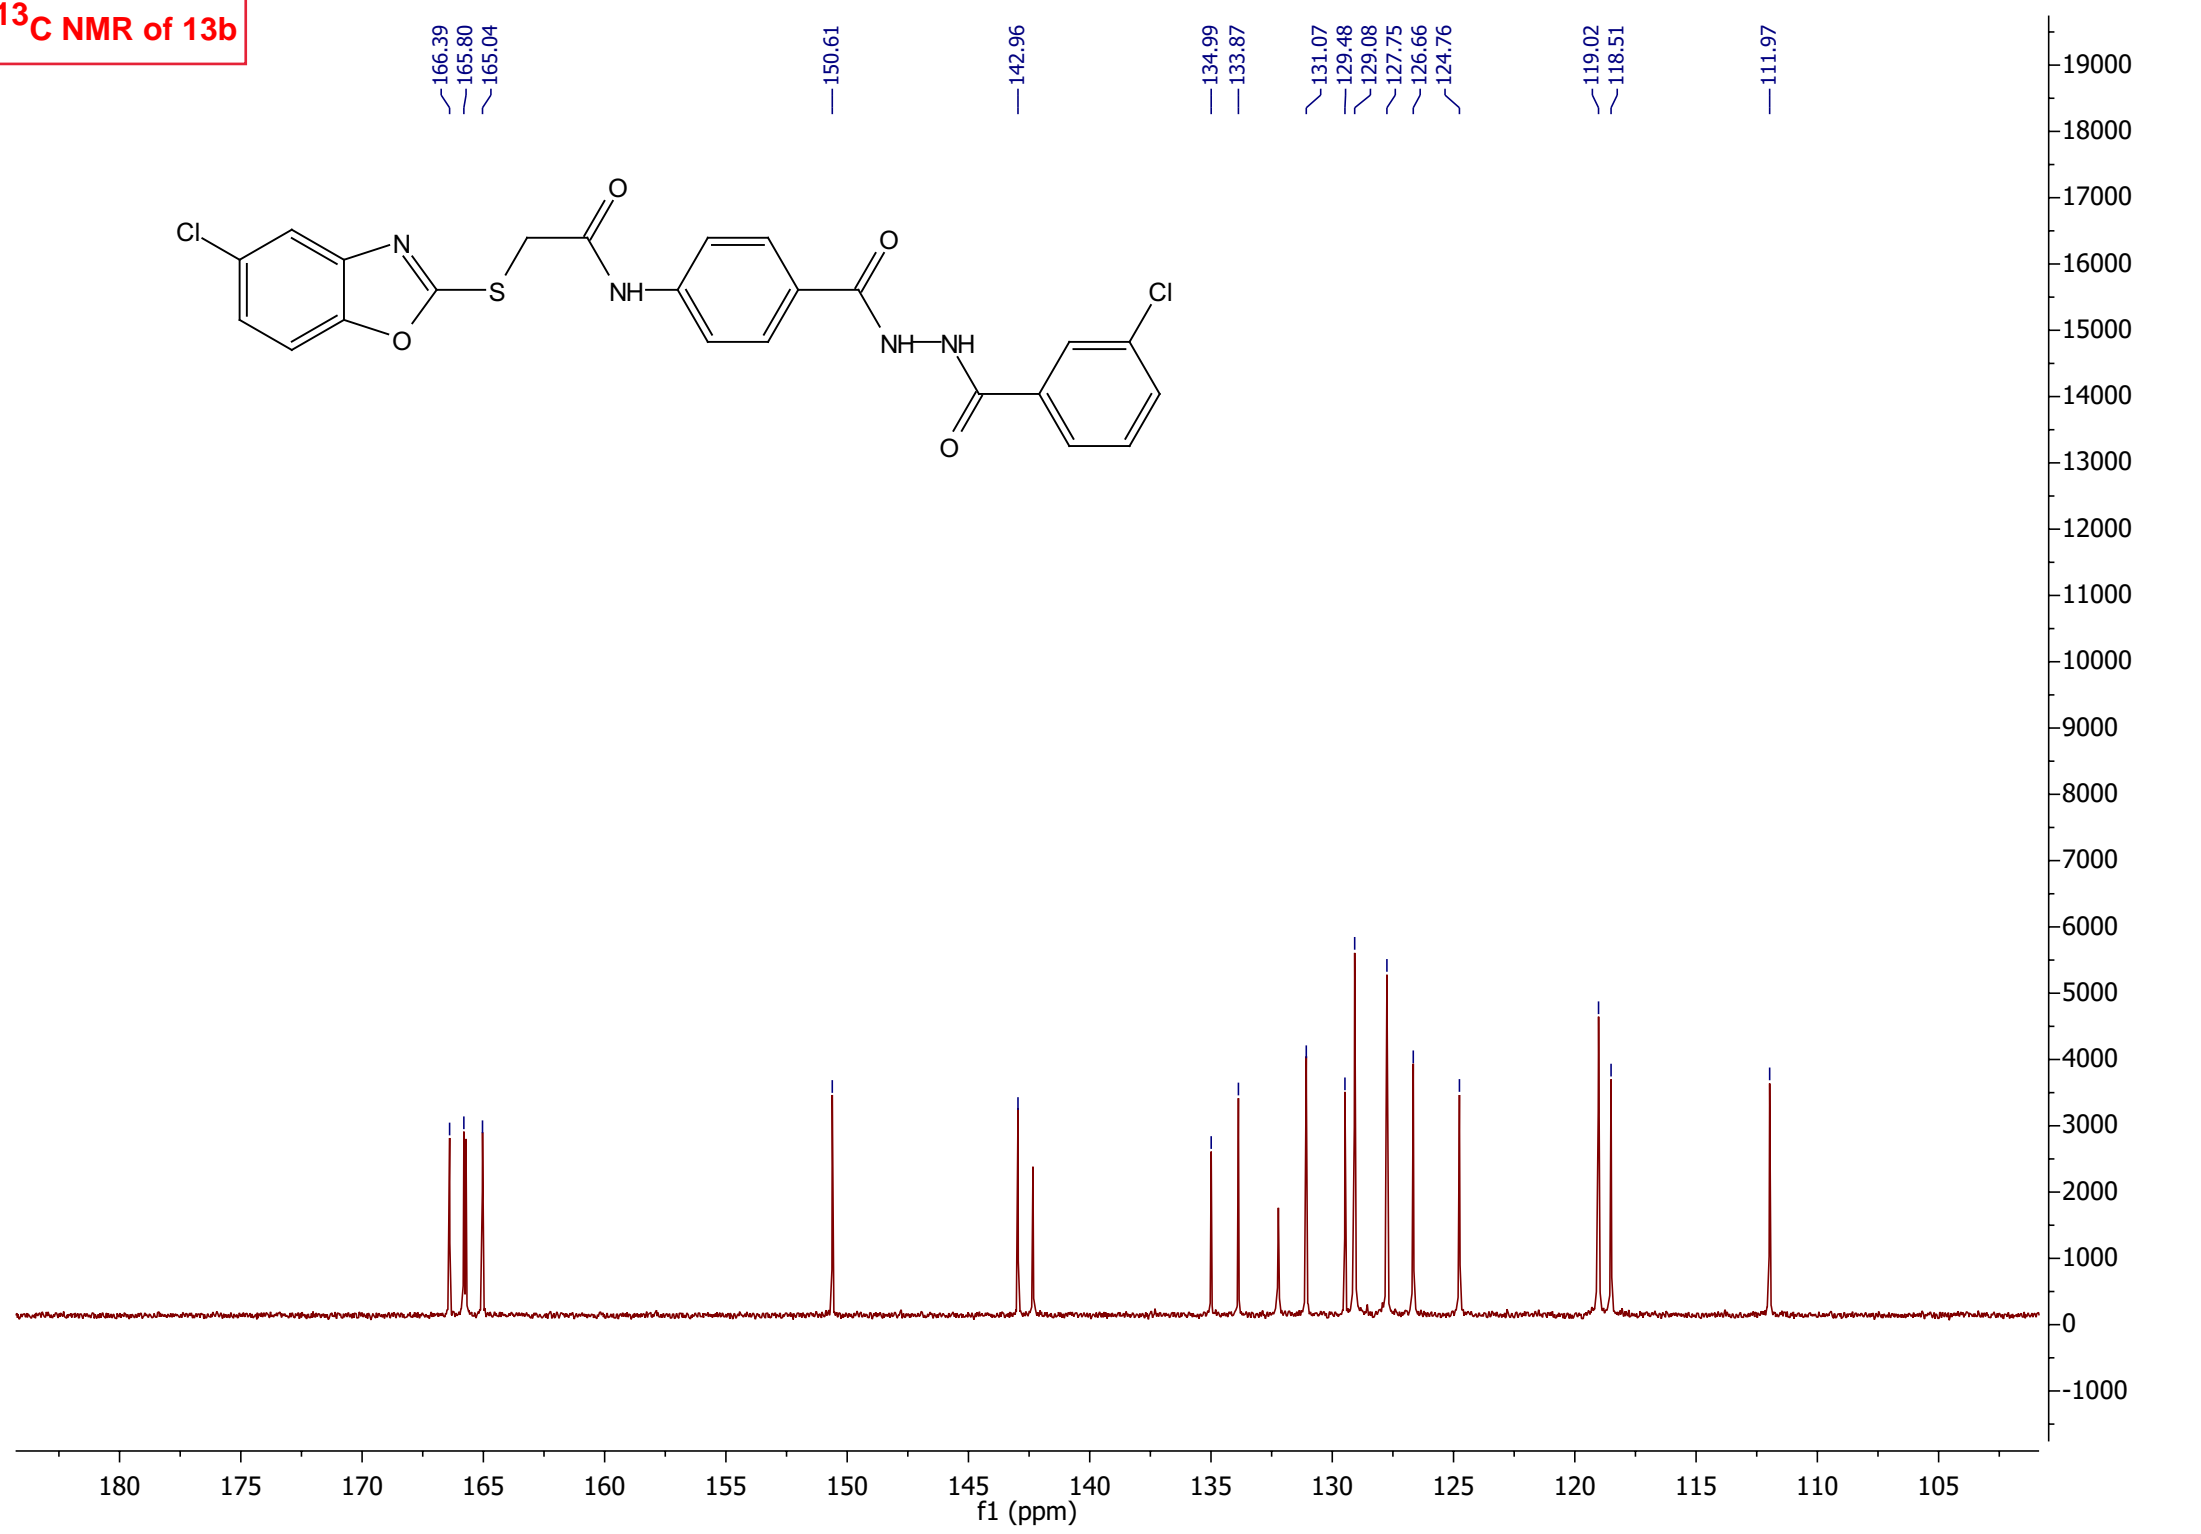

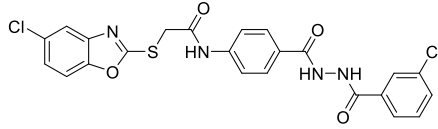

Mass spec. of 13b

RT: 0.00 - 5.51 SM: 7G

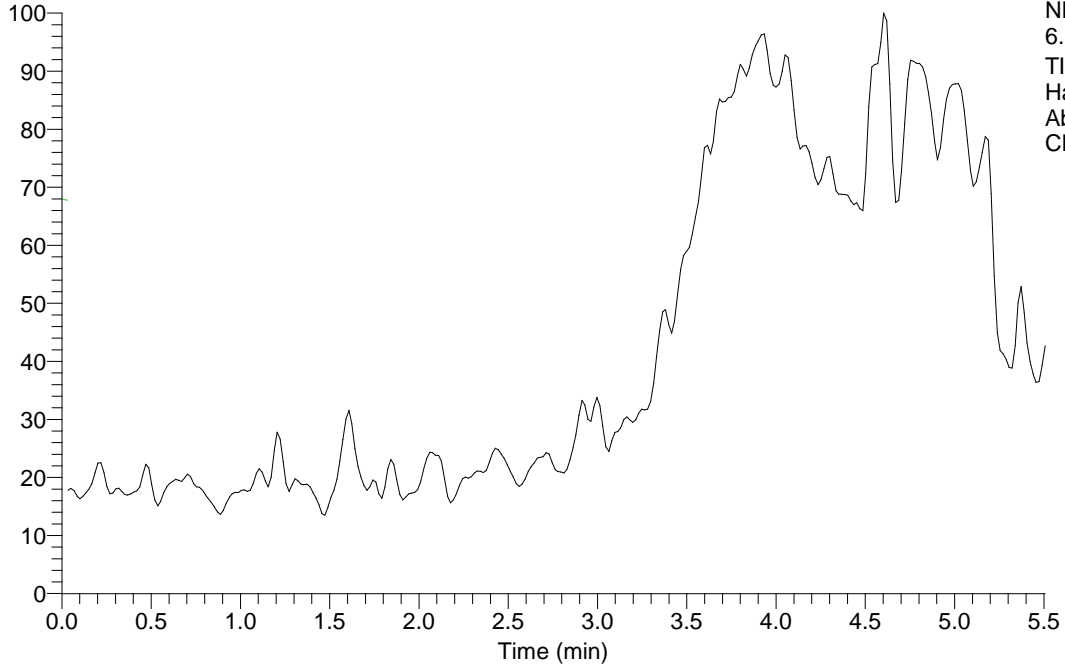

Hazem-Abdelhady-CBA54 #320-326 RT: 5.37-5.47 AV: 7 NL: 1.86E3  
T: + c EI Full ms [40.00-1000.00]

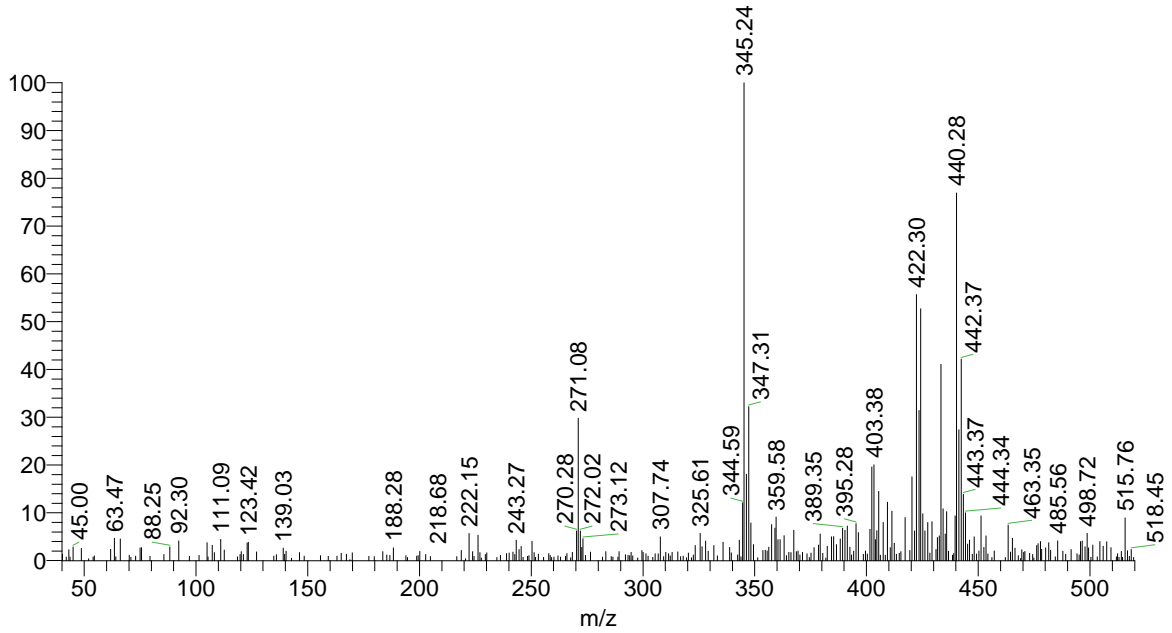

# IR Of Comp. 13c

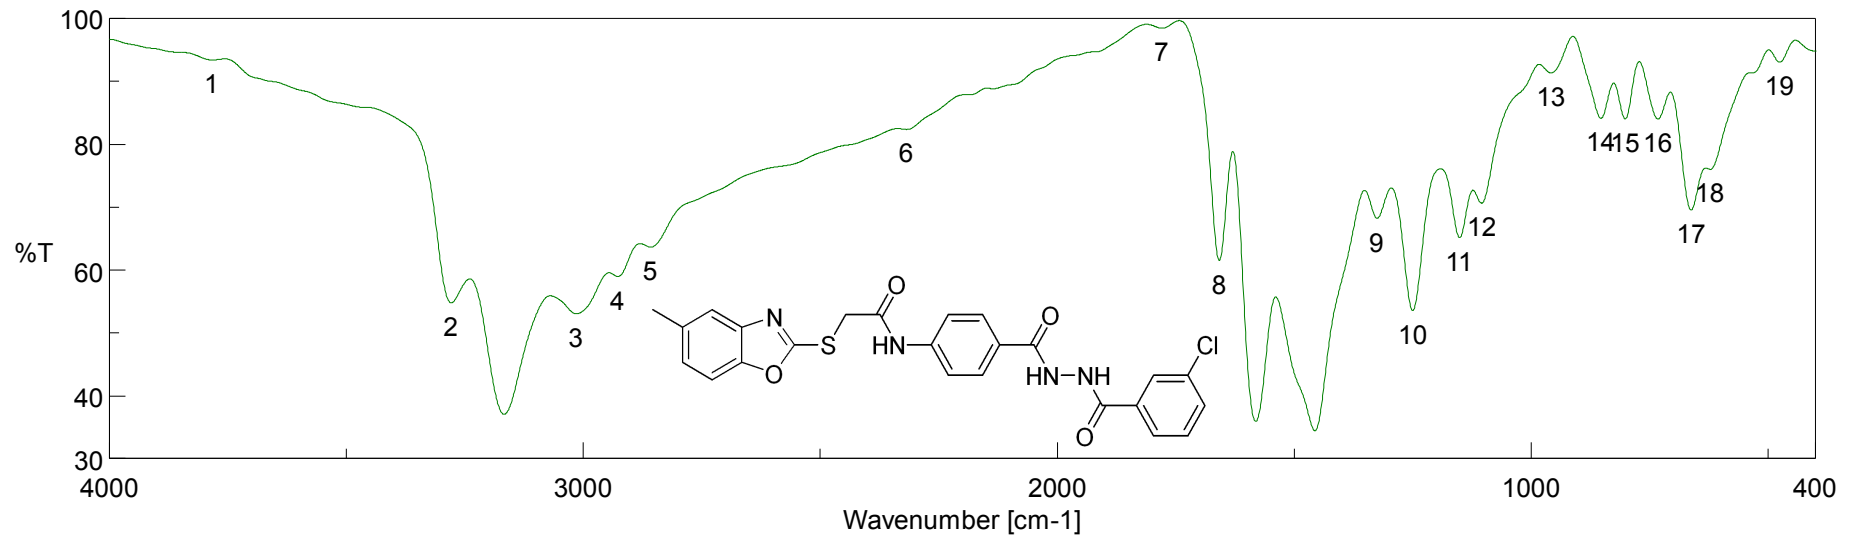

[ Result of Peak Picking ]

| No. | Position | Intensity | No. | Position | Intensity | No. | Position | Intensity | No. | Position | Intensity |
|-----|----------|-----------|-----|----------|-----------|-----|----------|-----------|-----|----------|-----------|
| 1   | 3784.62  | 93.3564   | 2   | 3279.36  | 54.7318   | 3   | 3015.16  | 52.9912   | 4   | 2927.41  | 58.9292   |
| 5   | 2857.99  | 63.6048   | 6   | 2318.02  | 82.3079   | 7   | 1779.01  | 98.4079   | 8   | 1657.52  | 61.4531   |
| 9   | 1324.86  | 68.1845   | 10  | 1249.65  | 53.495    | 11  | 1150.33  | 65.1047   | 12  | 1104.05  | 70.5942   |
| 13  | 957.484  | 91.281    | 14  | 852.382  | 84.1031   | 15  | 801.278  | 83.9659   | 16  | 731.853  | 83.954    |
| 17  | 662.428  | 69.4879   | 18  | 621.931  | 75.9664   | 19  | 475.367  | 93.0056   |     |          |           |

# <sup>1</sup>H NMR of 13c

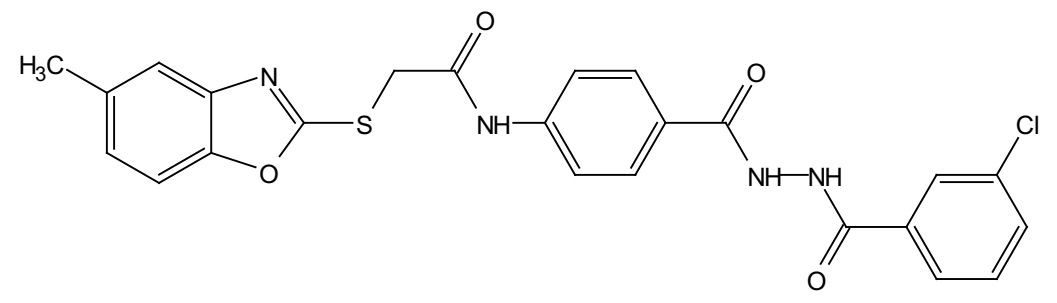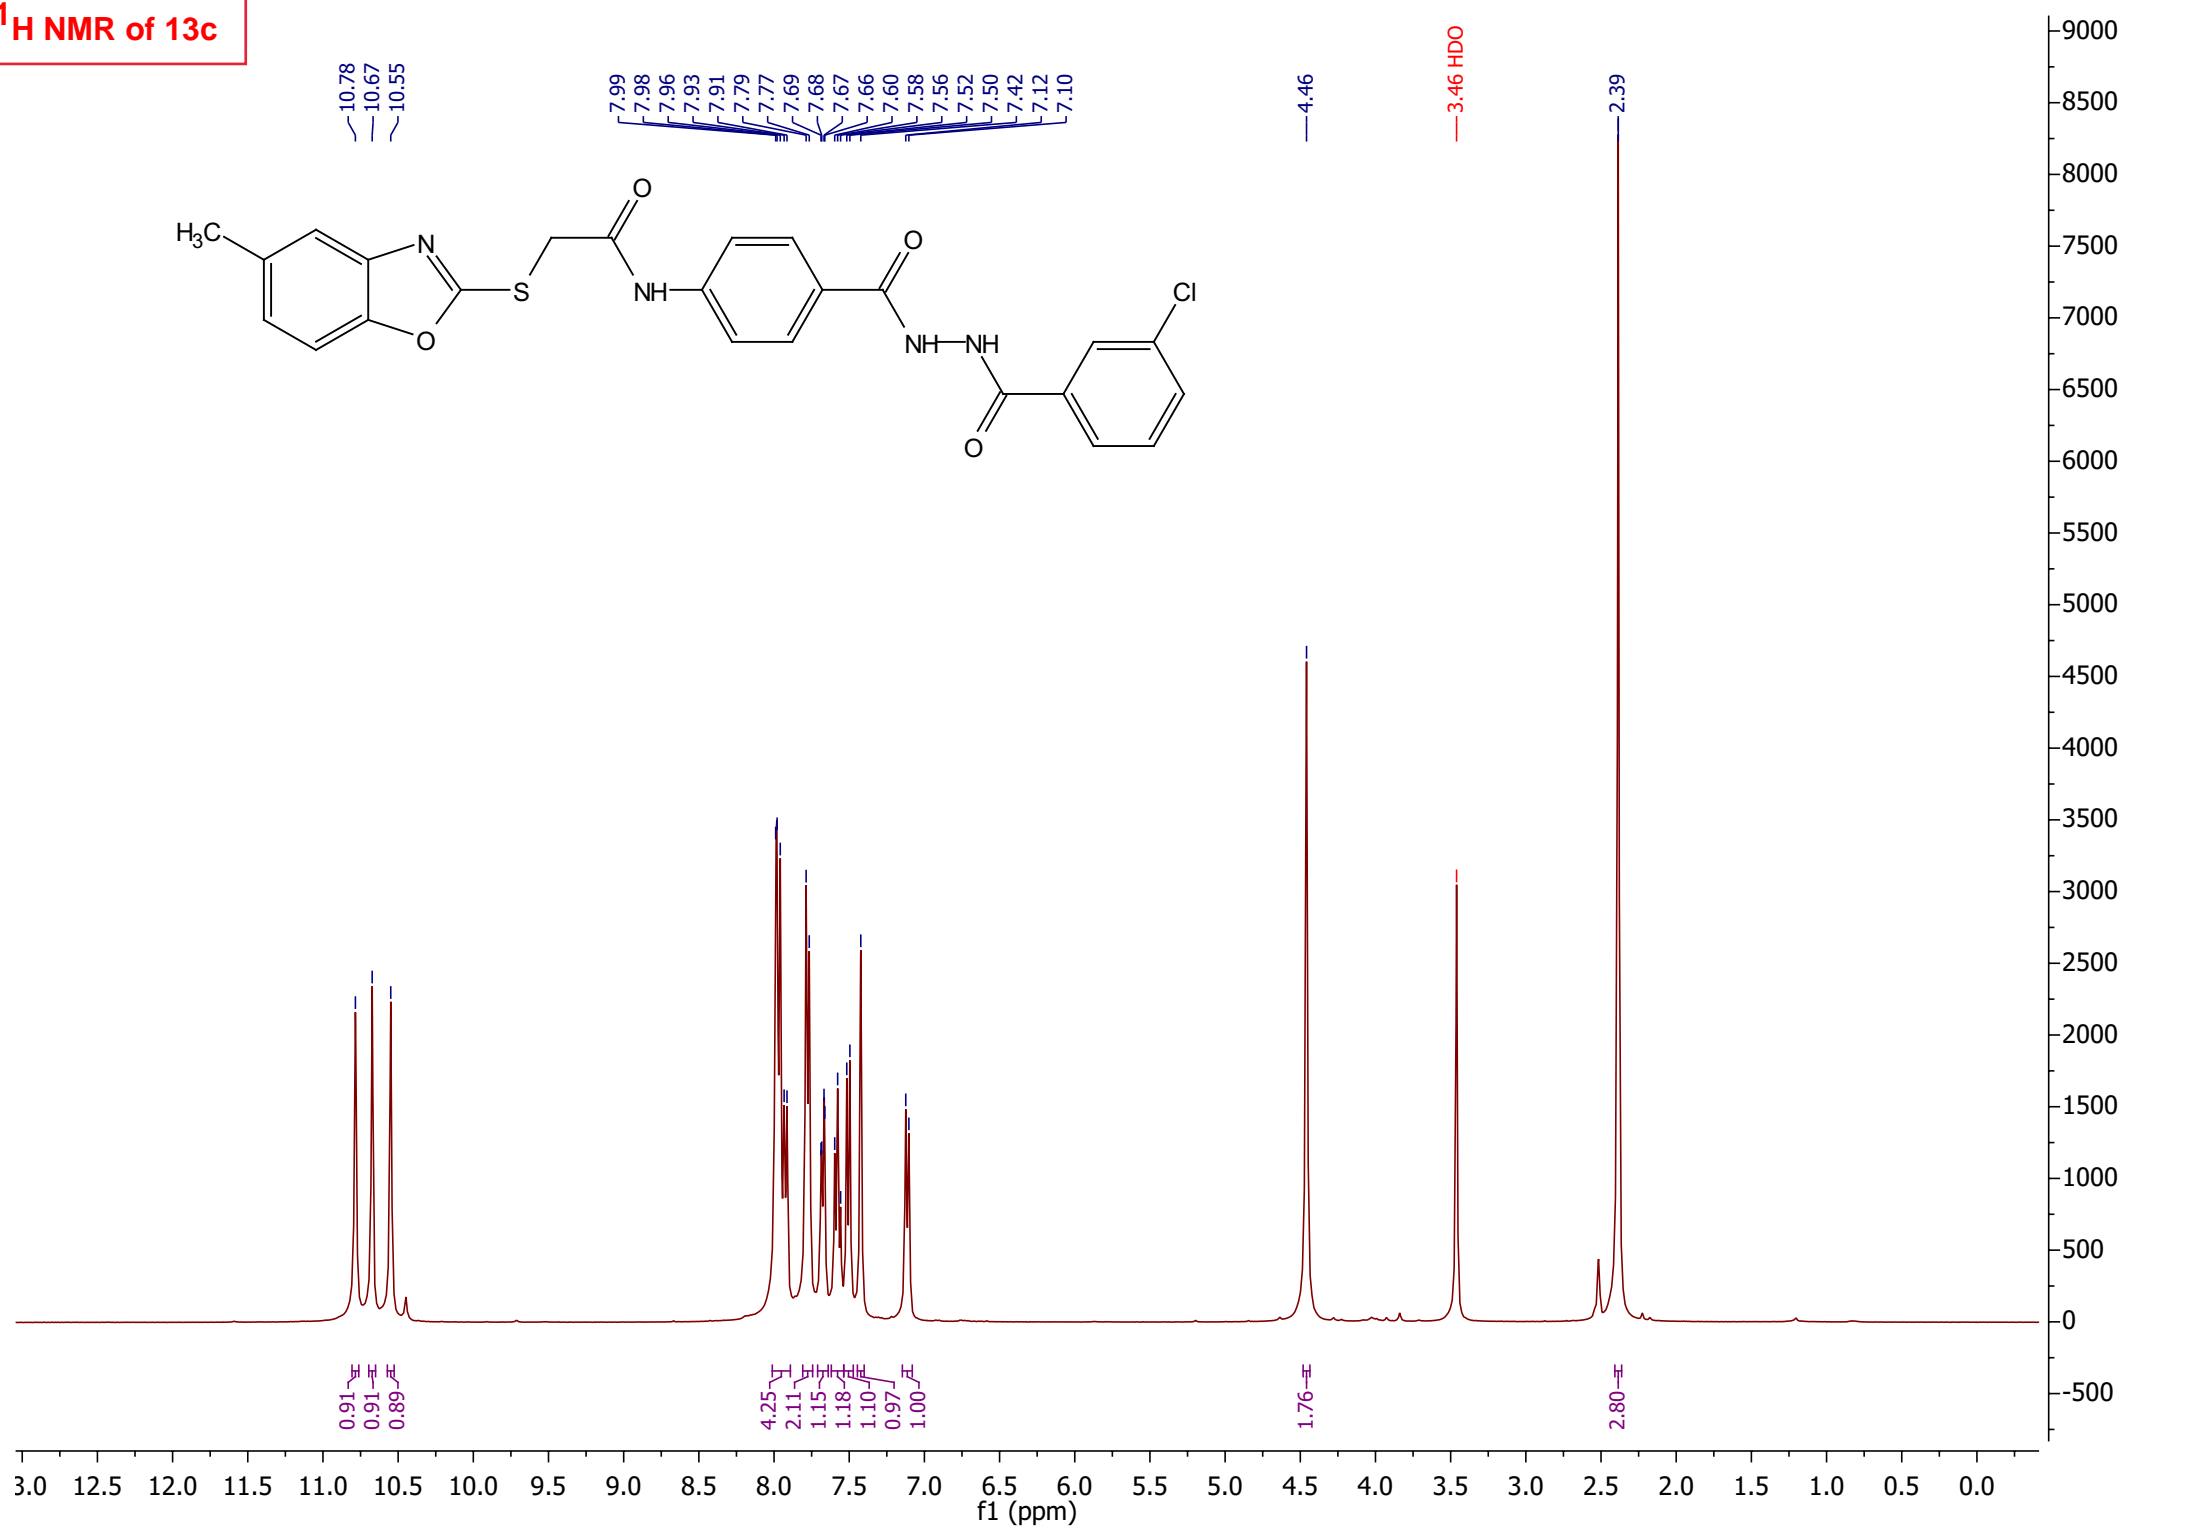

**<sup>1</sup>H NMR of 13c**



4.46

3.46 H<sub>2</sub>O

2.39

1.76

2.80

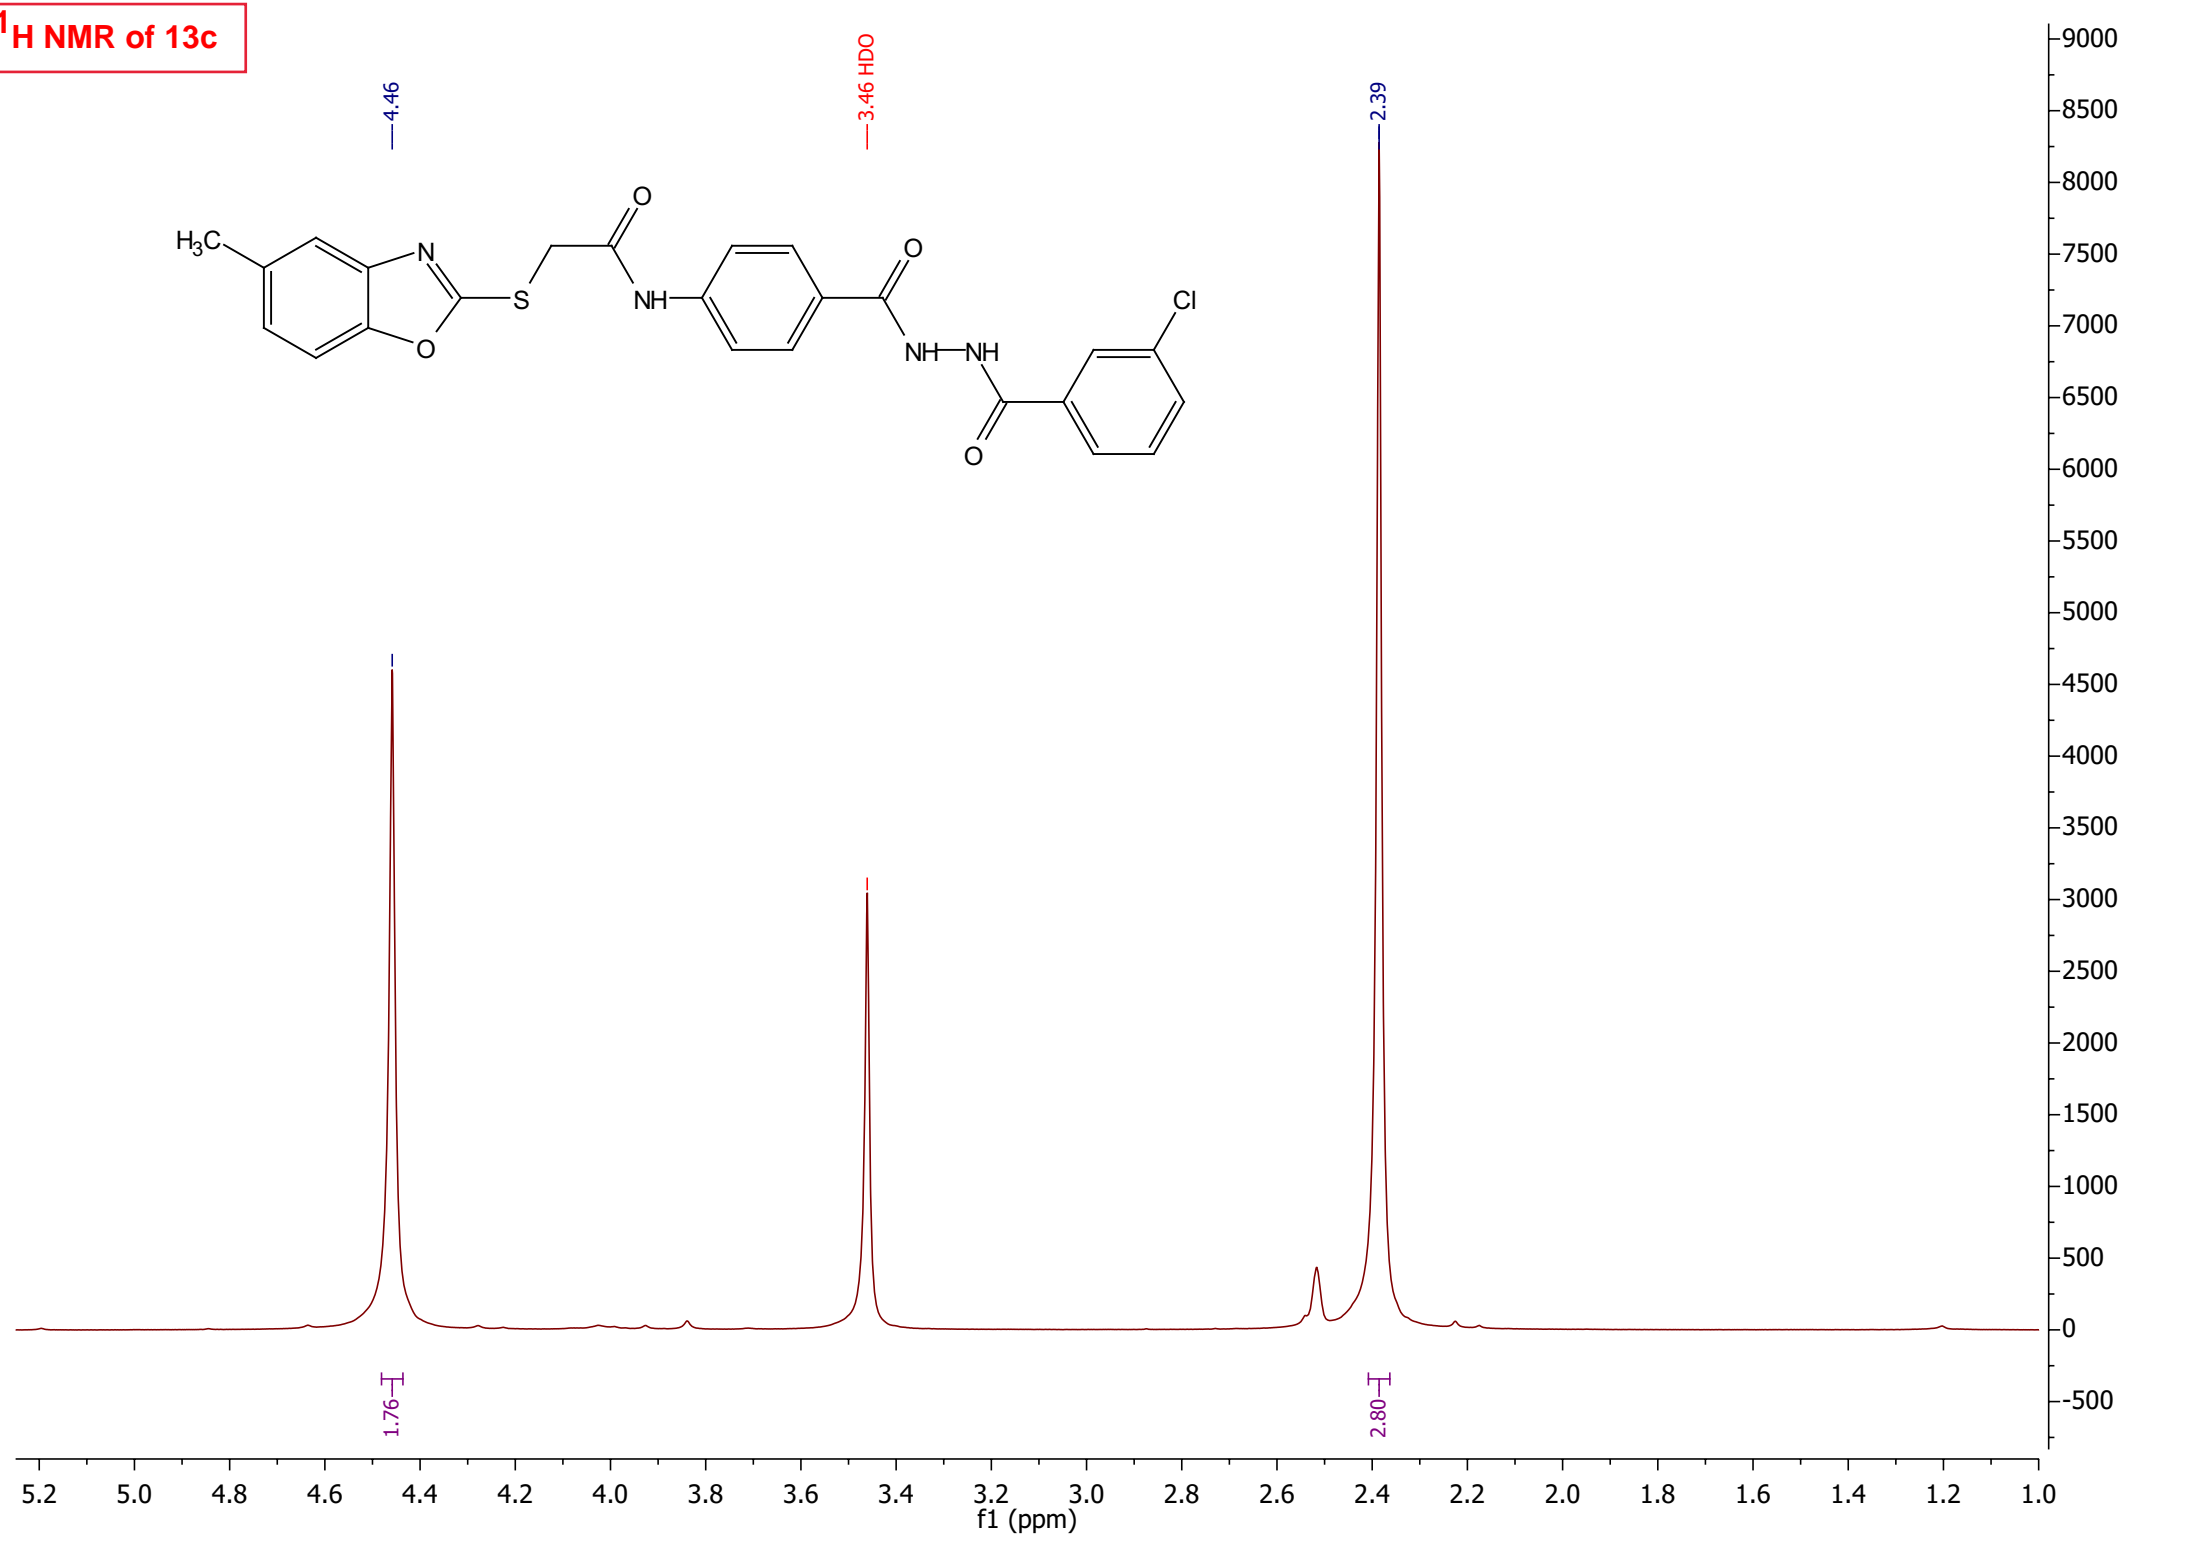

# <sup>1</sup>H NMR of 13c

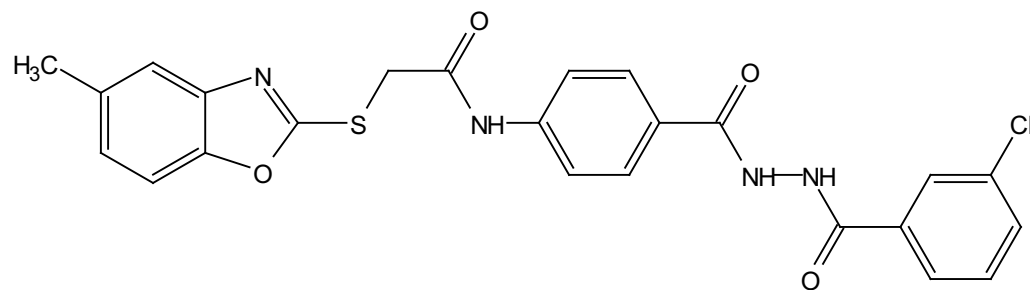

7.99  
7.98  
7.96  
7.93  
7.91

7.79  
7.77

7.69  
7.68  
7.67  
7.66

7.60  
7.58  
7.56

7.52  
7.50

7.42

7.12  
7.10

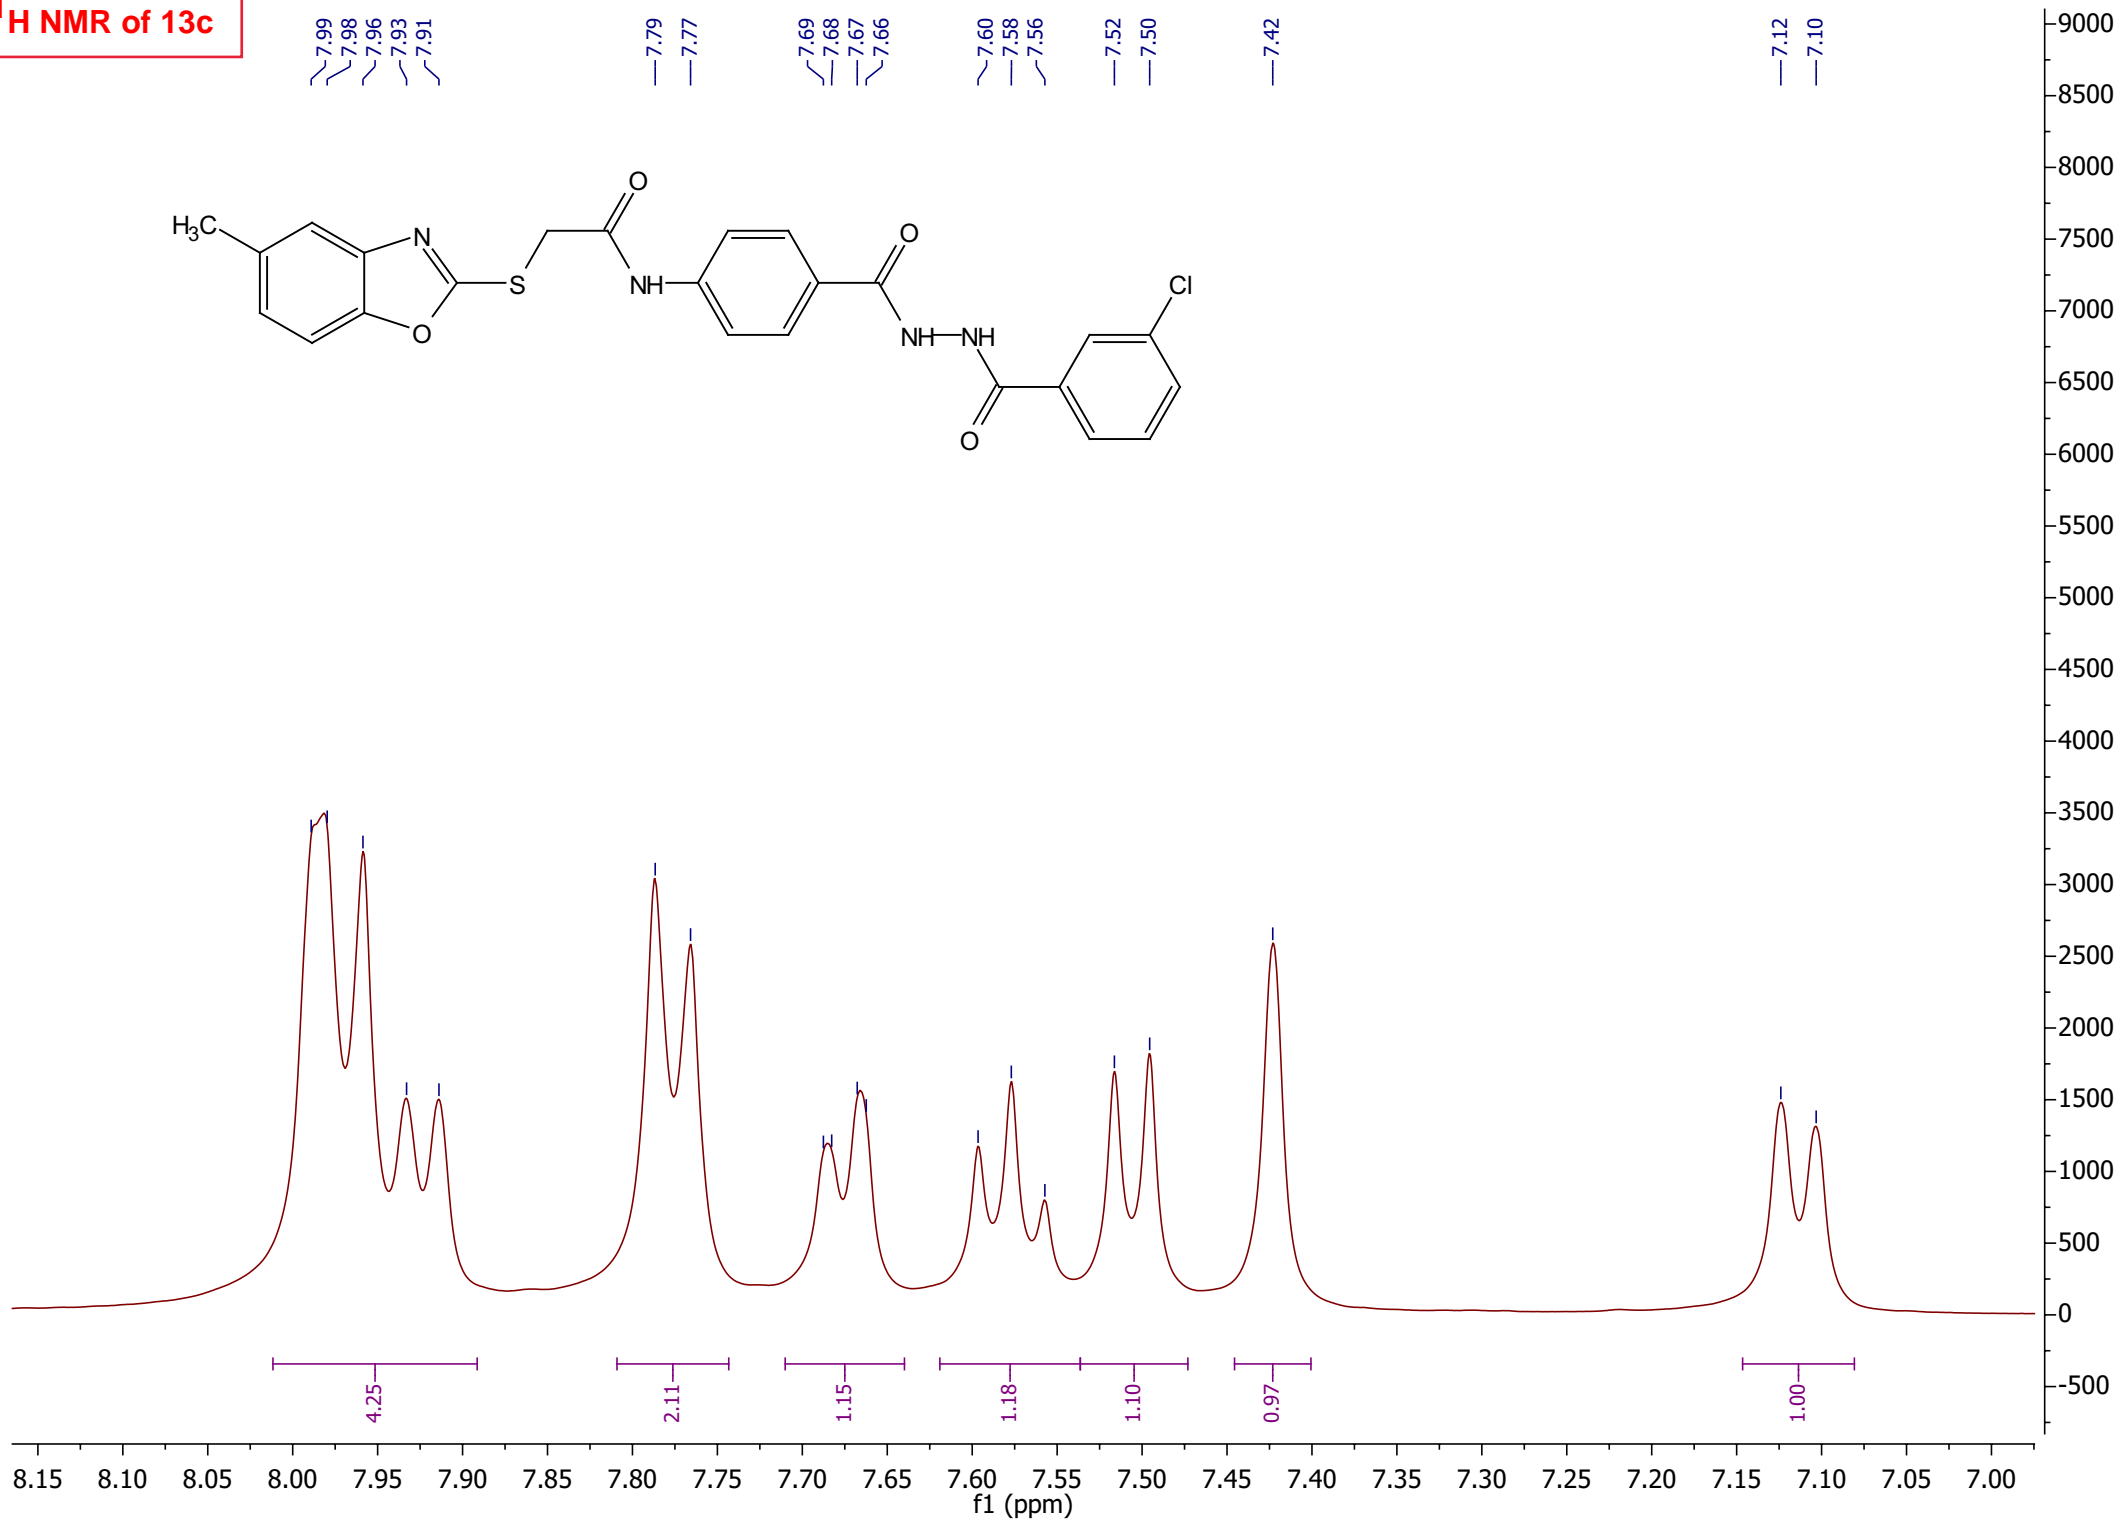

**<sup>1</sup>H NMR of 13c**



10.78

10.67

10.55

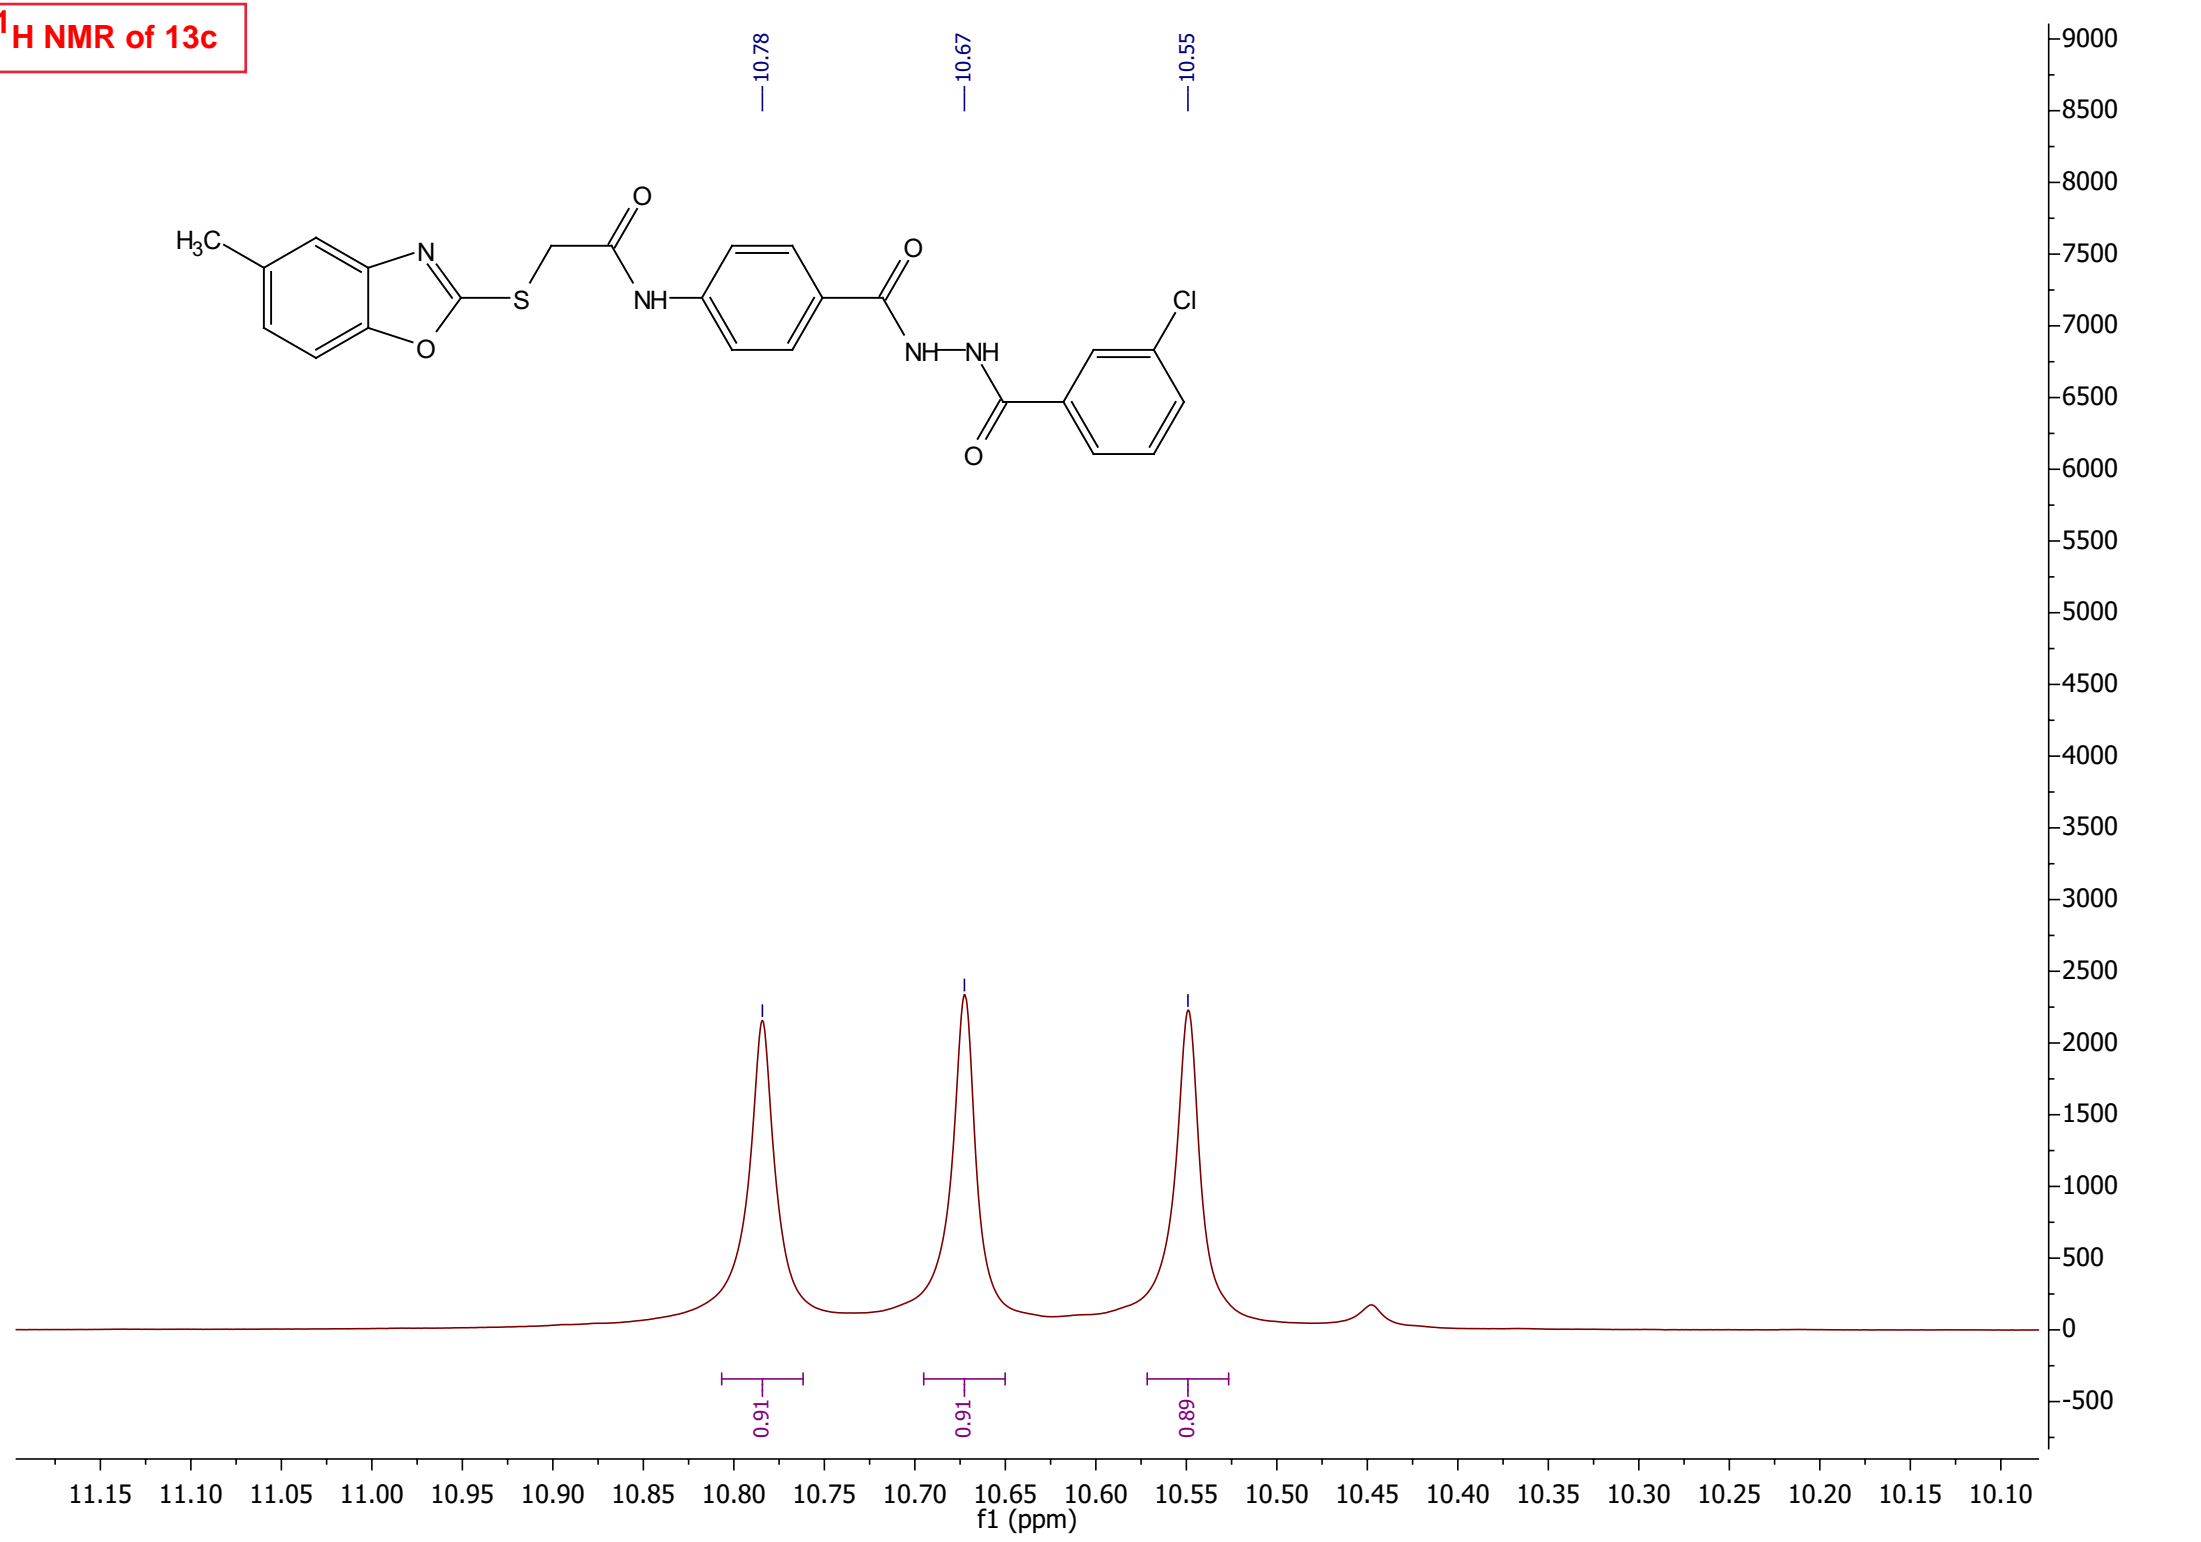



# <sup>13</sup>C NMR of 13c



- 166.05
- 165.76
- 165.07
- 164.16
- 150.10
- 142.41
- 141.89
- 135.00
- 134.55
- 133.89
- 131.05
- 129.08
- 127.77
- 126.66
- 125.62
- 119.02
- 110.05

- 40.57 DMSO
- 40.36 DMSO
- 40.16 DMSO
- 39.95 DMSO
- 39.74 DMSO
- 39.53 DMSO
- 39.32 DMSO
- 37.32

- 21.39

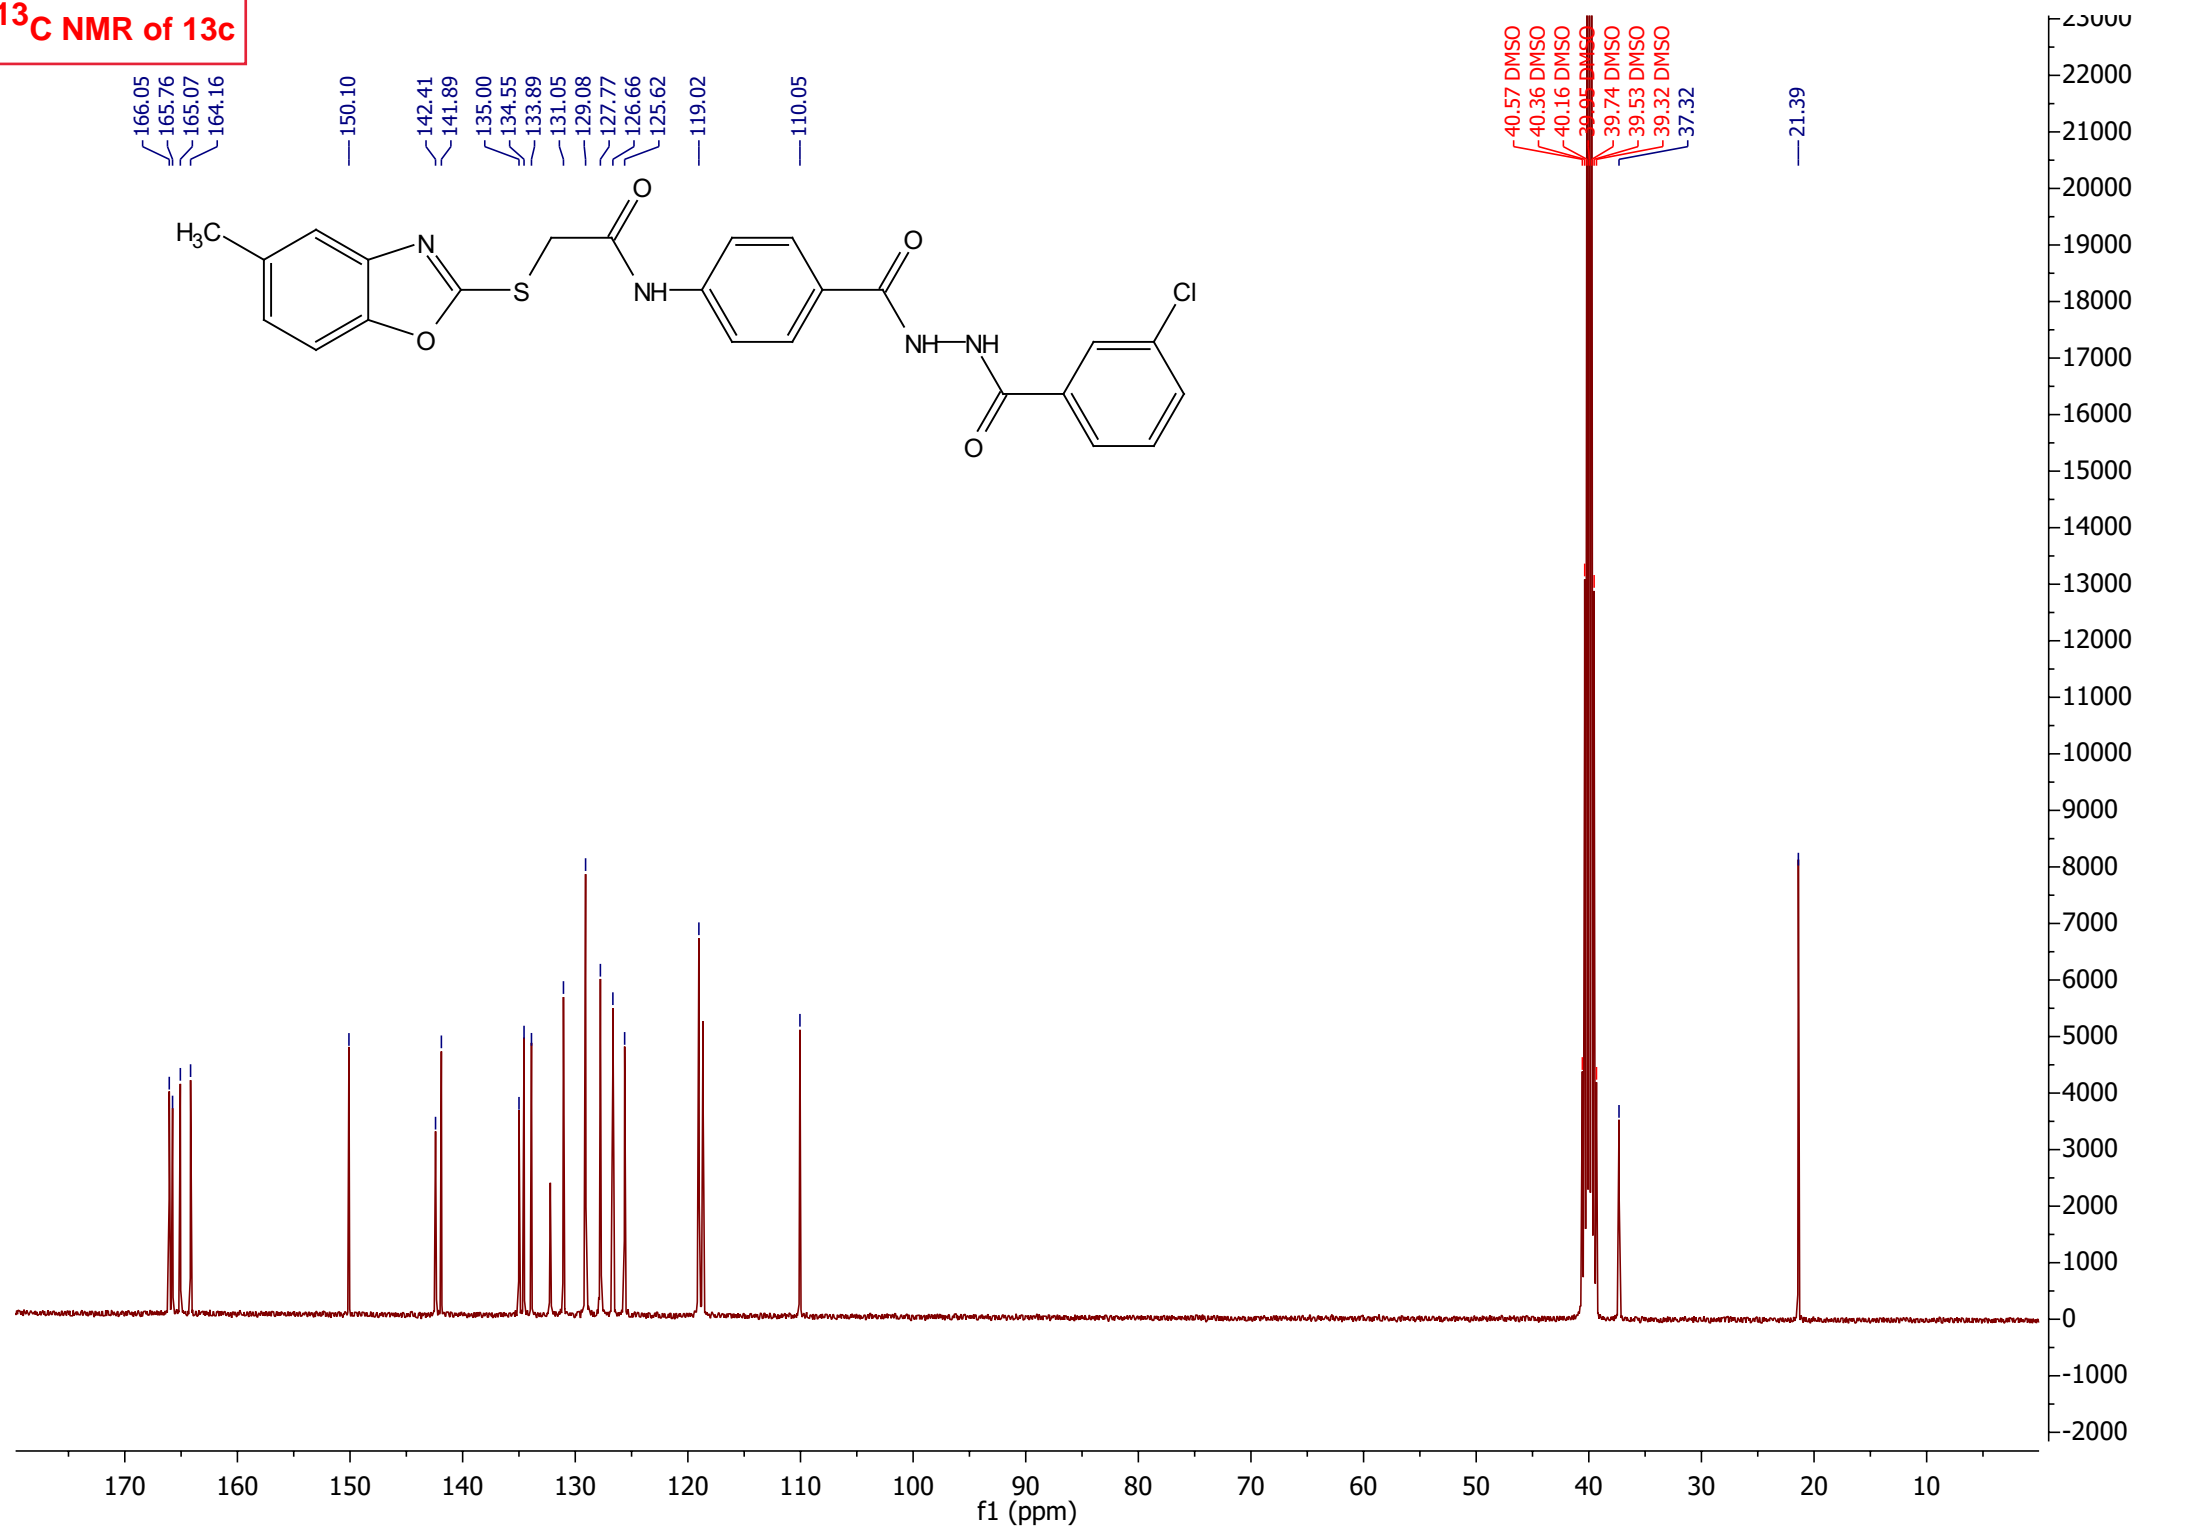

**<sup>13</sup>C NMR of 13c**

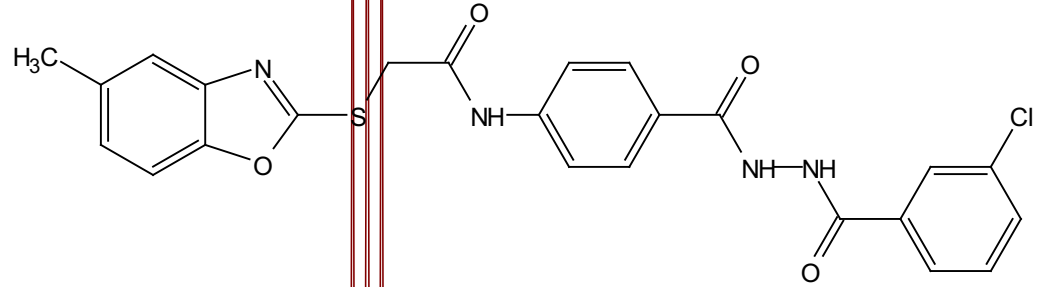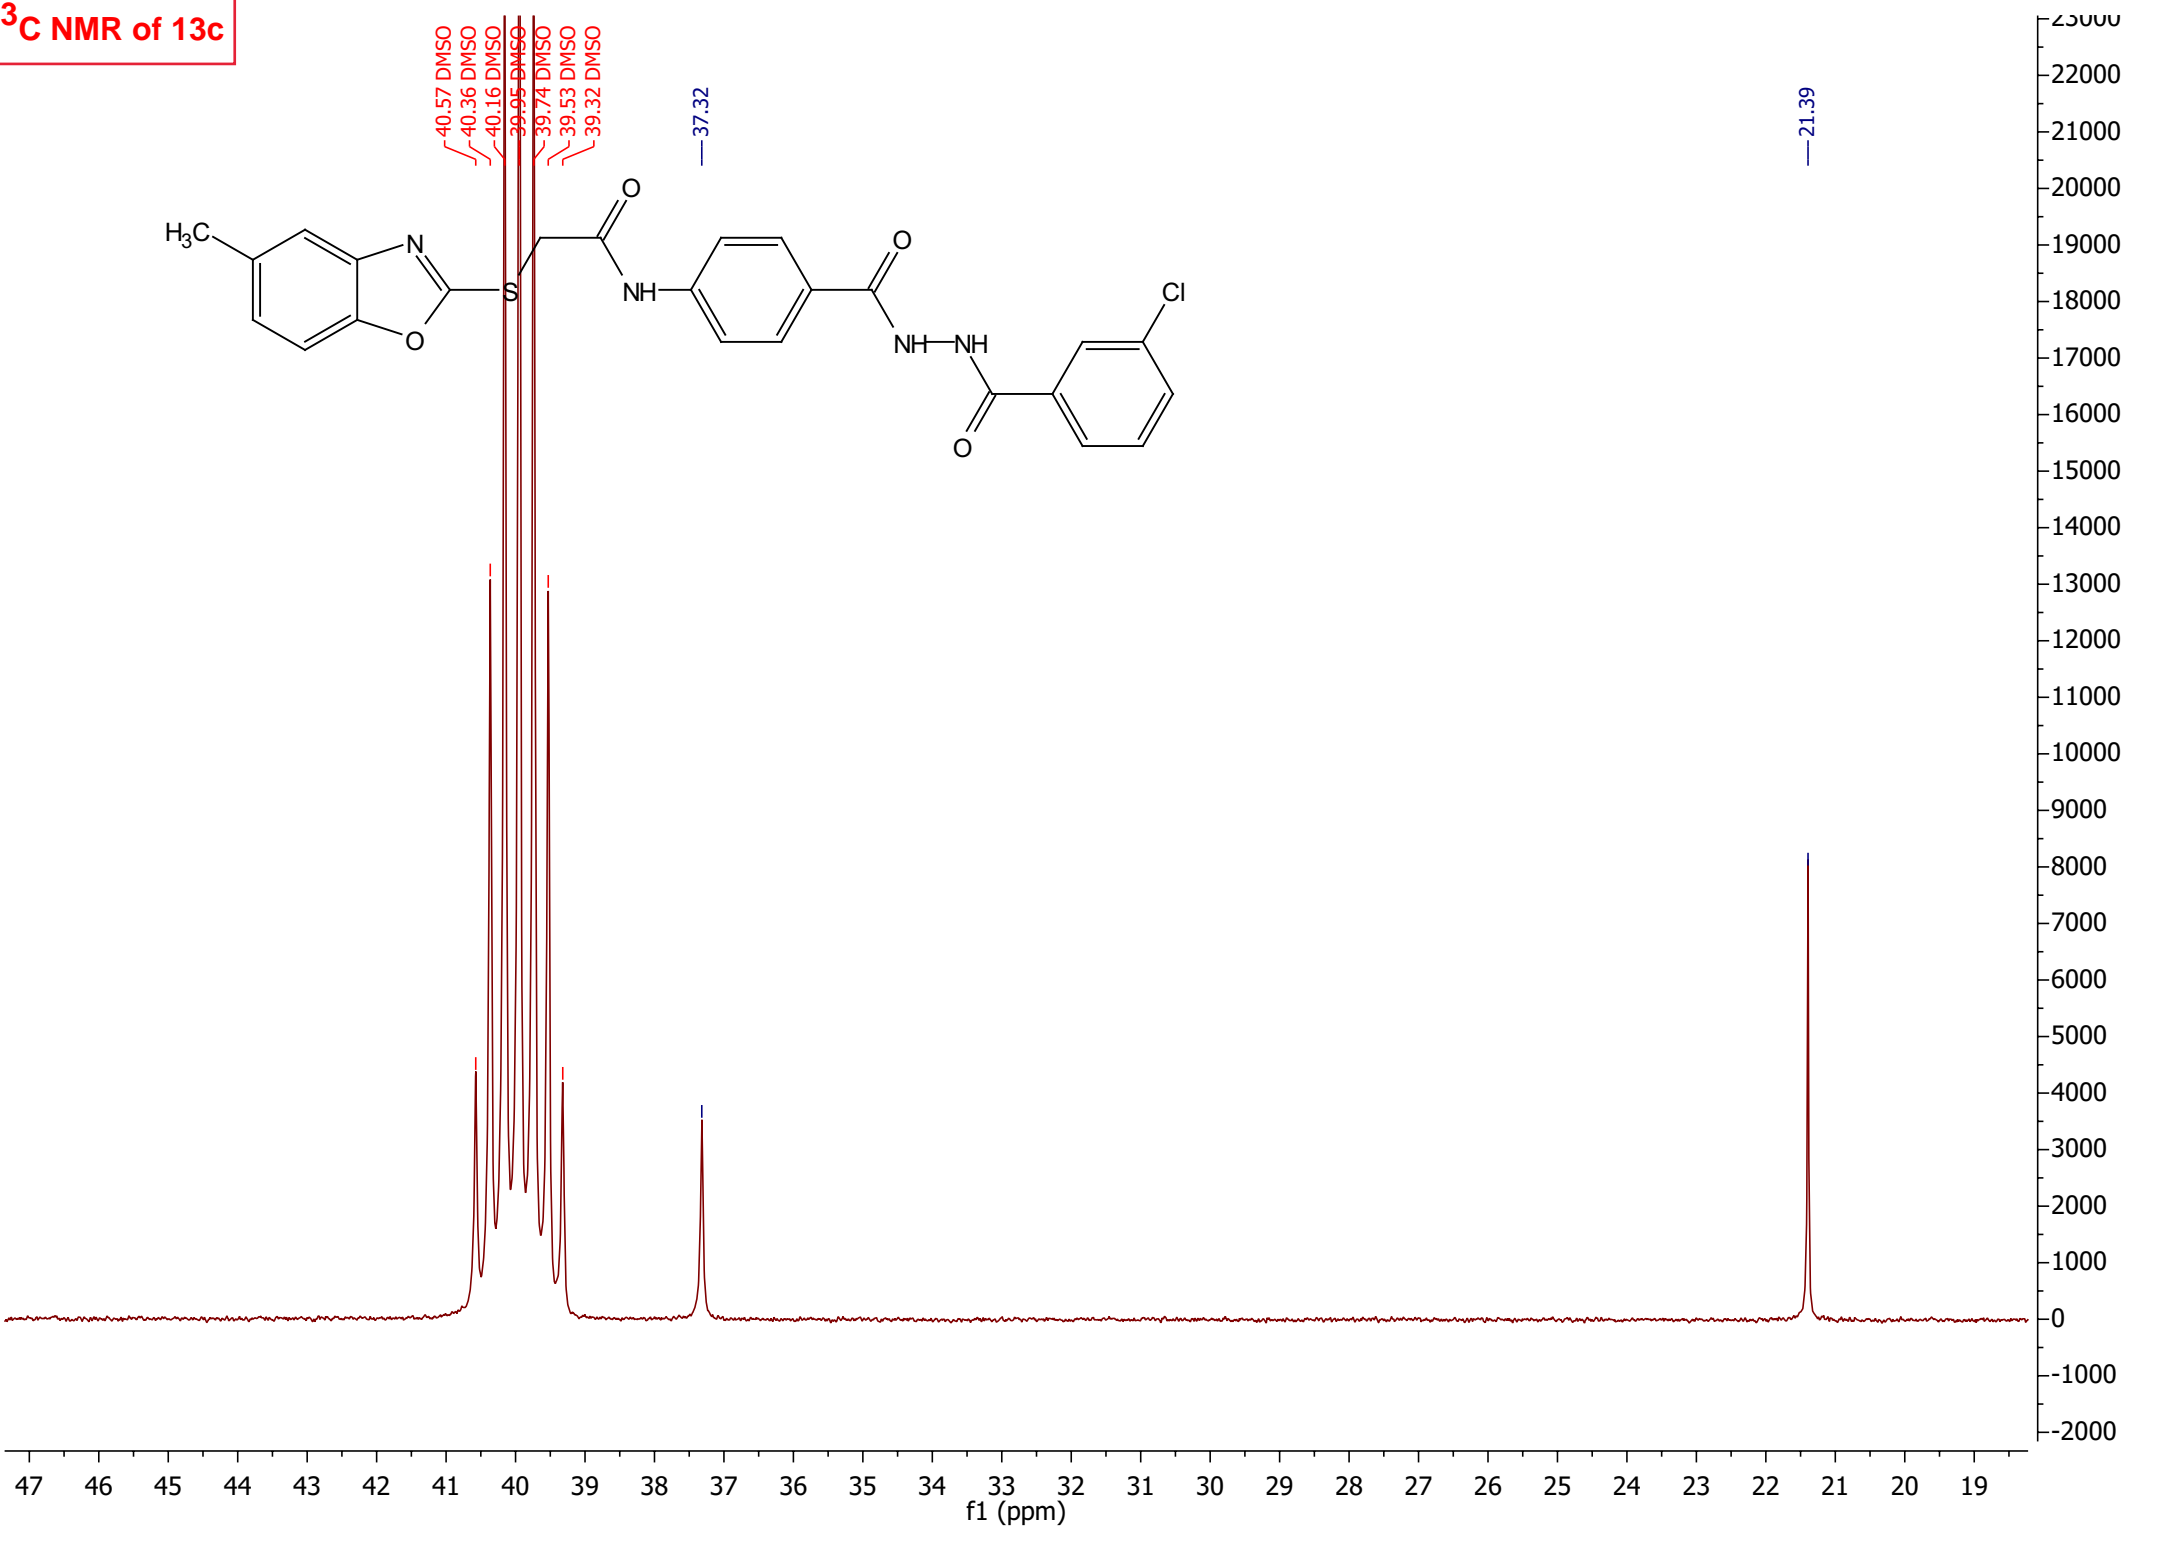

# <sup>13</sup>C NMR of 13c

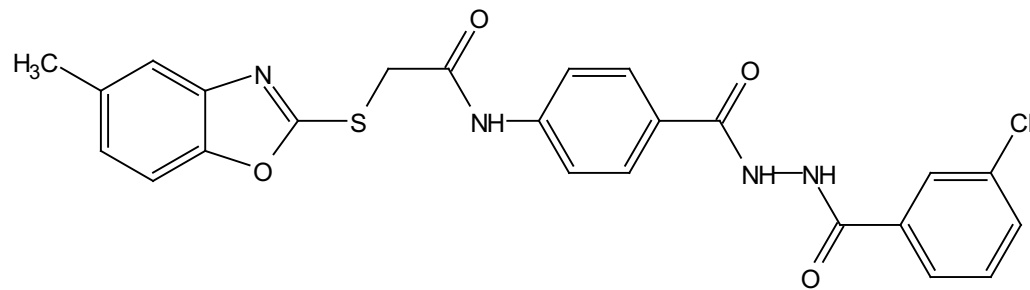

166.05  
165.76  
165.07  
164.16

150.10

142.41  
141.89

135.00  
134.55  
133.89

131.05

129.08  
127.77  
126.66  
125.62

119.02

110.05

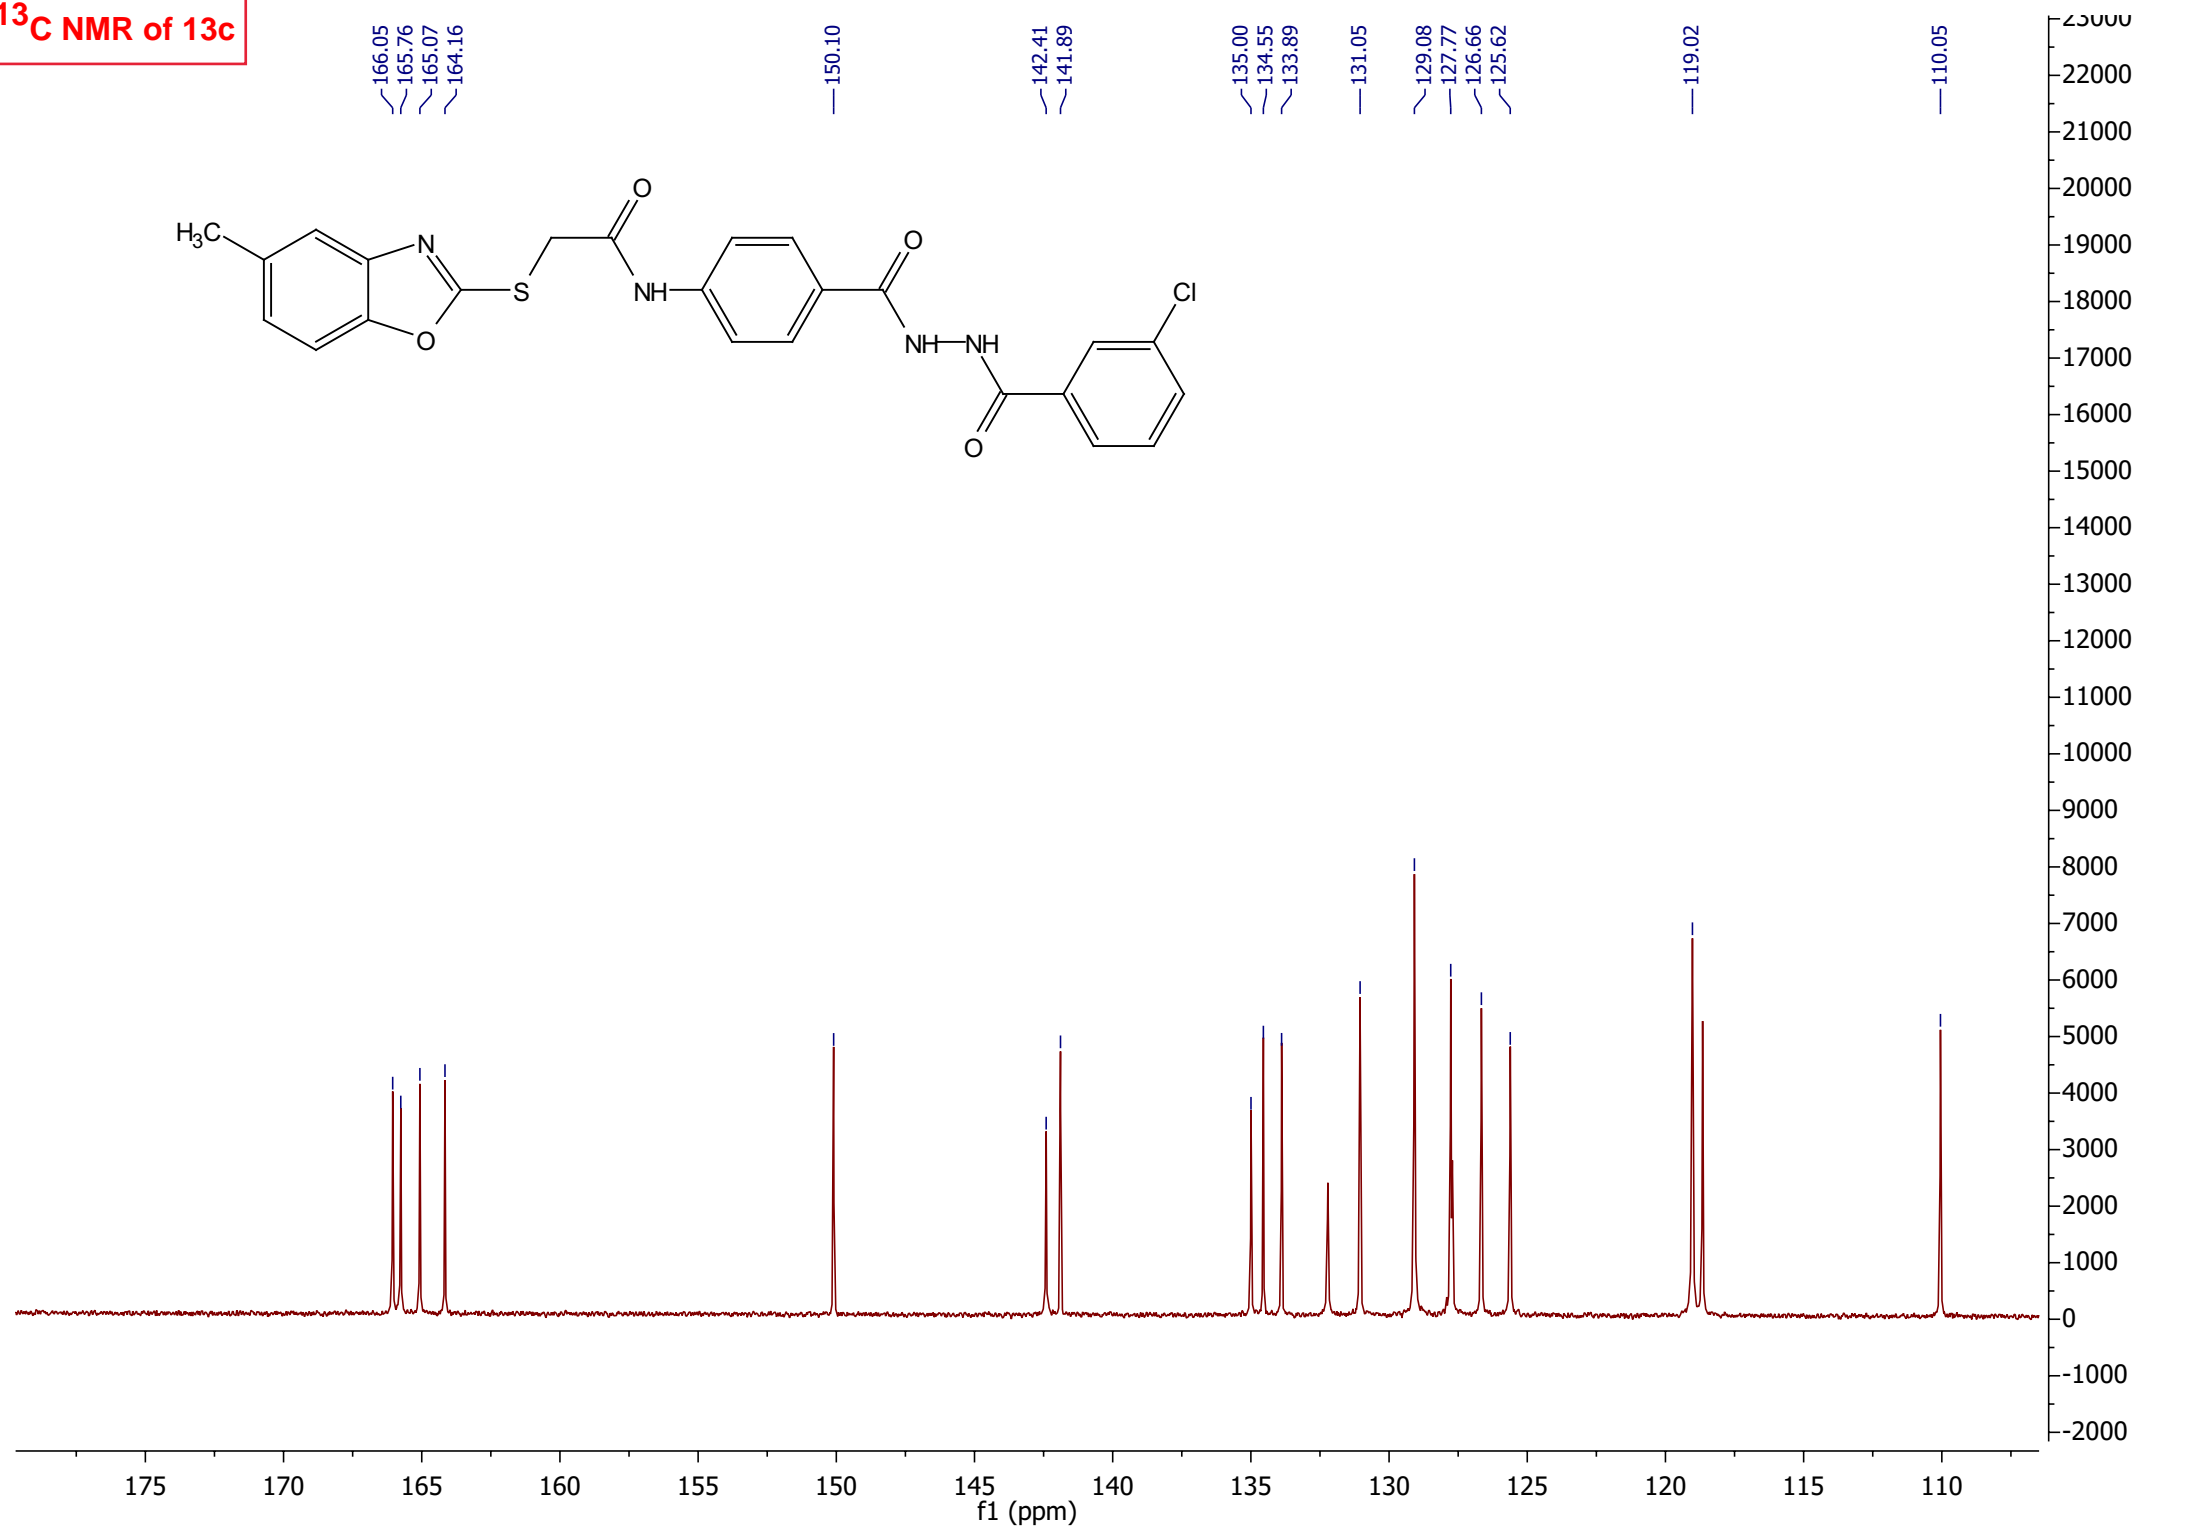

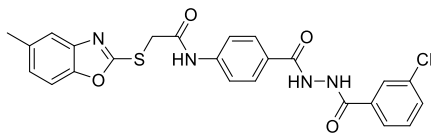

Mass spec. of 13c

RT: 0.00 - 5.09 SM: 7G

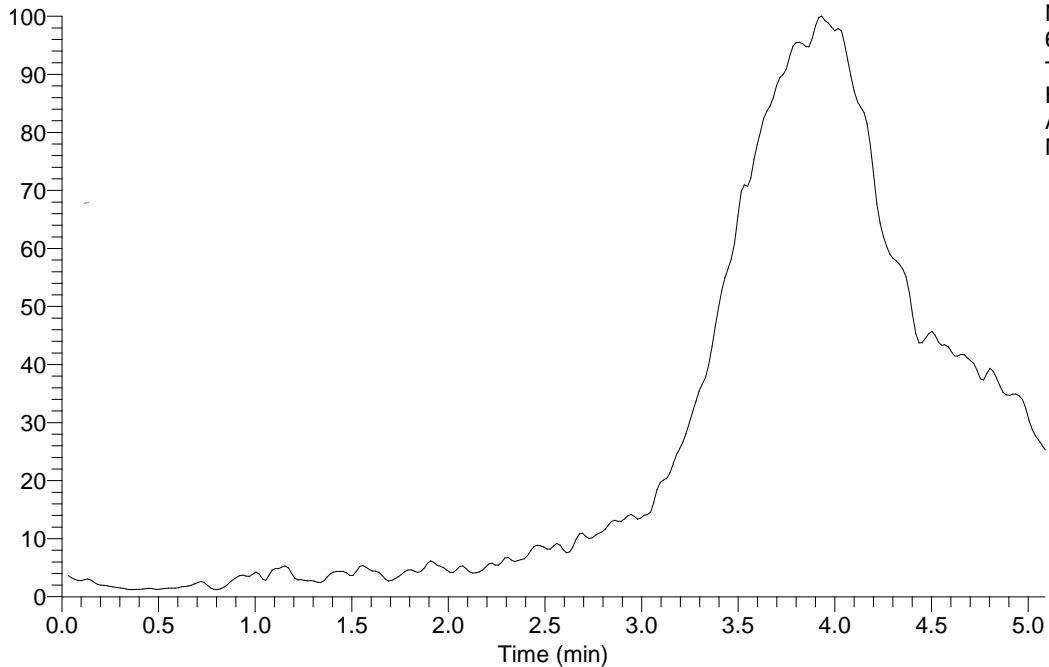

NL:  
6.48E5  
TIC MS  
Hazem-  
Abdelhady-  
MBA54

Hazem-Abdelhady-MBA54 #252 RT: 4.23 AV: 1 NL: 4.03E4  
T: + c EI Full ms [40.00-1000.00]

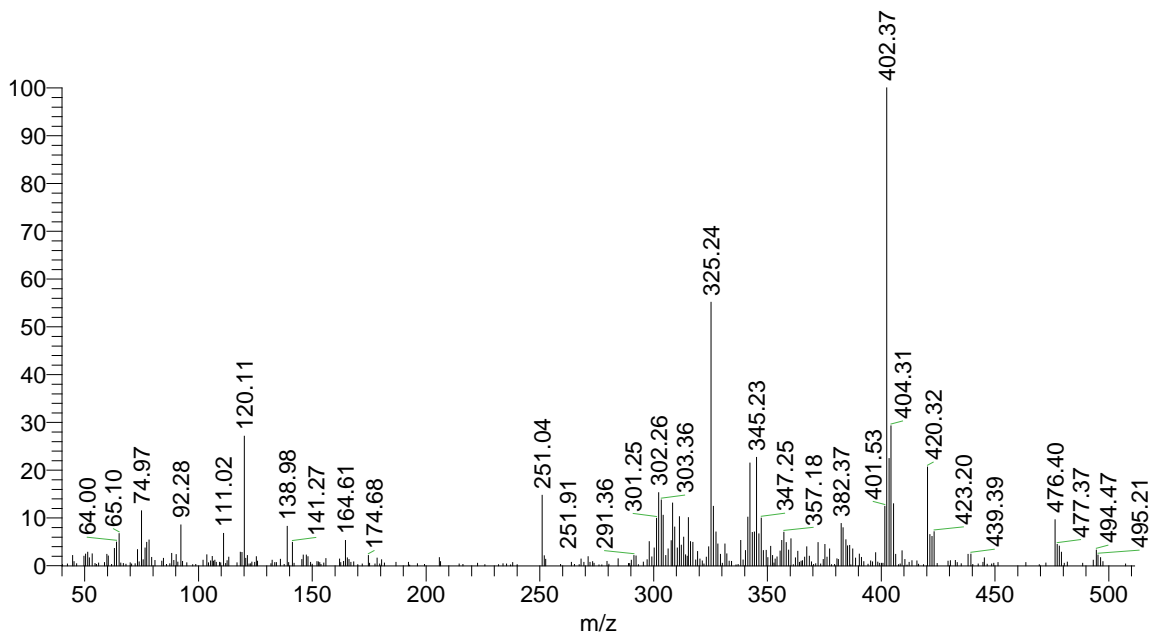

**Raw data of the cytotoxicity of the synthesized  
compounds against HepG2 and MCF-7 cell  
lines**

## Cytotoxicity of 12a against HepG2 cell line

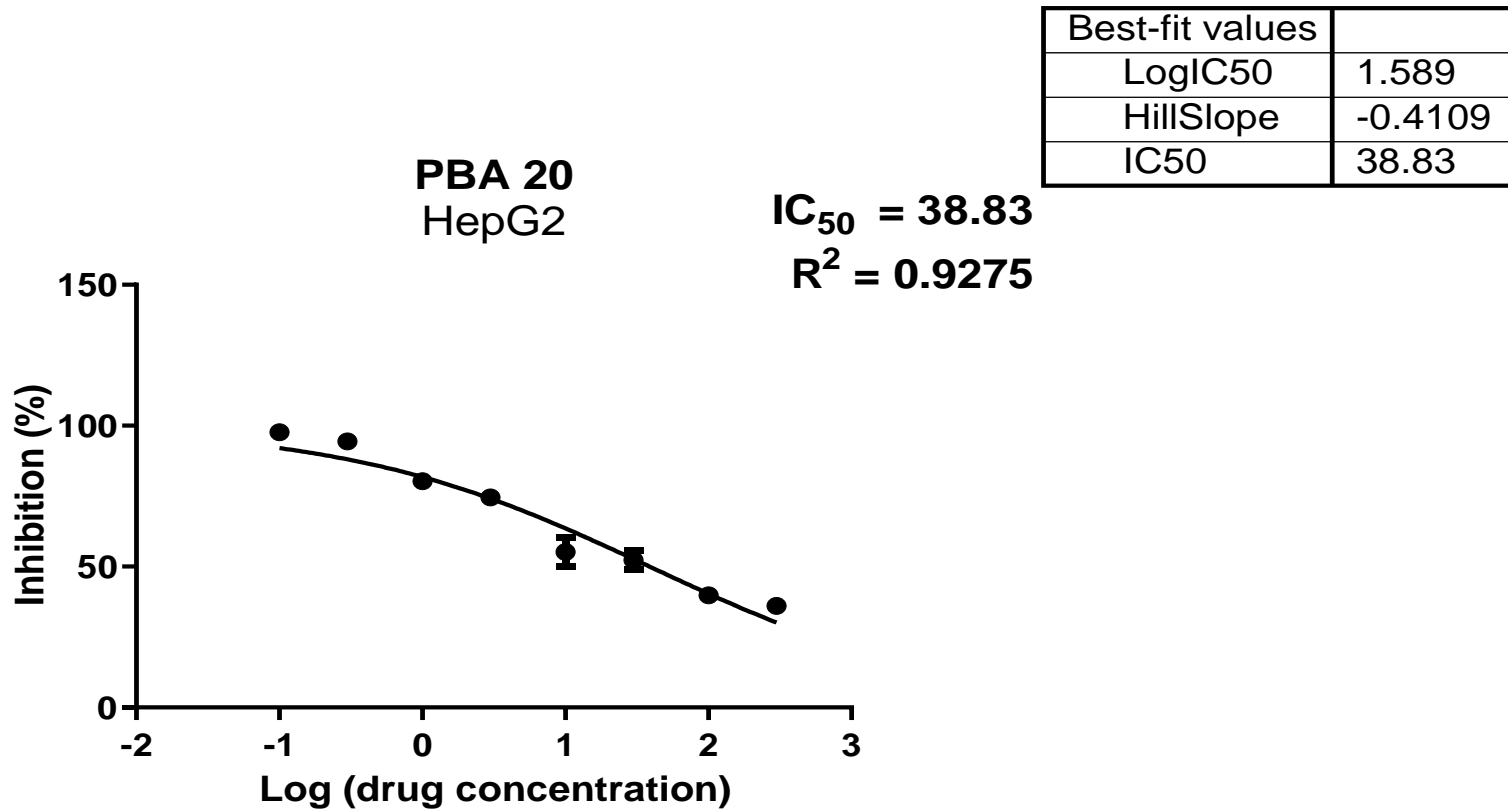

## Cytotoxicity of 12b against HepG2 cell line

| Best-fit values |         |
|-----------------|---------|
| LogIC50         | 1.807   |
| HillSlope       | -0.4183 |
| IC50            | 64.16   |

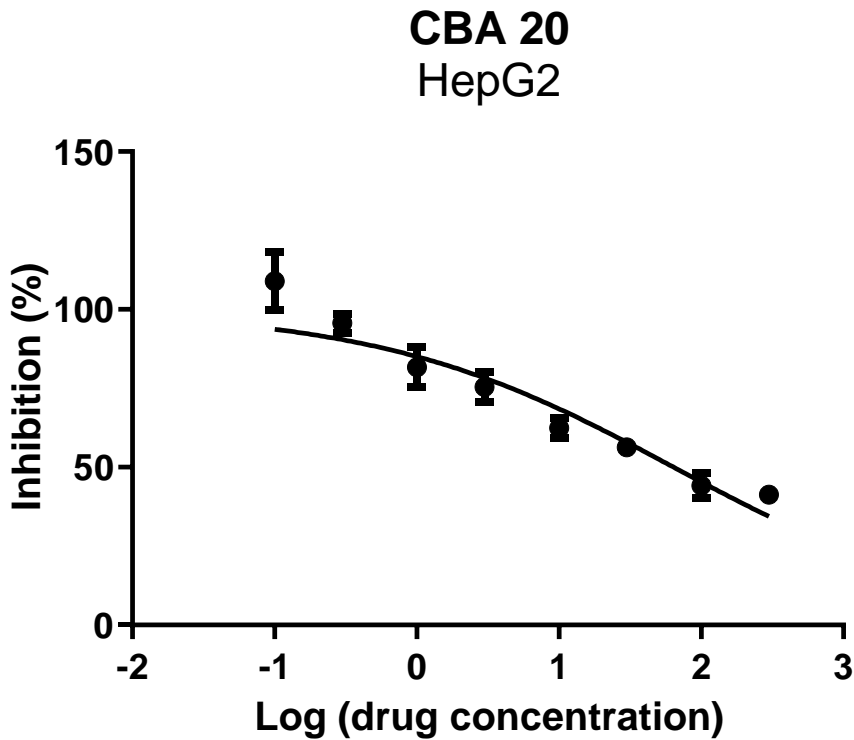

## Cytotoxicity of 12c against HepG2 cell line

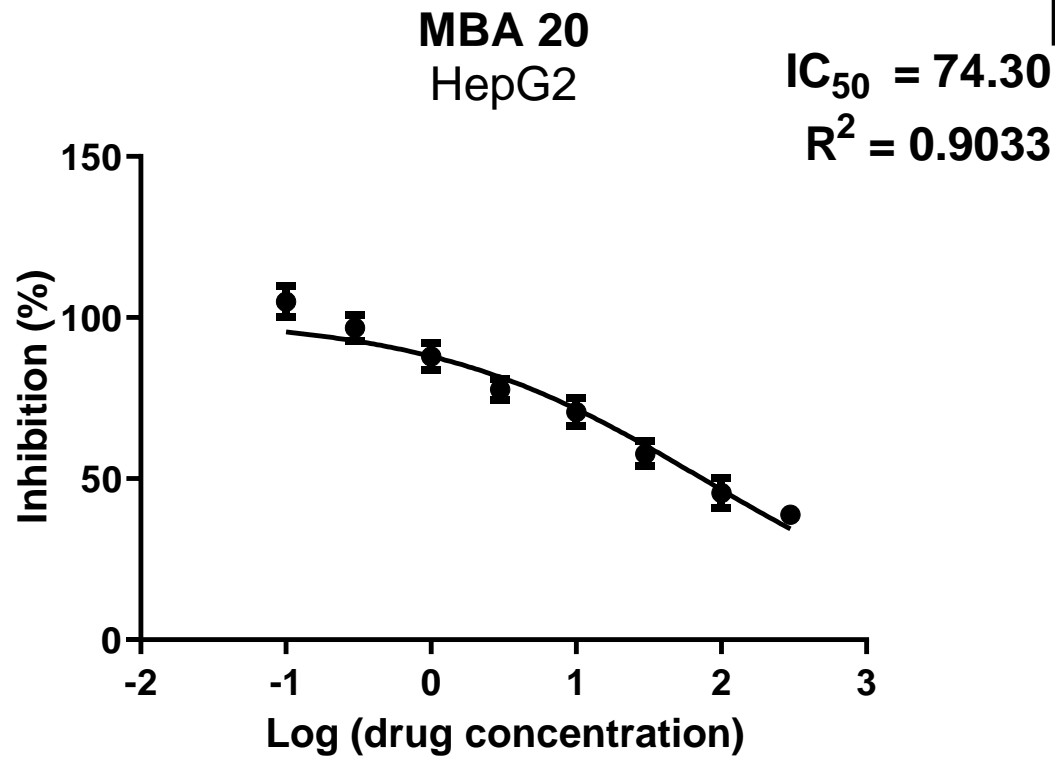

| Best-fit values |         |
|-----------------|---------|
| LogIC50         | 1.871   |
| HillSlope       | -0.4624 |
| IC50            | 74.30   |



## Cytotoxicity of 12d against HepG2 cell line

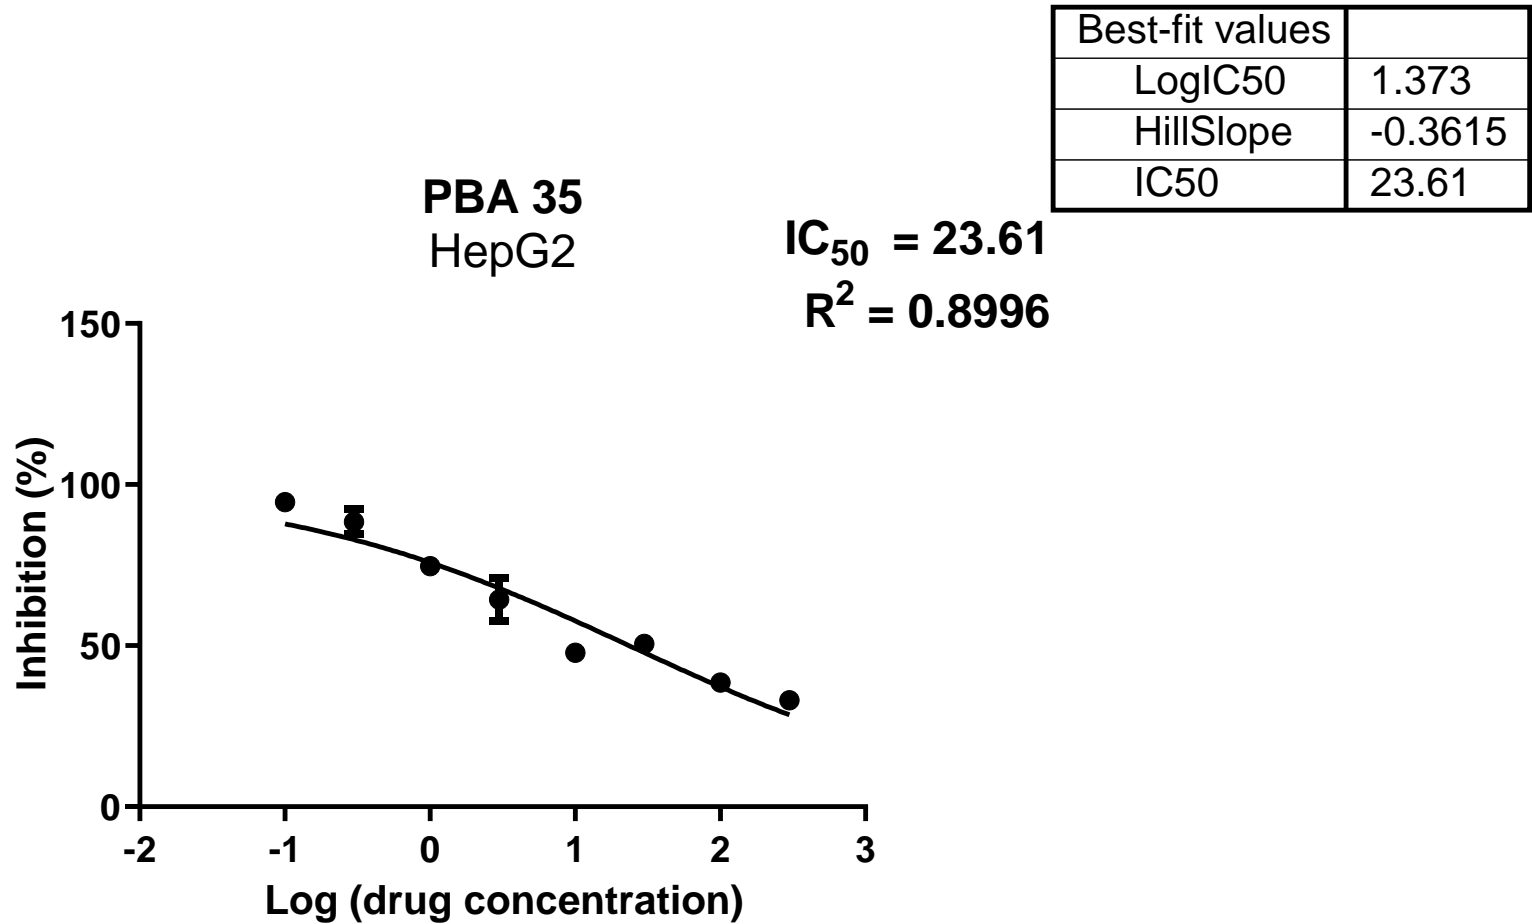

## Cytotoxicity of 12e against HepG2 cell line

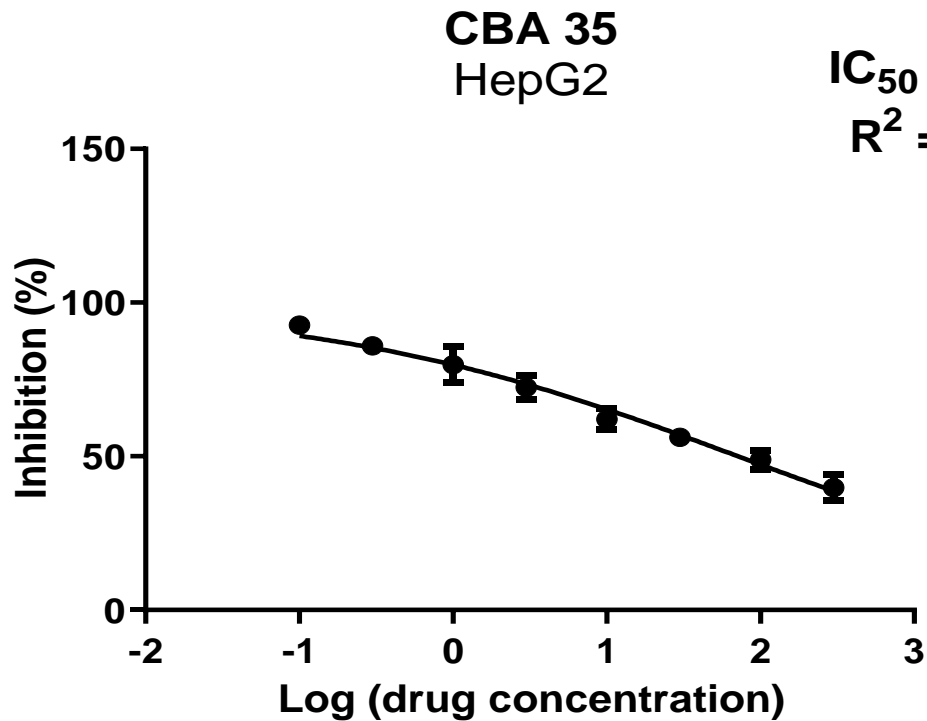

| Best-fit values     |         |
|---------------------|---------|
| LogIC <sub>50</sub> | 1.855   |
| HillSlope           | -0.3212 |
| IC <sub>50</sub>    | 71.59   |

## Cytotoxicity of 12f against HepG2 cell line

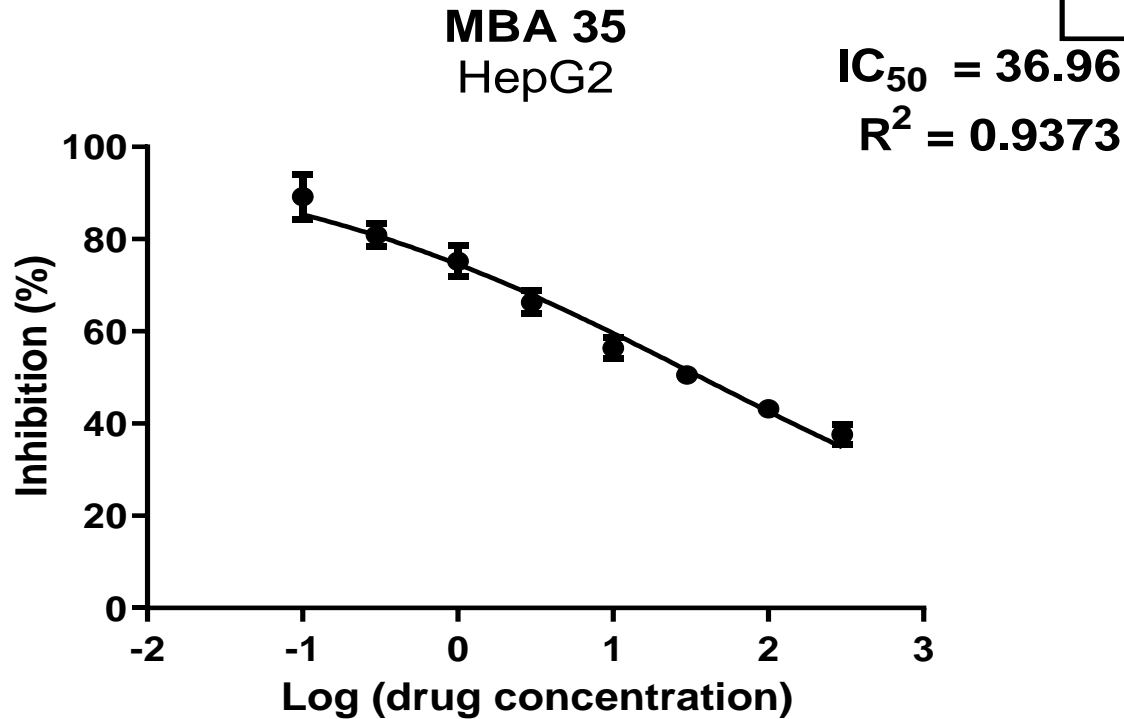

| Best-fit values |         |
|-----------------|---------|
| LogIC50         | 1.568   |
| HillSlope       | -0.2978 |
| IC50            | 36.96   |

## Cytotoxicity of 12g against HepG2 cell line

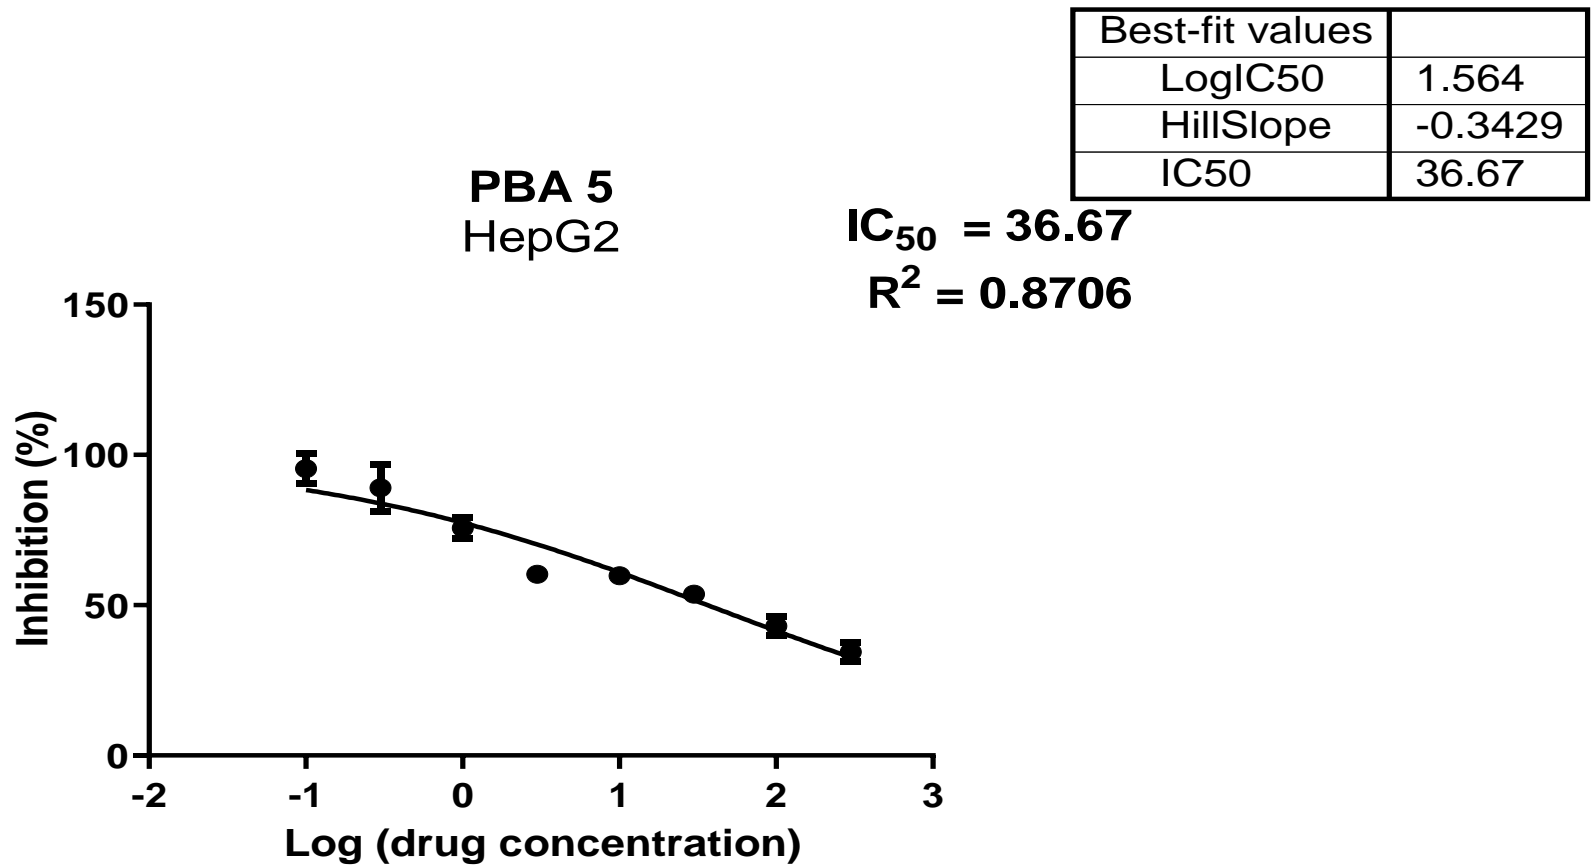

## Cytotoxicity of 12h against HepG2 cell line

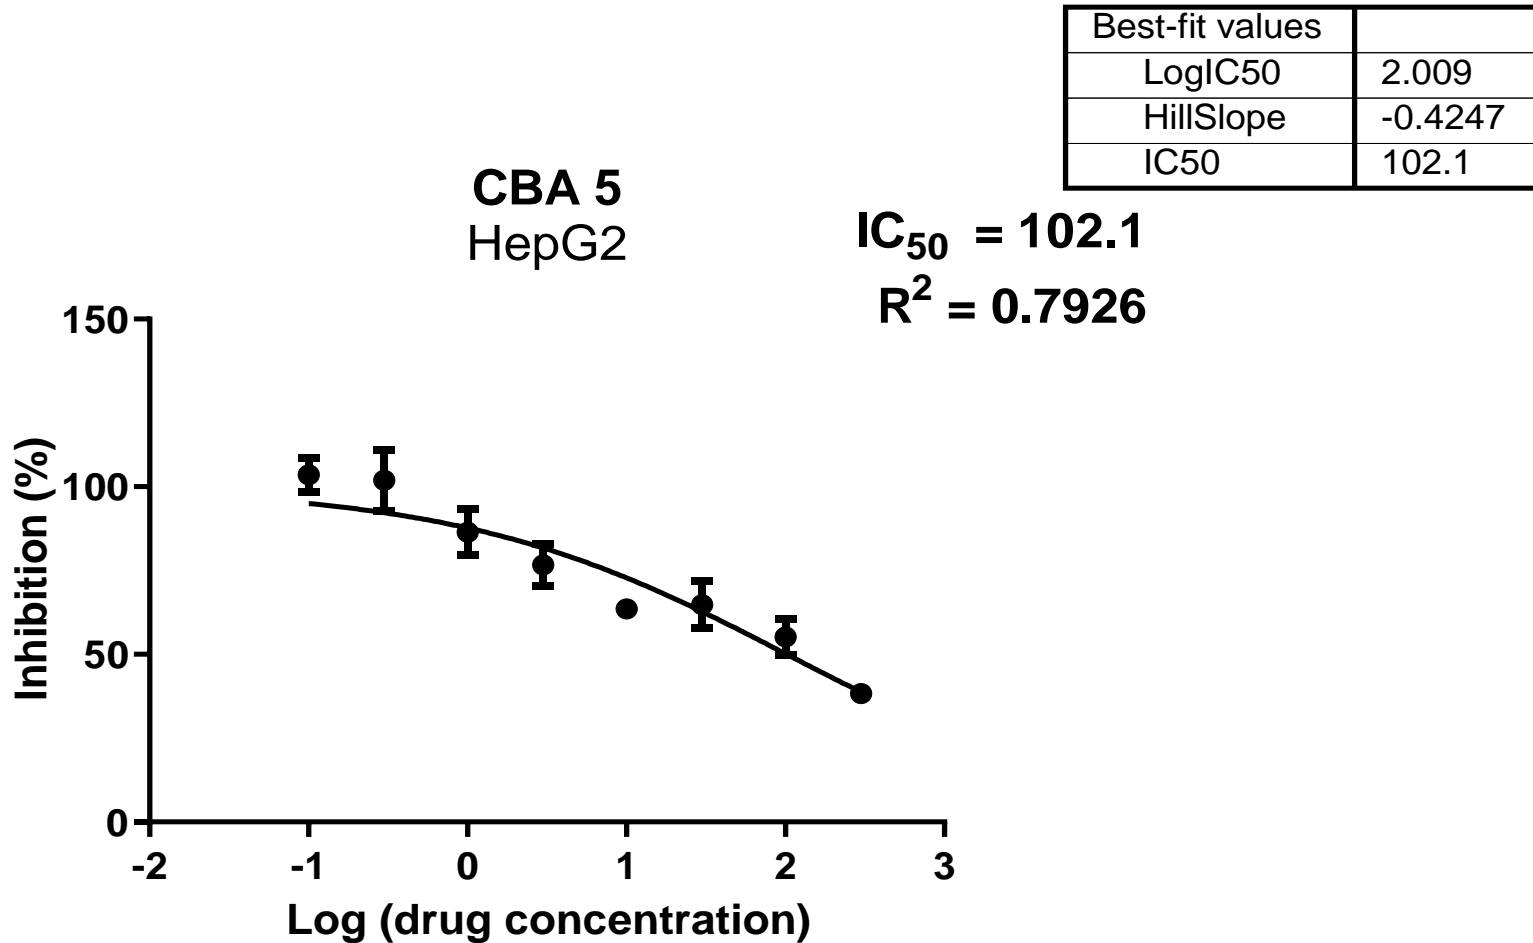

## Cytotoxicity of 12i against HepG2 cell line

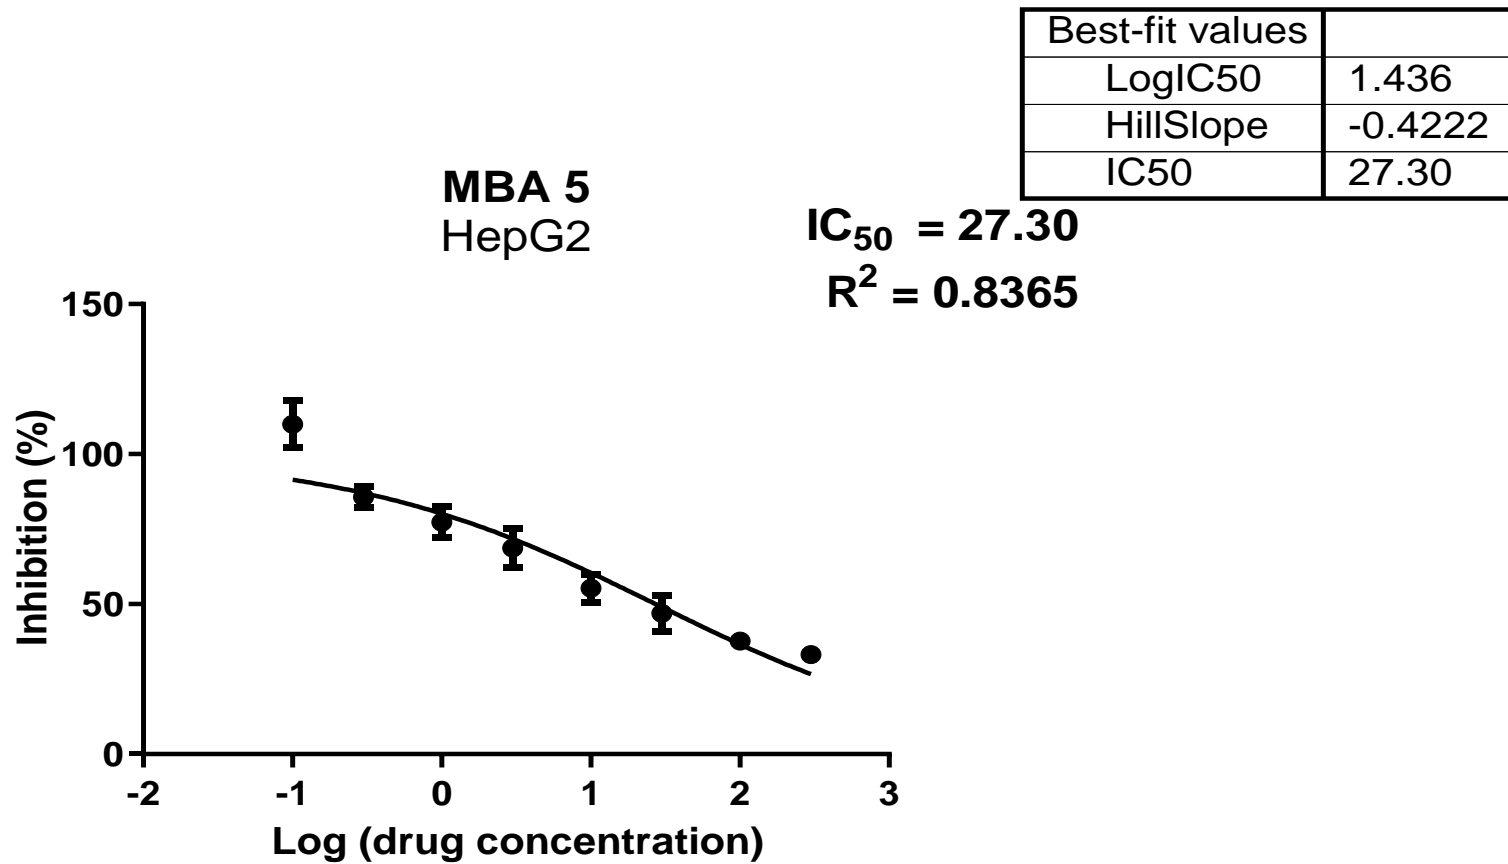

## Cytotoxicity of 12j against HepG2 cell line

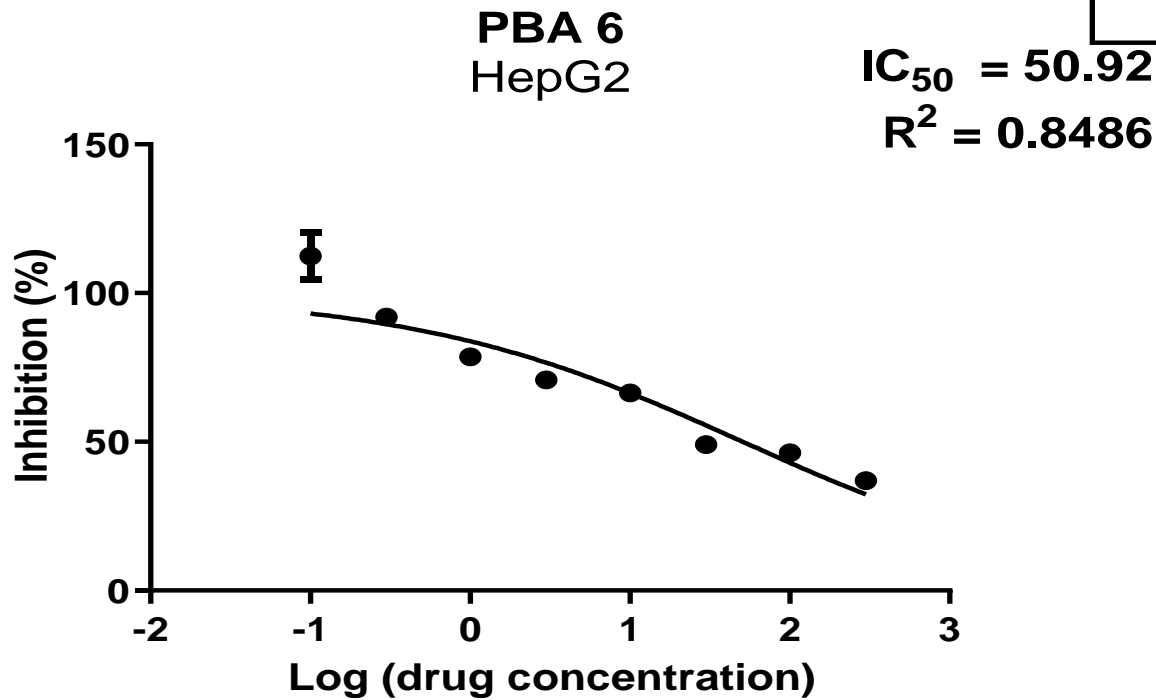

| Best-fit values |         |
|-----------------|---------|
| LogIC50         | 1.707   |
| HillSlope       | -0.4183 |
| IC50            | 50.92   |

## Cytotoxicity of 12k against HepG2 cell line

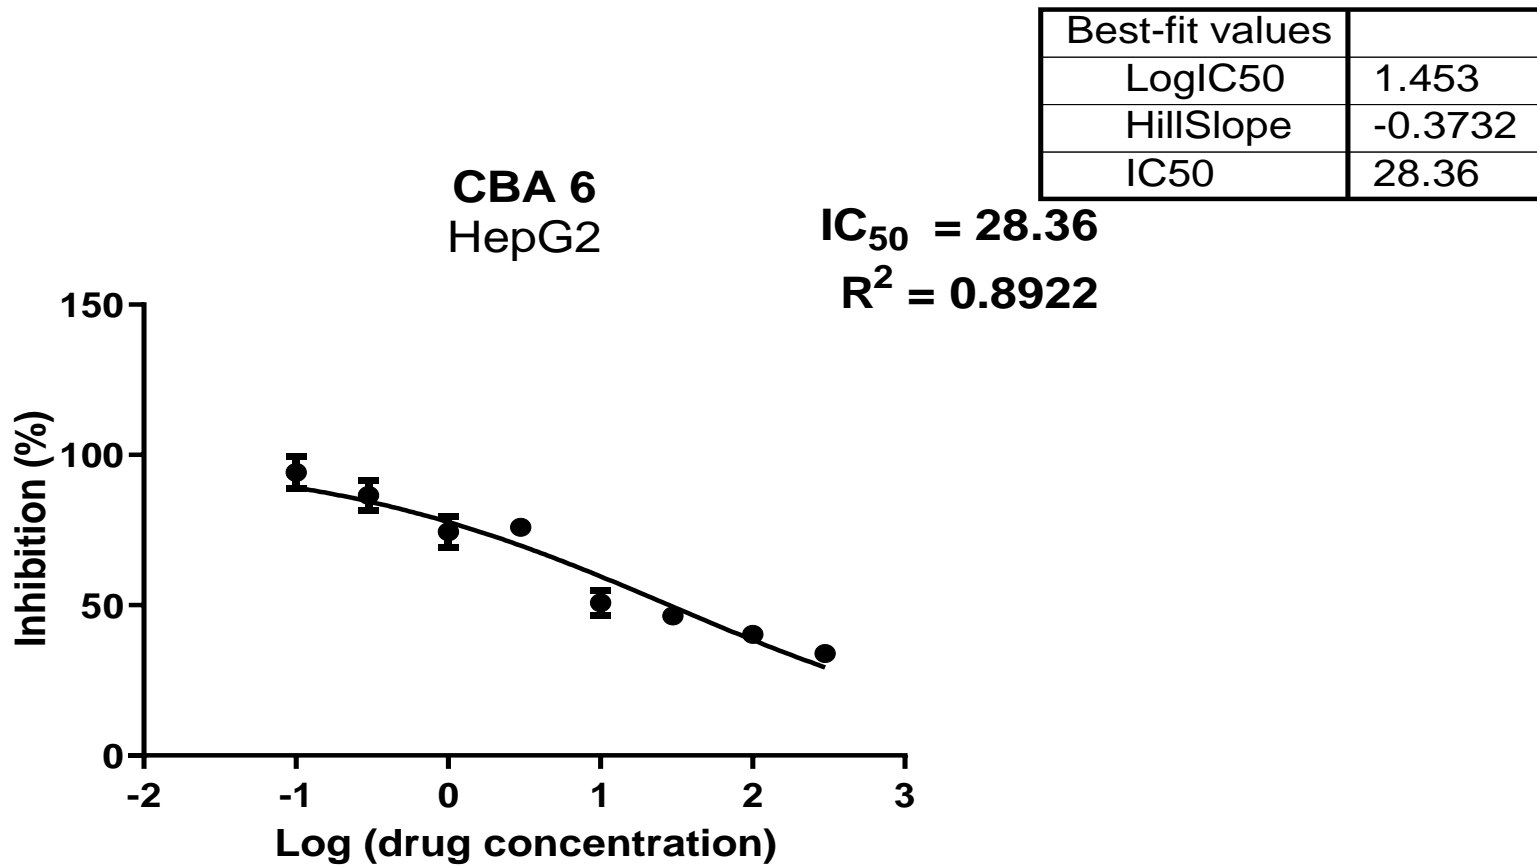



## Cytotoxicity of 12I against HepG2 cell line

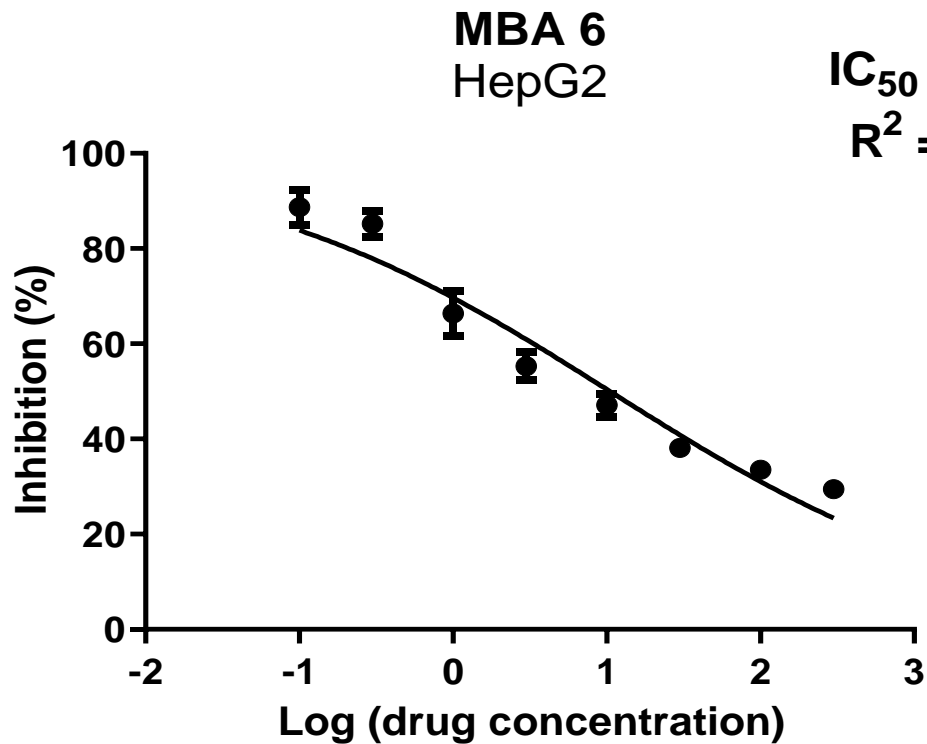

| Best-fit values     |         |
|---------------------|---------|
| LogIC <sub>50</sub> | 1.021   |
| HillSlope           | -0.3539 |
| IC <sub>50</sub>    | 10.50   |

## Cytotoxicity of 13a against HepG2 cell line

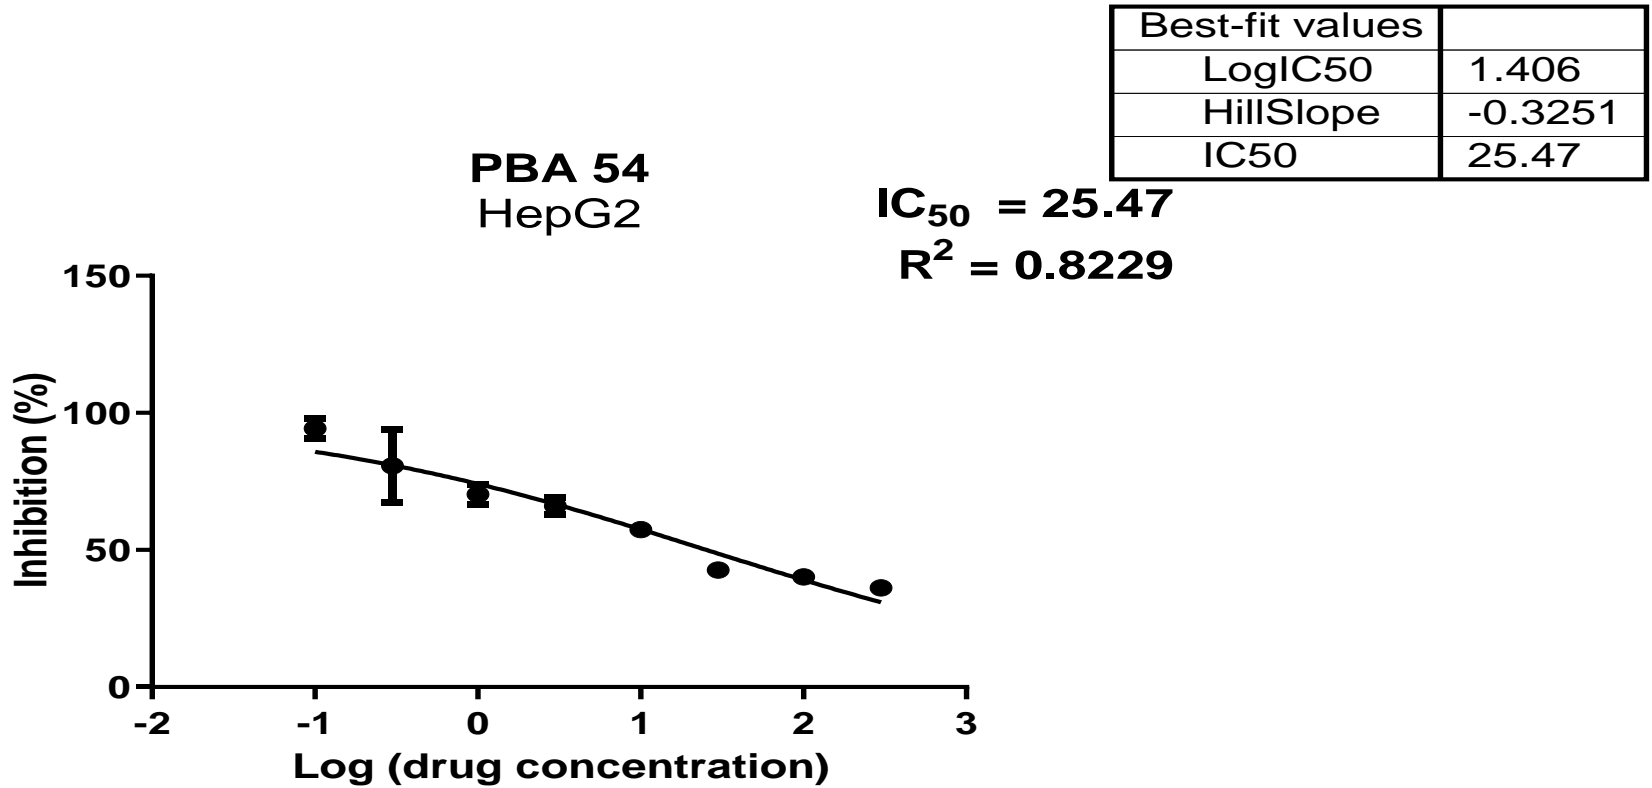

## Cytotoxicity of 13b against HepG2 cell line

| Best-fit values |         |
|-----------------|---------|
| LogIC50         | 1.624   |
| HillSlope       | -0.4269 |
| IC50            | 42.06   |

**CBA 54**  
HepG2

**IC<sub>50</sub> = 42.06**  
**R<sup>2</sup> = 0.8335**

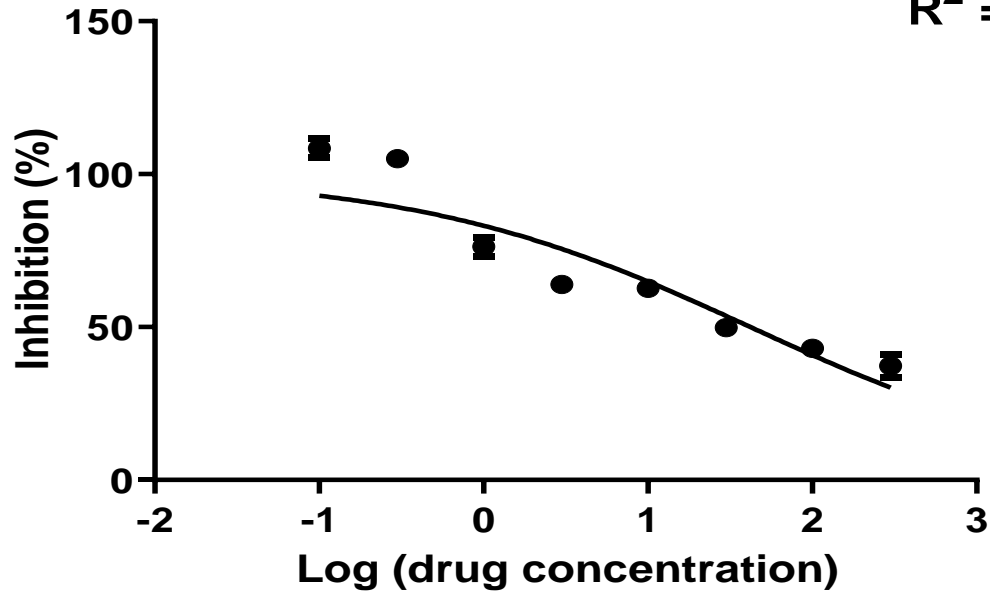

## Cytotoxicity of 13c against HepG2 cell line

| Best-fit values |         |
|-----------------|---------|
| LogIC50         | 1.388   |
| HillSlope       | -0.4036 |
| IC50            | 24.45   |

**MBA 54**  
HepG2

**IC<sub>50</sub> = 24.45**  
**R<sup>2</sup> = 0.9071**

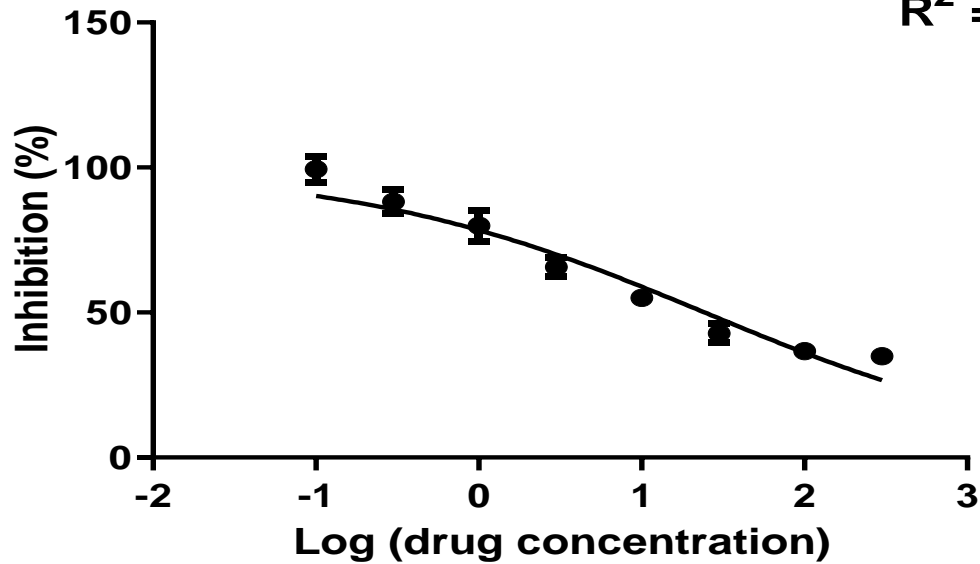

## Cytotoxicity of sorafenib against HepG2 cell line

| Best-fit values |         |
|-----------------|---------|
| LogIC50         | 0.7461  |
| HillSlope       | -0.3199 |
| IC50            | 5.573   |

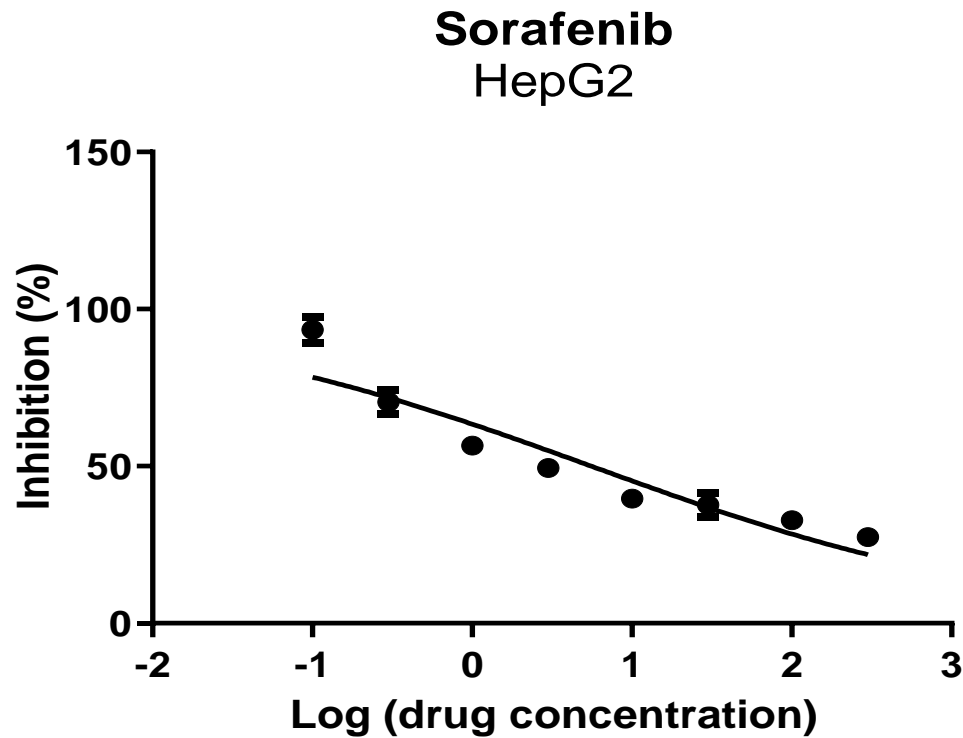

## Cytotoxicity of 12a against MCF-7 cell line

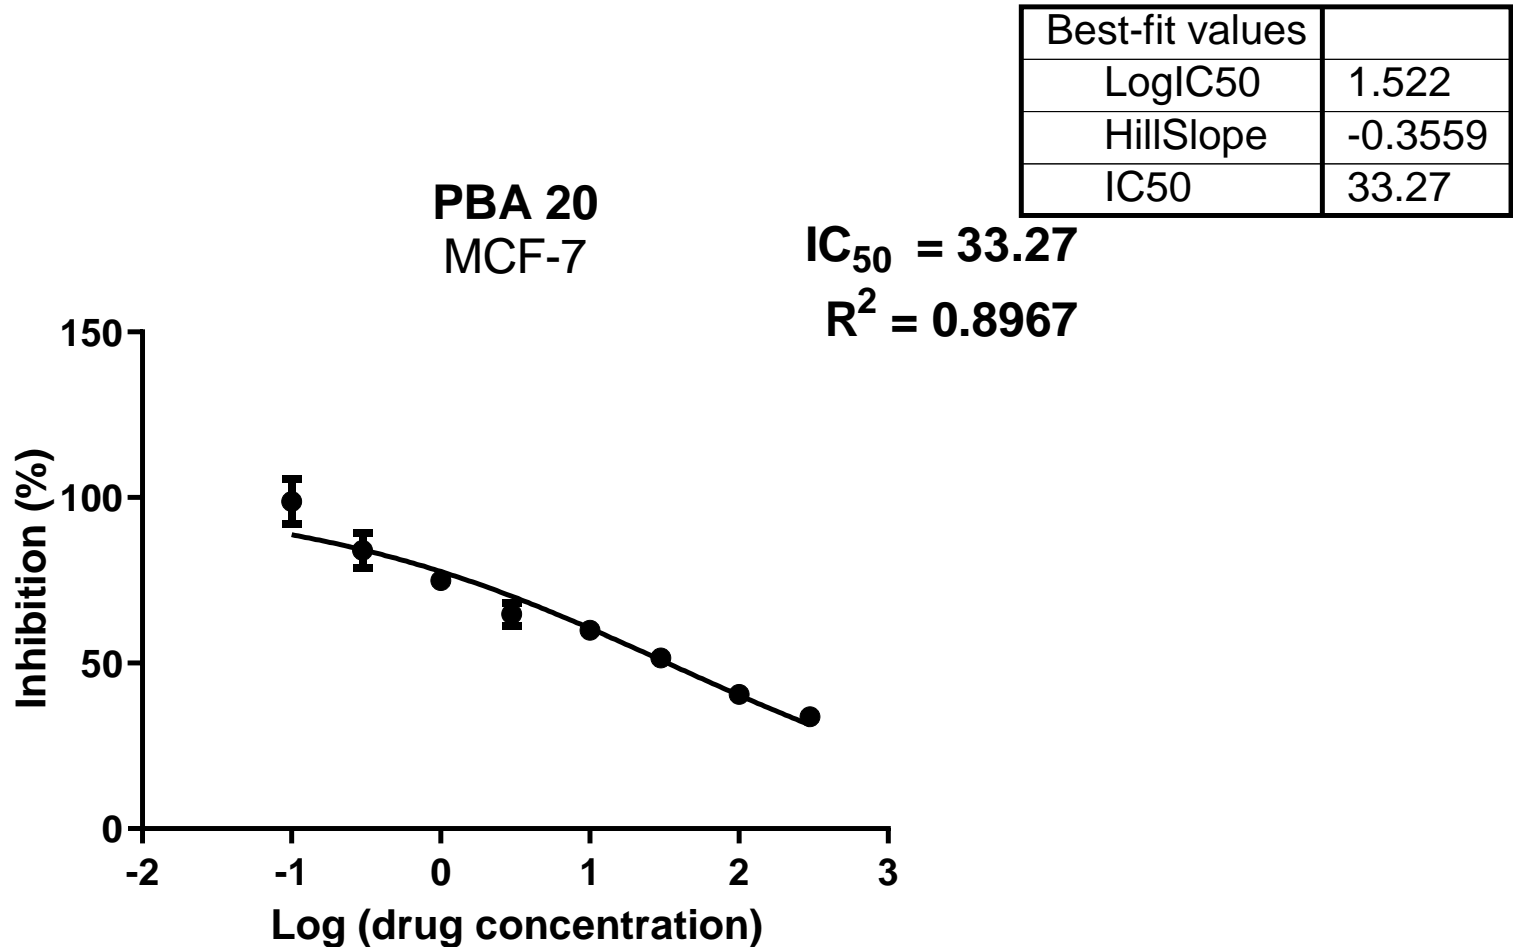

## Cytotoxicity of 12b against MCF-7 cell line

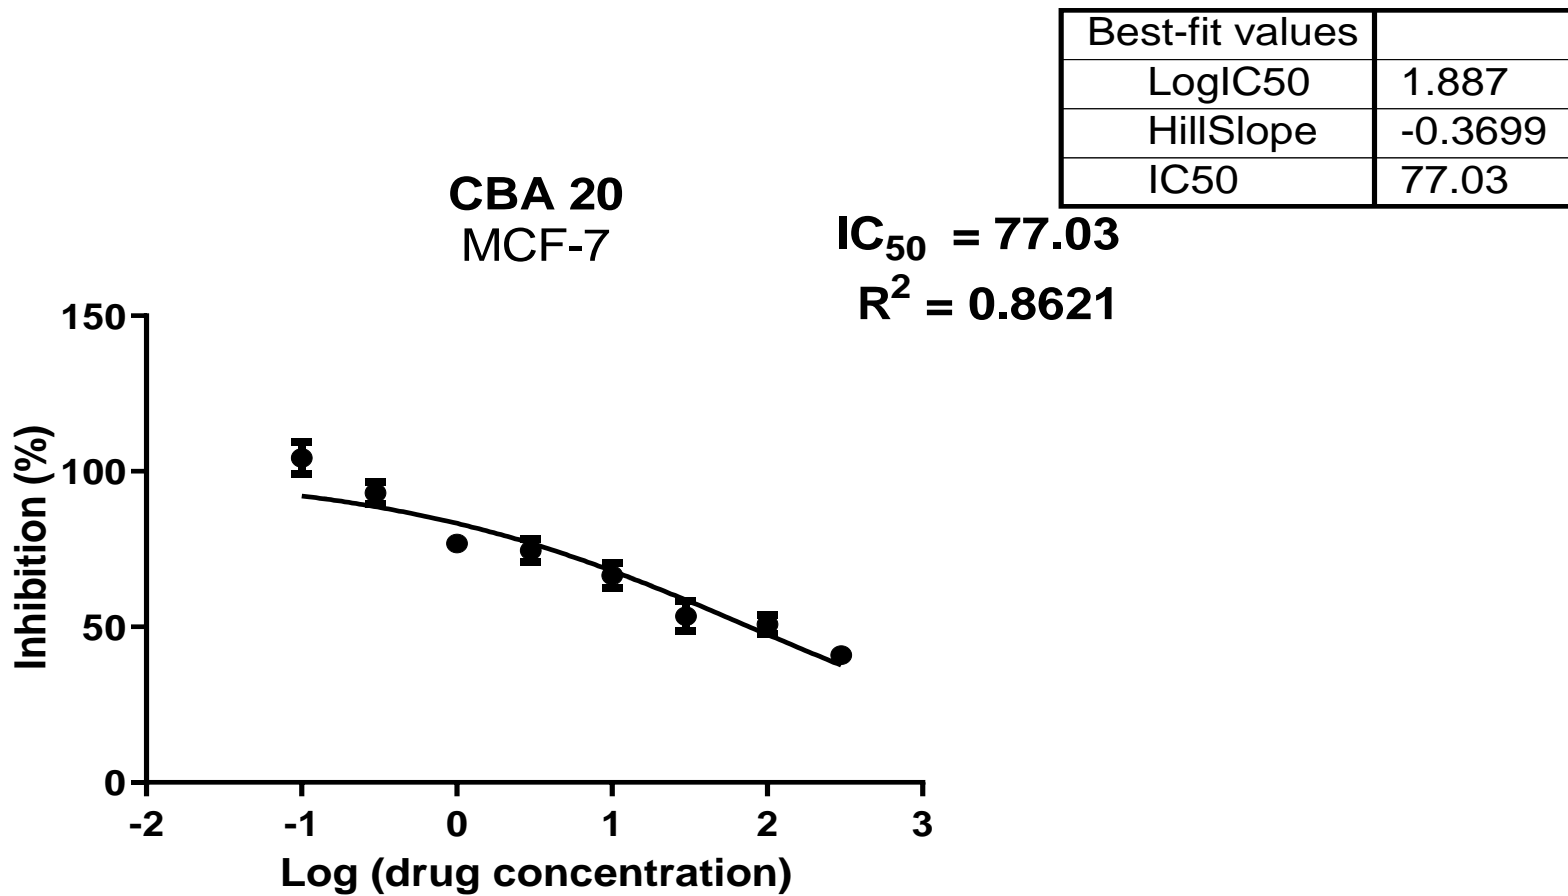

## Cytotoxicity of 12c against MCF-7 cell line

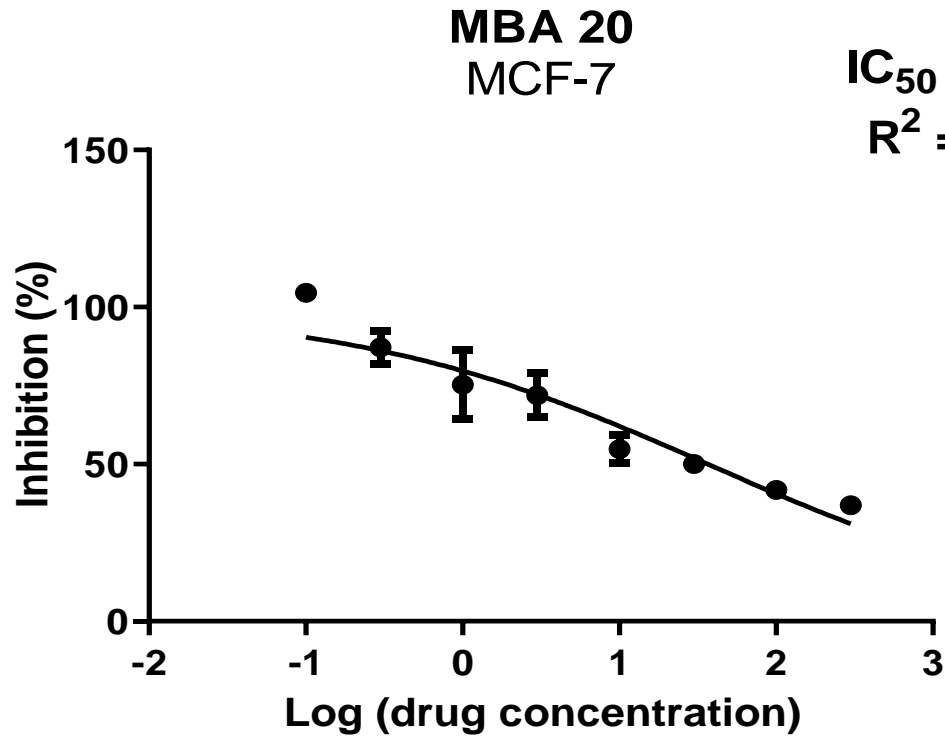

| Best-fit values     |         |
|---------------------|---------|
| LogIC <sub>50</sub> | 1.565   |
| HillSlope           | -0.3796 |
| IC <sub>50</sub>    | 36.72   |



## Cytotoxicity of 12d against MCF-7 cell line

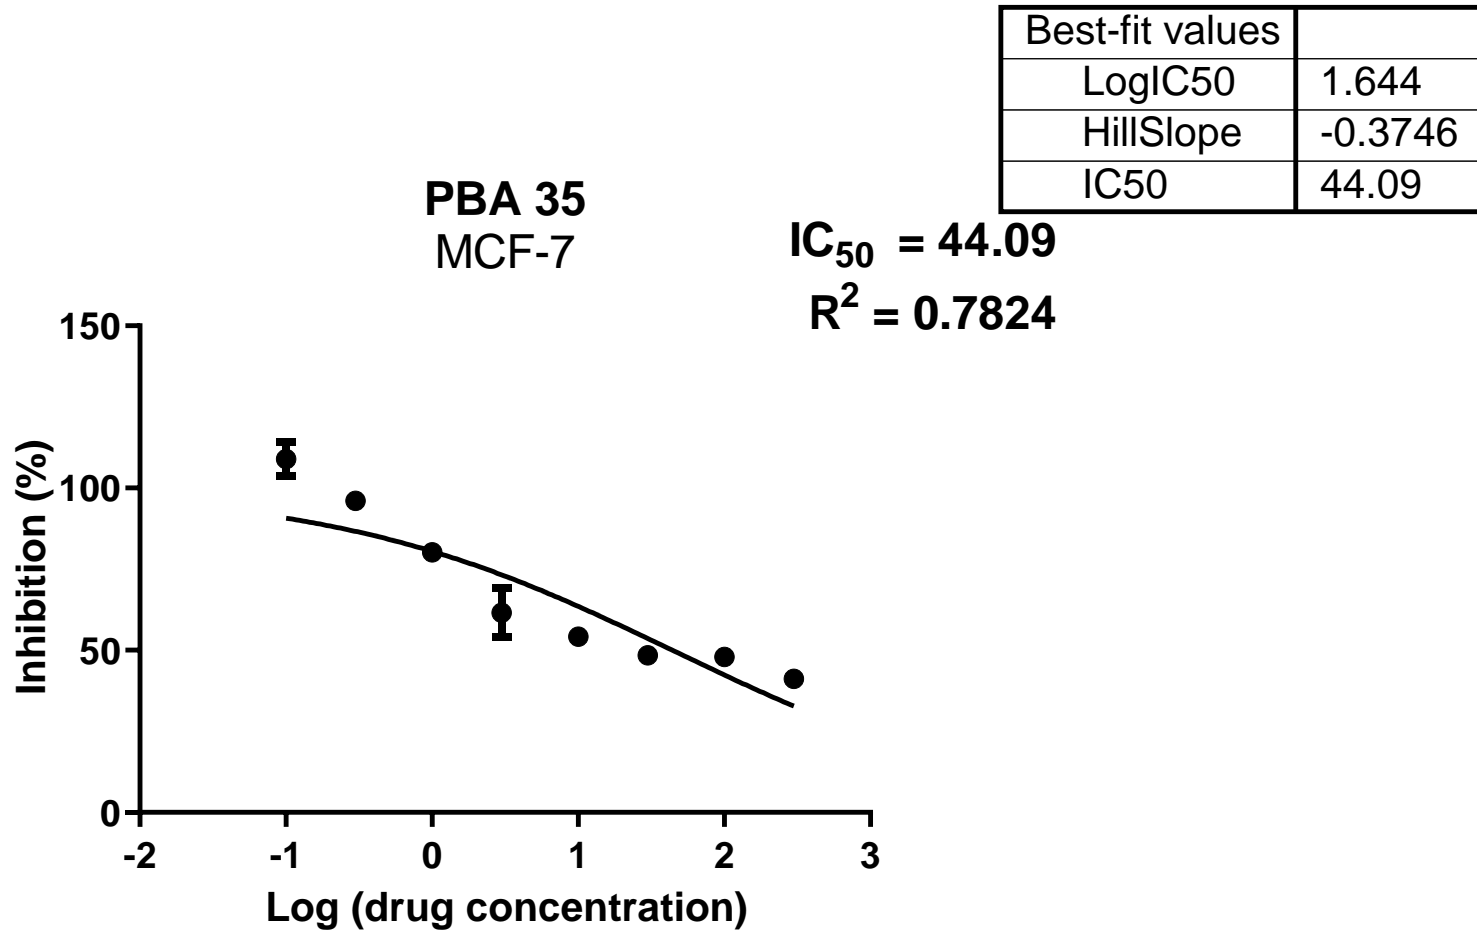

## Cytotoxicity of 12e against MCF-7 cell line

| Best-fit values |         |
|-----------------|---------|
| LogIC50         | 1.794   |
| HillSlope       | -0.3981 |
| IC50            | 62.29   |

**CBA 35**  
MCF-7

**IC<sub>50</sub> = 62.29**

**R<sup>2</sup> = 0.9027**

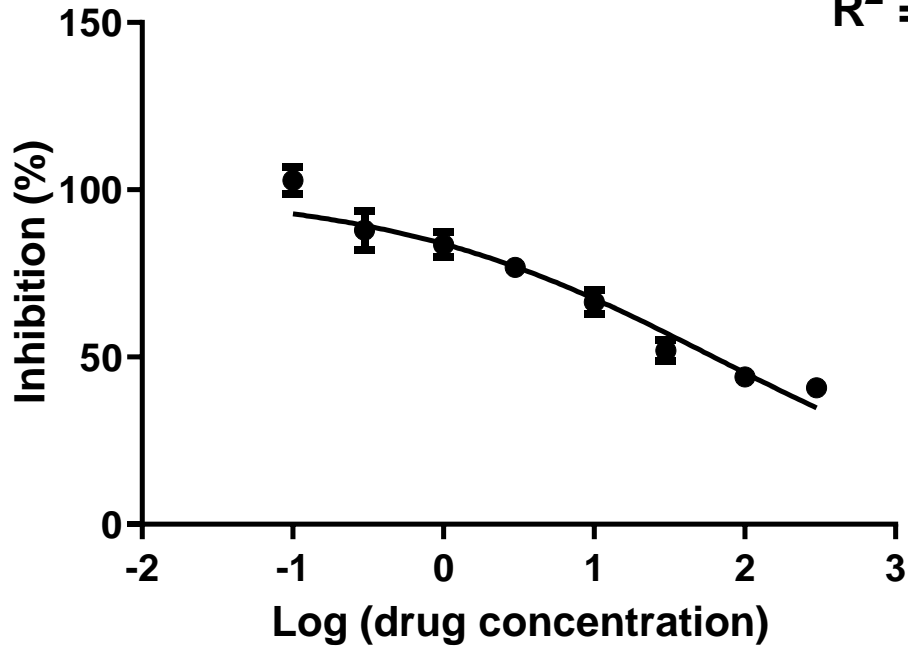

## Cytotoxicity of 12f against MCF-7 cell line

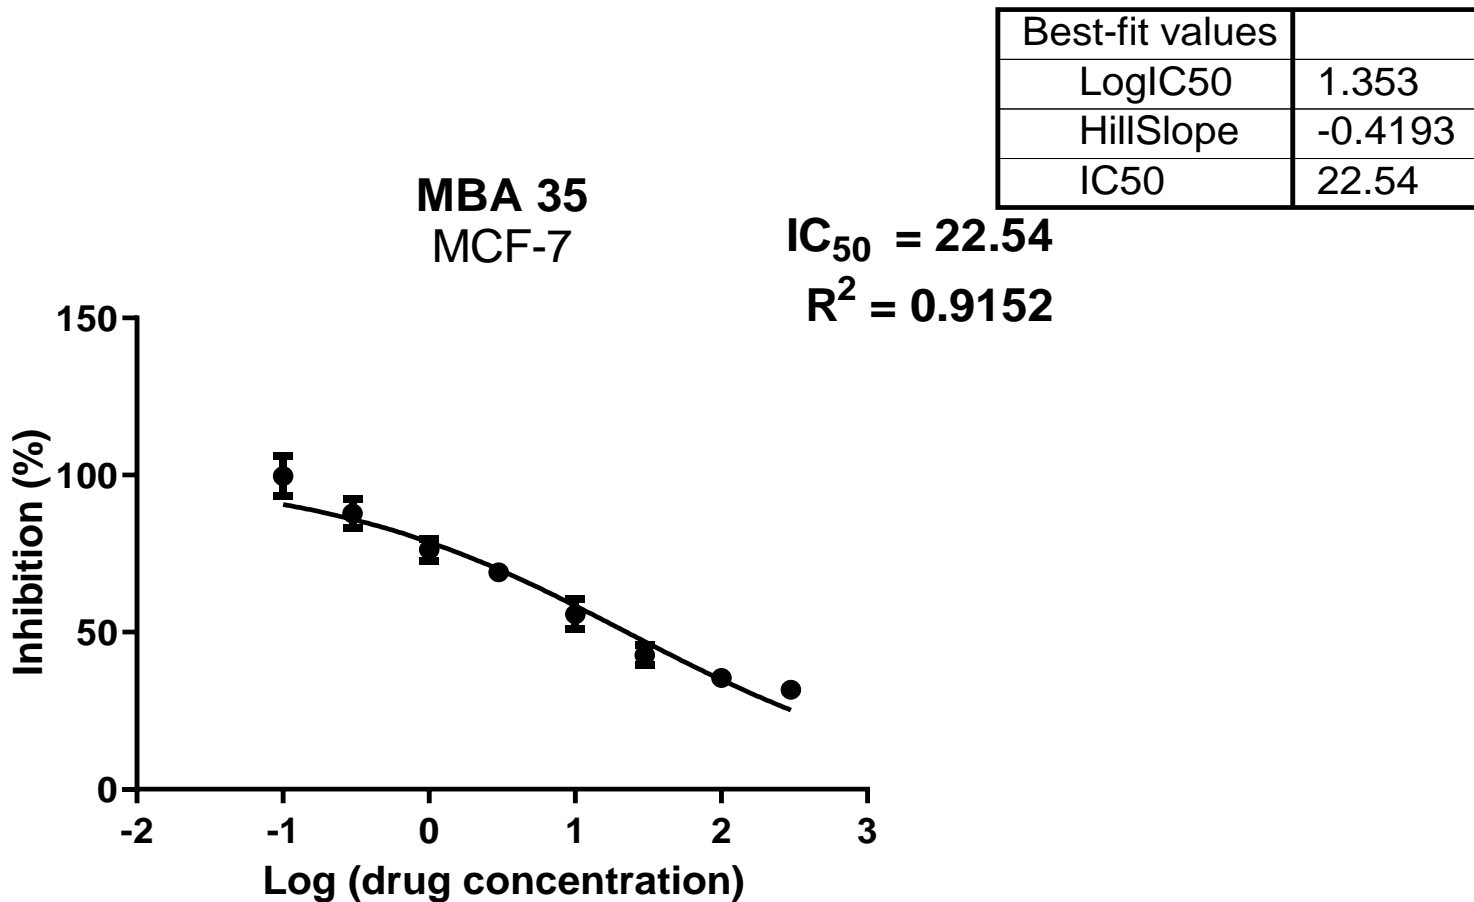

## Cytotoxicity of 12g against MCF-7 cell line

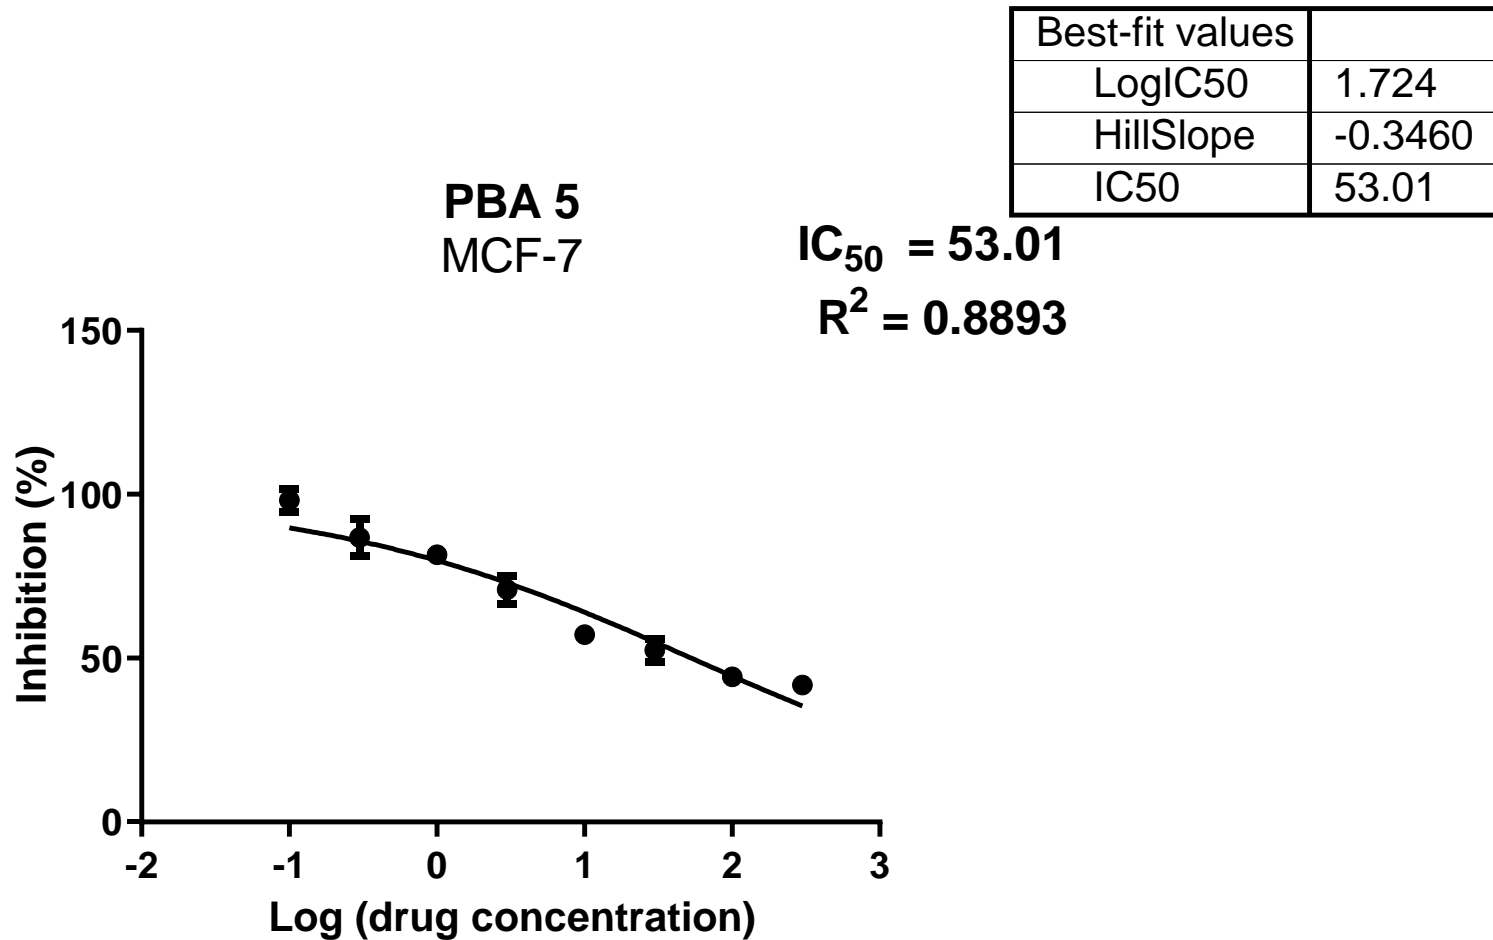

## Cytotoxicity of 12h against MCF-7 cell line

| Best-fit values |         |
|-----------------|---------|
| LogIC50         | 1.933   |
| HillSlope       | -0.3889 |
| IC50            | 85.62   |

**CBA 5**  
MCF-7

**IC<sub>50</sub> = 85.62**

**R<sup>2</sup> = 0.8516**

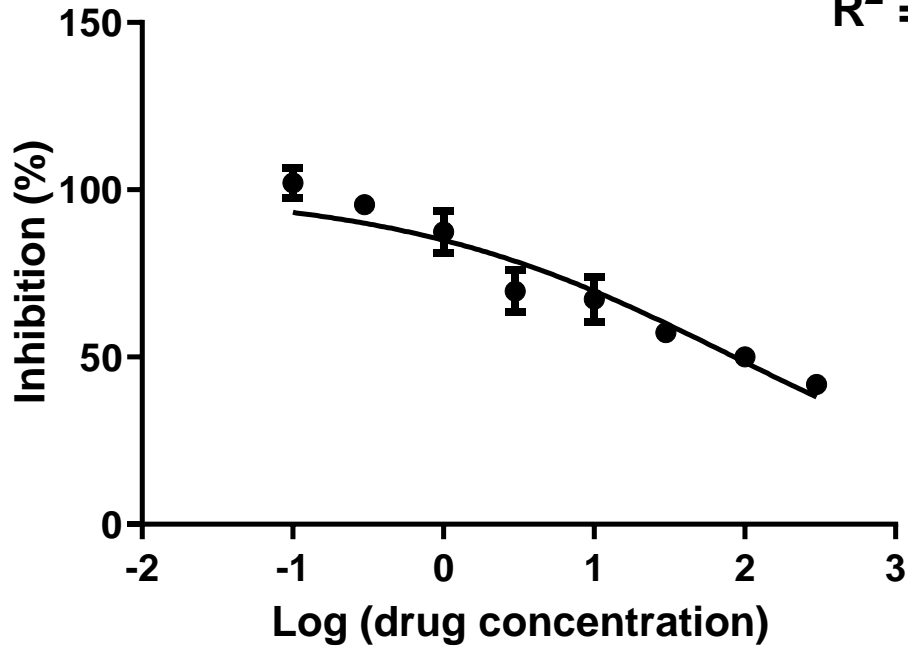

## Cytotoxicity of 12i against MCF-7 cell line

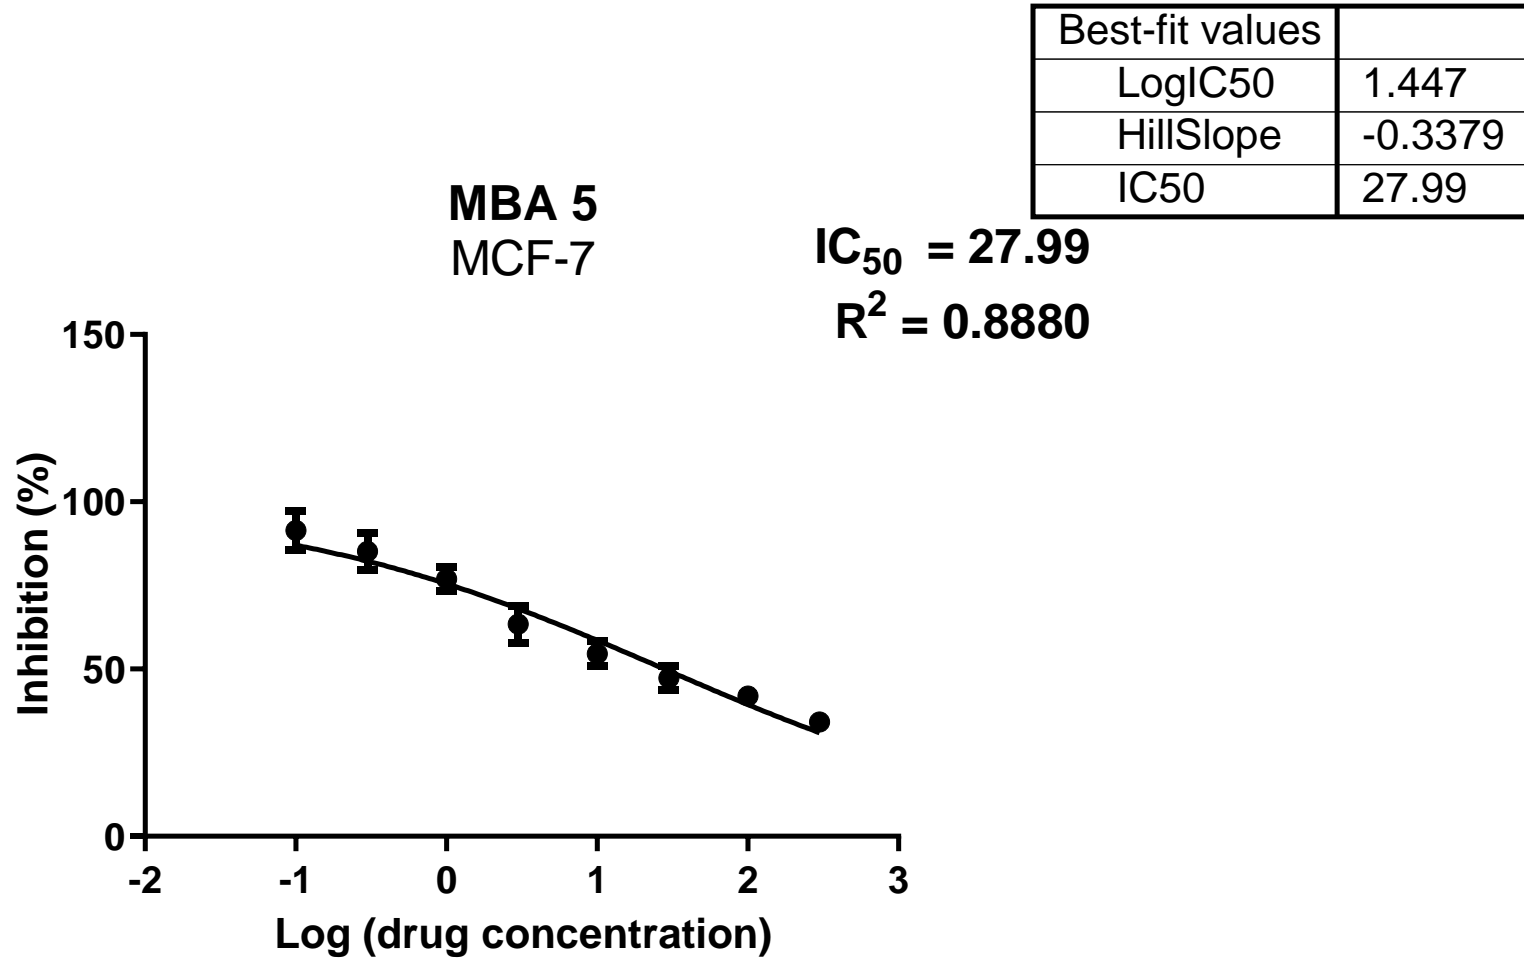

## Cytotoxicity of 12j against MCF-7 cell line

| Best-fit values |         |
|-----------------|---------|
| LogIC50         | 1.526   |
| HillSlope       | -0.2945 |
| IC50            | 33.61   |

**PBA 6**  
MCF-7

**IC<sub>50</sub> = 33.61**  
**R<sup>2</sup> = 0.8309**

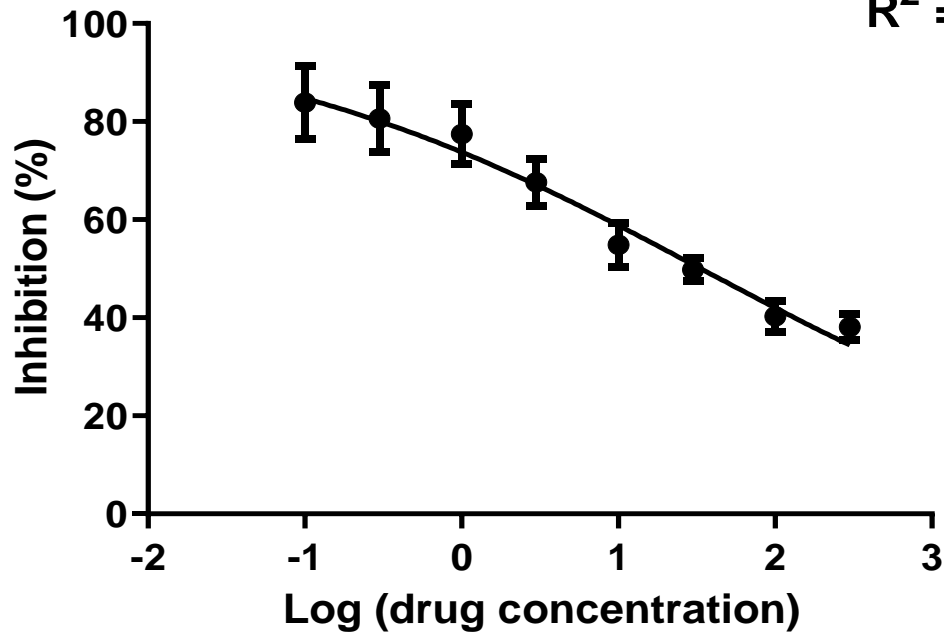

## Cytotoxicity of 12k against MCF-7 cell line

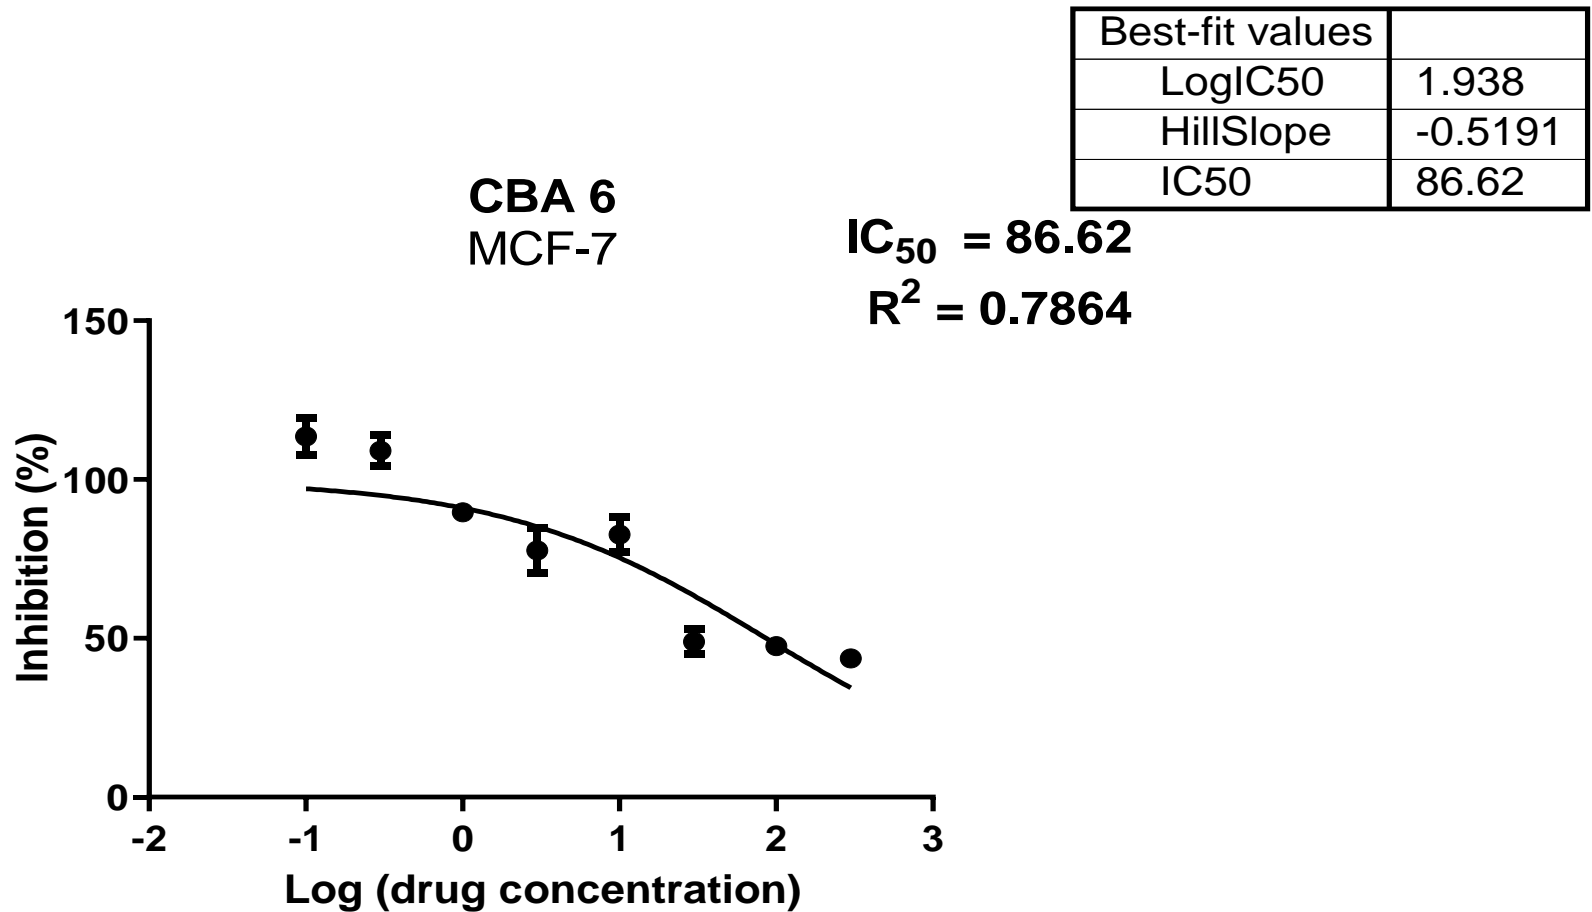



## Cytotoxicity of 12I against MCF-7 cell line

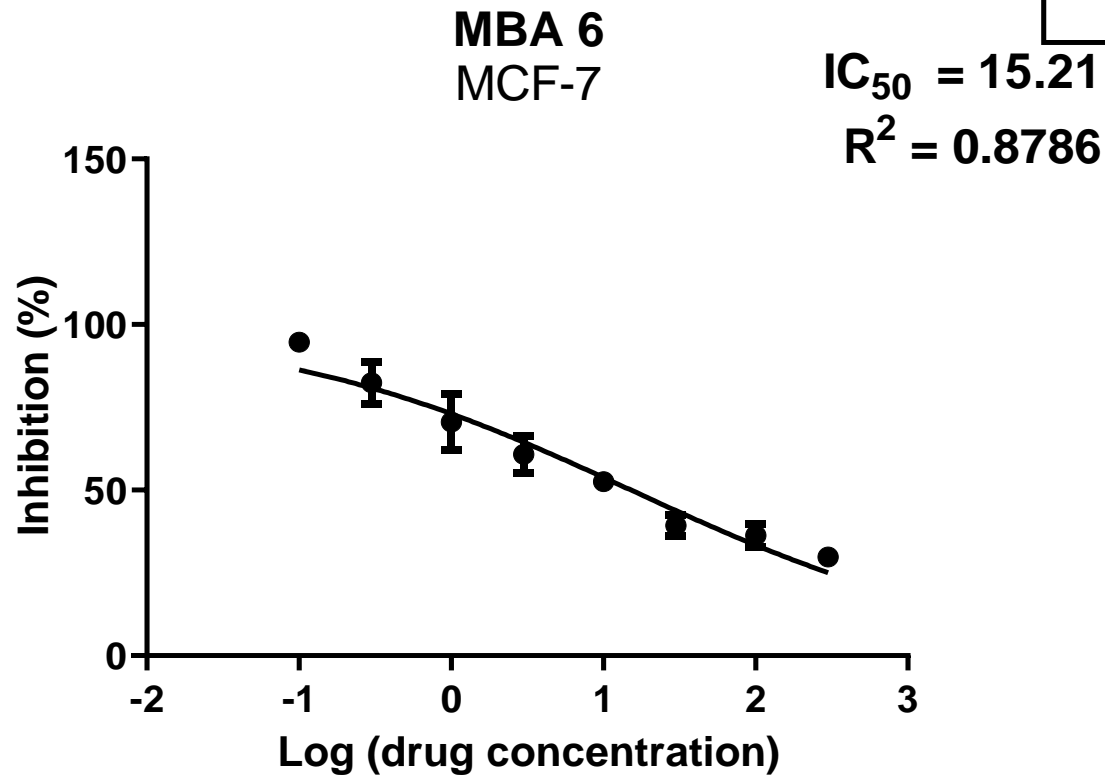

| Best-fit values |         |
|-----------------|---------|
| LogIC50         | 1.182   |
| HillSlope       | -0.3666 |
| IC50            | 15.21   |

## Cytotoxicity of 13a against MCF-7 cell line

| Best-fit values     |         |
|---------------------|---------|
| LogIC <sub>50</sub> | 1.511   |
| HillSlope           | -0.3328 |
| IC <sub>50</sub>    | 32.47   |

**PBA 54**  
MCF-7

**IC<sub>50</sub> = 32.47**  
**R<sup>2</sup> = 0.8597**

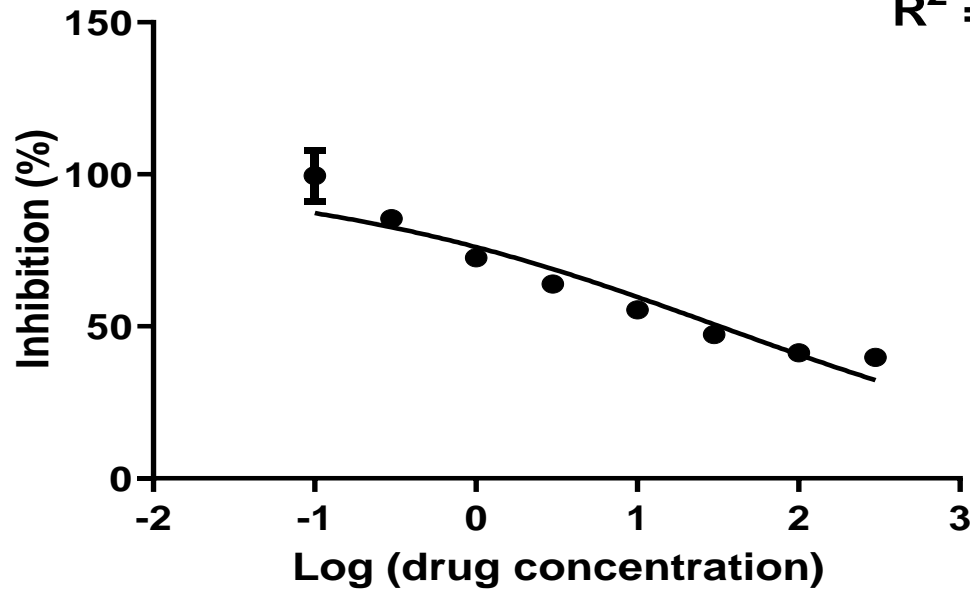

## Cytotoxicity of 13b against MCF-7 cell line

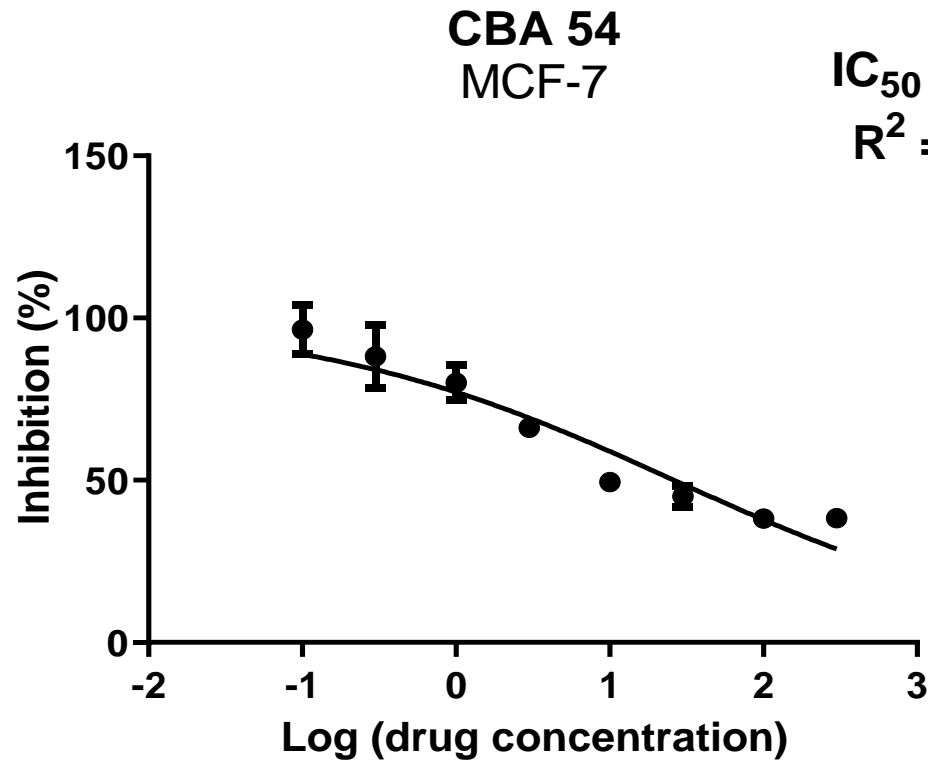

| Best-fit values |         |
|-----------------|---------|
| LogIC50         | 1.420   |
| HillSlope       | -0.3721 |
| IC50            | 26.31   |

## Cytotoxicity of 13c against MCF-7 cell line

| Best-fit values |         |
|-----------------|---------|
| LogIC50         | 1.725   |
| HillSlope       | -0.3505 |
| IC50            | 53.13   |

**MBA 54**  
MCF-7

**IC<sub>50</sub> = 53.13**  
**R<sup>2</sup> = 0.8224**

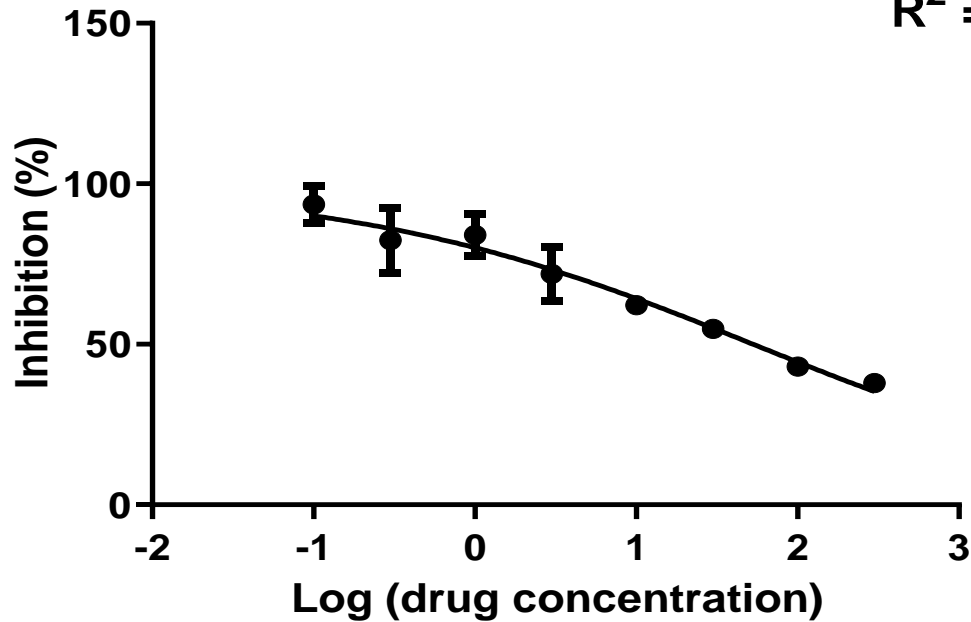

## Cytotoxicity of sorafenib against MCF-7 cell line

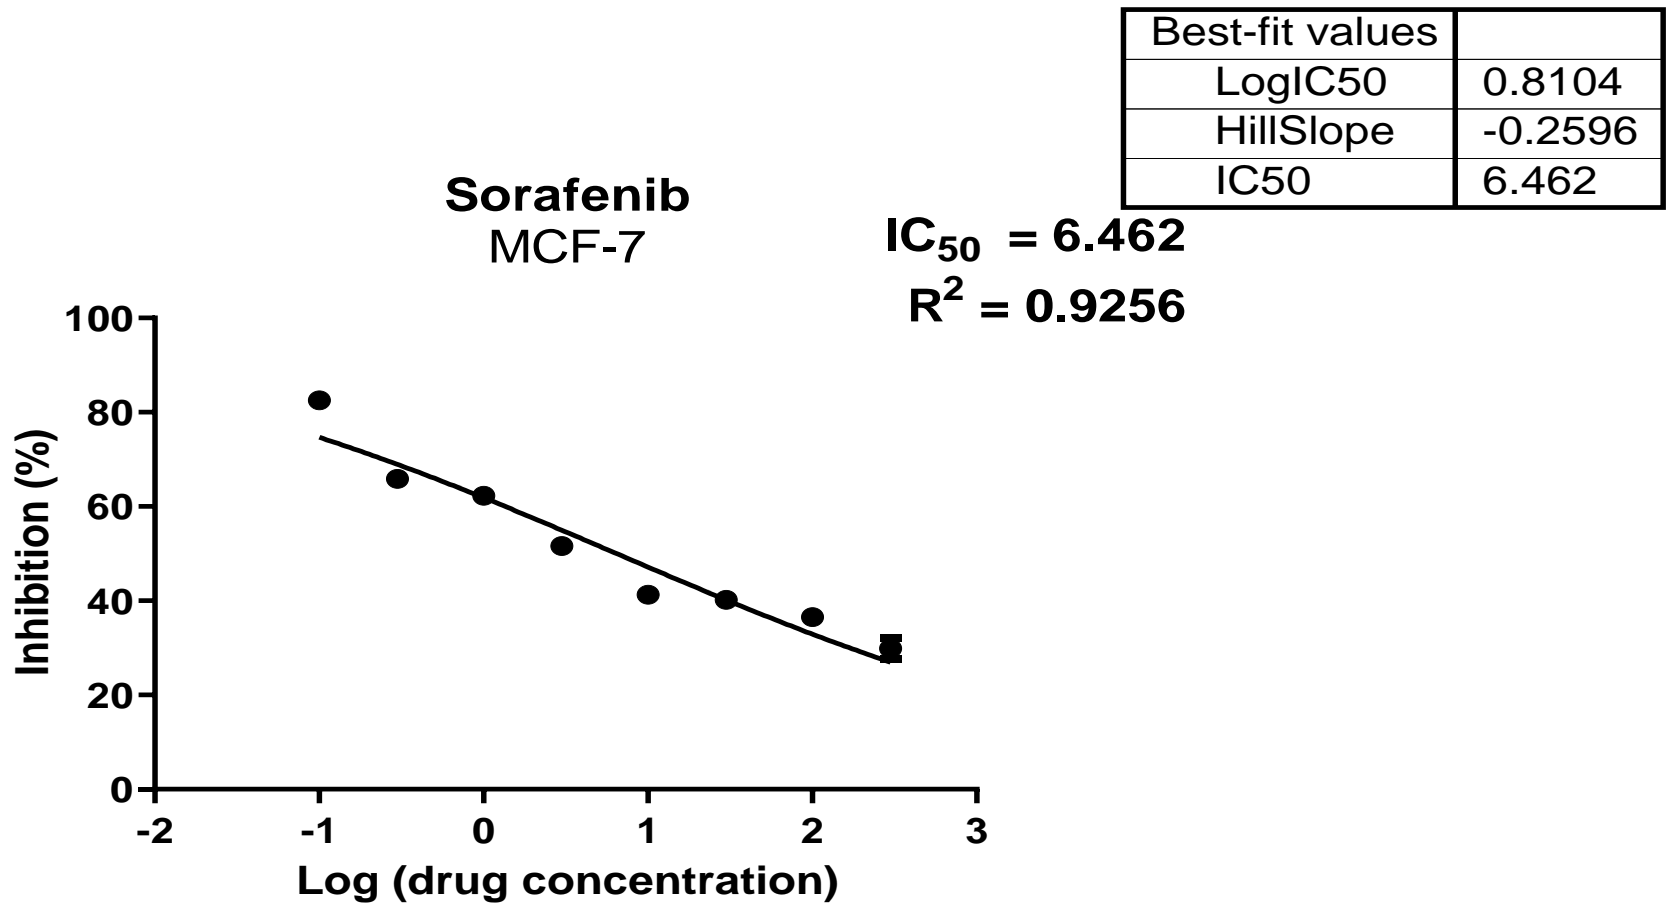

**Raw data of the cytotoxicity of the most potent compounds against normal cell line (WI-38)**

# (WI-38)

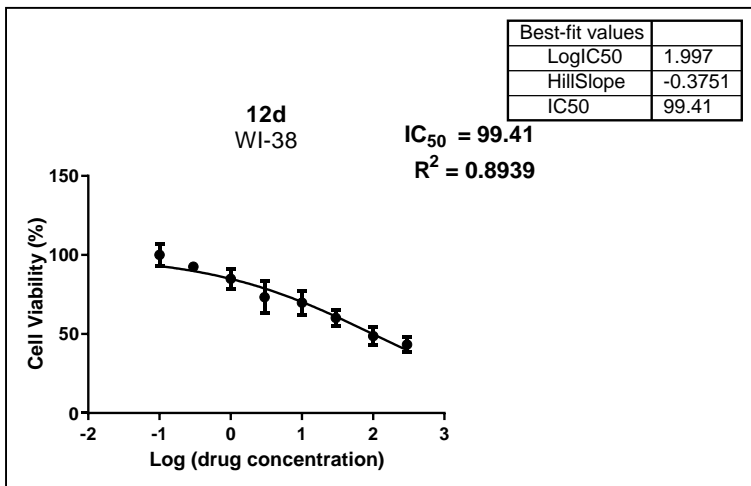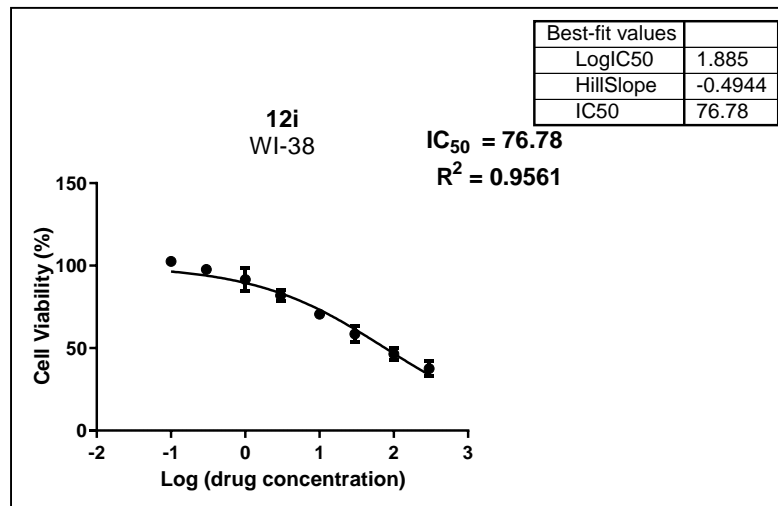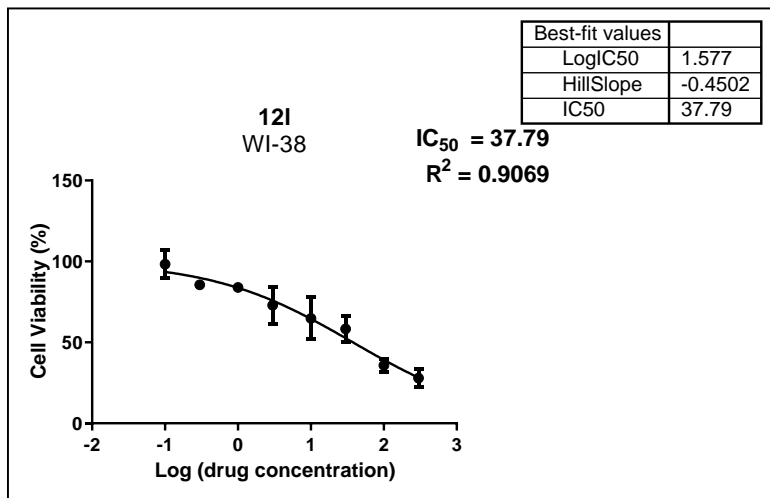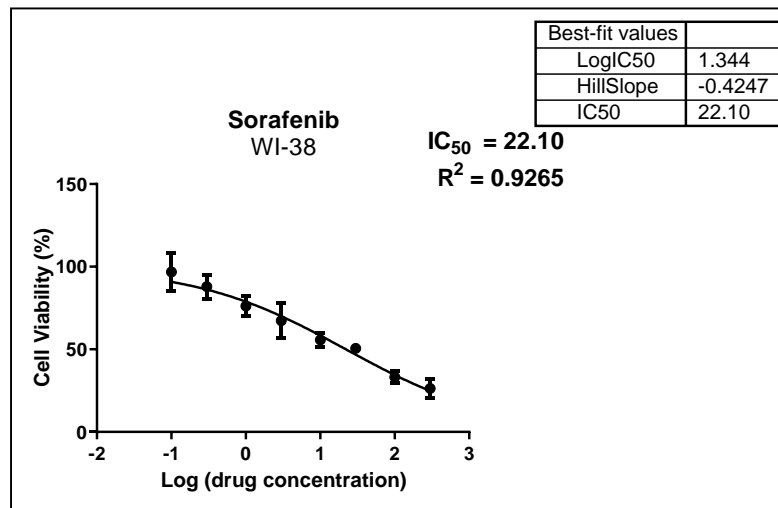

**Raw data of the synthesized compounds  
against VEGFR-2**



## VEGFR-2 assay of compound **12d**

| Best-fit values |         |
|-----------------|---------|
| LogIC50         | 2.289   |
| HillSlope       | -0.4166 |
| IC50            | 194.6   |

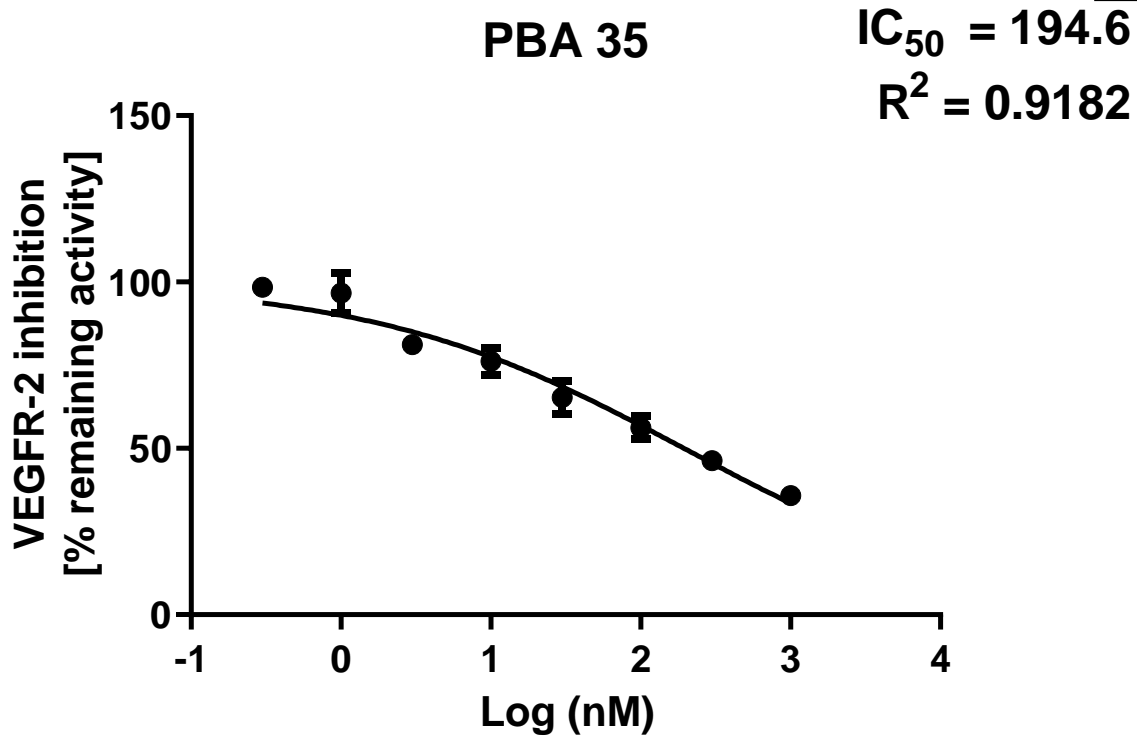

# VEGFR-2 assay of compound **12f**

| Best-fit values     |         |
|---------------------|---------|
| LogIC <sub>50</sub> | 2.423   |
| HillSlope           | -0.3283 |
| IC <sub>50</sub>    | 264.9   |

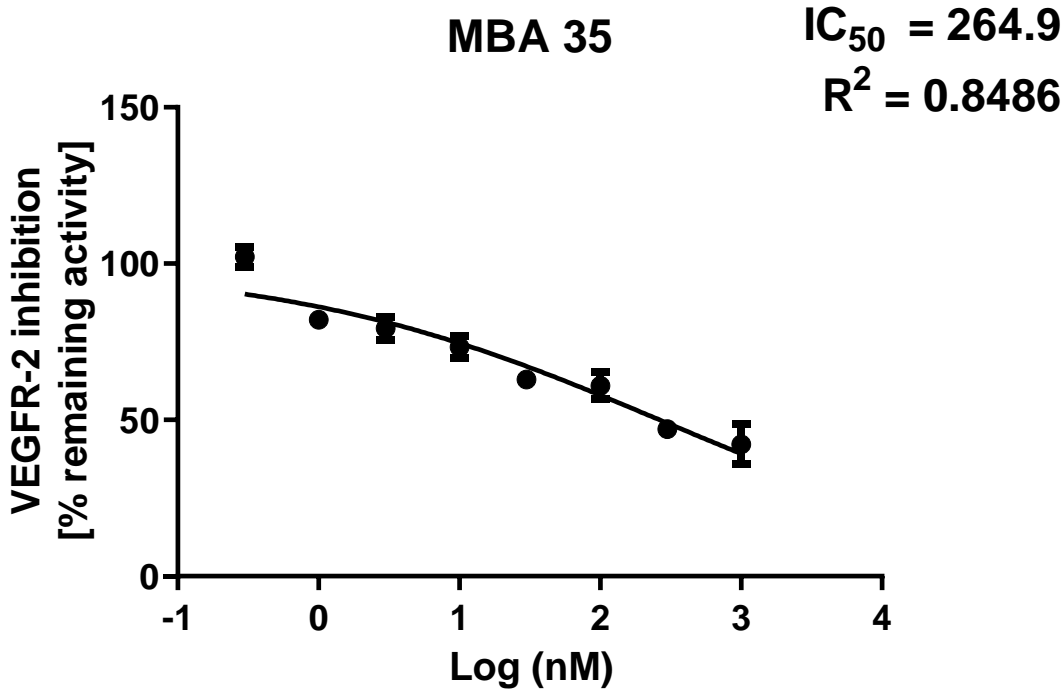

## VEGFR-2 assay of compound **12i**

| Best-fit values |         |
|-----------------|---------|
| LogIC50         | 2.190   |
| HillSlope       | -0.3818 |
| IC50            | 155.0   |

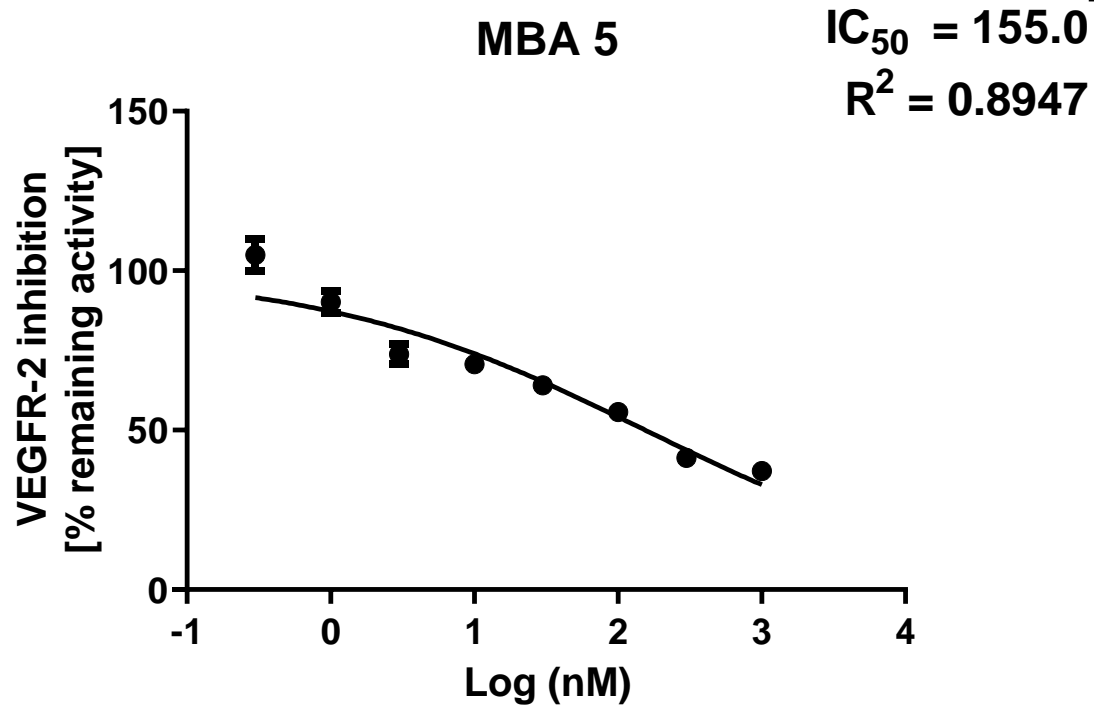

## VEGFR-2 assay of compound **12I**

| Best-fit values |         |
|-----------------|---------|
| LogIC50         | 1.988   |
| HillSlope       | -0.4614 |
| IC50            | 97.38   |

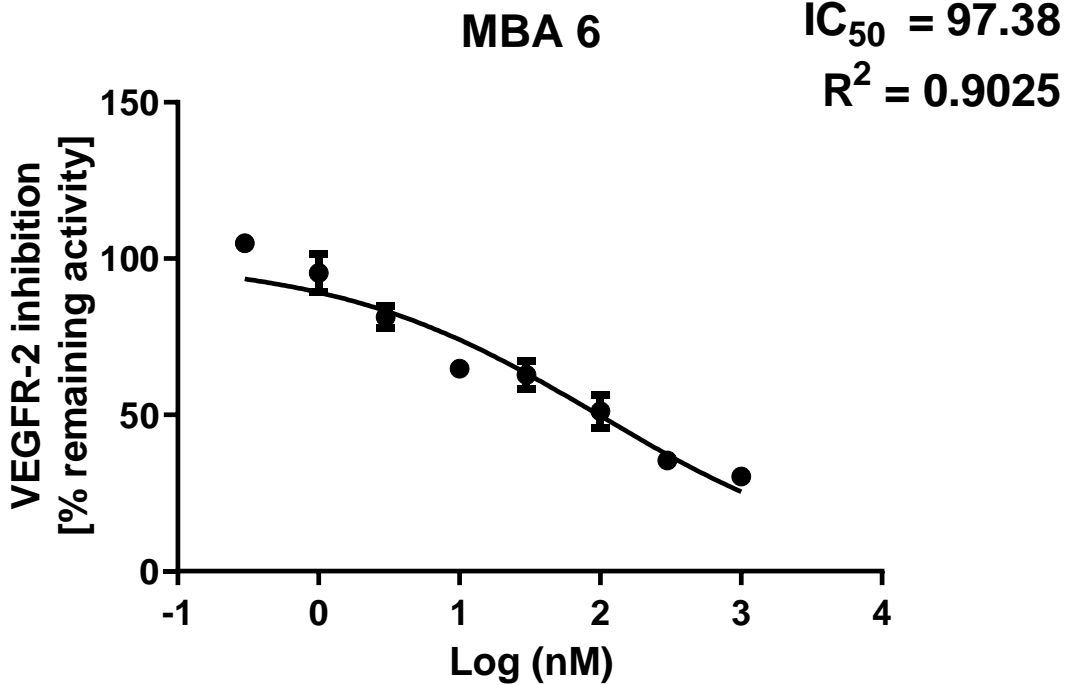

## VEGFR-2 assay of compound **13a**

| Best-fit values |         |
|-----------------|---------|
| LogIC50         | 2.428   |
| HillSlope       | -0.5089 |
| IC50            | 267.8   |

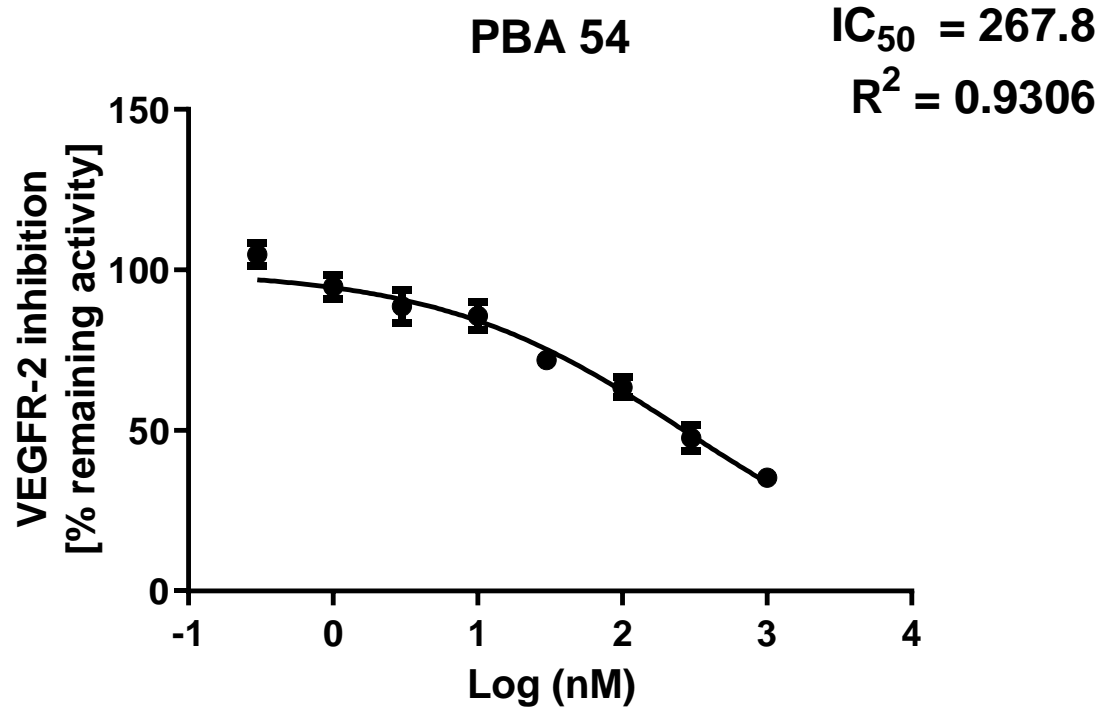

## VEGFR-2 assay of compound **Sorafenib**

| Best-fit values |         |
|-----------------|---------|
| LogIC50         | 1.683   |
| HillSlope       | -0.4367 |
| IC50            | 48.16   |

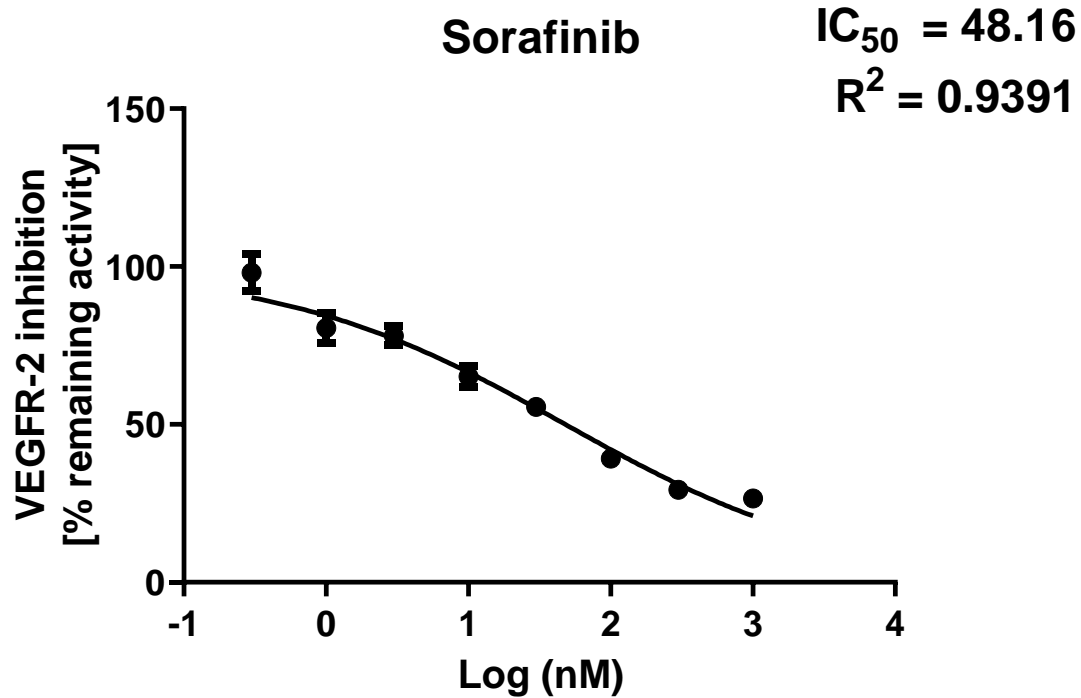

Supplement: IENZ_A_2103552_SM9256.pdf [file IENZ_A_2103552_SM9256.pdf]
